# Supplementary material for: Circulating inflammatory cytokines and risk of five cancers: a Mendelian randomization analysis
Source: Springer Nature journal article supplement (doi:10.1186/s12916-021-02193-0), 2022-01-11
Supplement: MOESM4 [file 12916_2021_2193_MOESM4_ESM.pdf]

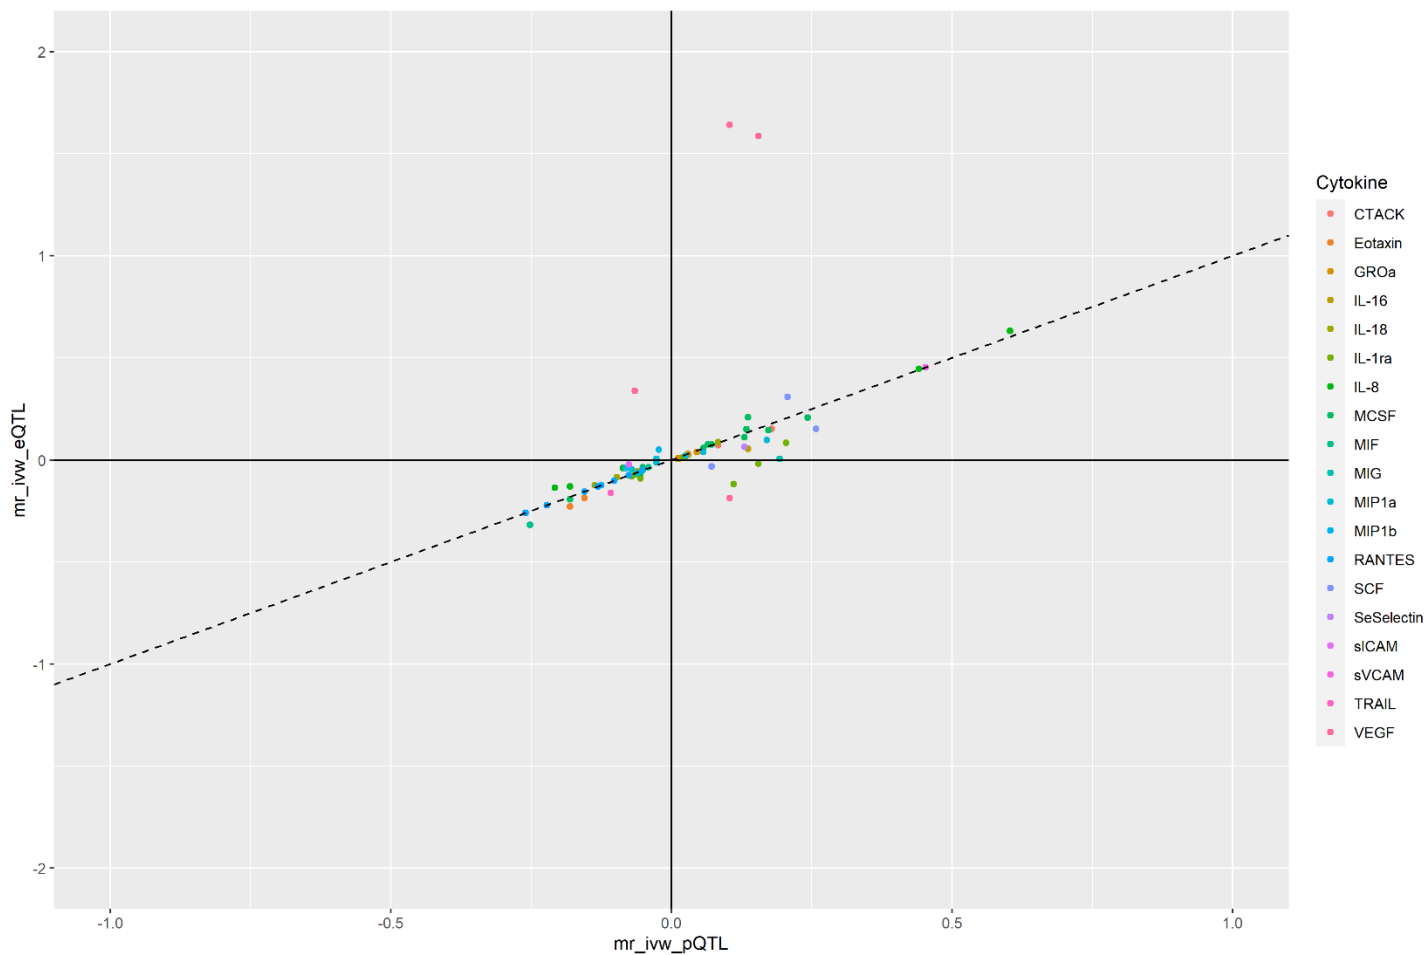

**Supplementary figure 1.** Correlation of MR-IVW estimates (betas) using the two different instrument definitions. Y axis represents the MR IVW estimates using the cis-eQTL and X axis represents the MR IVW estimates using the cis-pQTL instrument definition.

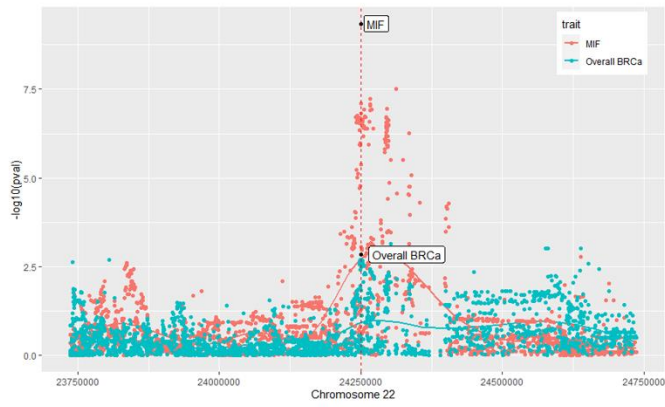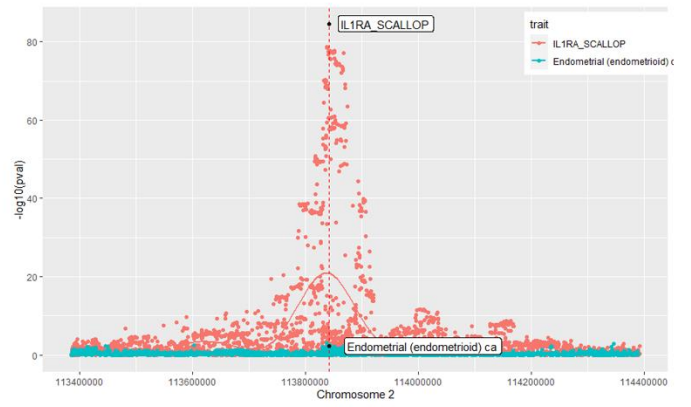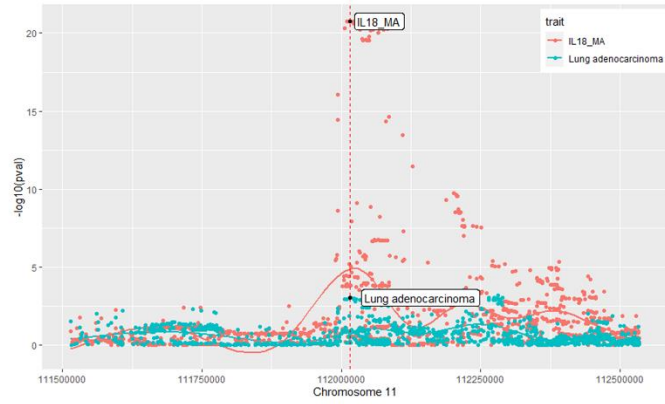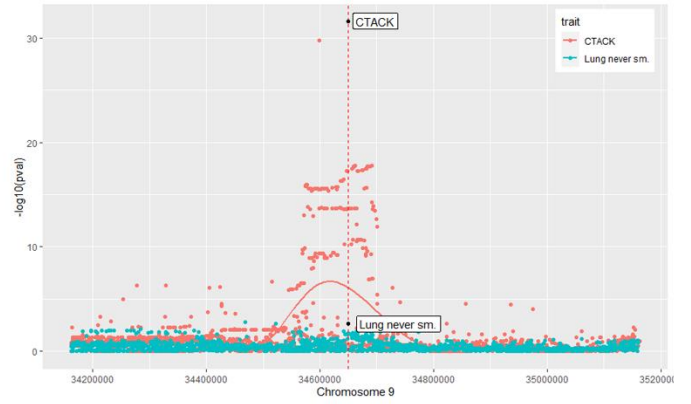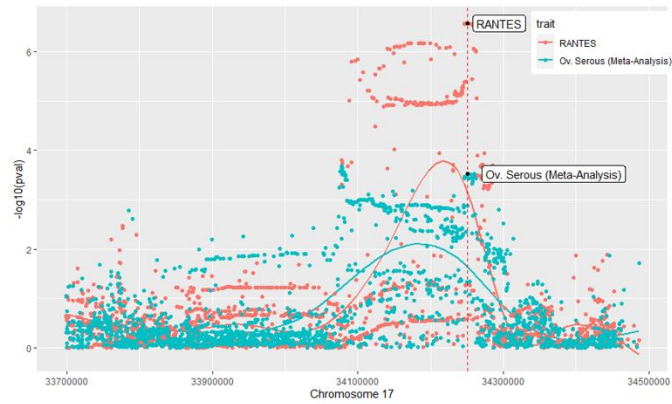

**Supplementary figure 2.** Associations that showed MR evidence for both causality and colocalization (posterior probability > 0.8) are plotted, within  $\pm 500$  kb of the gene locus of the exposure cytokine.
