# Supplementary material for: Circulating inflammatory cytokines and risk of five cancers: a Mendelian randomization analysis
Source: BMC Med. 2022 Jan 11;20:3. doi: 10.1186/s12916-021-02193-0 (PMC8750876; doi:10.1186/s12916-021-02193-0)
Supplement: Supplementary file 2 — Additional file 2. (Supplemental Tables): Supplementary Table 1. Sources of GX instruments per cytokine & genetic locus of cytokine. Supplementary Table 2. Genetic association estimates that were used in the MR analyses. Supplementary Table 3. Sources of GY instruments per cancer outcome. Supplementary Table 4. Genetic association estimates that were used in the MR analyses. Supplementary Table 5. Summary of the MR results based on the cis-pQTL instrument definition. Supplementary Table 6. Summary of the MR results based on the cis-eQTL instrument definition. Supplementary Table 7. Identification of druggable targets using publicly available repositories. Supplementary Table 8. Summary of epidemiological evidence linking prediagnostic cytokine concentrations to cancer risk. Supplementary Table 9. KeGG pathways in which significant cytokines are involved. Supplementary Table 10. Colocalization analysis. Supplementary Table 11a. Secondary cytokines associated with selected instruments, based on the gwas included in the study. Supplementary Table 11b. Secondary traits associated with selected instruments, based on a phenoscanner search. Supplementary Table 12a. Sensitivity analyses excluding potentially pleiotropic genetic variants. Supplementary Table 12b. Sensitivity analyses accounting for LD among genetic variants. Supplementary Table 13. Replication of the significant associations in the UK Biobank. [file 12916_2021_2193_MOESM2_ESM.xlsx]

## Sheet: Supplementary Tables
Supplementary Table 1. Sources of GX instruments per cytokine & genetic locus of cytokine.
Supplementary Table 2. Genetic association estimates that were used in the MR analyses.
Supplementary Table 3. Sources of GY instruments per cancer outcome.
Supplementary Table 4. Genetic association estimates that were used in the MR analyses.
Supplementary Table 5. Summary of the MR results based on the cis-pQTL instrument definition.
Supplementary Table 6. Summary of the MR results based on the cis-eQTL instrument definition.
Supplementary Table 7. Identification of druggable targets using publicly available repositories.
Supplementary Table 8. Summary of epidemiological evidence linking prediagnostic cytokine concentrations to cancer risk.
Supplementary Table 9. KeGG pathways in which significant cytokines are involved.
Supplementary Table 10. Colocalization analysis.
Supplementary Table 11a. Secondary cytokines associated with selected instruments, based on the gwas included in the study.
Supplementary Table 11b. Secondary traits associated with selected instruments, based on a phenoscanner search.
Supplementary Table 12a. Sensitivity analyses excluding potentially pleiotropic genetic variants.
Supplementary Table 12b. Sensitivity analyses accounting for LD among genetic variants.
Supplementary Table 13. Replication of the significant associations in the UK Biobank.

## Sheet: S1. Source of GX
Supplementary Table 1
cytokine	Gene name	Gene ensemble	Chr	Chrom_start_hg19	Chrom_end_hg19	Source of GWAS	GWAS sample size
MCP3	CCL7	ENSG00000108688	17	32597235	32599261	Sun	3301
TNF-B	LTA	ENSG00000226979	6	31539876	31542100	Sun	3301
IL-5*	IL5	ENSG00000113525	5	131877136	131879214	Finnish	3364
IL-7	IL7	ENSG00000104432	8	79645007	79717758	Finnish	3409
RANTES	CCL5	ENSG00000271503	17	34198496	34207377	Finnish	3421
IL-2*	IL2	ENSG00000109471	4	123372626	123377650	Finnish	3475
MIF	MIF	ENSG00000240972	22	24236565	24237409	Finnish	3494
bNGF	NGF	ENSG00000134259	1	115828537	115880857	Finnish	3531
IL-13*	IL13	ENSG00000169194	5	131993865	131996801	Finnish	3557
CTACK	CCL27	ENSG00000213927	9	34661893	34662689	Finnish	3631
IL-9*	IL9	ENSG00000145839	5	135227935	135231516	Finnish	3634
MIG	CXCL9	ENSG00000138755	4	76922623	76928641	Finnish	3685
IL-1a	IL1A	ENSG00000115008	2	113531492	113542971	Finnish	5014
activePAI	SERPINE1	ENSG00000106366	7	100770370	100782547	Finnish	5199
sICAM	ICAM1	ENSG00000090339	19	10381517	10397291	Finnish	5199
sVCAM	VCAM1	ENSG00000162692	1	101185196	101204601	Finnish	5199
SDF1a*	CXCL12	ENSG00000107562	10	44872510	44880545	Finnish	5998
GROa	CXCL1	ENSG00000163739	4	74735109	74737019	Finnish + Sun	6806
SCGFb	CLEC11A	ENSG00000105472	19	51226605	51228981	Finnish + Sun	6983
FGFBasic	FGF2	ENSG00000138685	4	123747863	123819390	Finnish	7565
IL-10*	IL10	ENSG00000136634	1	206940948	206945839	Finnish	7681
IFNg*	IFNG	ENSG00000111537	12	68548550	68553521	Finnish	7701
GCSF*	CSF3	ENSG00000108342	17	38171614	38174066	Finnish	7904
IL12p70	IL12A	ENSG00000168811	3	159706623	159713806	Finnish	8270
IL12p70	IL12B	ENSG00000113302	5	158741791	158757481	Finnish	8270
IL-1b*	IL1B	ENSG00000125538	2	113587337	113594356	Finnish	8376
TNF-A	TNF	ENSG00000232810	6	31543344	31546112	Finnish	8522
IL-1ra	IL1RN	ENSG00000136689	2	113885138	113891593	SCALLOP	17747
IP-10	CXCL10	ENSG00000169245	4	76942269	76944689	Finnish	8757
Eotaxin	CCL11	ENSG00000172156	17	32612687	32615199	Finnish + Sun	11454
IL-17*	IL17A	ENSG00000112115	6	52051185	52055436	Finnish	12831
IL-4*	IL4	ENSG00000113520	5	132009678	132018370	Finnish	13183
IL-2ra	IL2RA	ENSG00000134460	10	6052657	6104333	Finnish	3677
IL-6	IL6	ENSG00000136244	7	22766766	22771621	SCALLOP	17747
IL-8	CXCL8	ENSG00000169429	4	74606223	74609433	SCALLOP	17747
MCSF	CSF1	ENSG00000184371	1	110453233	110473616	SCALLOP	17747
MIP1a	CCL3	ENSG00000277632	17	34415603	34417506	SCALLOP	17747
PDGFbb	PDGFB	ENSG00000100311	22	39619685	39640957	SCALLOP	17747
sCD40L*	CD40LG	ENSG00000102245	X	135730336	135742549	SCALLOP	17747
SCF	KITLG	ENSG00000049130	12	88886570	88974250	SCALLOP	17747
IL-16	IL16	ENSG00000172349	15	81517640	81605104	Finnish + SCALLOP	21230
IL-18	IL18	ENSG00000150782	11	112013974	112034840	Finnish + SCALLOP	21383
SeSelectin	SELE	ENSG00000007908	1	169691781	169703220	Finnish + SCALLOP†	22946
TRAIL	TNFSF10	ENSG00000121858	3	172223298	172241297	Finnish + SCALLOP	25933
MIP1b	CCL4	ENSG00000275302	17	34431220	34433014	Finnish + SCALLOP	25990
HGF	HGF	ENSG00000019991	7	81331444	81399452	Finnish + SCALLOP	26039
VEGF	VEGFA	ENSG00000112715	6	43737946	43754223	Finnish + SCALLOP	29902
MCP1	CCL2	ENSG00000108691	17	32582296	32584220	Finnish + SCALLOP	31112
*No instruments were found based using either pQTL eQTL definition.
†Based on the eQTL definition no instruments were available from the Finnish + SCALLOP meta-analysis, hence data from the Finnish + Sun meta-analysis were used (n=8,500).

## Sheet: S2. GX Instruments
Supplementary Table 2
Cytokine	rsid	chr_name	chrom_start	EA_exposure	NEA_exposure	BETA_exposure	SE_exposure	P	R2	Fstat	instr
activePAI	rs62465622	7	101015523	C	T	-0.106115	0.026271	5.36223e-05	0.00312789	16.3067	pQTL
CTACK	rs75842242	9	34587241	C	A	0.1724	0.0409	2.465e-05	0.00390589	14.2301	pQTL
CTACK	rs867811	9	34663798	C	T	-0.1853	0.0258	7.446e-13	0.0134615	49.5185	pQTL
CTACK	rs2070074	9	34649442	G	A	-0.4402	0.0372	2.316e-32	0.042755	162.088	pQTL
Eotaxin	rs4471731	17	32556165	A	G	0.0627	0.0157	6.655e-05	0.00181329	20.8036	pQTL
Eotaxin	rs9675315	17	32541260	T	C	0.064	0.0156	4.225e-05	0.00202777	23.2691	pQTL
Eotaxin	rs28481802	17	32676872	A	G	0.0811	0.0175	3.653e-06	0.00259515	29.797	pQTL
Eotaxin	rs1860189	17	32578358	A	G	0.1014	0.0203	5.675e-07	0.00288798	33.1689	pQTL
Eotaxin	rs77569276	17	32534568	C	G	0.1008	0.0204	7.32e-07	0.00297202	34.137	pQTL
Eotaxin	rs12450911	17	32604425	A	G	0.1027	0.0202	3.587e-07	0.00299035	34.3482	pQTL
GROa	rs11724468	4	75086421	A	G	-0.0926	0.022	2.462e-05	0.00331923	22.6592	pQTL
GROa	rs75495477	4	74455628	A	G	-0.1704	0.0363	2.609e-06	0.00376052	25.6832	pQTL
GROa	rs34700776	4	74527305	T	G	0.092	0.0198	3.375e-06	0.00401084	27.3997	pQTL
GROa	rs6853814	4	74811622	T	C	-0.1399	0.0301	3.432e-06	0.004023	27.4831	pQTL
GROa	rs79320966	4	74988426	A	C	0.2012	0.0419	1.541e-06	0.00425845	29.0984	pQTL
GROa	rs3775488	4	74862852	T	C	-0.1014	0.0226	7.225e-06	0.00452552	30.9316	pQTL
GROa	rs6815457	4	74714003	A	G	-0.1577	0.0216	3.046e-13	0.00895755	61.4981	pQTL
GROa	rs17202249	4	74617243	T	C	0.2445	0.0554	1.038e-05	0.010124	69.5879	pQTL
GROa	rs34858592	4	74749301	A	G	0.2162	0.0346	3.901e-10	0.0114633	78.901	pQTL
GROa	rs72855280	4	74835131	A	C	0.8259	0.0443	1.232e-77	0.0871656	649.707	pQTL
GROa	rs1366949	4	74739076	T	G	-0.6282	0.0221	9.34e-178	0.130803	1023.91	pQTL
HGF	rs10239816	7	81821760	T	G	-0.0049	0.001	1.514e-06	2.48301e-06	0.0287807	pQTL
HGF	rs145168020	7	81853772	T	C	-0.0075	0.0016	1.841e-06	5.81714e-06	0.0674269	pQTL
HGF	rs73149798	7	80982822	A	T	-0.0099	0.0001	0	9.43435e-06	0.109355	pQTL
HGF	rs2967922	7	81048444	A	G	-0.0112	0.0007	1.148e-61	1.49412e-05	0.173186	pQTL
HGF	rs7788796	7	81129093	T	C	-0.0163	0	0	3.07167e-05	0.356048	pQTL
HGF	rs5745687	7	81359051	T	C	-0.3008	0.0405	1.086e-13	0.00967873	113.283	pQTL
IL12p70	rs34740816	3	159965219	G	A	-0.1164	0.0296	8.173e-05	0.00154277	NA	pQTL
IL-16	rs7170924	15	81583139	T	G	0.0237	0.0051	4.071e-06	0.000213139	4.52547	pQTL
IL-16	rs12913587	15	81836114	A	G	-0.0221	0.0051	1.699e-05	0.000237557	5.04405	pQTL
IL-16	rs1848707	15	81421792	A	G	-0.0239	0.0047	3.058e-07	0.000260208	5.52513	pQTL
IL-16	rs1482937	15	81811499	C	G	-0.0283	0.006	2.793e-06	0.000275493	5.84977	pQTL
IL-16	rs75194383	15	81664543	T	G	0.0528	0.0126	2.717e-05	0.000307588	6.53149	pQTL
IL-16	rs7179124	15	81960730	C	G	-0.027	0.005	5.77e-08	0.000323349	6.86628	pQTL
IL-16	rs6495562	15	81612117	T	C	-0.0613	0.0108	1.429e-08	0.00039529	8.39454	pQTL
IL-16	rs116947254	15	81786092	A	G	-0.0571	0.0123	3.265e-06	0.000399704	8.48832	pQTL
IL-16	rs35000575	15	81439638	A	C	-0.0451	0.0076	3.765e-09	0.000451632	9.59158	pQTL
IL-16	rs4611404	15	81613766	T	C	-0.0681	0.0118	8.639e-09	0.000454737	9.65755	pQTL
IL-16	rs58484457	15	81769674	T	C	0.035	0.0048	2.471e-13	0.000496386	10.5425	pQTL
IL-16	rs35254208	15	81481945	A	T	-0.0407	0.0077	1.386e-07	0.00050139	10.6489	pQTL
IL-16	rs4128767	15	81543407	A	G	-0.0506	0.0047	2.122e-27	0.00112515	23.9115	pQTL
IL-16	rs4778893	15	81611253	A	G	-0.0629	0.0067	3.93e-21	0.00121238	25.7676	pQTL
IL-16	rs55889255	15	81516565	A	G	0.1032	0.0091	5.429e-30	0.00166548	35.4138	pQTL
IL-16	rs75824993	15	81494541	A	C	-0.1077	0.0092	8.973e-32	0.00173659	36.9285	pQTL
IL-16	rs3848180	15	81596590	T	G	0.0991	0.0041	1.1e-129	0.00486189	103.712	pQTL
IL-16	rs4778890	15	81589648	C	G	0.448	0.0089	0	0.0218248	473.635	pQTL
IL-18	rs76785871	11	112387246	A	G	-0.1489	0.0369	5.455e-05	0.00331937	23.0965	pQTL
IL-18	rs10789893	11	112391048	T	C	0.1132	0.0247	4.584e-06	0.00545446	38.0342	pQTL
IL-18	rs55772679	11	112235908	T	C	-0.1337	0.0239	2.217e-08	0.00886641	62.0386	pQTL
IL-18	rs1534115	11	112210999	A	G	-0.1485	0.0251	3.292e-09	0.00992371	69.5107	pQTL
IL-18	rs71478720	11	112009605	T	C	-0.26	0.0273	1.669e-21	0.0230255	163.445	pQTL
IL-1ra	rs9308676	2	113428167	A	G	0.0431	0.0109	7.427e-05	0.000917526	17.4995	pQTL
IL-1ra	rs7594852	2	113521754	T	C	0.0449	0.0103	1.252e-05	0.00100614	19.1913	pQTL
IL-1ra	rs45592842	2	113943063	T	G	0.0946	0.023	3.801e-05	0.00140688	20.8075	pQTL
IL-1ra	rs3783548	2	113533333	A	G	0.086	0.0207	3.353e-05	0.0012849	20.9632	pQTL
IL-1ra	rs62157451	2	113608418	C	G	-0.0956	0.0226	2.259e-05	0.00115369	20.9787	pQTL
IL-1ra	rs6723639	2	113872238	T	C	-0.0655	0.0133	7.832e-07	0.00140699	26.8478	pQTL
IL-1ra	rs72831808	2	113979355	C	G	0.1235	0.0252	9.727e-07	0.0017285	27.117	pQTL
IL-1ra	rs3977064	2	114191728	A	C	-0.1035	0.0243	2.065e-05	0.00197943	29.292	pQTL
IL-1ra	rs1191686	2	114094703	T	C	-0.072	0.0131	4.311e-08	0.00157496	30.0093	pQTL
IL-1ra	rs1867868	2	114162983	T	C	0.0634	0.0106	2.24e-09	0.00200908	36.5645	pQTL
IL-1ra	rs4591347	2	113658705	T	C	-0.1005	0.0149	1.744e-11	0.00236039	45.0836	pQTL
IL-1ra	rs1491585	2	114003621	A	G	-0.0752	0.0107	1.954e-12	0.00282022	53.8911	pQTL
IL-1ra	rs7584409	2	113742734	A	G	-0.0861	0.0116	9.5e-14	0.00304087	55.3999	pQTL
IL-1ra	rs114189538	2	113821082	A	G	-0.1666	0.0222	6.22e-14	0.00342193	65.4287	pQTL
IL-1ra	rs74667587	2	113895079	A	G	-0.1494	0.0141	2.694e-26	0.0066061	126.716	pQTL
IL-1ra	rs72829856	2	113913287	A	G	0.2125	0.0196	2.982e-27	0.00778655	142.537	pQTL
IL-1ra	rs6743376	2	113832333	A	C	-0.1822	0.0107	3.473e-65	0.0151598	293.317	pQTL
IL-1ra	rs6734238	2	113841030	A	G	0.204	0.0104	2.459e-85	0.0197602	384.119	pQTL
IL-2ra	rs3136613	10	6020749	C	T	0.0959	0.024	6.444e-05	0.00417615	15.4117	pQTL
IL-2ra	rs7084255	10	6184167	T	A	0.1339	0.0304	1.049e-05	0.00521816	19.2773	pQTL
IL-2ra	rs4747891	10	6188119	G	C	0.1799	0.0375	1.585e-06	0.00561524	20.7526	pQTL
IL-2ra	rs7077067	10	6132692	C	T	0.1109	0.024	3.719e-06	0.00594612	21.9827	pQTL
IL-2ra	rs676063	10	5986900	G	T	0.1462	0.0354	3.663e-05	0.00608018	22.4814	pQTL
IL-2ra	rs7898286	10	6009462	G	T	-0.1186	0.0252	2.513e-06	0.00658449	24.3584	pQTL
IL-2ra	rs2182409	10	6209218	C	T	-0.1201	0.0249	1.463e-06	0.00685586	25.3692	pQTL
IL-2ra	rs3136614	10	6005674	G	A	0.1652	0.0363	5.304e-06	0.00811964	30.084	pQTL
IL-2ra	rs9423654	10	5605334	G	C	0.1351	0.0283	1.743e-06	0.00834292	30.9182	pQTL
IL-2ra	rs17403348	10	5827901	C	T	0.3336	0.0805	3.445e-05	0.012672	47.1674	pQTL
IL-2ra	rs140148883	10	5795575	G	A	-0.4024	0.0937	1.755e-05	0.0155301	57.9734	pQTL
IL-2ra	rs12722588	10	6060433	C	T	0.3344	0.0334	1.561e-23	0.0255114	96.2087	pQTL
IL-2ra	rs34507893	10	6124598	G	A	-0.7351	0.1155	1.997e-10	0.0567057	220.921	pQTL
IL-2ra	rs12722497	10	6095928	C	A	-0.6285	0.0482	6.941e-39	0.0930403	376.999	pQTL
IL-6	rs57349960	7	22519455	CG	C	0.0613	0.0153	6.276e-05	0.0017884	16.0849	pQTL
IL-7	rs6473130	8	79862570	C	A	-0.0978	0.0251	9.703e-05	0.00469995	16.0884	pQTL
IL-8	rs7655660	4	74589597	A	G	-0.1876	0.0237	2.666e-15	0.00447912	71.8668	pQTL
IP-10	rs4512021	4	76954407	A	G	-0.0769	0.0152	4.21e-07	0.00295409	25.9397	pQTL
IP-10	rs12508444	4	76750708	T	C	-0.0836	0.0172	1.171e-06	0.0030324	26.6294	pQTL
IP-10	rs76467436	4	76677445	A	G	-0.1723	0.033	1.778e-07	0.00338037	29.6955	pQTL
IP-10	rs13141895	4	77077885	T	C	-0.1142	0.022	2.093e-07	0.00370983	32.6005	pQTL
IP-10	rs144775225	4	76666780	T	C	-0.2319	0.0533	1.356e-05	0.00659806	58.1497	pQTL
MCP1	rs1948336	17	32178164	A	G	0.0005	0	5.52e-300	3.10822e-08	0.000517954	pQTL
MCP1	rs8070924	17	33078801	A	G	0.0087	0.0013	3.196e-11	7.82754e-06	0.130439	pQTL
MCP1	rs34380334	17	32141825	T	G	0.0107	0.0008	1.283e-36	1.12262e-05	0.187076	pQTL
MCP1	rs295092	17	32790414	C	G	-0.0153	0.0019	2.286e-16	2.66524e-05	0.444147	pQTL
MCP1	rs74602403	17	32897155	C	G	-0.0172	0.003	6.881e-09	2.95383e-05	0.49224	pQTL
MCP1	rs112623849	17	32190928	T	G	-0.0132	0.003	9.177e-06	3.36531e-05	0.560814	pQTL
MCP1	rs117361374	17	32738412	A	C	-0.0192	0.0011	1.236e-65	3.54849e-05	0.591342	pQTL
MCP1	rs1897352	17	32654769	T	G	-0.0127	0.0006	1.24e-110	3.79514e-05	0.632446	pQTL
MCP1	rs9303671	17	32368584	T	C	-0.017	0.0003	0	4.18112e-05	0.696771	pQTL
MCP1	rs56079229	17	32273332	T	G	0.0141	0	0	4.32807e-05	0.721262	pQTL
MCP1	rs78914963	17	32340667	A	G	-0.0192	0.0019	6.145e-25	4.58326e-05	0.763789	pQTL
MCP1	rs62057446	17	32291020	T	C	-0.0232	0.0032	7.817e-13	5.27767e-05	0.879517	pQTL
MCP1	rs62056820	17	32326550	T	C	-0.0244	0.0029	1.717e-17	6.88301e-05	1.14706	pQTL
MCP1	rs28375266	17	32987906	T	G	-0.0177	0.0007	7.3e-158	7.72794e-05	1.28788	pQTL
MCP1	rs75928340	17	32498342	T	C	-0.0295	0.0045	6.994e-11	8.99976e-05	1.49986	pQTL
MCP1	rs57487960	17	32945513	A	G	-0.0288	0	0	9.44361e-05	1.57383	pQTL
MCP1	rs55997736	17	32560384	A	G	-0.0202	0.0002	0	0.00010181	1.69673	pQTL
MCP1	rs117419795	17	32110444	A	G	-0.0318	0.0079	5.495e-05	0.000111572	1.85945	pQTL
MCP1	rs113754751	17	32415739	T	C	0.0293	0.0055	1.007e-07	0.000115603	1.92663	pQTL
MCP1	rs112255380	17	32560344	A	G	-0.0201	0.0013	3.013e-53	0.000116658	1.94421	pQTL
MCP1	rs78795737	17	32373800	T	C	-0.0348	0.0071	1.092e-06	0.000148465	2.47439	pQTL
MCP1	rs377320754	17	32361918	T	G	-0.0325	0.0002	0	0.000190801	3.18011	pQTL
MCP1	rs78092660	17	32177034	A	G	-0.0248	0.0034	6.239e-13	0.000212249	3.53767	pQTL
MCP1	rs532378821	17	32624247	T	C	-0.0457	0.0043	1.021e-26	0.000281233	4.68778	pQTL
MCP1	rs79616298	17	32554331	T	C	-0.0358	0.0017	5.31e-101	0.000295951	4.93318	pQTL
MCP1	rs59757453	17	32912644	C	G	-0.057	0.0067	1.421e-17	0.000508077	8.4709	pQTL
MCP1	rs1594542	17	32654317	A	T	-0.0537	0.0131	4.386e-05	0.00132686	22.1401	pQTL
MCP1	rs12601658	17	32533423	A	T	-0.0741	0.0152	1.177e-06	0.00196605	32.8268	pQTL
MCP3	rs12600832	17	32679760	T	G	-0.2036	0.0504	5.37032e-05	0.00557384	18.4912	pQTL
MCP3	rs10512462	17	32499059	A	G	0.2047	0.0467	1.1749e-05	0.00640099	21.2529	pQTL
MCP3	rs117940142	17	32527035	A	C	0.2196	0.0483	5.49541e-06	0.00646558	21.4688	pQTL
MCP3	rs371194085	17	32619468	A	T	-0.1282	0.0269	1.8197e-06	0.00778291	25.8772	pQTL
MCP3	rs2079662	17	32501275	T	C	-0.2509	0.0413	1.25893e-09	0.0114448	38.1935	pQTL
MCP3	rs61578494	17	32535620	C	G	-0.3664	0.0509	6.0256e-13	0.015895	53.2845	pQTL
MCP3	rs16969376	17	32561165	A	G	-0.4236	0.0513	1.51356e-16	0.0203159	68.4122	pQTL
MCP3	rs16969377	17	32561182	A	G	-0.43	0.052	1.38038e-16	0.0205153	69.0974	pQTL
MCP3	rs2005314	17	32498797	T	C	0.2482	0.0313	1.99526e-15	0.0219933	74.1876	pQTL
MCP3	rs1029719	17	32550864	T	C	0.2134	0.025	1.41254e-17	0.0220071	74.235	pQTL
MCP3	rs560964485	17	32554384	T	C	-0.3674	0.0443	1.04713e-16	0.0272134	92.2885	pQTL
MCP3	rs408121	17	32677148	A	G	0.262	0.027	2.81838e-22	0.031327	106.69	pQTL
MCP3	rs1133763	17	32647831	A	C	0.5878	0.0328	7.07946e-72	0.0920436	334.434	pQTL
MCSF	rs12401850	1	110437378	A	G	0.056	0.013	1.771e-05	0.00140924	22.5415	pQTL
MCSF	rs140223635	1	110543879	A	G	-0.1095	0.0259	2.432e-05	0.00183917	23.1775	pQTL
MCSF	rs72687271	1	110491364	A	G	-0.1086	0.0251	1.481e-05	0.0018989	23.9317	pQTL
MCSF	rs6699144	1	110438926	T	C	0.0603	0.0131	4.112e-06	0.00156238	24.995	pQTL
MCSF	rs6695237	1	110415626	A	G	-0.0602	0.0118	3.346e-07	0.00179621	28.7425	pQTL
MCSF	rs116675658	1	110613543	T	G	-0.1261	0.0272	3.678e-06	0.00169532	28.7521	pQTL
MCSF	rs72974777	1	110462488	A	G	0.1328	0.0265	5.143e-07	0.00217123	36.841	pQTL
MCSF	rs17668350	1	110543223	T	C	-0.1455	0.022	3.889e-11	0.00280726	47.6635	pQTL
MCSF	rs672992	1	110639873	T	C	0.0803	0.0118	8.643e-12	0.00318713	54.1339	pQTL
MCSF	rs3768471	1	110612436	A	G	0.17	0.0229	1.092e-13	0.0041079	69.8378	pQTL
MCSF	rs333968	1	110460520	T	C	-0.1406	0.0183	1.514e-14	0.00417808	71.0359	pQTL
MCSF	rs1058885	1	110466466	T	C	-0.1262	0.0114	2.889e-28	0.00729904	124.489	pQTL
MCSF	rs11579145	1	110501597	A	G	-0.1754	0.0111	7.307e-56	0.0153613	249.194	pQTL
MIF	rs2739327	22	24334023	T	A	-0.1255	0.03	2.885e-05	0.0077779	27.3733	pQTL
MIF	rs2330634	22	24250795	G	C	-0.1549	0.0248	4.498e-10	0.011232	39.6676	pQTL
MIG	rs55876513	4	76883698	G	T	-0.1638	0.0254	1.048e-10	0.0111143	41.3941	pQTL
MIP1a	rs143357708	17	34909948	A	G	-0.0879	0.0226	9.976e-05	0.00088105	16.8041	pQTL
MIP1a	rs7208788	17	34823204	A	G	-0.0587	0.015	8.932e-05	0.000972828	17.7557	pQTL
MIP1a	rs1127790	17	34304247	A	G	0.0825	0.0185	8.06e-06	0.00123491	22.5453	pQTL
MIP1a	rs112689088	17	34307457	T	C	0.089	0.0189	2.642e-06	0.00133887	24.4455	pQTL
MIP1a	rs41389847	17	34324617	T	C	0.1143	0.0239	1.772e-06	0.00132545	25.2912	pQTL
MIP1a	rs868340	17	34832620	A	T	-0.0569	0.0106	7.092e-08	0.0016127	29.453	pQTL
MIP1a	rs571801759	17	34422876	T	C	-0.1525	0.0332	4.436e-06	0.00398761	33.638	pQTL
MIP1a	rs2282674	17	34524523	A	G	0.0781	0.019	3.961e-05	0.00266372	34.6455	pQTL
MIP1a	rs854675	17	34359900	T	C	-0.1007	0.0181	2.463e-08	0.00196967	35.9856	pQTL
MIP1a	rs1542611	17	34848436	T	G	-0.1047	0.0178	3.765e-09	0.0019433	37.1036	pQTL
MIP1a	rs16972027	17	34451097	A	G	0.1312	0.0232	1.674e-08	0.0028562	42.5069	pQTL
MIP1a	rs4795113	17	34478464	C	G	-0.1031	0.0195	1.324e-07	0.00336431	50.0942	pQTL
MIP1a	rs66967287	17	34352005	T	C	-0.1222	0.0178	7.601e-12	0.00266638	50.9462	pQTL
MIP1a	rs41356845	17	34325248	C	G	-0.121	0.0162	7.916e-14	0.00296889	56.7437	pQTL
MIP1a	rs2735835	17	34393296	A	G	0.0806	0.0108	1.025e-13	0.00324082	59.2843	pQTL
MIP1a	rs4796155	17	34445646	A	T	0.0971	0.0166	4.574e-09	0.004267	59.7445	pQTL
MIP1a	rs67943086	17	34357820	A	G	0.1319	0.0185	8.954e-13	0.00344708	63.0712	pQTL
MIP1a	rs854658	17	34352666	A	G	0.0816	0.0105	7.92e-15	0.00330303	63.1504	pQTL
MIP1a	rs16971993	17	34445397	T	C	0.1617	0.0241	1.841e-11	0.00458468	68.3491	pQTL
MIP1a	rs117010890	17	34916971	T	C	-0.2113	0.0281	6.12e-14	0.00534915	79.8083	pQTL
MIP1a	rs854660	17	34354803	A	G	-0.0989	0.0106	1.148e-20	0.00488853	89.5744	pQTL
MIP1a	rs56121841	17	34363587	T	G	-0.1113	0.0118	4.466e-21	0.00516986	94.756	pQTL
MIP1a	rs9911791	17	34820996	A	G	0.1338	0.0145	3.143e-20	0.00537589	98.5532	pQTL
MIP1a	rs4796217	17	34819191	T	C	0.1169	0.0119	7.569e-23	0.0060733	106.278	pQTL
MIP1a	rs1018913	17	34464074	C	G	-0.1616	0.0204	2.6e-15	0.0129976	110.644	pQTL
MIP1a	rs8082120	17	34445325	A	G	-0.1413	0.015	3.959e-21	0.00828996	124.049	pQTL
MIP1a	rs2840162	17	34392547	A	G	0.1935	0.0174	1.181e-28	0.00693648	133.104	pQTL
MIP1a	rs11651338	17	34816489	T	C	0.1221	0.0116	9.999e-26	0.00725225	133.201	pQTL
MIP1a	rs62079697	17	34393028	T	C	0.1934	0.0174	1.231e-28	0.00700635	134.454	pQTL
MIP1a	rs7213887	17	34439230	A	G	-0.2131	0.024	7.983e-19	0.0105262	137.996	pQTL
MIP1a	rs854462	17	34386090	A	G	0.1736	0.015	5.09e-31	0.00745962	143.218	pQTL
MIP1a	rs62081560	17	34442541	T	G	0.1688	0.0139	4.386e-34	0.0103468	190.635	pQTL
MIP1a	rs12948732	17	34462907	T	C	-0.2155	0.018	5.12e-33	0.0113029	208.451	pQTL
MIP1a	rs1634517	17	34432403	A	C	0.4013	0.0117	2.05e-258	0.0589819	1194.4	pQTL
MIP1b	rs854658	17	34352666	A	G	-0.0338	0.0077	1.142e-05	0.000565347	6.52892	pQTL
MIP1b	rs62079736	17	34429752	A	G	0.0625	0.0149	2.617e-05	0.00071186	8.22214	pQTL
MIP1b	rs8076004	17	34401669	A	C	-0.0454	0.0091	6.762e-07	0.00079786	9.21625	pQTL
MIP1b	rs117086316	17	34070299	A	G	-0.078	0.0186	2.69e-05	0.000921042	10.6405	pQTL
MIP1b	rs1005107	17	34340592	T	C	-0.0854	0.0161	1.218e-07	0.00132908	15.3606	pQTL
MIP1b	rs62078170	17	34110979	T	G	-0.0773	0.0148	1.924e-07	0.00151616	17.5261	pQTL
MIP1b	rs79010839	17	34901949	T	C	0.1154	0.0195	3.017e-09	0.00156293	18.0676	pQTL
MIP1b	rs719828	17	34465375	A	G	0.0884	0.0178	7.056e-07	0.001654	19.1221	pQTL
MIP1b	rs854633	17	34374462	T	C	-0.0627	0.0083	5.485e-14	0.00183236	21.1879	pQTL
MIP1b	rs11657788	17	34273139	A	C	-0.1118	0.016	2.751e-12	0.00197532	22.8443	pQTL
MIP1b	rs8075916	17	34343845	A	C	-0.0809	0.0111	2.495e-13	0.00198921	23.0052	pQTL
MIP1b	rs8064395	17	34272942	A	C	-0.1074	0.0141	3.248e-14	0.00204667	23.6711	pQTL
MIP1b	rs1634503	17	34421139	A	G	-0.0752	0.0097	9.538e-15	0.00216242	25.0127	pQTL
MIP1b	rs8074386	17	34452725	T	C	-0.0881	0.0139	2.274e-10	0.00224116	25.9256	pQTL
MIP1b	rs60516659	17	34403297	A	G	0.1199	0.0149	7.359e-16	0.00236657	27.3798	pQTL
MIP1b	rs7222922	17	34335694	T	C	0.1129	0.014	8.423e-16	0.0028492	32.9794	pQTL
MIP1b	rs4795105	17	34287751	A	T	-0.1056	0.0121	2.283e-18	0.00305779	35.4013	pQTL
MIP1b	rs62079582	17	34813754	A	G	0.0905	0.0207	1.213e-05	0.00340808	39.4705	pQTL
MIP1b	rs2376468	17	34461903	C	G	-0.1164	0.0139	4.584e-17	0.00479318	55.5894	pQTL
MIP1b	rs117010890	17	34916971	T	C	-0.2044	0.0259	3.172e-15	0.00555444	64.4674	pQTL
MIP1b	rs12600678	17	34478231	T	C	0.1839	0.0206	3.716e-19	0.00695149	80.7958	pQTL
MIP1b	rs187348776	17	34535622	A	T	0.1678	0.028	2.006e-09	0.00726253	84.4373	pQTL
MIP1b	rs4795112	17	34471404	T	G	0.1654	0.024	5.595e-12	0.0074278	86.3732	pQTL
MIP1b	rs868340	17	34832620	A	T	-0.148	0.0078	3.551e-80	0.0107858	125.847	pQTL
MIP1b	rs200975376	17	34539235	A	G	0.2137	0.0354	1.556e-09	0.0113945	133.031	pQTL
MIP1b	rs8064426	17	34819750	A	G	-0.4523	0.0116	0	0.0601021	738.057	pQTL
PDGFbb	rs5757272	22	39157384	A	G	-0.0448	0.0113	7.827e-05	0.00099732	18.2061	pQTL
RANTES	rs2251660	17	34252537	C	A	-0.1831	0.0356	2.617e-07	0.00908519	31.3471	pQTL
SCF	rs78628275	12	89078733	T	C	-0.1097	0.0264	3.325e-05	0.00132137	20.9159	pQTL
SCF	rs11608458	12	89369806	T	C	-0.0698	0.012	5.941e-09	0.00223565	33.2578	pQTL
SCF	rs11105125	12	89376538	T	C	-0.0657	0.0116	1.379e-08	0.00199288	36.4168	pQTL
SCGFb	rs35886564	19	51283589	T	C	-0.1064	0.0248	1.763e-05	0.00543677	38.1616	pQTL
SCGFb	rs62112533	19	51233758	T	C	-0.169	0.028	1.541e-09	0.0106674	75.2721	pQTL
SeSelectin	rs60425295	1	169716281	T	C	0.1036	0.0252	3.904e-05	0.00252546	58.0908	pQTL
SeSelectin	rs3917412	1	169700502	T	C	0.1154	0.0219	1.309e-07	0.00538467	124.215	pQTL
sICAM	rs57547494	19	10852417	T	C	0.143139	0.035912	6.72476e-05	0.00196505	10.2325	pQTL
sICAM	rs78301903	19	10866888	C	T	0.143618	0.0362574	7.46212e-05	0.00197822	10.3012	pQTL
sICAM	rs62131898	19	10626428	G	A	0.125113	0.026848	3.16149e-06	0.00345376	18.0114	pQTL
sICAM	rs62130043	19	10821054	G	A	0.08631	0.0211143	4.35576e-05	0.00348719	18.1863	pQTL
sICAM	rs74827019	19	10403603	T	C	0.175694	0.0418966	2.74658e-05	0.00351486	18.3312	pQTL
sICAM	rs78256348	19	10691307	T	C	0.100112	0.0227409	1.0711e-05	0.00352027	18.3595	pQTL
sICAM	rs139790375	19	10126107	T	C	0.116598	0.0241107	1.32497e-06	0.00359055	18.7273	pQTL
sICAM	rs7250419	19	10127126	G	A	0.101663	0.0259336	8.85026e-05	0.00363019	18.9349	pQTL
sICAM	rs112917725	19	10232339	T	C	0.164622	0.0359541	4.67937e-06	0.00379505	19.798	pQTL
sICAM	rs34196120	19	10117420	C	T	0.0926816	0.0196463	2.38747e-06	0.00428398	22.3597	pQTL
sICAM	rs1988068	19	10330012	A	G	-0.113357	0.0231625	9.88054e-07	0.00471985	24.6454	pQTL
sICAM	rs73013009	19	10240241	A	T	0.19889	0.0457812	1.39681e-05	0.00485334	25.3458	pQTL
sICAM	rs142673551	19	9935851	T	C	-0.226381	0.0433623	1.78268e-07	0.00583545	30.5048	pQTL
sICAM	rs11085580	19	10214589	A	T	0.137165	0.0249664	3.93e-08	0.00650368	34.0209	pQTL
sICAM	rs5030347	19	10384604	A	C	-0.142505	0.0245329	6.2945e-09	0.00654752	34.2517	pQTL
sICAM	rs8111930	19	10368050	G	A	-0.254171	0.0348531	3.03953e-13	0.00792628	41.522	pQTL
sICAM	rs112023341	19	10696691	A	G	-0.246806	0.0412114	2.1143e-09	0.00800492	41.9373	pQTL
sICAM	rs78671428	19	10707400	T	G	-0.256405	0.0418746	9.17298e-10	0.00806618	42.2608	pQTL
sICAM	rs5498	19	10395683	G	A	0.127405	0.0196515	8.97877e-11	0.00810277	42.4541	pQTL
sICAM	rs5030390	19	10382537	A	G	-0.293513	0.045307	9.27598e-11	0.00826252	43.2981	pQTL
sICAM	rs7256672	19	10579474	G	T	-0.145997	0.0215102	1.14223e-11	0.010178	53.4391	pQTL
sICAM	rs56114795	19	10868545	T	C	-0.299694	0.0487263	7.72097e-10	0.0110197	57.9077	pQTL
sICAM	rs7252897	19	10540971	T	C	0.211309	0.0244408	5.3449e-18	0.0129955	68.4267	pQTL
sICAM	rs12720234	19	10482859	T	C	-0.345475	0.0463189	8.74334e-14	0.0135902	71.6016	pQTL
sICAM	rs117063573	19	10835620	A	G	-0.434287	0.0576726	5.06575e-14	0.0180889	95.7397	pQTL
sVCAM	rs3917010	1	101190866	C	A	-0.0984083	0.0231502	2.12942e-05	0.00300377	15.6576	pQTL
TNF-A	rs2429642	6	31486962	A	G	-0.0765	0.0194	8.037e-05	0.00162563	13.8729	pQTL
TNF-A	rs115497794	6	31328974	A	G	0.1263	0.0291	1.423e-05	0.00276766	23.6459	pQTL
TRAIL	rs557107565	3	172656623	A	C	-0.0036	0.0001	0	3.93902e-06	0.0452398	pQTL
TRAIL	rs78318714	3	172429961	A	G	-0.0049	0.0002	3.01e-116	4.41372e-06	0.0506918	pQTL
TRAIL	rs73037136	3	171731687	A	G	-0.008	0.0011	8.213e-13	7.62305e-06	0.0875513	pQTL
TRAIL	rs73180277	3	171733984	A	G	-0.0136	0.0011	1.282e-33	3.0448e-05	0.349706	pQTL
TRAIL	rs76720373	3	171857014	A	G	0.0149	0.0005	2.53e-215	3.72365e-05	0.427677	pQTL
TRAIL	rs73167213	3	171854323	A	G	-0.0192	0.003	3.193e-10	4.26188e-05	0.489498	pQTL
TRAIL	rs113051270	3	172321155	A	G	-0.019	0.0036	9.886e-08	5.10077e-05	0.585853	pQTL
TRAIL	rs398778	3	172331531	A	C	-0.0222	0.0056	7.08e-05	5.18443e-05	0.595463	pQTL
TRAIL	rs73175066	3	172656550	T	G	-0.0183	0.0005	0	5.29245e-05	0.60787	pQTL
TRAIL	rs73037039	3	172099067	A	G	-0.0236	0.0014	1.584e-65	5.36124e-05	0.615772	pQTL
TRAIL	rs73175041	3	172578988	C	G	-0.0217	0.0046	2.128e-06	6.34093e-05	0.728302	pQTL
TRAIL	rs73169269	3	172197545	A	C	-0.0205	0.0009	1.51e-124	6.84921e-05	0.786686	pQTL
TRAIL	rs12637807	3	172089891	T	C	-0.0254	0.0038	2.627e-11	7.797e-05	0.895555	pQTL
TRAIL	rs77775212	3	172309226	A	G	-0.0237	0.0009	2.53e-165	7.84116e-05	0.900628	pQTL
TRAIL	rs59535020	3	171902034	C	G	-0.0235	0.0019	2.785e-35	9.18146e-05	1.05459	pQTL
TRAIL	rs55867522	3	171733162	T	C	-0.0284	0.0036	1.307e-15	9.74757e-05	1.11962	pQTL
TRAIL	rs4894604	3	172710288	A	G	-0.0303	0.0052	5.876e-09	9.82083e-05	1.12803	pQTL
TRAIL	rs146827832	3	172101065	T	C	-0.0273	0.0005	0	0.000102902	1.18195	pQTL
TRAIL	rs73031305	3	171998979	A	C	-0.0256	0.0003	0	0.000104653	1.20206	pQTL
TRAIL	rs9810131	3	172108555	T	C	-0.0268	0.0001	0	0.000105121	1.20744	pQTL
TRAIL	rs116658170	3	172109146	C	G	-0.0332	0.0062	8.907e-08	0.000119859	1.37675	pQTL
TRAIL	rs75278014	3	172241934	A	G	-0.0357	0.0059	1.153e-09	0.000122681	1.40917	pQTL
TRAIL	rs74976018	3	172678684	T	C	-0.0279	0.0044	1.558e-10	0.000138117	1.58649	pQTL
TRAIL	rs13059524	3	171837500	T	C	-0.0286	0.0005	0	0.000141178	1.62166	pQTL
TRAIL	rs7646507	3	172476419	A	G	-0.0375	0.0002	0	0.000155154	1.78223	pQTL
TRAIL	rs7431678	3	172652634	A	G	-0.0304	0.0001	0	0.000159508	1.83224	pQTL
TRAIL	rs62281983	3	172334348	T	C	-0.034	0.0005	0	0.000161377	1.85371	pQTL
TRAIL	rs111587306	3	172234041	A	G	-0.0364	0.0015	3.11e-128	0.000173876	1.99732	pQTL
TRAIL	rs57768608	3	172480175	T	C	-0.0259	0.0001	0	0.0001794	2.06078	pQTL
TRAIL	rs71310522	3	172389320	T	C	-0.0244	0.0036	1.034e-11	0.00018604	2.13707	pQTL
TRAIL	rs116686761	3	172624544	A	T	-0.0379	0.0016	4.26e-118	0.000195878	2.25009	pQTL
TRAIL	rs76507592	3	172095536	A	G	-0.0454	0.01	5.439e-06	0.000209481	2.40639	pQTL
TRAIL	rs73173317	3	172331005	T	C	-0.0487	0.0083	4.779e-09	0.000257901	2.96276	pQTL
TRAIL	rs113939484	3	171741368	A	G	-0.052	0.0028	7.753e-77	0.000260284	2.99014	pQTL
TRAIL	rs11716492	3	172325675	T	C	-0.0517	0.0005	0	0.000276419	3.17555	pQTL
TRAIL	rs62283841	3	171891761	A	G	-0.0521	0.0028	2.539e-77	0.000304274	3.49565	pQTL
TRAIL	rs73175007	3	172512670	A	C	-0.0563	0.0128	1.16e-05	0.000322144	3.70101	pQTL
TRAIL	rs62281942	3	171729283	A	C	-0.0429	0.0006	0	0.000361213	4.15003	pQTL
TRAIL	rs75489499	3	172503541	T	C	-0.0671	0.0082	1.919e-16	0.000613976	7.05585	pQTL
TRAIL	rs76344120	3	172192313	T	C	-0.0818	0.0001	0	0.000990568	11.388	pQTL
TRAIL	rs234060	3	172295283	T	C	-0.0735	0.0187	8.662e-05	0.00215123	24.7601	pQTL
TRAIL	rs16845310	3	172020156	A	G	-0.0784	0.0181	1.515e-05	0.00225246	25.9279	pQTL
TRAIL	rs9849338	3	172126476	A	C	-0.0767	0.0162	2.221e-06	0.00254785	29.3368	pQTL
TRAIL	rs13327037	3	172262296	A	G	-0.1325	0.0216	9.256e-10	0.00395041	45.5505	pQTL
TRAIL	rs9872638	3	172266364	A	G	-0.1551	0.0227	7.519e-12	0.00483348	55.7822	pQTL
TRAIL	rs13074711	3	172267803	T	C	0.1556	0.0227	6.443e-12	0.0049021	56.578	pQTL
VEGF	rs7763358	6	44139869	T	C	0.0578	0.0143	5.136e-05	0.000455577	13.628	pQTL
VEGF	rs34644314	6	43888210	C	G	0.0681	0.0163	2.91e-05	0.000528016	15.796	pQTL
VEGF	rs9381291	6	44105715	T	G	0.0381	0.0086	8.568e-06	0.000679567	20.3329	pQTL
VEGF	rs7761137	6	44151490	A	G	0.0452	0.0098	3.644e-06	0.000713857	21.3596	pQTL
VEGF	rs1128930	6	44200325	A	C	-0.0403	0.0087	3.465e-06	0.000760313	22.7507	pQTL
VEGF	rs2782256	6	43688343	A	G	0.0413	0.0087	1.986e-06	0.000811342	24.2788	pQTL
VEGF	rs7765264	6	43974807	A	G	0.087	0.0155	2.034e-08	0.000875059	26.1872	pQTL
VEGF	rs77518248	6	44087957	T	C	0.0993	0.018	3.566e-08	0.000949161	28.4069	pQTL
VEGF	rs9462937	6	43846430	T	G	0.0481	0.0101	2.073e-06	0.000958916	28.6991	pQTL
VEGF	rs9472153	6	43882612	A	G	0.0447	0.0087	2.866e-07	0.000977982	29.2703	pQTL
VEGF	rs9394981	6	44008747	A	G	0.0479	0.0088	5.002e-08	0.00104382	31.2428	pQTL
VEGF	rs72863966	6	43872093	A	C	-0.0637	0.0095	2.026e-11	0.00157455	47.1533	pQTL
VEGF	rs12214523	6	43939958	T	C	0.0564	0.0086	5.447e-11	0.00158958	47.6041	pQTL
VEGF	rs17209449	6	43935267	C	G	-0.1235	0.0141	2.167e-18	0.00212921	63.7991	pQTL
VEGF	rs1631155	6	43951967	A	G	0.0868	0.0097	3.297e-19	0.00262508	78.6964	pQTL
VEGF	rs62401231	6	43898150	A	G	0.0786	0.0088	5.116e-19	0.00277661	83.2518	pQTL
VEGF	rs75116661	6	43925775	A	C	-0.1456	0.017	1.122e-17	0.00393072	117.992	pQTL
VEGF	rs80075573	6	43924058	A	T	0.1638	0.0159	5.303e-25	0.00401693	120.591	pQTL
VEGF	rs78135777	6	43933264	A	G	0.2252	0.0194	3.603e-31	0.00551483	165.808	pQTL
VEGF	rs9381268	6	43933895	T	C	0.1107	0.0126	1.263e-18	0.00574307	172.71	pQTL
VEGF	rs4349808	6	43924774	T	C	0.2616	0.0084	1.96e-212	0.0338655	1048.07	pQTL
MCP1	rs199587003	17	32624780	T	C	0.0134	0.005	0.007678	2.61292e-05	0.435429	eQTL
IL-1a	rs895497	2	113763575	G	A	0.0478844	0.0243136	0.0489019	0.000711428	3.56821	eQTL
IL-16	rs7164258	15	81661346	A	G	-0.0219	0.0056	9.403e-05	0.000183629	3.8988	eQTL
MIP1b	rs72833539	17	34444424	T	C	-0.0353	0.0132	0.00754	0.000341688	3.94511	eQTL
MIF	rs4822441	22	24206355	G	A	-0.0512	0.0246	0.03725	0.0012624	4.41388	eQTL
TNF-B	rs113239947	6	31461956	A	T	0.0623	0.0292	0.0331131	0.00140372	4.63737	eQTL
IL-1a	rs1533463	2	113538782	A	G	0.0457029	0.0205307	0.0260094	0.00101348	5.08472	eQTL
IL-1a	rs1143643	2	113588302	T	C	-0.0504829	0.0223928	0.0241692	0.00106628	5.34991	eQTL
sICAM	rs281431	19	10389945	C	T	-0.0490973	0.0204142	0.0161699	0.00104558	5.43956	eQTL
FGFBasic	rs306007	4	124037060	T	A	-0.051	0.024	0.03396	0.000774453	5.86173	eQTL
SeSelectin	rs6704499	1	170107586	A	G	-0.0373	0.0178	0.03537	0.000694298	5.90425	eQTL
MCSF	rs12060965	1	110480779	C	G	-0.0342	0.0136	0.01203	0.000373864	6.33221	eQTL
IL-16	rs3922930	15	81630421	A	G	-0.0289	0.0057	4.387e-07	0.000302064	6.41415	eQTL
bNGF	rs2856813	1	115837919	C	T	-0.0611	0.0239	0.01042	0.00183882	6.50116	eQTL
MIP1b	rs854658	17	34352666	A	G	-0.0338	0.0077	1.142e-05	0.000565277	6.52812	eQTL
SCF	rs4474514	12	88953959	A	G	-0.0334	0.0129	0.009897	0.000350638	6.73532	eQTL
MIF	rs78331094	22	24281393	C	T	0.0735	0.0322	0.02249	0.00211958	7.41731	eQTL
SCF	rs1907702	12	88955469	A	G	-0.0365	0.013	0.004919	0.000432514	7.89118	eQTL
TRAIL	rs17608660	3	172302780	A	G	-0.0436	0.0201	0.03035	0.000687505	7.90143	eQTL
SeSelectin	rs78026016	1	169706082	A	G	-0.0737	0.0342	0.03124	0.000951534	8.09384	eQTL
IL-6	rs7808457	7	22798265	A	T	-0.0341	0.0118	0.003985	0.000568944	8.10631	eQTL
IL-18	rs2853127	11	112140332	T	C	-0.0546	0.0255	0.03226	0.00122008	8.47156	eQTL
TRAIL	rs3850173	3	172273004	T	G	-0.0513	0.0175	0.003404	0.000810034	9.31078	eQTL
VEGF	rs3024987	6	43740840	T	C	0.0375	0.0116	0.001229	0.000318094	9.51403	eQTL
MIF	rs34383331	22	24238079	T	A	0.1016	0.0292	0.0004971	0.0028027	9.81453	eQTL
MIF	rs182268832	22	24334133	G	T	-0.0864	0.0327	0.008278	0.00282162	9.88098	eQTL
IL-1ra	rs315930	2	113869554	A	C	-0.0349	0.0111	0.001707	0.000532687	10.1557	eQTL
MIG	rs7438137	4	76753036	C	T	0.0756	0.0242	0.001815	0.00275233	10.1648	eQTL
IL-8	rs28833215	4	74646006	A	G	-0.0356	0.0118	0.00245	0.000609137	10.3128	eQTL
FGFBasic	rs28681527	4	123744364	G	C	0.0789	0.0297	0.007899	0.00137109	10.3838	eQTL
TRAIL	rs76344120	3	172192313	T	C	-0.0818	0.0001	0	0.000984951	11.3233	eQTL
MCP1	rs1860180	17	32628064	A	G	0.037	0.0123	0.002713	0.000683293	11.3942	eQTL
IL-2ra	rs8177751	10	6029759	T	A	0.1081	0.0384	0.00482	0.00317278	11.6971	eQTL
MCP1	rs9675315	17	32541260	T	C	0.0392	0.0125	0.001772	0.000760637	12.6849	eQTL
TRAIL	rs234043	3	172313367	T	C	-0.0553	0.0179	0.002028	0.00122762	14.1165	eQTL
sVCAM	rs3917010	1	101190866	C	A	-0.0984083	0.0231502	2.12942e-05	0.00300473	15.6627	eQTL
IL-16	rs11635456	15	81524488	A	G	0.0638	0.0086	1.507e-13	0.000745672	15.8409	eQTL
sICAM	rs2278442	19	10444826	A	G	0.0831819	0.0200331	3.2927e-05	0.00333208	17.3747	eQTL
Eotaxin	rs12944577	17	32559154	A	G	-0.0584	0.0157	0.0002025	0.00157538	18.0697	eQTL
MIG	rs4386627	4	76966321	G	A	-0.1032	0.0233	9.449e-06	0.00532033	19.6996	eQTL
MCSF	rs72687271	1	110491364	A	G	-0.1086	0.0251	1.481e-05	0.0018989	23.9317	eQTL
MIP1b	rs1634503	17	34421139	A	G	-0.0752	0.0097	9.538e-15	0.00216516	25.0445	eQTL
TRAIL	rs231999	3	172273096	A	G	0.0802	0.0206	0.0001019	0.00234641	27.0119	eQTL
IL-16	rs8023541	15	81577808	T	C	-0.0506	0.0042	1.361e-33	0.00128	27.2066	eQTL
SCGFb	rs11084024	19	51228634	A	G	0.1034	0.0287	0.0003126	0.00402001	28.1769	eQTL
IL-2ra	rs3136614	10	6005674	G	A	0.1652	0.0363	5.304e-06	0.00812596	30.1076	eQTL
IL-16	rs11325	15	81601340	T	G	-0.0795	0.007	4.259e-30	0.00146685	31.1841	eQTL
RANTES	rs2251660	17	34252537	C	A	-0.1831	0.0356	2.617e-07	0.00910261	31.4077	eQTL
Eotaxin	rs1860189	17	32578358	A	G	0.1014	0.0203	5.675e-07	0.00288798	33.1689	eQTL
Eotaxin	rs77569276	17	32534568	C	G	0.1008	0.0204	7.32e-07	0.00297333	34.1521	eQTL
Eotaxin	rs12450911	17	32604425	A	G	0.1027	0.0202	3.587e-07	0.00299035	34.3482	eQTL
MIF	rs2330634	22	24250795	G	C	-0.1549	0.0248	4.498e-10	0.0112351	39.6789	eQTL
CTACK	rs867811	9	34663798	C	T	-0.1853	0.0258	7.446e-13	0.0134718	49.5569	eQTL
IL-8	rs7655660	4	74589597	A	G	-0.1876	0.0237	2.666e-15	0.00447912	71.8668	eQTL
IL-2ra	rs12722588	10	6060433	C	T	0.3344	0.0334	1.561e-23	0.0254597	96.0088	eQTL
CTACK	rs145864441	9	34639815	C	A	0.3928	0.0467	3.983e-17	0.0280191	104.612	eQTL
IL-18	rs71478720	11	112009605	T	C	-0.26	0.0273	1.669e-21	0.0230484	163.611	eQTL
MCSF	rs11579145	1	110501597	A	G	-0.1754	0.0111	7.307e-56	0.0153613	249.194	eQTL
IL-1ra	rs11677088	2	113835603	A	G	0.1827	0.0103	6.009e-71	0.016481	319.307	eQTL
IL-2ra	rs12722497	10	6095928	C	A	-0.6285	0.0482	6.941e-39	0.092831	376.065	eQTL
IL-16	rs4778639	15	81600451	T	G	0.4586	0.0083	0	0.0273829	597.649	eQTL
GROa	rs3097409	4	74743475	T	C	-0.5997	0.0212	1.37e-176	0.127385	993.249	eQTL
MIP1a	rs1634517	17	34432403	A	C	0.4013	0.0117	2.05e-258	0.0589819	1194.4	eQTL

## Sheet: S3. Source of GY
Supplementary Table 3
Outcome	Source	Reference	Case	Control	Total
Breast (Overall)	BCAC	Zhang, 2020	133384	113789	247173
Breast (Luminal A)*	" "	" "	63766.8	91477	155244
Breast (Luminal B)*	" "	" "	15941.7	91477	107419
Breast (Luminal B, HER2 Neg.)*	" "	" "	15941.7	91477	107419
Breast (HER2 Enriched)*	" "	" "	10627.8	91477	102105
Breast (Triple Negative)*	" "	" "	8602	91477	100079
Endometrial (Overall)	ECAC + E2C2 +Ukbb	O'Mara, 2018	12906	108979	121885
Endometrial (Endometrioid)	" "	" "	8758	46126	54884
Endometrial (Non-Endometrioid)	" "	" "	1230	35447	36677
Lung (Overall)	TRICL-LLCO	McKay, 2017	29266	56450	85716
Lung never sm.	" "	" "	2355	7504	9859
Lung ever sm.	" "	" "	23223	16964	40187
Lung adenocarcinoma	" "	" "	11273	55483	66756
Lung squamous	" "	" "	7426	55627	63053
Lung small cell	" "	" "	2664	21444	24108
Ovarian invasive (Overall)	OCAC	Phelan, 2017	22406	40941	63347
Ovarian (borderline)	" "	" "	3103	40941	44044
Ov. Clearcell (invasive)	" "	" "	1366	40941	42307
Ov. Endometrioid (invasive)	" "	" "	2810	40941	43751
Ov. Mucinous (invasive)	" "	" "	1417	40941	42358
Ov. Mucinous (borderline & invasive)	" "	" "	2566	40941	43507
Ov. Mucinous (borderline)	" "	" "	1149	40941	42090
Ov. Serous (invasive LG & HG)	" "	" "	14049	40941	54990
Ov. serous HG (invasive)	" "	" "	13037	40941	53978
Ov. serous LG (invasive)	" "	" "	1012	40941	41953
Ov. Serous (borderline)	" "	" "	1954	40941	42895
Ov. Serous (borderline & invasive LG)	" "	" "	14991	40941	55932
Ov. Serous (Meta-Analysis)	OCAC + CIMBA	" "	16924	68502	85426
Ovarian (Meta-Analysis)	" "	" "	26293	68502	94795
Prostate (Overall)	PRACTICAL	Schumacher, 2018	79194	61112	140306
Prostate (Advanced)	" "	" "	15167	58308	73475
Prostate (high7 vs low8 risk)	" "	" "	15561	9739	25300
Prostate (high vs low+int9 risk)	" "	" "	20658	38093	58751
*Breast cancer intrinsic subtype cases were approximated based on a distribution of [0.6/0.15/0.15/0.1] among the four subtypes.
Luminal A-like breast cancer: ER positive and/or PR positive, HER2 negative, grade 1 & 2; luminal B-like breast cancer: ER positive and/or PR positive, HER2 positive; luminal B,HER2-negative-like breast cancer: ER positive and/or PR positive, HER2 negative, grade 3; HER2-enriched-like breast cancer: ER negative and PR negative, HER2 positive; Triple-negative breast cancer: ER negative, PR negativ…
High risk prostate cancer defined as: T Stage in (‘T3′,’T4’) or N Stage in (‘N1’) or M Stage in (‘M1’) or GleasonScore≥8 or PSA at diagnosis>20 or Gleason Score Range in (‘3′,’4’) or distant/regional staging; low risk prostate cancer defined as: T Stage in (‘T0′,’T1’) and Gleason Score<=6 and PSA at diagnosis <10; intermediate risk prostate cancer defined as: T Stage in (‘T2’) OR Gleason Score=7 …

## Sheet: S4. GY Instruments
Supplementary Table 4
Outcome	rsid	chr_name	chrom_start	EA_outcome	NEA_outcome	BETA_outcome	SE_outcome
Breast (overall)	rs62465622	7	101015523	C	T	-0.00902382	0.00920511
Breast (HER2 enriched)	rs62465622	7	101015523	C	T	-0.0968719	0.0402508
Breast (luminal A)	rs62465622	7	101015523	C	T	-0.00368996	0.0121942
Breast (luminal B)	rs62465622	7	101015523	C	T	-0.00108998	0.0267335
Breast (luminal B, HER2 neg.)	rs62465622	7	101015523	C	T	-0.00989561	0.0231564
Breast (triple negative)	rs62465622	7	101015523	C	T	0.00497757	0.0233248
Ovarian (overall, MA incl. CIMBA)	rs62465622	7	101015523	T	C	0.0119	0.0175
Ovarian (serous, MA incl. CIMBA)	rs62465622	7	101015523	T	C	0.0217	0.0195
Endometrial (overall)	rs62465622	7	101015523	C	T	0.0164522	0.0226282
Endometrial (endometrioid)	rs62465622	7	101015523	C	T	0.00956082	0.026874
Endometrial (non-endometrioid)	rs62465622	7	101015523	C	T	0.00958821	0.0663744
Lung (adenocarcinoma)	rs62465622	7	101015523	C	T	0.00876349	0.023657
Lung (ever smokers)	rs62465622	7	101015523	C	T	0.00542128	0.021622
Lung (never smokers)	rs62465622	7	101015523	C	T	-0.00313591	0.052234
Lung (overall)	rs62465622	7	101015523	C	T	0.00142798	0.017109
Lung (small cell)	rs62465622	7	101015523	C	T	-0.0374589	0.043232
Lung (squamous cell)	rs62465622	7	101015523	C	T	-0.00115166	0.027483
Ovarian (overall, invasive)	rs62465622	7	101015523	C	T	0.0035	0.01972
Ovarian (clearcell, invasive)	rs62465622	7	101015523	C	T	0.01611	0.05906
Ovarian (endometrioid, invasive)	rs62465622	7	101015523	C	T	-0.005112	0.04258
Ovarian (borderline)	rs62465622	7	101015523	C	T	-0.03268	0.04219
Ovarian (mucinous, invasive)	rs62465622	7	101015523	C	T	0.05303	0.05776
Ovarian (mucinous, borderline & invasive)	rs62465622	7	101015523	C	T	0.0168	0.04436
Ovarian (mucinous, borderline)	rs62465622	7	101015523	C	T	-0.03019	0.0664
Ovarian (serous, borderline & invasive LG)	rs62465622	7	101015523	C	T	-0.05463	0.04297
Ovarian Serous (invasive LG & HG)	rs62465622	7	101015523	C	T	0.01417	0.02267
Ovarian (serous, invasive HG)	rs62465622	7	101015523	C	T	0.02266	0.02329
Ovarian (serous, borderline)	rs62465622	7	101015523	C	T	-0.02892	0.05177
Ovarian (serous, invasive LG)	rs62465622	7	101015523	C	T	-0.09555	0.07225
Prostate (overall)	rs62465622	7	101015523	T	C	-0.0011	0.0121
Prostate (advanced)	rs62465622	7	101015523	T	C	0.0173	0.0206
Prostate (high vs low risk)	rs62465622	7	101015523	T	C	0.03	0.03
Prostate (high vs low+int risk)	rs62465622	7	101015523	T	C	-0.0149	0.0196
Breast (overall)	rs75842242	9	34587241	A	C	-0.00817247	0.0124264
Breast (overall)	rs2070074	9	34649442	G	A	0.0148102	0.0103656
Breast (overall)	rs867811	9	34663798	C	T	-0.00145547	0.00618447
Breast (HER2 enriched)	rs2070074	9	34649442	G	A	0.0187676	0.0437608
Breast (HER2 enriched)	rs75842242	9	34587241	A	C	0.0107588	0.0526651
Breast (HER2 enriched)	rs867811	9	34663798	C	T	-0.00732413	0.0264611
Breast (luminal A)	rs2070074	9	34649442	G	A	0.00664529	0.0136575
Breast (luminal A)	rs75842242	9	34587241	A	C	-0.0153786	0.0162875
Breast (luminal A)	rs867811	9	34663798	C	T	-0.00417962	0.00813293
Breast (luminal B)	rs2070074	9	34649442	G	A	-0.00205721	0.0305493
Breast (luminal B)	rs75842242	9	34587241	A	C	-0.0153596	0.0358705
Breast (luminal B)	rs867811	9	34663798	C	T	-0.00841224	0.0180687
Breast (luminal B, HER2 neg.)	rs2070074	9	34649442	G	A	0.0300922	0.0255665
Breast (luminal B, HER2 neg.)	rs75842242	9	34587241	A	C	-0.0147729	0.0305898
Breast (luminal B, HER2 neg.)	rs867811	9	34663798	C	T	0.0207367	0.0154755
Breast (triple negative)	rs2070074	9	34649442	G	A	0.0277195	0.0259998
Breast (triple negative)	rs75842242	9	34587241	A	C	0.00798963	0.031425
Breast (triple negative)	rs867811	9	34663798	C	T	-0.0137519	0.0156473
Ovarian (overall, MA incl. CIMBA)	rs75842242	9	34587241	A	C	-0.002	0.024
Ovarian (overall, MA incl. CIMBA)	rs2070074	9	34649442	A	G	-0.0064	0.0202
Ovarian (overall, MA incl. CIMBA)	rs867811	9	34663798	T	C	0.0029	0.012
Ovarian (serous, MA incl. CIMBA)	rs75842242	9	34587241	A	C	-0.0173	0.0268
Ovarian (serous, MA incl. CIMBA)	rs2070074	9	34649442	A	G	-0.013	0.0225
Ovarian (serous, MA incl. CIMBA)	rs867811	9	34663798	T	C	0.0056	0.0134
Endometrial (overall)	rs75842242	9	34587241	A	C	-0.0319721	0.0315078
Endometrial (overall)	rs2070074	9	34649442	G	A	-0.0294264	0.0262441
Endometrial (overall)	rs867811	9	34663798	C	T	-0.0368061	0.0156312
Endometrial (endometrioid)	rs75842242	9	34587241	A	C	-0.0318226	0.0369778
Endometrial (endometrioid)	rs2070074	9	34649442	G	A	-0.0478588	0.0311209
Endometrial (endometrioid)	rs867811	9	34663798	C	T	-0.0404337	0.0183626
Endometrial (non-endometrioid)	rs75842242	9	34587241	A	C	-0.0524175	0.0932037
Endometrial (non-endometrioid)	rs2070074	9	34649442	G	A	0.0131055	0.0764944
Endometrial (non-endometrioid)	rs867811	9	34663798	C	T	-0.0683701	0.044318
Lung (adenocarcinoma)	rs2070074	9	34649442	G	A	0.0130485	0.027593
Lung (adenocarcinoma)	rs867811	9	34663798	T	C	-0.00989488	0.016576
Lung (ever smokers)	rs2070074	9	34649442	G	A	0.0472185	0.025258
Lung (ever smokers)	rs867811	9	34663798	T	C	0.00814306	0.015186
Lung (ever smokers)	rs145864441	9	34639815	A	C	-0.0381451	0.031538
Lung (never smokers)	rs75842242	9	34587241	A	C	0.0813435	0.0712
Lung (never smokers)	rs2070074	9	34649442	G	A	-0.187663	0.061797
Lung (overall)	rs75842242	9	34587241	A	C	-0.0469427	0.023526
Lung (overall)	rs2070074	9	34649442	G	A	0.0222183	0.019925
Lung (overall)	rs867811	9	34663798	T	C	-0.0056689	0.011985
Lung (small cell)	rs75842242	9	34587241	A	C	0.0386504	0.061652
Lung (small cell)	rs2070074	9	34649442	G	A	-0.0742484	0.051263
Lung (small cell)	rs867811	9	34663798	T	C	-0.041965	0.030364
Lung (squamous cell)	rs75842242	9	34587241	A	C	-0.0738116	0.038105
Lung (squamous cell)	rs2070074	9	34649442	G	A	0.0203094	0.031988
Lung (squamous cell)	rs867811	9	34663798	T	C	0.000216023	0.019174
Ovarian (overall, invasive)	rs75842242	9	34587241	A	C	0.01848	0.02726
Ovarian (overall, invasive)	rs2070074	9	34649442	G	A	-0.004739	0.02291
Ovarian (overall, invasive)	rs867811	9	34663798	C	T	0.002252	0.01355
Ovarian (clearcell, invasive)	rs75842242	9	34587241	A	C	0.01014	0.08243
Ovarian (clearcell, invasive)	rs2070074	9	34649442	G	A	0.1121	0.06756
Ovarian (clearcell, invasive)	rs867811	9	34663798	C	T	0.03357	0.04111
Ovarian (endometrioid, invasive)	rs75842242	9	34587241	A	C	0.0565	0.05933
Ovarian (endometrioid, invasive)	rs2070074	9	34649442	G	A	-0.01588	0.04982
Ovarian (endometrioid, invasive)	rs867811	9	34663798	C	T	-0.01961	0.0293
Ovarian (borderline)	rs75842242	9	34587241	A	C	0.02204	0.05792
Ovarian (borderline)	rs2070074	9	34649442	G	A	-0.04583	0.04975
Ovarian (borderline)	rs867811	9	34663798	C	T	0.01887	0.02879
Ovarian (mucinous, invasive)	rs75842242	9	34587241	A	C	-0.06585	0.07965
Ovarian (mucinous, invasive)	rs2070074	9	34649442	G	A	0.01263	0.06808
Ovarian (mucinous, invasive)	rs867811	9	34663798	C	T	-0.01392	0.04067
Ovarian (mucinous, borderline & invasive)	rs75842242	9	34587241	A	C	-0.03639	0.0609
Ovarian (mucinous, borderline & invasive)	rs2070074	9	34649442	G	A	-0.006162	0.0521
Ovarian (mucinous, borderline & invasive)	rs867811	9	34663798	C	T	-0.01233	0.03065
Ovarian (mucinous, borderline)	rs75842242	9	34587241	A	C	-0.005425	0.09066
Ovarian (mucinous, borderline)	rs2070074	9	34649442	G	A	-0.04815	0.07824
Ovarian (mucinous, borderline)	rs867811	9	34663798	C	T	-0.01137	0.04477
Ovarian (serous, borderline & invasive LG)	rs75842242	9	34587241	A	C	0.06778	0.05949
Ovarian (serous, borderline & invasive LG)	rs2070074	9	34649442	G	A	-0.0218	0.05018
Ovarian (serous, borderline & invasive LG)	rs867811	9	34663798	C	T	0.03539	0.02945
Ovarian Serous (invasive LG & HG)	rs75842242	9	34587241	A	C	0.004112	0.03146
Ovarian Serous (invasive LG & HG)	rs2070074	9	34649442	G	A	-0.01326	0.0265
Ovarian Serous (invasive LG & HG)	rs867811	9	34663798	C	T	0.005668	0.01564
Ovarian (serous, invasive HG)	rs75842242	9	34587241	A	C	-0.001799	0.03231
Ovarian (serous, invasive HG)	rs2070074	9	34649442	G	A	-0.01692	0.02728
Ovarian (serous, invasive HG)	rs867811	9	34663798	C	T	0.003514	0.01608
Ovarian (serous, borderline)	rs75842242	9	34587241	A	C	0.03775	0.07125
Ovarian (serous, borderline)	rs2070074	9	34649442	G	A	-0.0434	0.06116
Ovarian (serous, borderline)	rs867811	9	34663798	C	T	0.03689	0.03549
Ovarian (serous, invasive LG)	rs75842242	9	34587241	A	C	0.1277	0.1011
Ovarian (serous, invasive LG)	rs2070074	9	34649442	G	A	-0.0008709	0.08285
Ovarian (serous, invasive LG)	rs867811	9	34663798	C	T	0.02923	0.04954
Prostate (overall)	rs75842242	9	34587241	A	C	-0.0246	0.0163
Prostate (overall)	rs2070074	9	34649442	A	G	0.0281	0.0136
Prostate (overall)	rs867811	9	34663798	T	C	-0.0136	0.0082
Prostate (advanced)	rs75842242	9	34587241	A	C	-0.002	0.0283
Prostate (advanced)	rs2070074	9	34649442	A	G	0.0271	0.0232
Prostate (advanced)	rs867811	9	34663798	T	C	-0.0131	0.0141
Prostate (high vs low risk)	rs75842242	9	34587241	A	C	0.0095	0.0407
Prostate (high vs low risk)	rs2070074	9	34649442	A	G	-0.0021	0.0335
Prostate (high vs low risk)	rs867811	9	34663798	T	C	0.0129	0.0206
Prostate (high vs low+int risk)	rs75842242	9	34587241	A	C	-0.0068	0.0262
Prostate (high vs low+int risk)	rs2070074	9	34649442	A	G	0.009	0.0218
Prostate (high vs low+int risk)	rs867811	9	34663798	T	C	0.016	0.0131
Breast (overall)	rs12450911	17	32604425	G	A	-0.00237979	0.00796862
Breast (overall)	rs28481802	17	32676872	A	G	-0.00522612	0.00749459
Breast (HER2 enriched)	rs12450911	17	32604425	G	A	0.0219666	0.0339887
Breast (HER2 enriched)	rs28481802	17	32676872	A	G	0.0441755	0.031354
Breast (luminal A)	rs12450911	17	32604425	G	A	-0.00195565	0.0104987
Breast (luminal A)	rs28481802	17	32676872	A	G	-0.00850526	0.0099059
Breast (luminal B)	rs12450911	17	32604425	G	A	-0.0439232	0.0228181
Breast (luminal B)	rs28481802	17	32676872	A	G	-0.021664	0.0216187
Breast (luminal B, HER2 neg.)	rs12450911	17	32604425	G	A	0.0215433	0.0199514
Breast (luminal B, HER2 neg.)	rs28481802	17	32676872	A	G	0.00400451	0.0185456
Breast (triple negative)	rs12450911	17	32604425	G	A	0.000158828	0.0201281
Breast (triple negative)	rs28481802	17	32676872	A	G	0.0252717	0.0188594
Ovarian (overall, MA incl. CIMBA)	rs12450911	17	32604425	A	G	-0.0035	0.0154
Ovarian (overall, MA incl. CIMBA)	rs28481802	17	32676872	A	G	-0.0211	0.0141
Ovarian (serous, MA incl. CIMBA)	rs12450911	17	32604425	A	G	-0.0006	0.0171
Ovarian (serous, MA incl. CIMBA)	rs28481802	17	32676872	A	G	-0.0143	0.0158
Endometrial (overall)	rs12450911	17	32604425	G	A	0.00206511	0.0199822
Endometrial (overall)	rs28481802	17	32676872	A	G	0.00486598	0.0184985
Endometrial (endometrioid)	rs12450911	17	32604425	G	A	0.00227744	0.0235862
Endometrial (endometrioid)	rs28481802	17	32676872	A	G	-0.0202152	0.0220301
Endometrial (non-endometrioid)	rs12450911	17	32604425	G	A	0.00358333	0.0607196
Endometrial (non-endometrioid)	rs28481802	17	32676872	A	G	0.0782752	0.0560896
Lung (adenocarcinoma)	rs77569276	17	32534568	G	C	0.00380724	0.020655
Lung (adenocarcinoma)	rs28481802	17	32676872	A	G	0.00564504	0.019938
Lung (ever smokers)	rs1860189	17	32578358	G	A	-0.014248	0.01924
Lung (ever smokers)	rs28481802	17	32676872	A	G	0.0261929	0.018417
Lung (never smokers)	rs12450911	17	32604425	G	A	0.049497	0.044807
Lung (never smokers)	rs28481802	17	32676872	A	G	0.00909749	0.042456
Lung (overall)	rs9675315	17	32541260	C	T	0.0147908	0.011939
Lung (overall)	rs4471731	17	32556165	G	A	-0.00176644	0.011944
Lung (overall)	rs28481802	17	32676872	A	G	0.0229115	0.014561
Lung (small cell)	rs12450911	17	32604425	G	A	0.0105777	0.038036
Lung (small cell)	rs28481802	17	32676872	A	G	0.0386109	0.036589
Lung (squamous cell)	rs12450911	17	32604425	G	A	0.0145138	0.024137
Lung (squamous cell)	rs28481802	17	32676872	A	G	0.0350447	0.023251
Ovarian (overall, invasive)	rs12450911	17	32604425	G	A	0.008066	0.01739
Ovarian (overall, invasive)	rs28481802	17	32676872	A	G	-0.01512	0.01602
Ovarian (clearcell, invasive)	rs12450911	17	32604425	G	A	-0.06477	0.05177
Ovarian (clearcell, invasive)	rs28481802	17	32676872	A	G	-0.01172	0.04818
Ovarian (endometrioid, invasive)	rs12450911	17	32604425	G	A	0.01351	0.03775
Ovarian (endometrioid, invasive)	rs28481802	17	32676872	A	G	-0.03661	0.03483
Ovarian (borderline)	rs12450911	17	32604425	G	A	-0.00343	0.03716
Ovarian (borderline)	rs28481802	17	32676872	A	G	-0.0214	0.03426
Ovarian (mucinous, invasive)	rs12450911	17	32604425	G	A	0.05858	0.0524
Ovarian (mucinous, invasive)	rs28481802	17	32676872	A	G	-0.06884	0.04815
Ovarian (mucinous, borderline & invasive)	rs12450911	17	32604425	G	A	0.0428	0.03974
Ovarian (mucinous, borderline & invasive)	rs28481802	17	32676872	A	G	-0.05806	0.03665
Ovarian (mucinous, borderline)	rs12450911	17	32604425	G	A	0.007382	0.05849
Ovarian (mucinous, borderline)	rs28481802	17	32676872	A	G	-0.05513	0.05422
Ovarian (serous, borderline & invasive LG)	rs12450911	17	32604425	G	A	0.01271	0.03761
Ovarian (serous, borderline & invasive LG)	rs28481802	17	32676872	A	G	0.01627	0.03461
Ovarian Serous (invasive LG & HG)	rs12450911	17	32604425	G	A	0.01595	0.02011
Ovarian Serous (invasive LG & HG)	rs28481802	17	32676872	A	G	-0.003844	0.01849
Ovarian (serous, invasive HG)	rs12450911	17	32604425	G	A	0.01327	0.0207
Ovarian (serous, invasive HG)	rs28481802	17	32676872	A	G	-0.008337	0.01902
Ovarian (serous, borderline)	rs12450911	17	32604425	G	A	-0.01163	0.04559
Ovarian (serous, borderline)	rs28481802	17	32676872	A	G	-0.005128	0.04196
Ovarian (serous, invasive LG)	rs12450911	17	32604425	G	A	0.06103	0.06276
Ovarian (serous, invasive LG)	rs28481802	17	32676872	A	G	0.05663	0.05746
Prostate (overall)	rs12450911	17	32604425	A	G	0.0005	0.0107
Prostate (overall)	rs28481802	17	32676872	A	G	-0.0189	0.0099
Prostate (advanced)	rs12450911	17	32604425	A	G	-0.0338	0.0184
Prostate (advanced)	rs28481802	17	32676872	A	G	0.0046	0.017
Prostate (high vs low risk)	rs12450911	17	32604425	A	G	-0.0543	0.0269
Prostate (high vs low risk)	rs28481802	17	32676872	A	G	-0.0208	0.0248
Prostate (high vs low+int risk)	rs12450911	17	32604425	A	G	-0.0344	0.0172
Prostate (high vs low+int risk)	rs28481802	17	32676872	A	G	0.0001	0.016
Breast (overall)	rs75495477	4	74455628	A	G	-0.0272592	0.0120785
Breast (overall)	rs34700776	4	74527305	G	T	0.00918453	0.00622838
Breast (overall)	rs17202249	4	74617243	T	C	0.00510212	0.0121297
Breast (overall)	rs6815457	4	74714003	G	A	-0.00626234	0.00739725
Breast (overall)	rs1366949	4	74739076	G	T	-0.0147864	0.00720116
Breast (overall)	rs34858592	4	74749301	G	A	0.00612762	0.0106615
Breast (overall)	rs6853814	4	74811622	T	C	-0.0112389	0.0115719
Breast (overall)	rs72855280	4	74835131	A	C	0.0374364	0.012528
Breast (overall)	rs3775488	4	74862852	C	T	0.009943	0.0073312
Breast (overall)	rs79320966	4	74988426	C	A	0.000807584	0.0142508
Breast (overall)	rs11724468	4	75086421	A	G	-0.000994731	0.00771573
Breast (HER2 enriched)	rs11724468	4	75086421	A	G	-0.0454947	0.0319095
Breast (HER2 enriched)	rs1366949	4	74739076	G	T	-0.0387817	0.0298482
Breast (HER2 enriched)	rs17202249	4	74617243	T	C	0.00395605	0.0504243
Breast (HER2 enriched)	rs34700776	4	74527305	G	T	0.0241941	0.0266098
Breast (HER2 enriched)	rs34858592	4	74749301	G	A	-0.00072797	0.0435877
Breast (HER2 enriched)	rs3775488	4	74862852	C	T	-0.0107151	0.0306479
Breast (HER2 enriched)	rs6815457	4	74714003	G	A	-0.0145331	0.0306269
Breast (HER2 enriched)	rs6853814	4	74811622	T	C	-0.0547903	0.0505575
Breast (HER2 enriched)	rs72855280	4	74835131	A	C	-0.0331437	0.0534661
Breast (HER2 enriched)	rs75495477	4	74455628	A	G	-0.0178059	0.0512084
Breast (HER2 enriched)	rs79320966	4	74988426	C	A	-0.0137025	0.060584
Breast (luminal A)	rs11724468	4	75086421	A	G	0.00488288	0.010212
Breast (luminal A)	rs1366949	4	74739076	G	T	-0.00841855	0.00946416
Breast (luminal A)	rs17202249	4	74617243	T	C	0.00212289	0.0159422
Breast (luminal A)	rs34700776	4	74527305	G	T	0.0185273	0.00821838
Breast (luminal A)	rs34858592	4	74749301	G	A	-0.00163019	0.0138798
Breast (luminal A)	rs3775488	4	74862852	C	T	0.00698446	0.00953241
Breast (luminal A)	rs6815457	4	74714003	G	A	-0.0056396	0.00966614
Breast (luminal A)	rs6853814	4	74811622	T	C	-0.0109711	0.0154308
Breast (luminal A)	rs72855280	4	74835131	A	C	0.0304685	0.0164035
Breast (luminal A)	rs75495477	4	74455628	A	G	-0.0333468	0.0157709
Breast (luminal A)	rs79320966	4	74988426	C	A	0.0108009	0.0188312
Breast (luminal B)	rs11724468	4	75086421	A	G	-0.0474374	0.0218276
Breast (luminal B)	rs1366949	4	74739076	G	T	-0.0411798	0.0206539
Breast (luminal B)	rs17202249	4	74617243	T	C	0.00448167	0.0344111
Breast (luminal B)	rs34700776	4	74527305	G	T	0.00964174	0.018354
Breast (luminal B)	rs34858592	4	74749301	G	A	0.0466379	0.0308218
Breast (luminal B)	rs3775488	4	74862852	C	T	0.0205354	0.0211434
Breast (luminal B)	rs6815457	4	74714003	G	A	-0.0324458	0.0210296
Breast (luminal B)	rs6853814	4	74811622	T	C	-0.0179778	0.0343081
Breast (luminal B)	rs72855280	4	74835131	A	C	0.050653	0.0353347
Breast (luminal B)	rs75495477	4	74455628	A	G	-0.0492916	0.0357852
Breast (luminal B)	rs79320966	4	74988426	C	A	-0.0551273	0.0408275
Breast (luminal B, HER2 neg.)	rs11724468	4	75086421	A	G	0.0169191	0.0192347
Breast (luminal B, HER2 neg.)	rs1366949	4	74739076	G	T	-0.0105792	0.0178145
Breast (luminal B, HER2 neg.)	rs17202249	4	74617243	T	C	-0.0493637	0.0305188
Breast (luminal B, HER2 neg.)	rs34700776	4	74527305	G	T	0.0324201	0.0156798
Breast (luminal B, HER2 neg.)	rs34858592	4	74749301	G	A	0.0159914	0.0262083
Breast (luminal B, HER2 neg.)	rs3775488	4	74862852	C	T	0.00380214	0.0180586
Breast (luminal B, HER2 neg.)	rs6815457	4	74714003	G	A	-0.0110869	0.0182169
Breast (luminal B, HER2 neg.)	rs6853814	4	74811622	T	C	0.0220695	0.0288882
Breast (luminal B, HER2 neg.)	rs72855280	4	74835131	A	C	0.0188177	0.0309809
Breast (luminal B, HER2 neg.)	rs75495477	4	74455628	A	G	-0.0173457	0.0300339
Breast (luminal B, HER2 neg.)	rs79320966	4	74988426	C	A	-0.0222271	0.0355928
Breast (triple negative)	rs11724468	4	75086421	A	G	-0.0133173	0.0194175
Breast (triple negative)	rs1366949	4	74739076	G	T	-0.0374668	0.017905
Breast (triple negative)	rs17202249	4	74617243	T	C	0.015449	0.0302583
Breast (triple negative)	rs34700776	4	74527305	G	T	-0.0180481	0.0157375
Breast (triple negative)	rs34858592	4	74749301	G	A	0.0100291	0.0264508
Breast (triple negative)	rs3775488	4	74862852	C	T	0.030467	0.0183723
Breast (triple negative)	rs6815457	4	74714003	G	A	-0.00780389	0.0184301
Breast (triple negative)	rs6853814	4	74811622	T	C	-0.00515007	0.0296531
Breast (triple negative)	rs72855280	4	74835131	A	C	0.0872183	0.0303844
Breast (triple negative)	rs75495477	4	74455628	A	G	-0.0156737	0.030403
Breast (triple negative)	rs79320966	4	74988426	C	A	-0.00783975	0.0361177
Ovarian (overall, MA incl. CIMBA)	rs75495477	4	74455628	A	G	0.0051	0.0237
Ovarian (overall, MA incl. CIMBA)	rs34700776	4	74527305	T	G	-0.0073	0.0122
Ovarian (overall, MA incl. CIMBA)	rs17202249	4	74617243	T	C	0.0013	0.0226
Ovarian (overall, MA incl. CIMBA)	rs6815457	4	74714003	A	G	0.0021	0.014
Ovarian (overall, MA incl. CIMBA)	rs1366949	4	74739076	T	G	-0.0044	0.0139
Ovarian (overall, MA incl. CIMBA)	rs34858592	4	74749301	A	G	0.0145	0.0199
Ovarian (overall, MA incl. CIMBA)	rs6853814	4	74811622	T	C	0.0507	0.0222
Ovarian (overall, MA incl. CIMBA)	rs72855280	4	74835131	A	C	0.0071	0.0238
Ovarian (overall, MA incl. CIMBA)	rs3775488	4	74862852	T	C	0.0039	0.014
Ovarian (overall, MA incl. CIMBA)	rs79320966	4	74988426	A	C	0.029	0.0274
Ovarian (overall, MA incl. CIMBA)	rs11724468	4	75086421	A	G	-0.0105	0.0144
Ovarian (serous, MA incl. CIMBA)	rs75495477	4	74455628	A	G	-0.0001	0.0266
Ovarian (serous, MA incl. CIMBA)	rs34700776	4	74527305	T	G	-0.0041	0.0136
Ovarian (serous, MA incl. CIMBA)	rs17202249	4	74617243	T	C	0.0171	0.0251
Ovarian (serous, MA incl. CIMBA)	rs6815457	4	74714003	A	G	0.0086	0.0156
Ovarian (serous, MA incl. CIMBA)	rs1366949	4	74739076	T	G	-0.0002	0.0155
Ovarian (serous, MA incl. CIMBA)	rs34858592	4	74749301	A	G	0.0129	0.0221
Ovarian (serous, MA incl. CIMBA)	rs6853814	4	74811622	T	C	0.0507	0.0249
Ovarian (serous, MA incl. CIMBA)	rs72855280	4	74835131	A	C	0.0247	0.0263
Ovarian (serous, MA incl. CIMBA)	rs3775488	4	74862852	T	C	0.0169	0.0157
Ovarian (serous, MA incl. CIMBA)	rs79320966	4	74988426	A	C	0.0111	0.0307
Ovarian (serous, MA incl. CIMBA)	rs11724468	4	75086421	A	G	0.0012	0.0161
Endometrial (overall)	rs75495477	4	74455628	A	G	-0.0314088	0.0298586
Endometrial (overall)	rs34700776	4	74527305	G	T	-0.0129597	0.0157108
Endometrial (overall)	rs17202249	4	74617243	T	C	0.0610345	0.0291839
Endometrial (overall)	rs6815457	4	74714003	G	A	0.00556556	0.0181392
Endometrial (overall)	rs1366949	4	74739076	G	T	0.0122767	0.018494
Endometrial (overall)	rs34858592	4	74749301	G	A	0.00511538	0.0263705
Endometrial (overall)	rs6853814	4	74811622	T	C	0.00771739	0.0271039
Endometrial (overall)	rs72855280	4	74835131	A	C	0.000949389	0.0311075
Endometrial (overall)	rs3775488	4	74862852	C	T	0.0207524	0.0179132
Endometrial (overall)	rs79320966	4	74988426	C	A	0.0417631	0.0348384
Endometrial (overall)	rs11724468	4	75086421	A	G	0.0394493	0.0190898
Endometrial (endometrioid)	rs75495477	4	74455628	A	G	-0.00703674	0.034914
Endometrial (endometrioid)	rs34700776	4	74527305	G	T	-0.0152676	0.0184972
Endometrial (endometrioid)	rs17202249	4	74617243	T	C	0.0598652	0.0345241
Endometrial (endometrioid)	rs6815457	4	74714003	G	A	-0.00754433	0.0213672
Endometrial (endometrioid)	rs1366949	4	74739076	G	T	-0.0167642	0.0216571
Endometrial (endometrioid)	rs34858592	4	74749301	G	A	0.0127334	0.0314335
Endometrial (endometrioid)	rs6853814	4	74811622	T	C	0.0250313	0.0320226
Endometrial (endometrioid)	rs72855280	4	74835131	A	C	0.0414453	0.0364143
Endometrial (endometrioid)	rs3775488	4	74862852	C	T	0.0185266	0.0212215
Endometrial (endometrioid)	rs79320966	4	74988426	C	A	0.0424876	0.0413786
Endometrial (endometrioid)	rs11724468	4	75086421	A	G	0.0562203	0.0227089
Endometrial (non-endometrioid)	rs75495477	4	74455628	A	G	-0.0805876	0.0899033
Endometrial (non-endometrioid)	rs34700776	4	74527305	G	T	0.0205638	0.0451067
Endometrial (non-endometrioid)	rs17202249	4	74617243	T	C	-0.0328634	0.0850426
Endometrial (non-endometrioid)	rs6815457	4	74714003	G	A	0.00887419	0.0529317
Endometrial (non-endometrioid)	rs1366949	4	74739076	G	T	0.0701101	0.0538747
Endometrial (non-endometrioid)	rs34858592	4	74749301	G	A	-0.0207279	0.0751991
Endometrial (non-endometrioid)	rs6853814	4	74811622	T	C	0.0423015	0.0808017
Endometrial (non-endometrioid)	rs72855280	4	74835131	A	C	-0.0889611	0.0925365
Endometrial (non-endometrioid)	rs3775488	4	74862852	C	T	0.0245163	0.0523549
Endometrial (non-endometrioid)	rs79320966	4	74988426	C	A	-0.0641815	0.0993602
Endometrial (non-endometrioid)	rs11724468	4	75086421	A	G	-0.0216977	0.0554421
Lung (adenocarcinoma)	rs75495477	4	74455628	A	G	0.0609465	0.033076
Lung (adenocarcinoma)	rs34700776	4	74527305	G	T	-0.007203	0.016751
Lung (adenocarcinoma)	rs6815457	4	74714003	G	A	-0.00388943	0.018962
Lung (adenocarcinoma)	rs1366949	4	74739076	G	T	0.00658564	0.019065
Lung (adenocarcinoma)	rs34858592	4	74749301	G	A	-0.0121479	0.029576
Lung (adenocarcinoma)	rs6853814	4	74811622	T	C	-0.0313338	0.031301
Lung (adenocarcinoma)	rs72855280	4	74835131	A	C	-0.00689169	0.032652
Lung (adenocarcinoma)	rs79320966	4	74988426	C	A	-0.0124946	0.038754
Lung (adenocarcinoma)	rs11724468	4	75086421	G	A	-0.0439413	0.019325
Lung (ever smokers)	rs75495477	4	74455628	A	G	0.0463443	0.030681
Lung (ever smokers)	rs34700776	4	74527305	G	T	0.00163433	0.015367
Lung (ever smokers)	rs17202249	4	74617243	T	C	-0.00467692	0.029323
Lung (ever smokers)	rs6815457	4	74714003	G	A	-0.000746721	0.01738
Lung (ever smokers)	rs1366949	4	74739076	G	T	0.00298746	0.017321
Lung (ever smokers)	rs34858592	4	74749301	G	A	0.00696721	0.028304
Lung (ever smokers)	rs6853814	4	74811622	T	C	-0.0321049	0.029149
Lung (ever smokers)	rs72855280	4	74835131	A	C	0.0270489	0.030201
Lung (ever smokers)	rs79320966	4	74988426	C	A	-0.0341125	0.036272
Lung (ever smokers)	rs11724468	4	75086421	G	A	-0.036385	0.017588
Lung (never smokers)	rs75495477	4	74455628	A	G	0.0467796	0.075435
Lung (never smokers)	rs34700776	4	74527305	G	T	-0.0588461	0.036444
Lung (never smokers)	rs17202249	4	74617243	T	C	0.00693986	0.066554
Lung (never smokers)	rs6815457	4	74714003	G	A	-0.0855592	0.040599
Lung (never smokers)	rs1366949	4	74739076	G	T	-0.0503794	0.040313
Lung (never smokers)	rs34858592	4	74749301	G	A	0.0928809	0.062708
Lung (never smokers)	rs6853814	4	74811622	T	C	-0.0685573	0.070782
Lung (never smokers)	rs72855280	4	74835131	A	C	0.0750073	0.06638
Lung (never smokers)	rs3775488	4	74862852	C	T	-0.0360686	0.04378
Lung (never smokers)	rs79320966	4	74988426	C	A	-0.00921838	0.08892
Lung (never smokers)	rs11724468	4	75086421	G	A	-0.0322329	0.04168
Lung (overall)	rs75495477	4	74455628	A	G	0.0463758	0.02362
Lung (overall)	rs34700776	4	74527305	G	T	-0.0189542	0.012104
Lung (overall)	rs17202249	4	74617243	T	C	-0.00866947	0.022624
Lung (overall)	rs6815457	4	74714003	G	A	-0.0195212	0.013748
Lung (overall)	rs1366949	4	74739076	G	T	-0.0138723	0.013842
Lung (overall)	rs34858592	4	74749301	G	A	0.00383133	0.02196
Lung (overall)	rs6853814	4	74811622	T	C	-0.0335651	0.022449
Lung (overall)	rs72855280	4	74835131	A	C	0.0311091	0.023993
Lung (overall)	rs79320966	4	74988426	C	A	-0.0233854	0.02802
Lung (overall)	rs11724468	4	75086421	G	A	-0.0358699	0.013983
Lung (small cell)	rs75495477	4	74455628	A	G	0.125831	0.061413
Lung (small cell)	rs34700776	4	74527305	G	T	-0.00569873	0.030864
Lung (small cell)	rs17202249	4	74617243	T	C	0.036545	0.057426
Lung (small cell)	rs6815457	4	74714003	G	A	-0.00346599	0.035027
Lung (small cell)	rs1366949	4	74739076	G	T	0.0273969	0.035152
Lung (small cell)	rs34858592	4	74749301	G	A	-0.0191524	0.054993
Lung (small cell)	rs6853814	4	74811622	T	C	-0.027179	0.058006
Lung (small cell)	rs72855280	4	74835131	A	C	0.0315142	0.061228
Lung (small cell)	rs3775488	4	74862852	C	T	0.0462722	0.039611
Lung (small cell)	rs79320966	4	74988426	C	A	-0.10821	0.071946
Lung (small cell)	rs11724468	4	75086421	G	A	0.0163703	0.035341
Lung (squamous cell)	rs75495477	4	74455628	A	G	0.0259211	0.038769
Lung (squamous cell)	rs34700776	4	74527305	G	T	-0.0289411	0.019461
Lung (squamous cell)	rs17202249	4	74617243	T	C	0.0259504	0.036879
Lung (squamous cell)	rs6815457	4	74714003	G	A	-0.0021457	0.02205
Lung (squamous cell)	rs1366949	4	74739076	G	T	-0.0306863	0.022026
Lung (squamous cell)	rs34858592	4	74749301	G	A	0.000642206	0.035444
Lung (squamous cell)	rs6853814	4	74811622	T	C	-0.0111388	0.036044
Lung (squamous cell)	rs72855280	4	74835131	A	C	0.0803202	0.038131
Lung (squamous cell)	rs79320966	4	74988426	C	A	0.00143403	0.045605
Lung (squamous cell)	rs11724468	4	75086421	G	A	-0.0462106	0.022384
Ovarian (overall, invasive)	rs75495477	4	74455628	A	G	0.01007	0.02649
Ovarian (overall, invasive)	rs34700776	4	74527305	G	T	-0.00455	0.01375
Ovarian (overall, invasive)	rs17202249	4	74617243	T	C	-0.006013	0.02579
Ovarian (overall, invasive)	rs6815457	4	74714003	G	A	-0.005925	0.01588
Ovarian (overall, invasive)	rs1366949	4	74739076	G	T	-0.005372	0.01582
Ovarian (overall, invasive)	rs34858592	4	74749301	G	A	0.0004681	0.02245
Ovarian (overall, invasive)	rs6853814	4	74811622	T	C	0.06037	0.02473
Ovarian (overall, invasive)	rs72855280	4	74835131	A	C	-0.0004444	0.02723
Ovarian (overall, invasive)	rs3775488	4	74862852	C	T	0.01109	0.01591
Ovarian (overall, invasive)	rs79320966	4	74988426	C	A	0.03682	0.03062
Ovarian (overall, invasive)	rs11724468	4	75086421	A	G	-0.01844	0.0163
Ovarian (clearcell, invasive)	rs75495477	4	74455628	A	G	0.04921	0.07854
Ovarian (clearcell, invasive)	rs34700776	4	74527305	G	T	-0.002714	0.04173
Ovarian (clearcell, invasive)	rs17202249	4	74617243	T	C	-0.1259	0.08017
Ovarian (clearcell, invasive)	rs6815457	4	74714003	G	A	-0.005108	0.04781
Ovarian (clearcell, invasive)	rs1366949	4	74739076	G	T	-0.001378	0.04833
Ovarian (clearcell, invasive)	rs34858592	4	74749301	G	A	0.05843	0.06813
Ovarian (clearcell, invasive)	rs6853814	4	74811622	T	C	0.1073	0.07362
Ovarian (clearcell, invasive)	rs72855280	4	74835131	A	C	-0.04622	0.08445
Ovarian (clearcell, invasive)	rs3775488	4	74862852	C	T	-0.02394	0.04825
Ovarian (clearcell, invasive)	rs79320966	4	74988426	C	A	0.04774	0.09275
Ovarian (clearcell, invasive)	rs11724468	4	75086421	A	G	-0.004326	0.04926
Ovarian (endometrioid, invasive)	rs75495477	4	74455628	A	G	0.02148	0.05728
Ovarian (endometrioid, invasive)	rs34700776	4	74527305	G	T	-0.01801	0.02984
Ovarian (endometrioid, invasive)	rs17202249	4	74617243	T	C	0.01313	0.05577
Ovarian (endometrioid, invasive)	rs6815457	4	74714003	G	A	-0.0324	0.03419
Ovarian (endometrioid, invasive)	rs1366949	4	74739076	G	T	-0.04519	0.03415
Ovarian (endometrioid, invasive)	rs34858592	4	74749301	G	A	0.03828	0.04868
Ovarian (endometrioid, invasive)	rs6853814	4	74811622	T	C	0.02541	0.05364
Ovarian (endometrioid, invasive)	rs72855280	4	74835131	A	C	-0.01044	0.05932
Ovarian (endometrioid, invasive)	rs3775488	4	74862852	C	T	-0.004116	0.03457
Ovarian (endometrioid, invasive)	rs79320966	4	74988426	C	A	0.09356	0.06747
Ovarian (endometrioid, invasive)	rs11724468	4	75086421	A	G	-0.06721	0.03509
Ovarian (borderline)	rs75495477	4	74455628	A	G	0.02459	0.05547
Ovarian (borderline)	rs34700776	4	74527305	G	T	0.04796	0.02949
Ovarian (borderline)	rs17202249	4	74617243	T	C	0.06269	0.05391
Ovarian (borderline)	rs6815457	4	74714003	G	A	-0.04619	0.03344
Ovarian (borderline)	rs1366949	4	74739076	G	T	0.0168	0.03379
Ovarian (borderline)	rs34858592	4	74749301	G	A	-0.01912	0.04737
Ovarian (borderline)	rs6853814	4	74811622	T	C	-0.02553	0.05414
Ovarian (borderline)	rs72855280	4	74835131	A	C	0.1072	0.05648
Ovarian (borderline)	rs3775488	4	74862852	C	T	0.03266	0.03427
Ovarian (borderline)	rs79320966	4	74988426	C	A	-0.05833	0.06391
Ovarian (borderline)	rs11724468	4	75086421	A	G	0.04348	0.03542
Ovarian (mucinous, invasive)	rs75495477	4	74455628	A	G	0.1301	0.07556
Ovarian (mucinous, invasive)	rs34700776	4	74527305	G	T	-0.002259	0.04121
Ovarian (mucinous, invasive)	rs17202249	4	74617243	T	C	-0.01618	0.07799
Ovarian (mucinous, invasive)	rs6815457	4	74714003	G	A	-0.05732	0.04685
Ovarian (mucinous, invasive)	rs1366949	4	74739076	G	T	-0.01516	0.04753
Ovarian (mucinous, invasive)	rs34858592	4	74749301	G	A	0.03974	0.06771
Ovarian (mucinous, invasive)	rs6853814	4	74811622	T	C	-0.00459	0.07336
Ovarian (mucinous, invasive)	rs72855280	4	74835131	A	C	0.04493	0.08201
Ovarian (mucinous, invasive)	rs3775488	4	74862852	C	T	-0.08108	0.04736
Ovarian (mucinous, invasive)	rs79320966	4	74988426	C	A	-0.03392	0.08863
Ovarian (mucinous, invasive)	rs11724468	4	75086421	A	G	0.005717	0.04869
Ovarian (mucinous, borderline & invasive)	rs75495477	4	74455628	A	G	0.1012	0.05763
Ovarian (mucinous, borderline & invasive)	rs34700776	4	74527305	G	T	0.01558	0.03125
Ovarian (mucinous, borderline & invasive)	rs17202249	4	74617243	T	C	0.02479	0.05825
Ovarian (mucinous, borderline & invasive)	rs6815457	4	74714003	G	A	-0.0487	0.03563
Ovarian (mucinous, borderline & invasive)	rs1366949	4	74739076	G	T	0.03702	0.03626
Ovarian (mucinous, borderline & invasive)	rs34858592	4	74749301	G	A	0.002099	0.05079
Ovarian (mucinous, borderline & invasive)	rs6853814	4	74811622	T	C	0.002517	0.05609
Ovarian (mucinous, borderline & invasive)	rs72855280	4	74835131	A	C	0.0808	0.06117
Ovarian (mucinous, borderline & invasive)	rs3775488	4	74862852	C	T	-0.03428	0.03613
Ovarian (mucinous, borderline & invasive)	rs79320966	4	74988426	C	A	-0.03649	0.06746
Ovarian (mucinous, borderline & invasive)	rs11724468	4	75086421	A	G	0.005205	0.03725
Ovarian (mucinous, borderline)	rs75495477	4	74455628	A	G	0.05752	0.08509
Ovarian (mucinous, borderline)	rs34700776	4	74527305	G	T	0.0248	0.04596
Ovarian (mucinous, borderline)	rs17202249	4	74617243	T	C	0.07636	0.08431
Ovarian (mucinous, borderline)	rs6815457	4	74714003	G	A	-0.04852	0.05252
Ovarian (mucinous, borderline)	rs1366949	4	74739076	G	T	0.0966	0.05389
Ovarian (mucinous, borderline)	rs34858592	4	74749301	G	A	-0.04369	0.0737
Ovarian (mucinous, borderline)	rs6853814	4	74811622	T	C	0.0215	0.08335
Ovarian (mucinous, borderline)	rs72855280	4	74835131	A	C	0.1336	0.08841
Ovarian (mucinous, borderline)	rs3775488	4	74862852	C	T	0.02462	0.05364
Ovarian (mucinous, borderline)	rs79320966	4	74988426	C	A	-0.0464	0.09927
Ovarian (mucinous, borderline)	rs11724468	4	75086421	A	G	0.004196	0.05543
Ovarian (serous, borderline & invasive LG)	rs75495477	4	74455628	A	G	-0.04299	0.05735
Ovarian (serous, borderline & invasive LG)	rs34700776	4	74527305	G	T	0.07587	0.02995
Ovarian (serous, borderline & invasive LG)	rs17202249	4	74617243	T	C	0.02156	0.05478
Ovarian (serous, borderline & invasive LG)	rs6815457	4	74714003	G	A	-0.01629	0.03412
Ovarian (serous, borderline & invasive LG)	rs1366949	4	74739076	G	T	-0.03966	0.03415
Ovarian (serous, borderline & invasive LG)	rs34858592	4	74749301	G	A	0.02204	0.04853
Ovarian (serous, borderline & invasive LG)	rs6853814	4	74811622	T	C	0.02186	0.05429
Ovarian (serous, borderline & invasive LG)	rs72855280	4	74835131	A	C	0.0608	0.05807
Ovarian (serous, borderline & invasive LG)	rs3775488	4	74862852	C	T	0.03263	0.03465
Ovarian (serous, borderline & invasive LG)	rs79320966	4	74988426	C	A	-0.03127	0.06528
Ovarian (serous, borderline & invasive LG)	rs11724468	4	75086421	A	G	0.03259	0.03567
Ovarian Serous (invasive LG & HG)	rs75495477	4	74455628	A	G	0.004742	0.03064
Ovarian Serous (invasive LG & HG)	rs34700776	4	74527305	G	T	0.0007665	0.01586
Ovarian Serous (invasive LG & HG)	rs17202249	4	74617243	T	C	0.01381	0.02964
Ovarian Serous (invasive LG & HG)	rs6815457	4	74714003	G	A	0.000404	0.0183
Ovarian Serous (invasive LG & HG)	rs1366949	4	74739076	G	T	6.33e-05	0.01829
Ovarian Serous (invasive LG & HG)	rs34858592	4	74749301	G	A	-0.006387	0.0259
Ovarian Serous (invasive LG & HG)	rs6853814	4	74811622	T	C	0.06363	0.02868
Ovarian Serous (invasive LG & HG)	rs72855280	4	74835131	A	C	0.02194	0.0312
Ovarian Serous (invasive LG & HG)	rs3775488	4	74862852	C	T	0.0316	0.01845
Ovarian Serous (invasive LG & HG)	rs79320966	4	74988426	C	A	0.01565	0.03534
Ovarian Serous (invasive LG & HG)	rs11724468	4	75086421	A	G	-0.005106	0.01884
Ovarian (serous, invasive HG)	rs75495477	4	74455628	A	G	0.01892	0.03153
Ovarian (serous, invasive HG)	rs34700776	4	74527305	G	T	-0.006156	0.01632
Ovarian (serous, invasive HG)	rs17202249	4	74617243	T	C	0.01364	0.03055
Ovarian (serous, invasive HG)	rs6815457	4	74714003	G	A	-0.00455	0.01882
Ovarian (serous, invasive HG)	rs1366949	4	74739076	G	T	0.002648	0.01882
Ovarian (serous, invasive HG)	rs34858592	4	74749301	G	A	-0.01085	0.02664
Ovarian (serous, invasive HG)	rs6853814	4	74811622	T	C	0.05491	0.02957
Ovarian (serous, invasive HG)	rs72855280	4	74835131	A	C	0.02394	0.03206
Ovarian (serous, invasive HG)	rs3775488	4	74862852	C	T	0.03493	0.01901
Ovarian (serous, invasive HG)	rs79320966	4	74988426	C	A	0.01146	0.03639
Ovarian (serous, invasive HG)	rs11724468	4	75086421	A	G	-0.002335	0.0194
Ovarian (serous, borderline)	rs75495477	4	74455628	A	G	-0.007735	0.06904
Ovarian (serous, borderline)	rs34700776	4	74527305	G	T	0.0634	0.03628
Ovarian (serous, borderline)	rs17202249	4	74617243	T	C	0.04244	0.06654
Ovarian (serous, borderline)	rs6815457	4	74714003	G	A	-0.04896	0.04097
Ovarian (serous, borderline)	rs1366949	4	74739076	G	T	-0.03203	0.04117
Ovarian (serous, borderline)	rs34858592	4	74749301	G	A	-0.002543	0.05849
Ovarian (serous, borderline)	rs6853814	4	74811622	T	C	-0.05389	0.06724
Ovarian (serous, borderline)	rs72855280	4	74835131	A	C	0.0907	0.06953
Ovarian (serous, borderline)	rs3775488	4	74862852	C	T	0.03507	0.04214
Ovarian (serous, borderline)	rs79320966	4	74988426	C	A	-0.07636	0.07883
Ovarian (serous, borderline)	rs11724468	4	75086421	A	G	0.06495	0.04357
Ovarian (serous, invasive LG)	rs75495477	4	74455628	A	G	-0.15	0.09723
Ovarian (serous, invasive LG)	rs34700776	4	74527305	G	T	0.09729	0.04989
Ovarian (serous, invasive LG)	rs17202249	4	74617243	T	C	0.007453	0.09049
Ovarian (serous, invasive LG)	rs6815457	4	74714003	G	A	0.05113	0.05791
Ovarian (serous, invasive LG)	rs1366949	4	74739076	G	T	-0.05417	0.05767
Ovarian (serous, invasive LG)	rs34858592	4	74749301	G	A	0.06706	0.0816
Ovarian (serous, invasive LG)	rs6853814	4	74811622	T	C	0.1577	0.08706
Ovarian (serous, invasive LG)	rs72855280	4	74835131	A	C	0.01643	0.09928
Ovarian (serous, invasive LG)	rs3775488	4	74862852	C	T	0.0207	0.05756
Ovarian (serous, invasive LG)	rs79320966	4	74988426	C	A	0.05671	0.109
Ovarian (serous, invasive LG)	rs11724468	4	75086421	A	G	-0.009604	0.05867
Prostate (overall)	rs75495477	4	74455628	A	G	-0.0495	0.016
Prostate (overall)	rs34700776	4	74527305	T	G	0.0468	0.0082
Prostate (overall)	rs17202249	4	74617243	T	C	-0.0179	0.0164
Prostate (overall)	rs6815457	4	74714003	A	G	0.006	0.0098
Prostate (overall)	rs1366949	4	74739076	T	G	0.0037	0.0097
Prostate (overall)	rs34858592	4	74749301	A	G	0.0172	0.0139
Prostate (overall)	rs6853814	4	74811622	T	C	0.0104	0.0151
Prostate (overall)	rs72855280	4	74835131	A	C	0.0146	0.0171
Prostate (overall)	rs3775488	4	74862852	T	C	0.0108	0.0096
Prostate (overall)	rs79320966	4	74988426	A	C	0.0046	0.0188
Prostate (overall)	rs11724468	4	75086421	A	G	-0.0127	0.0102
Prostate (advanced)	rs75495477	4	74455628	A	G	-0.0218	0.0273
Prostate (advanced)	rs34700776	4	74527305	T	G	0.037	0.0141
Prostate (advanced)	rs17202249	4	74617243	T	C	-0.0331	0.0281
Prostate (advanced)	rs6815457	4	74714003	A	G	0.0135	0.0167
Prostate (advanced)	rs1366949	4	74739076	T	G	0.0072	0.0168
Prostate (advanced)	rs34858592	4	74749301	A	G	-0.022	0.0238
Prostate (advanced)	rs6853814	4	74811622	T	C	-0.0093	0.0253
Prostate (advanced)	rs72855280	4	74835131	A	C	0.0123	0.0297
Prostate (advanced)	rs3775488	4	74862852	T	C	0.02	0.0166
Prostate (advanced)	rs79320966	4	74988426	A	C	-0.0245	0.0322
Prostate (advanced)	rs11724468	4	75086421	A	G	0.0048	0.0174
Prostate (high vs low risk)	rs75495477	4	74455628	A	G	-0.0298	0.0404
Prostate (high vs low risk)	rs34700776	4	74527305	T	G	0.011	0.021
Prostate (high vs low risk)	rs17202249	4	74617243	T	C	-0.0713	0.042
Prostate (high vs low risk)	rs6815457	4	74714003	A	G	-0.0002	0.0245
Prostate (high vs low risk)	rs1366949	4	74739076	T	G	0.0215	0.0245
Prostate (high vs low risk)	rs34858592	4	74749301	A	G	-0.0508	0.0355
Prostate (high vs low risk)	rs6853814	4	74811622	T	C	0.0503	0.0376
Prostate (high vs low risk)	rs72855280	4	74835131	A	C	-0.037	0.0437
Prostate (high vs low risk)	rs3775488	4	74862852	T	C	0.0237	0.0239
Prostate (high vs low risk)	rs79320966	4	74988426	A	C	-0.0016	0.0474
Prostate (high vs low risk)	rs11724468	4	75086421	A	G	-0.0045	0.0252
Prostate (high vs low+int risk)	rs75495477	4	74455628	A	G	-0.0185	0.026
Prostate (high vs low+int risk)	rs34700776	4	74527305	T	G	0.001	0.0133
Prostate (high vs low+int risk)	rs17202249	4	74617243	T	C	-0.0055	0.0268
Prostate (high vs low+int risk)	rs6815457	4	74714003	A	G	0.0113	0.0158
Prostate (high vs low+int risk)	rs1366949	4	74739076	T	G	0.0143	0.0157
Prostate (high vs low+int risk)	rs34858592	4	74749301	A	G	-0.0164	0.0225
Prostate (high vs low+int risk)	rs6853814	4	74811622	T	C	-0.0104	0.0242
Prostate (high vs low+int risk)	rs72855280	4	74835131	A	C	-0.0278	0.0275
Prostate (high vs low+int risk)	rs3775488	4	74862852	T	C	-0.0175	0.0156
Prostate (high vs low+int risk)	rs79320966	4	74988426	A	C	0.0199	0.0304
Prostate (high vs low+int risk)	rs11724468	4	75086421	A	G	-0.005	0.0164
Breast (overall)	rs73149798	7	80982822	T	A	-0.00880039	0.0162801
Breast (overall)	rs2967922	7	81048444	G	A	-0.00774926	0.0135195
Breast (overall)	rs7788796	7	81129093	C	T	0.0260487	0.0177375
Breast (overall)	rs5745687	7	81359051	T	C	0.0209861	0.0128897
Breast (overall)	rs10239816	7	81821760	T	G	-0.0228269	0.0157597
Breast (overall)	rs145168020	7	81853772	T	C	0.0155287	0.0165879
Breast (HER2 enriched)	rs10239816	7	81821760	T	G	-0.0214264	0.066682
Breast (HER2 enriched)	rs145168020	7	81853772	T	C	-0.124294	0.0743398
Breast (HER2 enriched)	rs2967922	7	81048444	G	A	-0.0284125	0.0565859
Breast (HER2 enriched)	rs5745687	7	81359051	T	C	0.0214269	0.0549283
Breast (HER2 enriched)	rs73149798	7	80982822	T	A	-0.0390763	0.0665609
Breast (HER2 enriched)	rs7788796	7	81129093	C	T	-0.0260022	0.0751593
Breast (luminal A)	rs10239816	7	81821760	T	G	-0.0325564	0.0209881
Breast (luminal A)	rs145168020	7	81853772	T	C	0.0513307	0.0215296
Breast (luminal A)	rs2967922	7	81048444	G	A	0.0132456	0.017728
Breast (luminal A)	rs5745687	7	81359051	T	C	0.00258147	0.0170501
Breast (luminal A)	rs73149798	7	80982822	T	A	-0.00194975	0.0212637
Breast (luminal A)	rs7788796	7	81129093	C	T	0.0418743	0.0237802
Breast (luminal B)	rs10239816	7	81821760	T	G	0.0334143	0.044778
Breast (luminal B)	rs145168020	7	81853772	T	C	-0.0344519	0.0494614
Breast (luminal B)	rs2967922	7	81048444	G	A	-0.0434976	0.0386728
Breast (luminal B)	rs5745687	7	81359051	T	C	0.0244418	0.0379105
Breast (luminal B)	rs73149798	7	80982822	T	A	0.123248	0.0494434
Breast (luminal B)	rs7788796	7	81129093	C	T	-0.0124274	0.0519974
Breast (luminal B, HER2 neg.)	rs10239816	7	81821760	T	G	-0.00985055	0.0394385
Breast (luminal B, HER2 neg.)	rs145168020	7	81853772	T	C	-0.00563329	0.0418393
Breast (luminal B, HER2 neg.)	rs2967922	7	81048444	G	A	0.013317	0.0337287
Breast (luminal B, HER2 neg.)	rs5745687	7	81359051	T	C	0.023381	0.0320929
Breast (luminal B, HER2 neg.)	rs73149798	7	80982822	T	A	-0.0260618	0.0397672
Breast (luminal B, HER2 neg.)	rs7788796	7	81129093	C	T	0.0307151	0.0454109
Breast (triple negative)	rs10239816	7	81821760	T	G	-0.0253731	0.0399959
Breast (triple negative)	rs145168020	7	81853772	T	C	-0.0180014	0.0423324
Breast (triple negative)	rs2967922	7	81048444	G	A	-0.0782749	0.0329472
Breast (triple negative)	rs5745687	7	81359051	T	C	0.0453229	0.0320772
Breast (triple negative)	rs73149798	7	80982822	T	A	-0.0056074	0.0406052
Breast (triple negative)	rs7788796	7	81129093	C	T	0.0396009	0.0461189
Ovarian (overall, MA incl. CIMBA)	rs73149798	7	80982822	A	T	-0.0528	0.0311
Ovarian (overall, MA incl. CIMBA)	rs2967922	7	81048444	A	G	-0.0274	0.0259
Ovarian (overall, MA incl. CIMBA)	rs7788796	7	81129093	T	C	-0.0293	0.034
Ovarian (overall, MA incl. CIMBA)	rs5745687	7	81359051	T	C	-0.0185	0.0249
Ovarian (overall, MA incl. CIMBA)	rs10239816	7	81821760	T	G	0.024	0.0295
Ovarian (overall, MA incl. CIMBA)	rs145168020	7	81853772	T	C	0.0015	0.0324
Ovarian (serous, MA incl. CIMBA)	rs73149798	7	80982822	A	T	-0.0683	0.0347
Ovarian (serous, MA incl. CIMBA)	rs2967922	7	81048444	A	G	-0.0125	0.0289
Ovarian (serous, MA incl. CIMBA)	rs7788796	7	81129093	T	C	-0.0218	0.0381
Ovarian (serous, MA incl. CIMBA)	rs5745687	7	81359051	T	C	-0.0115	0.0277
Ovarian (serous, MA incl. CIMBA)	rs10239816	7	81821760	T	G	0.0229	0.0329
Ovarian (serous, MA incl. CIMBA)	rs145168020	7	81853772	T	C	0.0098	0.0359
Endometrial (overall)	rs73149798	7	80982822	T	A	-0.0355186	0.0414204
Endometrial (overall)	rs2967922	7	81048444	G	A	-0.00127819	0.0336786
Endometrial (overall)	rs7788796	7	81129093	C	T	0.022074	0.0419473
Endometrial (overall)	rs5745687	7	81359051	T	C	0.0142856	0.0322869
Endometrial (overall)	rs10239816	7	81821760	T	G	-0.0102758	0.0379706
Endometrial (overall)	rs145168020	7	81853772	T	C	0.0592699	0.0417692
Endometrial (endometrioid)	rs73149798	7	80982822	T	A	-0.0462985	0.0486483
Endometrial (endometrioid)	rs2967922	7	81048444	G	A	0.0191374	0.0396473
Endometrial (endometrioid)	rs7788796	7	81129093	C	T	0.0316285	0.0500903
Endometrial (endometrioid)	rs5745687	7	81359051	T	C	0.0247089	0.0381475
Endometrial (endometrioid)	rs10239816	7	81821760	T	G	0.0135293	0.0450201
Endometrial (endometrioid)	rs145168020	7	81853772	T	C	0.0389018	0.0491831
Endometrial (non-endometrioid)	rs73149798	7	80982822	T	A	0.035391	0.119098
Endometrial (non-endometrioid)	rs2967922	7	81048444	G	A	0.0310726	0.0991116
Endometrial (non-endometrioid)	rs7788796	7	81129093	C	T	-0.160499	0.118929
Endometrial (non-endometrioid)	rs5745687	7	81359051	T	C	0.125133	0.0919685
Endometrial (non-endometrioid)	rs10239816	7	81821760	T	G	0.088181	0.115546
Endometrial (non-endometrioid)	rs145168020	7	81853772	T	C	0.0221413	0.123993
Lung (adenocarcinoma)	rs73149798	7	80982822	T	A	-0.0489492	0.043059
Lung (adenocarcinoma)	rs2967922	7	81048444	G	A	-0.0114116	0.041263
Lung (adenocarcinoma)	rs7788796	7	81129093	C	T	-0.0370944	0.042204
Lung (adenocarcinoma)	rs5745687	7	81359051	T	C	-0.0322639	0.033431
Lung (adenocarcinoma)	rs10239816	7	81821760	T	G	-0.0185469	0.038915
Lung (adenocarcinoma)	rs145168020	7	81853772	T	C	0.00458248	0.048235
Lung (ever smokers)	rs73149798	7	80982822	T	A	-0.0168709	0.03922
Lung (ever smokers)	rs2967922	7	81048444	G	A	0.0183096	0.038907
Lung (ever smokers)	rs7788796	7	81129093	C	T	-0.0293559	0.038218
Lung (ever smokers)	rs5745687	7	81359051	T	C	0.0245287	0.0309
Lung (ever smokers)	rs10239816	7	81821760	T	G	-0.0195488	0.036472
Lung (ever smokers)	rs145168020	7	81853772	T	C	-0.0251558	0.044849
Lung (never smokers)	rs73149798	7	80982822	T	A	-0.0173575	0.093981
Lung (never smokers)	rs2967922	7	81048444	G	A	0.0808381	0.088422
Lung (never smokers)	rs7788796	7	81129093	C	T	0.0258585	0.098443
Lung (never smokers)	rs5745687	7	81359051	T	C	-0.0466766	0.07142
Lung (never smokers)	rs10239816	7	81821760	T	G	-0.180896	0.08705
Lung (never smokers)	rs145168020	7	81853772	T	C	0.132204	0.105785
Lung (overall)	rs73149798	7	80982822	T	A	0.0158469	0.031091
Lung (overall)	rs2967922	7	81048444	G	A	0.0132372	0.031617
Lung (overall)	rs7788796	7	81129093	C	T	-0.0179185	0.030399
Lung (overall)	rs5745687	7	81359051	T	C	0.0154746	0.024195
Lung (overall)	rs10239816	7	81821760	T	G	-0.0278975	0.028387
Lung (overall)	rs145168020	7	81853772	T	C	0.0101335	0.035473
Lung (small cell)	rs73149798	7	80982822	T	A	0.088569	0.079339
Lung (small cell)	rs2967922	7	81048444	G	A	0.0393481	0.077061
Lung (small cell)	rs7788796	7	81129093	C	T	-0.0196497	0.077224
Lung (small cell)	rs5745687	7	81359051	T	C	0.0355438	0.062508
Lung (small cell)	rs10239816	7	81821760	T	G	-0.057034	0.073253
Lung (small cell)	rs145168020	7	81853772	T	C	0.0293695	0.087973
Lung (squamous cell)	rs73149798	7	80982822	T	A	0.0403429	0.049292
Lung (squamous cell)	rs2967922	7	81048444	G	A	0.0528303	0.050324
Lung (squamous cell)	rs7788796	7	81129093	C	T	-0.0548262	0.04833
Lung (squamous cell)	rs5745687	7	81359051	T	C	0.0516964	0.038871
Lung (squamous cell)	rs10239816	7	81821760	T	G	-0.0395145	0.045743
Lung (squamous cell)	rs145168020	7	81853772	T	C	0.0691986	0.057164
Ovarian (overall, invasive)	rs73149798	7	80982822	T	A	-0.06062	0.03522
Ovarian (overall, invasive)	rs2967922	7	81048444	G	A	-0.0393	0.02928
Ovarian (overall, invasive)	rs7788796	7	81129093	C	T	-0.01876	0.03804
Ovarian (overall, invasive)	rs5745687	7	81359051	T	C	-0.02132	0.0284
Ovarian (overall, invasive)	rs10239816	7	81821760	T	G	0.02095	0.03348
Ovarian (overall, invasive)	rs145168020	7	81853772	T	C	0.007475	0.0368
Ovarian (clearcell, invasive)	rs73149798	7	80982822	T	A	0.01882	0.109
Ovarian (clearcell, invasive)	rs2967922	7	81048444	G	A	-0.133	0.08731
Ovarian (clearcell, invasive)	rs7788796	7	81129093	C	T	-0.06913	0.1134
Ovarian (clearcell, invasive)	rs5745687	7	81359051	T	C	-0.00128	0.08618
Ovarian (clearcell, invasive)	rs10239816	7	81821760	T	G	0.09941	0.09787
Ovarian (clearcell, invasive)	rs145168020	7	81853772	T	C	-0.07783	0.1142
Ovarian (endometrioid, invasive)	rs73149798	7	80982822	T	A	-0.0606	0.07673
Ovarian (endometrioid, invasive)	rs2967922	7	81048444	G	A	-0.04735	0.06327
Ovarian (endometrioid, invasive)	rs7788796	7	81129093	C	T	-0.1055	0.08032
Ovarian (endometrioid, invasive)	rs5745687	7	81359051	T	C	-0.006031	0.06126
Ovarian (endometrioid, invasive)	rs10239816	7	81821760	T	G	0.04014	0.07204
Ovarian (endometrioid, invasive)	rs145168020	7	81853772	T	C	-0.02398	0.0805
Ovarian (borderline)	rs73149798	7	80982822	T	A	0.03266	0.07741
Ovarian (borderline)	rs2967922	7	81048444	G	A	0.03136	0.06308
Ovarian (borderline)	rs7788796	7	81129093	C	T	0.007123	0.08296
Ovarian (borderline)	rs5745687	7	81359051	T	C	-0.05554	0.06044
Ovarian (borderline)	rs10239816	7	81821760	T	G	0.04869	0.07129
Ovarian (borderline)	rs145168020	7	81853772	T	C	0.08047	0.07713
Ovarian (mucinous, invasive)	rs73149798	7	80982822	T	A	-0.03618	0.1048
Ovarian (mucinous, invasive)	rs2967922	7	81048444	G	A	-0.05925	0.08818
Ovarian (mucinous, invasive)	rs7788796	7	81129093	C	T	-0.01059	0.1134
Ovarian (mucinous, invasive)	rs5745687	7	81359051	T	C	-0.01483	0.08578
Ovarian (mucinous, invasive)	rs10239816	7	81821760	T	G	-0.1657	0.1056
Ovarian (mucinous, invasive)	rs145168020	7	81853772	T	C	0.1672	0.1061
Ovarian (mucinous, borderline & invasive)	rs73149798	7	80982822	T	A	-0.0775	0.07914
Ovarian (mucinous, borderline & invasive)	rs2967922	7	81048444	G	A	-0.07426	0.06596
Ovarian (mucinous, borderline & invasive)	rs7788796	7	81129093	C	T	0.01405	0.08703
Ovarian (mucinous, borderline & invasive)	rs5745687	7	81359051	T	C	0.01293	0.06403
Ovarian (mucinous, borderline & invasive)	rs10239816	7	81821760	T	G	-0.07657	0.07789
Ovarian (mucinous, borderline & invasive)	rs145168020	7	81853772	T	C	0.2198	0.07905
Ovarian (mucinous, borderline)	rs73149798	7	80982822	T	A	-0.1309	0.116
Ovarian (mucinous, borderline)	rs2967922	7	81048444	G	A	-0.1055	0.09556
Ovarian (mucinous, borderline)	rs7788796	7	81129093	C	T	0.0129	0.1297
Ovarian (mucinous, borderline)	rs5745687	7	81359051	T	C	0.05374	0.09216
Ovarian (mucinous, borderline)	rs10239816	7	81821760	T	G	0.02929	0.111
Ovarian (mucinous, borderline)	rs145168020	7	81853772	T	C	0.2869	0.1136
Ovarian (serous, borderline & invasive LG)	rs73149798	7	80982822	T	A	0.0693	0.0795
Ovarian (serous, borderline & invasive LG)	rs2967922	7	81048444	G	A	0.0988	0.06554
Ovarian (serous, borderline & invasive LG)	rs7788796	7	81129093	C	T	-0.09503	0.08227
Ovarian (serous, borderline & invasive LG)	rs5745687	7	81359051	T	C	-0.05745	0.06165
Ovarian (serous, borderline & invasive LG)	rs10239816	7	81821760	T	G	0.03089	0.07295
Ovarian (serous, borderline & invasive LG)	rs145168020	7	81853772	T	C	-0.1026	0.08292
Ovarian Serous (invasive LG & HG)	rs73149798	7	80982822	T	A	-0.0846	0.04066
Ovarian Serous (invasive LG & HG)	rs2967922	7	81048444	G	A	-0.02275	0.03388
Ovarian Serous (invasive LG & HG)	rs7788796	7	81129093	C	T	-0.005151	0.0441
Ovarian Serous (invasive LG & HG)	rs5745687	7	81359051	T	C	-0.01244	0.03262
Ovarian Serous (invasive LG & HG)	rs10239816	7	81821760	T	G	0.0185	0.03863
Ovarian Serous (invasive LG & HG)	rs145168020	7	81853772	T	C	0.02086	0.04228
Ovarian (serous, invasive HG)	rs73149798	7	80982822	T	A	-0.08528	0.0418
Ovarian (serous, invasive HG)	rs2967922	7	81048444	G	A	-0.03266	0.03476
Ovarian (serous, invasive HG)	rs7788796	7	81129093	C	T	0.01144	0.0455
Ovarian (serous, invasive HG)	rs5745687	7	81359051	T	C	-0.02406	0.03359
Ovarian (serous, invasive HG)	rs10239816	7	81821760	T	G	0.0226	0.0397
Ovarian (serous, invasive HG)	rs145168020	7	81853772	T	C	0.03389	0.04334
Ovarian (serous, borderline)	rs73149798	7	80982822	T	A	0.1467	0.09786
Ovarian (serous, borderline)	rs2967922	7	81048444	G	A	0.1167	0.07907
Ovarian (serous, borderline)	rs7788796	7	81129093	C	T	-0.008476	0.1021
Ovarian (serous, borderline)	rs5745687	7	81359051	T	C	-0.1299	0.0754
Ovarian (serous, borderline)	rs10239816	7	81821760	T	G	0.06907	0.08788
Ovarian (serous, borderline)	rs145168020	7	81853772	T	C	-0.06975	0.09889
Ovarian (serous, invasive LG)	rs73149798	7	80982822	T	A	-0.06829	0.1288
Ovarian (serous, invasive LG)	rs2967922	7	81048444	G	A	0.05682	0.1103
Ovarian (serous, invasive LG)	rs7788796	7	81129093	C	T	-0.1896	0.1323
Ovarian (serous, invasive LG)	rs5745687	7	81359051	T	C	0.08371	0.1006
Ovarian (serous, invasive LG)	rs10239816	7	81821760	T	G	-0.06177	0.1231
Ovarian (serous, invasive LG)	rs145168020	7	81853772	T	C	-0.1559	0.1431
Prostate (overall)	rs73149798	7	80982822	A	T	0.0037	0.021
Prostate (overall)	rs2967922	7	81048444	A	G	-0.0023	0.0177
Prostate (overall)	rs7788796	7	81129093	T	C	0.0355	0.0235
Prostate (overall)	rs5745687	7	81359051	T	C	-0.0217	0.0174
Prostate (overall)	rs10239816	7	81821760	T	G	-0.0199	0.021
Prostate (overall)	rs145168020	7	81853772	T	C	0.0166	0.0218
Prostate (advanced)	rs73149798	7	80982822	A	T	0.0193	0.036
Prostate (advanced)	rs2967922	7	81048444	A	G	-0.0123	0.0305
Prostate (advanced)	rs7788796	7	81129093	T	C	-0.0113	0.0392
Prostate (advanced)	rs5745687	7	81359051	T	C	-0.0162	0.03
Prostate (advanced)	rs10239816	7	81821760	T	G	-0.0167	0.0359
Prostate (advanced)	rs145168020	7	81853772	T	C	0.0212	0.038
Prostate (high vs low risk)	rs73149798	7	80982822	A	T	0.0356	0.0526
Prostate (high vs low risk)	rs2967922	7	81048444	A	G	0.0907	0.0444
Prostate (high vs low risk)	rs7788796	7	81129093	T	C	-0.0761	0.0586
Prostate (high vs low risk)	rs5745687	7	81359051	T	C	0.0272	0.0438
Prostate (high vs low risk)	rs10239816	7	81821760	T	G	0.0556	0.0539
Prostate (high vs low risk)	rs145168020	7	81853772	T	C	0.0172	0.0554
Prostate (high vs low+int risk)	rs73149798	7	80982822	A	T	0.0403	0.034
Prostate (high vs low+int risk)	rs2967922	7	81048444	A	G	0.0213	0.0287
Prostate (high vs low+int risk)	rs7788796	7	81129093	T	C	-0.0386	0.0379
Prostate (high vs low+int risk)	rs5745687	7	81359051	T	C	0.0216	0.0281
Prostate (high vs low+int risk)	rs10239816	7	81821760	T	G	0.0481	0.0342
Prostate (high vs low+int risk)	rs145168020	7	81853772	T	C	-0.0358	0.0351
Breast (overall)	rs34740816	3	159965219	A	G	-0.00896053	0.0102077
Breast (HER2 enriched)	rs34740816	3	159965219	A	G	-0.011734	0.0425593
Breast (luminal A)	rs34740816	3	159965219	A	G	-0.0141752	0.0133215
Breast (luminal B)	rs34740816	3	159965219	A	G	-0.00367331	0.0291835
Breast (luminal B, HER2 neg.)	rs34740816	3	159965219	A	G	-0.00815279	0.025055
Breast (triple negative)	rs34740816	3	159965219	A	G	0.00220896	0.0256521
Ovarian (overall, MA incl. CIMBA)	rs34740816	3	159965219	A	G	0.013	0.0187
Ovarian (serous, MA incl. CIMBA)	rs34740816	3	159965219	A	G	0.0136	0.0209
Endometrial (overall)	rs34740816	3	159965219	A	G	-0.0276921	0.0248269
Endometrial (endometrioid)	rs34740816	3	159965219	A	G	-0.0206683	0.029439
Endometrial (non-endometrioid)	rs34740816	3	159965219	A	G	-0.0113035	0.0708161
Lung (adenocarcinoma)	rs34740816	3	159965219	A	G	-0.00132312	0.027379
Lung (ever smokers)	rs34740816	3	159965219	A	G	0.0131389	0.025356
Lung (never smokers)	rs34740816	3	159965219	A	G	0.0452129	0.058482
Lung (overall)	rs34740816	3	159965219	A	G	0.0151614	0.020193
Lung (small cell)	rs34740816	3	159965219	A	G	0.00084836	0.050232
Lung (squamous cell)	rs34740816	3	159965219	A	G	0.0370883	0.032325
Ovarian (overall, invasive)	rs34740816	3	159965219	A	G	0.01351	0.02116
Ovarian (clearcell, invasive)	rs34740816	3	159965219	A	G	0.01384	0.06413
Ovarian (endometrioid, invasive)	rs34740816	3	159965219	A	G	0.03775	0.046
Ovarian (borderline)	rs34740816	3	159965219	A	G	0.01041	0.04505
Ovarian (mucinous, invasive)	rs34740816	3	159965219	A	G	0.06827	0.06408
Ovarian (mucinous, borderline & invasive)	rs34740816	3	159965219	A	G	0.0299	0.04807
Ovarian (mucinous, borderline)	rs34740816	3	159965219	A	G	-0.01027	0.07003
Ovarian (serous, borderline & invasive LG)	rs34740816	3	159965219	A	G	-0.01272	0.04593
Ovarian Serous (invasive LG & HG)	rs34740816	3	159965219	A	G	0.01442	0.02446
Ovarian (serous, invasive HG)	rs34740816	3	159965219	A	G	0.02141	0.02517
Ovarian (serous, borderline)	rs34740816	3	159965219	A	G	0.02183	0.05564
Ovarian (serous, invasive LG)	rs34740816	3	159965219	A	G	-0.09668	0.07644
Prostate (overall)	rs34740816	3	159965219	A	G	0.0325	0.0135
Prostate (advanced)	rs34740816	3	159965219	A	G	0.0247	0.0231
Prostate (high vs low risk)	rs34740816	3	159965219	A	G	-0.0222	0.0333
Prostate (high vs low+int risk)	rs34740816	3	159965219	A	G	-0.0566	0.0216
Breast (overall)	rs1848707	15	81421792	G	A	0.0033408	0.00671688
Breast (overall)	rs35000575	15	81439638	A	C	0.00586742	0.0093867
Breast (overall)	rs35254208	15	81481945	A	T	0.0108603	0.00971001
Breast (overall)	rs75824993	15	81494541	A	C	-0.0204553	0.0111208
Breast (overall)	rs4128767	15	81543407	G	A	-0.0103143	0.00650587
Breast (overall)	rs7170924	15	81583139	T	G	0.00543359	0.00716981
Breast (overall)	rs4778890	15	81589648	G	C	0.0115135	0.0128981
Breast (overall)	rs3848180	15	81596590	G	T	-0.00548757	0.00617821
Breast (overall)	rs4778893	15	81611253	A	G	0.00328027	0.00866137
Breast (overall)	rs6495562	15	81612117	T	C	0.0121146	0.0128531
Breast (overall)	rs4611404	15	81613766	C	T	-0.00465644	0.0148303
Breast (overall)	rs75194383	15	81664543	G	T	-0.000302218	0.0147878
Breast (overall)	rs58484457	15	81769674	C	T	0.0147631	0.00702903
Breast (overall)	rs116947254	15	81786092	A	G	0.00739422	0.0148148
Breast (overall)	rs1482937	15	81811499	G	C	0.00932584	0.00775818
Breast (overall)	rs12913587	15	81836114	A	G	-0.0177198	0.00648692
Breast (overall)	rs7179124	15	81960730	G	C	-0.0122527	0.00669523
Breast (HER2 enriched)	rs116947254	15	81786092	A	G	-0.0799072	0.0646375
Breast (HER2 enriched)	rs12913587	15	81836114	A	G	-0.0176249	0.0271655
Breast (HER2 enriched)	rs1482937	15	81811499	G	C	-0.0246609	0.0325612
Breast (HER2 enriched)	rs1848707	15	81421792	G	A	-0.0279394	0.0281975
Breast (HER2 enriched)	rs35000575	15	81439638	A	C	-0.00419308	0.0400922
Breast (HER2 enriched)	rs35254208	15	81481945	A	T	-0.00339848	0.0402887
Breast (HER2 enriched)	rs3848180	15	81596590	G	T	-0.0238049	0.0261899
Breast (HER2 enriched)	rs4128767	15	81543407	G	A	-0.0328406	0.0274773
Breast (HER2 enriched)	rs4611404	15	81613766	C	T	-0.0797854	0.0601517
Breast (HER2 enriched)	rs4778890	15	81589648	G	C	0.0711758	0.0562778
Breast (HER2 enriched)	rs4778893	15	81611253	A	G	-0.00089261	0.0365473
Breast (HER2 enriched)	rs58484457	15	81769674	C	T	0.00317281	0.029552
Breast (HER2 enriched)	rs6495562	15	81612117	T	C	0.0282942	0.0552767
Breast (HER2 enriched)	rs7170924	15	81583139	T	G	-0.0268732	0.0307699
Breast (HER2 enriched)	rs7179124	15	81960730	G	C	-9.71995e-05	0.0283621
Breast (HER2 enriched)	rs75194383	15	81664543	G	T	0.0313428	0.0625498
Breast (HER2 enriched)	rs75824993	15	81494541	A	C	-0.115609	0.0491964
Breast (luminal A)	rs116947254	15	81786092	A	G	0.00428231	0.0193022
Breast (luminal A)	rs12913587	15	81836114	A	G	-0.0170094	0.00856749
Breast (luminal A)	rs1482937	15	81811499	G	C	0.0270512	0.0103044
Breast (luminal A)	rs1848707	15	81421792	G	A	-0.000584761	0.00883436
Breast (luminal A)	rs35000575	15	81439638	A	C	-0.00441322	0.0124166
Breast (luminal A)	rs35254208	15	81481945	A	T	0.0169156	0.0125687
Breast (luminal A)	rs3848180	15	81596590	G	T	-0.0087525	0.00813794
Breast (luminal A)	rs4128767	15	81543407	G	A	-0.00626604	0.00854945
Breast (luminal A)	rs4611404	15	81613766	C	T	-0.0107722	0.0195212
Breast (luminal A)	rs4778890	15	81589648	G	C	0.016383	0.0172041
Breast (luminal A)	rs4778893	15	81611253	A	G	0.00441031	0.0114542
Breast (luminal A)	rs58484457	15	81769674	C	T	0.011851	0.00927249
Breast (luminal A)	rs6495562	15	81612117	T	C	0.0241024	0.0170803
Breast (luminal A)	rs7170924	15	81583139	T	G	-0.00026859	0.00944778
Breast (luminal A)	rs7179124	15	81960730	G	C	-0.00765017	0.00882166
Breast (luminal A)	rs75194383	15	81664543	G	T	0.00633968	0.0194388
Breast (luminal A)	rs75824993	15	81494541	A	C	-0.0305424	0.0146818
Breast (luminal B)	rs116947254	15	81786092	A	G	-0.0814537	0.0440996
Breast (luminal B)	rs12913587	15	81836114	A	G	-0.0474017	0.0186148
Breast (luminal B)	rs1482937	15	81811499	G	C	0.00207431	0.022612
Breast (luminal B)	rs1848707	15	81421792	G	A	-0.000916643	0.019126
Breast (luminal B)	rs35000575	15	81439638	A	C	0.00130777	0.027362
Breast (luminal B)	rs35254208	15	81481945	A	T	0.0289649	0.0272649
Breast (luminal B)	rs3848180	15	81596590	G	T	0.0219709	0.0180627
Breast (luminal B)	rs4128767	15	81543407	G	A	0.00574439	0.0189417
Breast (luminal B)	rs4611404	15	81613766	C	T	-0.0166583	0.042338
Breast (luminal B)	rs4778890	15	81589648	G	C	0.0277318	0.0377194
Breast (luminal B)	rs4778893	15	81611253	A	G	-0.0301117	0.025274
Breast (luminal B)	rs58484457	15	81769674	C	T	0.00473555	0.0202749
Breast (luminal B)	rs6495562	15	81612117	T	C	-0.0115401	0.0368071
Breast (luminal B)	rs7170924	15	81583139	T	G	-0.0118657	0.0210138
Breast (luminal B)	rs7179124	15	81960730	G	C	-0.00779382	0.0195078
Breast (luminal B)	rs75194383	15	81664543	G	T	-0.0296981	0.0420738
Breast (luminal B)	rs75824993	15	81494541	A	C	-0.0271541	0.0327923
Breast (luminal B, HER2 neg.)	rs116947254	15	81786092	A	G	0.0360316	0.036092
Breast (luminal B, HER2 neg.)	rs12913587	15	81836114	A	G	-0.00275777	0.0161452
Breast (luminal B, HER2 neg.)	rs1482937	15	81811499	G	C	0.0018288	0.0194397
Breast (luminal B, HER2 neg.)	rs1848707	15	81421792	G	A	0.00363088	0.0165666
Breast (luminal B, HER2 neg.)	rs35000575	15	81439638	A	C	0.00920653	0.0234026
Breast (luminal B, HER2 neg.)	rs35254208	15	81481945	A	T	-0.00038966	0.0237458
Breast (luminal B, HER2 neg.)	rs3848180	15	81596590	G	T	0.0076831	0.0154371
Breast (luminal B, HER2 neg.)	rs4128767	15	81543407	G	A	-0.0126489	0.0161482
Breast (luminal B, HER2 neg.)	rs4611404	15	81613766	C	T	0.0426236	0.0375193
Breast (luminal B, HER2 neg.)	rs4778890	15	81589648	G	C	-0.04491	0.0316419
Breast (luminal B, HER2 neg.)	rs4778893	15	81611253	A	G	0.0393689	0.0213633
Breast (luminal B, HER2 neg.)	rs58484457	15	81769674	C	T	0.0371267	0.0176216
Breast (luminal B, HER2 neg.)	rs6495562	15	81612117	T	C	-0.0117793	0.0318693
Breast (luminal B, HER2 neg.)	rs7170924	15	81583139	T	G	0.0271515	0.0177862
Breast (luminal B, HER2 neg.)	rs7179124	15	81960730	G	C	-0.0111688	0.0167417
Breast (luminal B, HER2 neg.)	rs75194383	15	81664543	G	T	0.00647245	0.0368111
Breast (luminal B, HER2 neg.)	rs75824993	15	81494541	A	C	-0.000739494	0.0277944
Breast (triple negative)	rs116947254	15	81786092	A	G	0.00590477	0.0371346
Breast (triple negative)	rs12913587	15	81836114	A	G	-0.0124211	0.0163563
Breast (triple negative)	rs1482937	15	81811499	G	C	0.0131296	0.0196868
Breast (triple negative)	rs1848707	15	81421792	G	A	-0.00271043	0.0169194
Breast (triple negative)	rs35000575	15	81439638	A	C	-0.00133552	0.0239267
Breast (triple negative)	rs35254208	15	81481945	A	T	0.00910483	0.0240733
Breast (triple negative)	rs3848180	15	81596590	G	T	-0.0200227	0.0156105
Breast (triple negative)	rs4128767	15	81543407	G	A	-0.00515288	0.016455
Breast (triple negative)	rs4611404	15	81613766	C	T	-0.00872813	0.0372812
Breast (triple negative)	rs4778890	15	81589648	G	C	0.00648194	0.0329953
Breast (triple negative)	rs4778893	15	81611253	A	G	-0.0329387	0.02219
Breast (triple negative)	rs58484457	15	81769674	C	T	0.00261639	0.0177456
Breast (triple negative)	rs6495562	15	81612117	T	C	-0.0393783	0.0321352
Breast (triple negative)	rs7170924	15	81583139	T	G	-0.000764891	0.018168
Breast (triple negative)	rs7179124	15	81960730	G	C	-0.00676102	0.0169522
Breast (triple negative)	rs75194383	15	81664543	G	T	0.00315538	0.037078
Breast (triple negative)	rs75824993	15	81494541	A	C	0.00485506	0.0279743
Ovarian (overall, MA incl. CIMBA)	rs1848707	15	81421792	A	G	-0.0099	0.0125
Ovarian (overall, MA incl. CIMBA)	rs35000575	15	81439638	A	C	-0.0051	0.0182
Ovarian (overall, MA incl. CIMBA)	rs35254208	15	81481945	A	T	0.0291	0.0179
Ovarian (overall, MA incl. CIMBA)	rs75824993	15	81494541	A	C	-0.0285	0.0216
Ovarian (overall, MA incl. CIMBA)	rs4128767	15	81543407	A	G	0.0189	0.0127
Ovarian (overall, MA incl. CIMBA)	rs7170924	15	81583139	T	G	-0.0106	0.014
Ovarian (overall, MA incl. CIMBA)	rs4778890	15	81589648	C	G	-0.0116	0.0243
Ovarian (overall, MA incl. CIMBA)	rs3848180	15	81596590	T	G	0.0281	0.0119
Ovarian (overall, MA incl. CIMBA)	rs4778893	15	81611253	A	G	-0.0093	0.0165
Ovarian (overall, MA incl. CIMBA)	rs6495562	15	81612117	T	C	-0.0206	0.0243
Ovarian (overall, MA incl. CIMBA)	rs4611404	15	81613766	T	C	0.0255	0.0276
Ovarian (overall, MA incl. CIMBA)	rs75194383	15	81664543	T	G	-0.0112	0.0279
Ovarian (overall, MA incl. CIMBA)	rs58484457	15	81769674	T	C	-0.0108	0.0133
Ovarian (overall, MA incl. CIMBA)	rs116947254	15	81786092	A	G	-0.0305	0.0282
Ovarian (overall, MA incl. CIMBA)	rs1482937	15	81811499	C	G	-0.0302	0.0149
Ovarian (overall, MA incl. CIMBA)	rs12913587	15	81836114	A	G	-0.0037	0.0123
Ovarian (overall, MA incl. CIMBA)	rs7179124	15	81960730	C	G	-0.0035	0.013
Ovarian (serous, MA incl. CIMBA)	rs1848707	15	81421792	A	G	-0.0051	0.0139
Ovarian (serous, MA incl. CIMBA)	rs35000575	15	81439638	A	C	-0.0042	0.0203
Ovarian (serous, MA incl. CIMBA)	rs35254208	15	81481945	A	T	0.0333	0.02
Ovarian (serous, MA incl. CIMBA)	rs75824993	15	81494541	A	C	-0.0306	0.0241
Ovarian (serous, MA incl. CIMBA)	rs4128767	15	81543407	A	G	0.0139	0.0141
Ovarian (serous, MA incl. CIMBA)	rs7170924	15	81583139	T	G	-0.0114	0.0156
Ovarian (serous, MA incl. CIMBA)	rs4778890	15	81589648	C	G	0	0.0271
Ovarian (serous, MA incl. CIMBA)	rs3848180	15	81596590	T	G	0.0353	0.0133
Ovarian (serous, MA incl. CIMBA)	rs4778893	15	81611253	A	G	-0.0087	0.0183
Ovarian (serous, MA incl. CIMBA)	rs6495562	15	81612117	T	C	-0.0145	0.0271
Ovarian (serous, MA incl. CIMBA)	rs4611404	15	81613766	T	C	0.0314	0.0308
Ovarian (serous, MA incl. CIMBA)	rs75194383	15	81664543	T	G	0.0048	0.0311
Ovarian (serous, MA incl. CIMBA)	rs58484457	15	81769674	T	C	-0.0051	0.0148
Ovarian (serous, MA incl. CIMBA)	rs116947254	15	81786092	A	G	-0.037	0.0314
Ovarian (serous, MA incl. CIMBA)	rs1482937	15	81811499	C	G	-0.022	0.0166
Ovarian (serous, MA incl. CIMBA)	rs12913587	15	81836114	A	G	-0.0039	0.0137
Ovarian (serous, MA incl. CIMBA)	rs7179124	15	81960730	C	G	-0.0025	0.0144
Endometrial (overall)	rs1848707	15	81421792	G	A	-0.00974951	0.0165162
Endometrial (overall)	rs35000575	15	81439638	A	C	-0.0167745	0.0234426
Endometrial (overall)	rs35254208	15	81481945	A	T	-0.0335459	0.0241852
Endometrial (overall)	rs75824993	15	81494541	A	C	0.00452123	0.0274439
Endometrial (overall)	rs4128767	15	81543407	G	A	-0.00725781	0.0164167
Endometrial (overall)	rs7170924	15	81583139	T	G	-0.0148877	0.018132
Endometrial (overall)	rs4778890	15	81589648	G	C	0.00215237	0.0304574
Endometrial (overall)	rs3848180	15	81596590	G	T	-0.00594439	0.0154414
Endometrial (overall)	rs4778893	15	81611253	A	G	0.000609888	0.021527
Endometrial (overall)	rs6495562	15	81612117	T	C	-0.0218592	0.0309751
Endometrial (overall)	rs4611404	15	81613766	C	T	0.0221369	0.0365127
Endometrial (overall)	rs75194383	15	81664543	G	T	0.0187297	0.0361976
Endometrial (overall)	rs58484457	15	81769674	C	T	-0.0134552	0.0172014
Endometrial (overall)	rs116947254	15	81786092	A	G	-0.0141964	0.0359001
Endometrial (overall)	rs1482937	15	81811499	G	C	-0.0121877	0.019084
Endometrial (overall)	rs12913587	15	81836114	A	G	-0.0137101	0.0160341
Endometrial (overall)	rs7179124	15	81960730	G	C	0.048809	0.0167126
Endometrial (endometrioid)	rs1848707	15	81421792	G	A	-0.00157989	0.0194914
Endometrial (endometrioid)	rs35000575	15	81439638	A	C	-0.0145611	0.0277751
Endometrial (endometrioid)	rs35254208	15	81481945	A	T	-0.013311	0.0289172
Endometrial (endometrioid)	rs75824993	15	81494541	A	C	0.0178147	0.0326801
Endometrial (endometrioid)	rs4128767	15	81543407	G	A	-0.00332882	0.0193173
Endometrial (endometrioid)	rs7170924	15	81583139	T	G	-0.026481	0.0213402
Endometrial (endometrioid)	rs4778890	15	81589648	G	C	-0.0240113	0.0360572
Endometrial (endometrioid)	rs3848180	15	81596590	G	T	-0.0175861	0.0181854
Endometrial (endometrioid)	rs4778893	15	81611253	A	G	-0.00330323	0.0254651
Endometrial (endometrioid)	rs6495562	15	81612117	T	C	1.87981e-05	0.0367819
Endometrial (endometrioid)	rs4611404	15	81613766	C	T	3.2733e-05	0.0435016
Endometrial (endometrioid)	rs75194383	15	81664543	G	T	0.00236907	0.0428127
Endometrial (endometrioid)	rs58484457	15	81769674	C	T	-0.00624509	0.0203238
Endometrial (endometrioid)	rs116947254	15	81786092	A	G	-0.0174951	0.0428623
Endometrial (endometrioid)	rs1482937	15	81811499	G	C	-0.00766184	0.0225542
Endometrial (endometrioid)	rs12913587	15	81836114	A	G	-0.00616121	0.0189966
Endometrial (endometrioid)	rs7179124	15	81960730	G	C	0.0550821	0.0196523
Endometrial (non-endometrioid)	rs1848707	15	81421792	G	A	-0.0428514	0.0484759
Endometrial (non-endometrioid)	rs35000575	15	81439638	A	C	-0.0783577	0.0688269
Endometrial (non-endometrioid)	rs35254208	15	81481945	A	T	-0.0597511	0.07032
Endometrial (non-endometrioid)	rs75824993	15	81494541	A	C	0.0194654	0.0797339
Endometrial (non-endometrioid)	rs4128767	15	81543407	G	A	-0.0881071	0.0461095
Endometrial (non-endometrioid)	rs7170924	15	81583139	T	G	0.0279618	0.0517095
Endometrial (non-endometrioid)	rs4778890	15	81589648	G	C	-0.0711588	0.0899858
Endometrial (non-endometrioid)	rs3848180	15	81596590	G	T	-0.0108328	0.0446077
Endometrial (non-endometrioid)	rs4778893	15	81611253	A	G	-0.00866094	0.062976
Endometrial (non-endometrioid)	rs6495562	15	81612117	T	C	-0.128776	0.0870938
Endometrial (non-endometrioid)	rs4611404	15	81613766	C	T	0.037142	0.109012
Endometrial (non-endometrioid)	rs75194383	15	81664543	G	T	0.0721743	0.109743
Endometrial (non-endometrioid)	rs58484457	15	81769674	C	T	0.004302	0.0504875
Endometrial (non-endometrioid)	rs116947254	15	81786092	A	G	-0.0168962	0.103913
Endometrial (non-endometrioid)	rs1482937	15	81811499	G	C	-0.00113048	0.0557696
Endometrial (non-endometrioid)	rs12913587	15	81836114	A	G	-0.0559654	0.0465219
Endometrial (non-endometrioid)	rs7179124	15	81960730	G	C	0.0779628	0.0480325
Lung (adenocarcinoma)	rs1848707	15	81421792	A	G	-0.0103292	0.017518
Lung (adenocarcinoma)	rs35000575	15	81439638	A	C	-0.0185734	0.025571
Lung (adenocarcinoma)	rs75824993	15	81494541	A	C	-0.0547445	0.031272
Lung (adenocarcinoma)	rs4128767	15	81543407	G	A	0.00635113	0.0173
Lung (adenocarcinoma)	rs7170924	15	81583139	T	G	0.00578424	0.019143
Lung (adenocarcinoma)	rs4778890	15	81589648	G	C	0.0553446	0.033466
Lung (adenocarcinoma)	rs3848180	15	81596590	G	T	0.0118722	0.016304
Lung (adenocarcinoma)	rs4778893	15	81611253	A	G	0.0161696	0.021886
Lung (adenocarcinoma)	rs6495562	15	81612117	C	T	0.00226657	0.034452
Lung (adenocarcinoma)	rs4611404	15	81613766	C	T	-0.00720995	0.037053
Lung (adenocarcinoma)	rs75194383	15	81664543	G	T	-0.0448185	0.039381
Lung (adenocarcinoma)	rs58484457	15	81769674	C	T	-0.0253597	0.018177
Lung (adenocarcinoma)	rs116947254	15	81786092	A	G	0.0995865	0.03926
Lung (adenocarcinoma)	rs1482937	15	81811499	G	C	0.00263246	0.020359
Lung (adenocarcinoma)	rs12913587	15	81836114	G	A	0.0270342	0.016745
Lung (adenocarcinoma)	rs7179124	15	81960730	C	G	-0.0182118	0.017758
Lung (ever smokers)	rs1848707	15	81421792	A	G	0.00182433	0.016347
Lung (ever smokers)	rs35000575	15	81439638	A	C	-0.0404106	0.023949
Lung (ever smokers)	rs35254208	15	81481945	A	T	0.0121598	0.025512
Lung (ever smokers)	rs75824993	15	81494541	A	C	-0.0267445	0.028812
Lung (ever smokers)	rs4128767	15	81543407	G	A	0.024513	0.015908
Lung (ever smokers)	rs7170924	15	81583139	T	G	-0.0142511	0.017404
Lung (ever smokers)	rs4778890	15	81589648	G	C	0.0548332	0.030852
Lung (ever smokers)	rs3848180	15	81596590	G	T	0.013449	0.01494
Lung (ever smokers)	rs4778893	15	81611253	A	G	0.00229038	0.020095
Lung (ever smokers)	rs6495562	15	81612117	C	T	0.0200537	0.031168
Lung (ever smokers)	rs4611404	15	81613766	C	T	-0.0102701	0.03472
Lung (ever smokers)	rs75194383	15	81664543	G	T	-0.00795626	0.036919
Lung (ever smokers)	rs58484457	15	81769674	C	T	-0.00837384	0.016869
Lung (ever smokers)	rs116947254	15	81786092	A	G	0.073428	0.03747
Lung (ever smokers)	rs1482937	15	81811499	G	C	0.0230588	0.018646
Lung (ever smokers)	rs12913587	15	81836114	G	A	0.0166824	0.015332
Lung (ever smokers)	rs7179124	15	81960730	C	G	-0.0278533	0.016391
Lung (never smokers)	rs1848707	15	81421792	A	G	-0.0315278	0.037683
Lung (never smokers)	rs35000575	15	81439638	A	C	-0.0270455	0.054928
Lung (never smokers)	rs35254208	15	81481945	A	T	-0.0158581	0.056921
Lung (never smokers)	rs55889255	15	81516565	G	A	0.0400005	0.068289
Lung (never smokers)	rs4128767	15	81543407	G	A	-0.0264452	0.037594
Lung (never smokers)	rs7170924	15	81583139	T	G	0.0254465	0.041843
Lung (never smokers)	rs4778890	15	81589648	G	C	0.0448719	0.077148
Lung (never smokers)	rs3848180	15	81596590	G	T	0.00397991	0.035499
Lung (never smokers)	rs4778893	15	81611253	A	G	-0.0643465	0.047643
Lung (never smokers)	rs6495562	15	81612117	C	T	-0.00964038	0.074194
Lung (never smokers)	rs4611404	15	81613766	C	T	-0.0748059	0.080024
Lung (never smokers)	rs75194383	15	81664543	G	T	-0.100048	0.085084
Lung (never smokers)	rs58484457	15	81769674	C	T	-0.0846472	0.039606
Lung (never smokers)	rs116947254	15	81786092	A	G	0.159895	0.084452
Lung (never smokers)	rs1482937	15	81811499	G	C	0.0147015	0.044688
Lung (never smokers)	rs12913587	15	81836114	G	A	0.0447474	0.03601
Lung (never smokers)	rs7179124	15	81960730	C	G	0.0290548	0.038591
Lung (overall)	rs1848707	15	81421792	A	G	-0.00812089	0.012823
Lung (overall)	rs35000575	15	81439638	A	C	-0.0329861	0.018666
Lung (overall)	rs35254208	15	81481945	A	T	0.0257789	0.019653
Lung (overall)	rs75824993	15	81494541	A	C	-0.0360283	0.022719
Lung (overall)	rs4128767	15	81543407	G	A	0.0185204	0.012557
Lung (overall)	rs7170924	15	81583139	T	G	-0.00538145	0.013856
Lung (overall)	rs4778890	15	81589648	G	C	0.0445623	0.023995
Lung (overall)	rs3848180	15	81596590	G	T	0.00956661	0.011787
Lung (overall)	rs4778893	15	81611253	A	G	-0.0125798	0.015914
Lung (overall)	rs6495562	15	81612117	C	T	0.00423596	0.02486
Lung (overall)	rs4611404	15	81613766	C	T	0.00286009	0.027264
Lung (overall)	rs75194383	15	81664543	G	T	-0.0172228	0.029047
Lung (overall)	rs58484457	15	81769674	C	T	-0.0110359	0.01324
Lung (overall)	rs116947254	15	81786092	A	G	0.0565797	0.028759
Lung (overall)	rs12913587	15	81836114	G	A	0.00663396	0.012165
Lung (overall)	rs7179124	15	81960730	C	G	-0.0145219	0.012848
Lung (small cell)	rs1848707	15	81421792	A	G	-0.0121819	0.032368
Lung (small cell)	rs35000575	15	81439638	A	C	-0.0211215	0.047369
Lung (small cell)	rs35254208	15	81481945	A	T	0.038711	0.051201
Lung (small cell)	rs75824993	15	81494541	A	C	0.0652539	0.056628
Lung (small cell)	rs4128767	15	81543407	G	A	0.0553721	0.031993
Lung (small cell)	rs7170924	15	81583139	T	G	-0.0163174	0.035228
Lung (small cell)	rs4778890	15	81589648	G	C	-0.0491092	0.060229
Lung (small cell)	rs3848180	15	81596590	G	T	0.00520754	0.030067
Lung (small cell)	rs4778893	15	81611253	A	G	-0.052631	0.040486
Lung (small cell)	rs6495562	15	81612117	C	T	-0.0355602	0.061947
Lung (small cell)	rs4611404	15	81613766	C	T	-0.0288275	0.07105
Lung (small cell)	rs75194383	15	81664543	G	T	-0.0305738	0.072388
Lung (small cell)	rs58484457	15	81769674	C	T	0.0573145	0.033821
Lung (small cell)	rs12913587	15	81836114	G	A	-0.0306407	0.030473
Lung (small cell)	rs7179124	15	81960730	C	G	0.00034694	0.032378
Lung (squamous cell)	rs1848707	15	81421792	A	G	-0.0241667	0.020585
Lung (squamous cell)	rs35000575	15	81439638	A	C	-0.0434014	0.030074
Lung (squamous cell)	rs35254208	15	81481945	A	T	0.0170302	0.031774
Lung (squamous cell)	rs75824993	15	81494541	A	C	-0.071264	0.036508
Lung (squamous cell)	rs4128767	15	81543407	G	A	0.0204293	0.020151
Lung (squamous cell)	rs7170924	15	81583139	T	G	-0.0311512	0.022245
Lung (squamous cell)	rs4778890	15	81589648	G	C	0.051627	0.038948
Lung (squamous cell)	rs3848180	15	81596590	G	T	-0.000127992	0.018883
Lung (squamous cell)	rs4778893	15	81611253	A	G	-0.0274699	0.025564
Lung (squamous cell)	rs6495562	15	81612117	C	T	0.056691	0.03967
Lung (squamous cell)	rs4611404	15	81613766	C	T	-0.0366434	0.043803
Lung (squamous cell)	rs75194383	15	81664543	G	T	-0.0124097	0.046704
Lung (squamous cell)	rs58484457	15	81769674	C	T	0.000215023	0.021276
Lung (squamous cell)	rs116947254	15	81786092	A	G	0.0408866	0.047442
Lung (squamous cell)	rs1482937	15	81811499	G	C	0.0288059	0.023619
Lung (squamous cell)	rs12913587	15	81836114	G	A	-0.0111318	0.019369
Lung (squamous cell)	rs7179124	15	81960730	C	G	-0.0149258	0.020646
Ovarian (overall, invasive)	rs1848707	15	81421792	G	A	-0.01176	0.01414
Ovarian (overall, invasive)	rs35000575	15	81439638	A	C	-0.0001097	0.02053
Ovarian (overall, invasive)	rs35254208	15	81481945	A	T	0.02183	0.02031
Ovarian (overall, invasive)	rs75824993	15	81494541	A	C	-0.02899	0.02435
Ovarian (overall, invasive)	rs4128767	15	81543407	G	A	0.02202	0.01437
Ovarian (overall, invasive)	rs7170924	15	81583139	T	G	-0.008053	0.01582
Ovarian (overall, invasive)	rs4778890	15	81589648	G	C	-0.02088	0.02738
Ovarian (overall, invasive)	rs3848180	15	81596590	G	T	0.02434	0.0135
Ovarian (overall, invasive)	rs4778893	15	81611253	A	G	-0.001843	0.01863
Ovarian (overall, invasive)	rs6495562	15	81612117	T	C	-0.01662	0.02726
Ovarian (overall, invasive)	rs4611404	15	81613766	C	T	0.04578	0.03168
Ovarian (overall, invasive)	rs75194383	15	81664543	G	T	-0.04478	0.03156
Ovarian (overall, invasive)	rs58484457	15	81769674	C	T	-0.009781	0.01503
Ovarian (overall, invasive)	rs116947254	15	81786092	A	G	-0.02074	0.03198
Ovarian (overall, invasive)	rs1482937	15	81811499	G	C	-0.02931	0.01688
Ovarian (overall, invasive)	rs12913587	15	81836114	A	G	-0.006592	0.0139
Ovarian (overall, invasive)	rs7179124	15	81960730	G	C	-0.01063	0.01467
Ovarian (clearcell, invasive)	rs1848707	15	81421792	G	A	-0.02531	0.0425
Ovarian (clearcell, invasive)	rs35000575	15	81439638	A	C	-0.002297	0.06222
Ovarian (clearcell, invasive)	rs35254208	15	81481945	A	T	0.02774	0.06058
Ovarian (clearcell, invasive)	rs75824993	15	81494541	A	C	0.06174	0.07197
Ovarian (clearcell, invasive)	rs4128767	15	81543407	G	A	0.06039	0.04388
Ovarian (clearcell, invasive)	rs7170924	15	81583139	T	G	0.001716	0.04805
Ovarian (clearcell, invasive)	rs4778890	15	81589648	G	C	-0.08423	0.08005
Ovarian (clearcell, invasive)	rs3848180	15	81596590	G	T	-0.007059	0.04064
Ovarian (clearcell, invasive)	rs4778893	15	81611253	A	G	0.03217	0.05539
Ovarian (clearcell, invasive)	rs6495562	15	81612117	T	C	-0.05709	0.08056
Ovarian (clearcell, invasive)	rs4611404	15	81613766	C	T	-0.04638	0.09253
Ovarian (clearcell, invasive)	rs75194383	15	81664543	G	T	-0.1535	0.09214
Ovarian (clearcell, invasive)	rs58484457	15	81769674	C	T	-0.01711	0.04501
Ovarian (clearcell, invasive)	rs116947254	15	81786092	A	G	0.01956	0.09547
Ovarian (clearcell, invasive)	rs1482937	15	81811499	G	C	-0.01819	0.05098
Ovarian (clearcell, invasive)	rs12913587	15	81836114	A	G	-0.01051	0.04206
Ovarian (clearcell, invasive)	rs7179124	15	81960730	G	C	-0.003647	0.04424
Ovarian (endometrioid, invasive)	rs1848707	15	81421792	G	A	0.002612	0.03061
Ovarian (endometrioid, invasive)	rs35000575	15	81439638	A	C	0.003027	0.0446
Ovarian (endometrioid, invasive)	rs35254208	15	81481945	A	T	-0.02466	0.04409
Ovarian (endometrioid, invasive)	rs75824993	15	81494541	A	C	0.003251	0.0526
Ovarian (endometrioid, invasive)	rs4128767	15	81543407	G	A	0.02739	0.03127
Ovarian (endometrioid, invasive)	rs7170924	15	81583139	T	G	-0.001282	0.03425
Ovarian (endometrioid, invasive)	rs4778890	15	81589648	G	C	-0.02922	0.05913
Ovarian (endometrioid, invasive)	rs3848180	15	81596590	G	T	-0.003002	0.02919
Ovarian (endometrioid, invasive)	rs4778893	15	81611253	A	G	0.02576	0.03977
Ovarian (endometrioid, invasive)	rs6495562	15	81612117	T	C	-0.03165	0.05852
Ovarian (endometrioid, invasive)	rs4611404	15	81613766	C	T	0.1942	0.07131
Ovarian (endometrioid, invasive)	rs75194383	15	81664543	G	T	-0.01774	0.06841
Ovarian (endometrioid, invasive)	rs58484457	15	81769674	C	T	-0.03917	0.03237
Ovarian (endometrioid, invasive)	rs116947254	15	81786092	A	G	-0.1329	0.07093
Ovarian (endometrioid, invasive)	rs1482937	15	81811499	G	C	-0.03924	0.03641
Ovarian (endometrioid, invasive)	rs12913587	15	81836114	A	G	-0.02122	0.03011
Ovarian (endometrioid, invasive)	rs7179124	15	81960730	G	C	0.004319	0.03171
Ovarian (borderline)	rs1848707	15	81421792	G	A	-0.03499	0.03034
Ovarian (borderline)	rs35000575	15	81439638	A	C	-0.01743	0.04384
Ovarian (borderline)	rs35254208	15	81481945	A	T	0.02169	0.04296
Ovarian (borderline)	rs75824993	15	81494541	A	C	-0.04208	0.0522
Ovarian (borderline)	rs4128767	15	81543407	G	A	0.04493	0.03064
Ovarian (borderline)	rs7170924	15	81583139	T	G	-0.03908	0.03414
Ovarian (borderline)	rs4778890	15	81589648	G	C	-0.07602	0.05777
Ovarian (borderline)	rs3848180	15	81596590	G	T	-0.002785	0.02858
Ovarian (borderline)	rs4778893	15	81611253	A	G	0.01639	0.03979
Ovarian (borderline)	rs6495562	15	81612117	T	C	0.02379	0.05885
Ovarian (borderline)	rs4611404	15	81613766	C	T	-0.04837	0.06494
Ovarian (borderline)	rs75194383	15	81664543	G	T	-0.09384	0.06611
Ovarian (borderline)	rs58484457	15	81769674	C	T	-0.03936	0.03185
Ovarian (borderline)	rs116947254	15	81786092	A	G	0.03512	0.06634
Ovarian (borderline)	rs1482937	15	81811499	G	C	0.01863	0.03628
Ovarian (borderline)	rs12913587	15	81836114	A	G	0.02995	0.02986
Ovarian (borderline)	rs7179124	15	81960730	G	C	0.0128	0.031
Ovarian (mucinous, invasive)	rs1848707	15	81421792	G	A	-0.0311	0.04224
Ovarian (mucinous, invasive)	rs35000575	15	81439638	A	C	-0.0166	0.06142
Ovarian (mucinous, invasive)	rs35254208	15	81481945	A	T	0.009847	0.06039
Ovarian (mucinous, invasive)	rs75824993	15	81494541	A	C	-0.06999	0.07286
Ovarian (mucinous, invasive)	rs4128767	15	81543407	G	A	0.02851	0.04306
Ovarian (mucinous, invasive)	rs7170924	15	81583139	T	G	-0.01854	0.04758
Ovarian (mucinous, invasive)	rs4778890	15	81589648	G	C	0.09442	0.08249
Ovarian (mucinous, invasive)	rs3848180	15	81596590	G	T	0.07774	0.04025
Ovarian (mucinous, invasive)	rs4778893	15	81611253	A	G	-0.09175	0.05614
Ovarian (mucinous, invasive)	rs6495562	15	81612117	T	C	-0.05062	0.07976
Ovarian (mucinous, invasive)	rs4611404	15	81613766	C	T	-0.0637	0.09279
Ovarian (mucinous, invasive)	rs75194383	15	81664543	G	T	-0.1438	0.09185
Ovarian (mucinous, invasive)	rs58484457	15	81769674	C	T	0.008169	0.04482
Ovarian (mucinous, invasive)	rs116947254	15	81786092	A	G	-0.0006315	0.09555
Ovarian (mucinous, invasive)	rs1482937	15	81811499	G	C	0.003313	0.05045
Ovarian (mucinous, invasive)	rs12913587	15	81836114	A	G	-0.05667	0.04156
Ovarian (mucinous, invasive)	rs7179124	15	81960730	G	C	0.0202	0.04362
Ovarian (mucinous, borderline & invasive)	rs1848707	15	81421792	G	A	-0.04017	0.03219
Ovarian (mucinous, borderline & invasive)	rs35000575	15	81439638	A	C	-0.05075	0.04694
Ovarian (mucinous, borderline & invasive)	rs35254208	15	81481945	A	T	0.04362	0.04553
Ovarian (mucinous, borderline & invasive)	rs75824993	15	81494541	A	C	-0.05903	0.05533
Ovarian (mucinous, borderline & invasive)	rs4128767	15	81543407	G	A	0.04128	0.03262
Ovarian (mucinous, borderline & invasive)	rs7170924	15	81583139	T	G	-0.01612	0.03599
Ovarian (mucinous, borderline & invasive)	rs4778890	15	81589648	G	C	0.02505	0.06226
Ovarian (mucinous, borderline & invasive)	rs3848180	15	81596590	G	T	0.05956	0.03044
Ovarian (mucinous, borderline & invasive)	rs4778893	15	81611253	A	G	-0.04912	0.04255
Ovarian (mucinous, borderline & invasive)	rs6495562	15	81612117	T	C	0.01096	0.06186
Ovarian (mucinous, borderline & invasive)	rs4611404	15	81613766	C	T	-0.0209	0.0708
Ovarian (mucinous, borderline & invasive)	rs75194383	15	81664543	G	T	-0.1028	0.07033
Ovarian (mucinous, borderline & invasive)	rs58484457	15	81769674	C	T	-0.00881	0.03399
Ovarian (mucinous, borderline & invasive)	rs116947254	15	81786092	A	G	0.02763	0.07154
Ovarian (mucinous, borderline & invasive)	rs1482937	15	81811499	G	C	-0.01469	0.03826
Ovarian (mucinous, borderline & invasive)	rs12913587	15	81836114	A	G	-0.009157	0.03171
Ovarian (mucinous, borderline & invasive)	rs7179124	15	81960730	G	C	0.02136	0.03302
Ovarian (mucinous, borderline)	rs1848707	15	81421792	G	A	-0.0629	0.04769
Ovarian (mucinous, borderline)	rs35000575	15	81439638	A	C	-0.1106	0.07002
Ovarian (mucinous, borderline)	rs35254208	15	81481945	A	T	0.09294	0.06649
Ovarian (mucinous, borderline)	rs75824993	15	81494541	A	C	-0.04795	0.08187
Ovarian (mucinous, borderline)	rs4128767	15	81543407	G	A	0.06195	0.04809
Ovarian (mucinous, borderline)	rs7170924	15	81583139	T	G	-0.01638	0.05293
Ovarian (mucinous, borderline)	rs4778890	15	81589648	G	C	-0.06103	0.09091
Ovarian (mucinous, borderline)	rs3848180	15	81596590	G	T	0.04382	0.04471
Ovarian (mucinous, borderline)	rs4778893	15	81611253	A	G	0.02108	0.06232
Ovarian (mucinous, borderline)	rs6495562	15	81612117	T	C	0.1181	0.09433
Ovarian (mucinous, borderline)	rs4611404	15	81613766	C	T	0.06392	0.1051
Ovarian (mucinous, borderline)	rs75194383	15	81664543	G	T	-0.0521	0.1045
Ovarian (mucinous, borderline)	rs58484457	15	81769674	C	T	-0.03047	0.04988
Ovarian (mucinous, borderline)	rs116947254	15	81786092	A	G	0.05757	0.1031
Ovarian (mucinous, borderline)	rs1482937	15	81811499	G	C	-0.0431	0.05623
Ovarian (mucinous, borderline)	rs12913587	15	81836114	A	G	0.04949	0.04699
Ovarian (mucinous, borderline)	rs7179124	15	81960730	G	C	0.01609	0.0485
Ovarian (serous, borderline & invasive LG)	rs1848707	15	81421792	G	A	-0.0004341	0.03053
Ovarian (serous, borderline & invasive LG)	rs35000575	15	81439638	A	C	0.009878	0.04415
Ovarian (serous, borderline & invasive LG)	rs35254208	15	81481945	A	T	0.002511	0.04362
Ovarian (serous, borderline & invasive LG)	rs75824993	15	81494541	A	C	-0.05148	0.05322
Ovarian (serous, borderline & invasive LG)	rs4128767	15	81543407	G	A	0.03301	0.03118
Ovarian (serous, borderline & invasive LG)	rs7170924	15	81583139	T	G	-0.01237	0.03465
Ovarian (serous, borderline & invasive LG)	rs4778890	15	81589648	G	C	-0.04991	0.05816
Ovarian (serous, borderline & invasive LG)	rs3848180	15	81596590	G	T	0.002838	0.02898
Ovarian (serous, borderline & invasive LG)	rs4778893	15	81611253	A	G	0.02667	0.04021
Ovarian (serous, borderline & invasive LG)	rs6495562	15	81612117	T	C	-0.03817	0.05904
Ovarian (serous, borderline & invasive LG)	rs4611404	15	81613766	C	T	-0.01441	0.06639
Ovarian (serous, borderline & invasive LG)	rs75194383	15	81664543	G	T	-0.1342	0.06671
Ovarian (serous, borderline & invasive LG)	rs58484457	15	81769674	C	T	-0.05083	0.03222
Ovarian (serous, borderline & invasive LG)	rs116947254	15	81786092	A	G	0.01187	0.06779
Ovarian (serous, borderline & invasive LG)	rs1482937	15	81811499	G	C	0.003368	0.03682
Ovarian (serous, borderline & invasive LG)	rs12913587	15	81836114	A	G	0.002844	0.0302
Ovarian (serous, borderline & invasive LG)	rs7179124	15	81960730	G	C	0.02557	0.03147
Ovarian Serous (invasive LG & HG)	rs1848707	15	81421792	G	A	-0.005938	0.01629
Ovarian Serous (invasive LG & HG)	rs35000575	15	81439638	A	C	0.002866	0.0237
Ovarian Serous (invasive LG & HG)	rs35254208	15	81481945	A	T	0.02526	0.0234
Ovarian Serous (invasive LG & HG)	rs75824993	15	81494541	A	C	-0.03203	0.02811
Ovarian Serous (invasive LG & HG)	rs4128767	15	81543407	G	A	0.01621	0.01658
Ovarian Serous (invasive LG & HG)	rs7170924	15	81583139	T	G	-0.008341	0.01828
Ovarian Serous (invasive LG & HG)	rs4778890	15	81589648	G	C	-0.008247	0.03168
Ovarian Serous (invasive LG & HG)	rs3848180	15	81596590	G	T	0.03312	0.01556
Ovarian Serous (invasive LG & HG)	rs4778893	15	81611253	A	G	0.001391	0.02149
Ovarian Serous (invasive LG & HG)	rs6495562	15	81612117	T	C	-0.007009	0.03141
Ovarian Serous (invasive LG & HG)	rs4611404	15	81613766	C	T	0.0611	0.03669
Ovarian Serous (invasive LG & HG)	rs75194383	15	81664543	G	T	-0.03415	0.03649
Ovarian Serous (invasive LG & HG)	rs58484457	15	81769674	C	T	-0.001488	0.01738
Ovarian Serous (invasive LG & HG)	rs116947254	15	81786092	A	G	-0.02644	0.0369
Ovarian Serous (invasive LG & HG)	rs1482937	15	81811499	G	C	-0.01782	0.01951
Ovarian Serous (invasive LG & HG)	rs12913587	15	81836114	A	G	-0.00785	0.01607
Ovarian Serous (invasive LG & HG)	rs7179124	15	81960730	G	C	-0.01161	0.01696
Ovarian (serous, invasive HG)	rs1848707	15	81421792	G	A	-0.01035	0.01679
Ovarian (serous, invasive HG)	rs35000575	15	81439638	A	C	0.005697	0.0244
Ovarian (serous, invasive HG)	rs35254208	15	81481945	A	T	0.02639	0.0241
Ovarian (serous, invasive HG)	rs75824993	15	81494541	A	C	-0.02651	0.02888
Ovarian (serous, invasive HG)	rs4128767	15	81543407	G	A	0.01526	0.01705
Ovarian (serous, invasive HG)	rs7170924	15	81583139	T	G	-0.0166	0.01882
Ovarian (serous, invasive HG)	rs4778890	15	81589648	G	C	-0.0148	0.03266
Ovarian (serous, invasive HG)	rs3848180	15	81596590	G	T	0.03044	0.01602
Ovarian (serous, invasive HG)	rs4778893	15	81611253	A	G	-0.001412	0.02212
Ovarian (serous, invasive HG)	rs6495562	15	81612117	T	C	-0.002201	0.03233
Ovarian (serous, invasive HG)	rs4611404	15	81613766	C	T	0.05041	0.03772
Ovarian (serous, invasive HG)	rs75194383	15	81664543	G	T	-0.0223	0.03761
Ovarian (serous, invasive HG)	rs58484457	15	81769674	C	T	0.004105	0.01789
Ovarian (serous, invasive HG)	rs116947254	15	81786092	A	G	-0.02624	0.03805
Ovarian (serous, invasive HG)	rs1482937	15	81811499	G	C	-0.01217	0.02008
Ovarian (serous, invasive HG)	rs12913587	15	81836114	A	G	-0.004551	0.01654
Ovarian (serous, invasive HG)	rs7179124	15	81960730	G	C	-0.01819	0.01746
Ovarian (serous, borderline)	rs1848707	15	81421792	G	A	-0.02309	0.03724
Ovarian (serous, borderline)	rs35000575	15	81439638	A	C	0.02821	0.05331
Ovarian (serous, borderline)	rs35254208	15	81481945	A	T	-0.01277	0.05306
Ovarian (serous, borderline)	rs75824993	15	81494541	A	C	-0.03859	0.06411
Ovarian (serous, borderline)	rs4128767	15	81543407	G	A	0.03268	0.03759
Ovarian (serous, borderline)	rs7170924	15	81583139	T	G	-0.05767	0.04222
Ovarian (serous, borderline)	rs4778890	15	81589648	G	C	-0.08922	0.07084
Ovarian (serous, borderline)	rs3848180	15	81596590	G	T	-0.02856	0.03513
Ovarian (serous, borderline)	rs4778893	15	81611253	A	G	0.0141	0.04888
Ovarian (serous, borderline)	rs6495562	15	81612117	T	C	-0.02504	0.07157
Ovarian (serous, borderline)	rs4611404	15	81613766	C	T	-0.1097	0.07828
Ovarian (serous, borderline)	rs75194383	15	81664543	G	T	-0.1181	0.08068
Ovarian (serous, borderline)	rs58484457	15	81769674	C	T	-0.04737	0.03908
Ovarian (serous, borderline)	rs116947254	15	81786092	A	G	0.01603	0.08178
Ovarian (serous, borderline)	rs1482937	15	81811499	G	C	0.04615	0.04482
Ovarian (serous, borderline)	rs12913587	15	81836114	A	G	0.01742	0.03661
Ovarian (serous, borderline)	rs7179124	15	81960730	G	C	0.008849	0.0381
Ovarian (serous, invasive LG)	rs1848707	15	81421792	G	A	0.04685	0.05026
Ovarian (serous, invasive LG)	rs35000575	15	81439638	A	C	-0.02068	0.07363
Ovarian (serous, invasive LG)	rs35254208	15	81481945	A	T	0.02943	0.07232
Ovarian (serous, invasive LG)	rs75824993	15	81494541	A	C	-0.08579	0.08941
Ovarian (serous, invasive LG)	rs4128767	15	81543407	G	A	0.02655	0.05246
Ovarian (serous, invasive LG)	rs7170924	15	81583139	T	G	0.08352	0.05705
Ovarian (serous, invasive LG)	rs4778890	15	81589648	G	C	0.01994	0.09576
Ovarian (serous, invasive LG)	rs3848180	15	81596590	G	T	0.05983	0.04804
Ovarian (serous, invasive LG)	rs4778893	15	81611253	A	G	0.05672	0.06655
Ovarian (serous, invasive LG)	rs6495562	15	81612117	T	C	-0.06647	0.09816
Ovarian (serous, invasive LG)	rs4611404	15	81613766	C	T	0.1746	0.1164
Ovarian (serous, invasive LG)	rs75194383	15	81664543	G	T	-0.1724	0.1113
Ovarian (serous, invasive LG)	rs58484457	15	81769674	C	T	-0.05141	0.0533
Ovarian (serous, invasive LG)	rs116947254	15	81786092	A	G	-0.007625	0.1145
Ovarian (serous, invasive LG)	rs1482937	15	81811499	G	C	-0.07743	0.06078
Ovarian (serous, invasive LG)	rs12913587	15	81836114	A	G	-0.039	0.05023
Ovarian (serous, invasive LG)	rs7179124	15	81960730	G	C	0.05835	0.05239
Prostate (overall)	rs1848707	15	81421792	A	G	0.0223	0.0089
Prostate (overall)	rs35000575	15	81439638	A	C	-0.0264	0.0126
Prostate (overall)	rs35254208	15	81481945	A	T	0.0139	0.0128
Prostate (overall)	rs75824993	15	81494541	A	C	0.0029	0.0148
Prostate (overall)	rs4128767	15	81543407	A	G	0.012	0.0087
Prostate (overall)	rs7170924	15	81583139	T	G	-0.0127	0.0096
Prostate (overall)	rs4778890	15	81589648	C	G	0.0003	0.0173
Prostate (overall)	rs3848180	15	81596590	T	G	0.0027	0.0083
Prostate (overall)	rs4778893	15	81611253	A	G	0.0057	0.0116
Prostate (overall)	rs6495562	15	81612117	T	C	0.0112	0.0172
Prostate (overall)	rs4611404	15	81613766	T	C	-0.0137	0.0201
Prostate (overall)	rs75194383	15	81664543	T	G	0.0033	0.0194
Prostate (overall)	rs58484457	15	81769674	T	C	0.0037	0.0094
Prostate (overall)	rs116947254	15	81786092	A	G	-0.0019	0.0196
Prostate (overall)	rs1482937	15	81811499	C	G	-0.0007	0.0103
Prostate (overall)	rs12913587	15	81836114	A	G	0.007	0.0087
Prostate (overall)	rs7179124	15	81960730	C	G	0.0042	0.0089
Prostate (advanced)	rs1848707	15	81421792	A	G	0.02	0.0152
Prostate (advanced)	rs35000575	15	81439638	A	C	-0.0176	0.0216
Prostate (advanced)	rs35254208	15	81481945	A	T	-0.0106	0.0221
Prostate (advanced)	rs75824993	15	81494541	A	C	0.004	0.0254
Prostate (advanced)	rs4128767	15	81543407	A	G	-0.012	0.0151
Prostate (advanced)	rs7170924	15	81583139	T	G	0.0061	0.0165
Prostate (advanced)	rs4778890	15	81589648	C	G	0.0053	0.0301
Prostate (advanced)	rs3848180	15	81596590	T	G	-0.0001	0.0142
Prostate (advanced)	rs4778893	15	81611253	A	G	0.0136	0.0198
Prostate (advanced)	rs6495562	15	81612117	T	C	-0.0221	0.0291
Prostate (advanced)	rs4611404	15	81613766	T	C	-0.0249	0.0346
Prostate (advanced)	rs75194383	15	81664543	T	G	-0.0351	0.0334
Prostate (advanced)	rs58484457	15	81769674	T	C	-0.0014	0.0162
Prostate (advanced)	rs116947254	15	81786092	A	G	-0.049	0.0339
Prostate (advanced)	rs1482937	15	81811499	C	G	-0.0008	0.0177
Prostate (advanced)	rs12913587	15	81836114	A	G	0.0105	0.0149
Prostate (advanced)	rs7179124	15	81960730	C	G	0.0088	0.0152
Prostate (high vs low risk)	rs1848707	15	81421792	A	G	0.0286	0.0222
Prostate (high vs low risk)	rs35000575	15	81439638	A	C	-0.0348	0.0317
Prostate (high vs low risk)	rs35254208	15	81481945	A	T	0.0181	0.0316
Prostate (high vs low risk)	rs75824993	15	81494541	A	C	0.064	0.037
Prostate (high vs low risk)	rs4128767	15	81543407	A	G	0.0042	0.022
Prostate (high vs low risk)	rs7170924	15	81583139	T	G	0.0583	0.0243
Prostate (high vs low risk)	rs4778890	15	81589648	C	G	-0.0084	0.0438
Prostate (high vs low risk)	rs3848180	15	81596590	T	G	0.0205	0.0211
Prostate (high vs low risk)	rs4778893	15	81611253	A	G	-0.0039	0.0288
Prostate (high vs low risk)	rs6495562	15	81612117	T	C	-0.0303	0.0421
Prostate (high vs low risk)	rs4611404	15	81613766	T	C	0.0411	0.0505
Prostate (high vs low risk)	rs75194383	15	81664543	T	G	-0.0214	0.0484
Prostate (high vs low risk)	rs58484457	15	81769674	T	C	0.0144	0.0234
Prostate (high vs low risk)	rs116947254	15	81786092	A	G	-0.0024	0.0491
Prostate (high vs low risk)	rs1482937	15	81811499	C	G	0.0244	0.0258
Prostate (high vs low risk)	rs12913587	15	81836114	A	G	0.0065	0.0217
Prostate (high vs low risk)	rs7179124	15	81960730	C	G	0.0204	0.0223
Prostate (high vs low+int risk)	rs1848707	15	81421792	A	G	0.0104	0.0144
Prostate (high vs low+int risk)	rs35000575	15	81439638	A	C	-0.0058	0.0206
Prostate (high vs low+int risk)	rs35254208	15	81481945	A	T	-0.0023	0.0205
Prostate (high vs low+int risk)	rs75824993	15	81494541	A	C	0.0316	0.0239
Prostate (high vs low+int risk)	rs4128767	15	81543407	A	G	-0.011	0.0141
Prostate (high vs low+int risk)	rs7170924	15	81583139	T	G	0.0288	0.0155
Prostate (high vs low+int risk)	rs4778890	15	81589648	C	G	-0.0029	0.0281
Prostate (high vs low+int risk)	rs3848180	15	81596590	T	G	0.0107	0.0134
Prostate (high vs low+int risk)	rs4778893	15	81611253	A	G	0	0.0186
Prostate (high vs low+int risk)	rs6495562	15	81612117	T	C	-0.027	0.0276
Prostate (high vs low+int risk)	rs4611404	15	81613766	T	C	0.0129	0.0323
Prostate (high vs low+int risk)	rs75194383	15	81664543	T	G	-0.0345	0.031
Prostate (high vs low+int risk)	rs58484457	15	81769674	T	C	0.004	0.0151
Prostate (high vs low+int risk)	rs116947254	15	81786092	A	G	-0.0313	0.0315
Prostate (high vs low+int risk)	rs1482937	15	81811499	C	G	0.0151	0.0168
Prostate (high vs low+int risk)	rs12913587	15	81836114	A	G	-0.0087	0.014
Prostate (high vs low+int risk)	rs7179124	15	81960730	C	G	0.0138	0.0143
Breast (overall)	rs71478720	11	112009605	T	C	-0.00772491	0.00696648
Breast (overall)	rs1534115	11	112210999	G	A	-0.00676562	0.00656816
Breast (overall)	rs55772679	11	112235908	T	C	0.00301285	0.00630127
Breast (overall)	rs76785871	11	112387246	A	G	0.00821804	0.0107301
Breast (overall)	rs10789893	11	112391048	T	C	-0.0092115	0.00649113
Breast (HER2 enriched)	rs10789893	11	112391048	T	C	-0.00720351	0.0274464
Breast (HER2 enriched)	rs1534115	11	112210999	G	A	0.0430241	0.0281444
Breast (HER2 enriched)	rs55772679	11	112235908	T	C	-0.00395447	0.0268347
Breast (HER2 enriched)	rs71478720	11	112009605	T	C	-0.0154622	0.029847
Breast (HER2 enriched)	rs76785871	11	112387246	A	G	0.0329001	0.0451874
Breast (luminal A)	rs10789893	11	112391048	T	C	-0.00363565	0.0085198
Breast (luminal A)	rs1534115	11	112210999	G	A	-0.000448885	0.00864326
Breast (luminal A)	rs55772679	11	112235908	T	C	0.00583675	0.00830719
Breast (luminal A)	rs71478720	11	112009605	T	C	-0.00371649	0.00916341
Breast (luminal A)	rs76785871	11	112387246	A	G	0.0183553	0.014122
Breast (luminal B)	rs10789893	11	112391048	T	C	-0.0222947	0.0189526
Breast (luminal B)	rs1534115	11	112210999	G	A	-0.00128594	0.0191434
Breast (luminal B)	rs55772679	11	112235908	T	C	-0.0033505	0.0185479
Breast (luminal B)	rs71478720	11	112009605	T	C	-0.0200711	0.0205805
Breast (luminal B)	rs76785871	11	112387246	A	G	0.00815073	0.0315409
Breast (luminal B, HER2 neg.)	rs10789893	11	112391048	T	C	-0.0124727	0.0161409
Breast (luminal B, HER2 neg.)	rs1534115	11	112210999	G	A	-0.0282014	0.0162985
Breast (luminal B, HER2 neg.)	rs55772679	11	112235908	T	C	0.0253635	0.0157686
Breast (luminal B, HER2 neg.)	rs71478720	11	112009605	T	C	-0.00721547	0.0174768
Breast (luminal B, HER2 neg.)	rs76785871	11	112387246	A	G	-0.0228488	0.0272387
Breast (triple negative)	rs10789893	11	112391048	T	C	-0.0182658	0.0163523
Breast (triple negative)	rs1534115	11	112210999	G	A	-0.0278676	0.016527
Breast (triple negative)	rs55772679	11	112235908	T	C	0.00715258	0.015954
Breast (triple negative)	rs71478720	11	112009605	T	C	-0.00968763	0.0176971
Breast (triple negative)	rs76785871	11	112387246	A	G	0.00171756	0.027266
Ovarian (overall, MA incl. CIMBA)	rs71478720	11	112009605	T	C	-0.0041	0.0136
Ovarian (overall, MA incl. CIMBA)	rs1534115	11	112210999	A	G	-0.0074	0.0127
Ovarian (overall, MA incl. CIMBA)	rs55772679	11	112235908	T	C	0.0061	0.0123
Ovarian (overall, MA incl. CIMBA)	rs76785871	11	112387246	A	G	0.0267	0.0208
Ovarian (overall, MA incl. CIMBA)	rs10789893	11	112391048	T	C	0.0026	0.0126
Ovarian (serous, MA incl. CIMBA)	rs71478720	11	112009605	T	C	0.0048	0.0152
Ovarian (serous, MA incl. CIMBA)	rs1534115	11	112210999	A	G	-0.0021	0.0141
Ovarian (serous, MA incl. CIMBA)	rs55772679	11	112235908	T	C	0.0121	0.0137
Ovarian (serous, MA incl. CIMBA)	rs76785871	11	112387246	A	G	0.0348	0.0233
Ovarian (serous, MA incl. CIMBA)	rs10789893	11	112391048	T	C	0.0055	0.0141
Endometrial (overall)	rs71478720	11	112009605	T	C	-0.00679011	0.0175338
Endometrial (overall)	rs1534115	11	112210999	G	A	-0.0170906	0.0164584
Endometrial (overall)	rs55772679	11	112235908	T	C	0.00504145	0.0157789
Endometrial (overall)	rs76785871	11	112387246	A	G	0.0134346	0.0264897
Endometrial (overall)	rs10789893	11	112391048	T	C	-0.0157631	0.0165973
Endometrial (endometrioid)	rs71478720	11	112009605	T	C	0.00581956	0.0213937
Endometrial (endometrioid)	rs1534115	11	112210999	G	A	-0.0228364	0.020091
Endometrial (endometrioid)	rs55772679	11	112235908	T	C	0.0133787	0.0192795
Endometrial (endometrioid)	rs76785871	11	112387246	A	G	0.0294491	0.0324183
Endometrial (endometrioid)	rs10789893	11	112391048	T	C	-0.0218954	0.0202173
Endometrial (non-endometrioid)	rs71478720	11	112009605	T	C	0.0413868	0.0525618
Endometrial (non-endometrioid)	rs1534115	11	112210999	G	A	0.0354613	0.0506359
Endometrial (non-endometrioid)	rs55772679	11	112235908	T	C	0.0545149	0.0483384
Endometrial (non-endometrioid)	rs76785871	11	112387246	A	G	0.0247419	0.0817649
Endometrial (non-endometrioid)	rs10789893	11	112391048	T	C	-0.0235361	0.0507206
Lung (adenocarcinoma)	rs71478720	11	112009605	T	C	0.0615531	0.018865
Lung (adenocarcinoma)	rs1534115	11	112210999	G	A	0.0233403	0.017293
Lung (adenocarcinoma)	rs55772679	11	112235908	T	C	0.031612	0.017063
Lung (adenocarcinoma)	rs76785871	11	112387246	A	G	0.060699	0.029996
Lung (adenocarcinoma)	rs10789893	11	112391048	T	C	-0.0129535	0.017354
Lung (ever smokers)	rs71478720	11	112009605	T	C	0.0367957	0.017363
Lung (ever smokers)	rs1534115	11	112210999	G	A	0.0169305	0.015934
Lung (ever smokers)	rs55772679	11	112235908	T	C	0.022011	0.015801
Lung (ever smokers)	rs76785871	11	112387246	A	G	0.0485206	0.027132
Lung (ever smokers)	rs10789893	11	112391048	T	C	-0.00640748	0.015954
Lung (never smokers)	rs71478720	11	112009605	T	C	0.0819873	0.041096
Lung (never smokers)	rs1534115	11	112210999	G	A	0.0441525	0.037594
Lung (never smokers)	rs55772679	11	112235908	T	C	0.0336379	0.036993
Lung (never smokers)	rs76785871	11	112387246	A	G	0.0629016	0.065798
Lung (never smokers)	rs10789893	11	112391048	T	C	-0.0460754	0.037809
Lung (overall)	rs71478720	11	112009605	T	C	0.0322368	0.013619
Lung (overall)	rs1534115	11	112210999	G	A	0.0219767	0.012573
Lung (overall)	rs55772679	11	112235908	T	C	0.0178989	0.012387
Lung (overall)	rs76785871	11	112387246	A	G	0.0345898	0.021414
Lung (overall)	rs10789893	11	112391048	T	C	-0.019503	0.012588
Lung (small cell)	rs71478720	11	112009605	T	C	-0.0108314	0.034537
Lung (small cell)	rs1534115	11	112210999	G	A	-0.0111852	0.031648
Lung (small cell)	rs55772679	11	112235908	T	C	-0.0381869	0.03153
Lung (small cell)	rs76785871	11	112387246	A	G	-0.000964465	0.05476
Lung (small cell)	rs10789893	11	112391048	T	C	-0.0508471	0.032217
Lung (squamous cell)	rs71478720	11	112009605	T	C	0.0133722	0.021814
Lung (squamous cell)	rs1534115	11	112210999	G	A	0.0135544	0.020161
Lung (squamous cell)	rs55772679	11	112235908	T	C	0.0143584	0.019917
Lung (squamous cell)	rs76785871	11	112387246	A	G	0.0057733	0.034495
Lung (squamous cell)	rs10789893	11	112391048	T	C	-0.0106293	0.020202
Ovarian (overall, invasive)	rs71478720	11	112009605	T	C	-0.008814	0.01531
Ovarian (overall, invasive)	rs1534115	11	112210999	G	A	-0.008219	0.01434
Ovarian (overall, invasive)	rs55772679	11	112235908	T	C	-0.001752	0.01388
Ovarian (overall, invasive)	rs76785871	11	112387246	A	G	0.0268	0.02321
Ovarian (overall, invasive)	rs10789893	11	112391048	T	C	0.004251	0.01426
Ovarian (clearcell, invasive)	rs71478720	11	112009605	T	C	0.02122	0.04608
Ovarian (clearcell, invasive)	rs1534115	11	112210999	G	A	0.003562	0.04334
Ovarian (clearcell, invasive)	rs55772679	11	112235908	T	C	-0.02047	0.04219
Ovarian (clearcell, invasive)	rs76785871	11	112387246	A	G	-0.04218	0.07047
Ovarian (clearcell, invasive)	rs10789893	11	112391048	T	C	-0.03312	0.04375
Ovarian (endometrioid, invasive)	rs71478720	11	112009605	T	C	-0.05125	0.03341
Ovarian (endometrioid, invasive)	rs1534115	11	112210999	G	A	-0.042	0.03085
Ovarian (endometrioid, invasive)	rs55772679	11	112235908	T	C	-0.01274	0.03008
Ovarian (endometrioid, invasive)	rs76785871	11	112387246	A	G	-0.03764	0.05046
Ovarian (endometrioid, invasive)	rs10789893	11	112391048	T	C	0.01344	0.03096
Ovarian (borderline)	rs71478720	11	112009605	T	C	-0.001262	0.03255
Ovarian (borderline)	rs1534115	11	112210999	G	A	0.0009254	0.03061
Ovarian (borderline)	rs55772679	11	112235908	T	C	0.006262	0.02981
Ovarian (borderline)	rs76785871	11	112387246	A	G	0.009404	0.04977
Ovarian (borderline)	rs10789893	11	112391048	T	C	-0.002125	0.03047
Ovarian (mucinous, invasive)	rs71478720	11	112009605	T	C	-0.04095	0.04575
Ovarian (mucinous, invasive)	rs1534115	11	112210999	G	A	0.04171	0.04296
Ovarian (mucinous, invasive)	rs55772679	11	112235908	T	C	-0.01897	0.04157
Ovarian (mucinous, invasive)	rs76785871	11	112387246	A	G	0.1073	0.06653
Ovarian (mucinous, invasive)	rs10789893	11	112391048	T	C	-0.04308	0.04317
Ovarian (mucinous, borderline & invasive)	rs71478720	11	112009605	T	C	-0.03439	0.03459
Ovarian (mucinous, borderline & invasive)	rs1534115	11	112210999	G	A	0.03927	0.03269
Ovarian (mucinous, borderline & invasive)	rs55772679	11	112235908	T	C	-0.01209	0.03152
Ovarian (mucinous, borderline & invasive)	rs76785871	11	112387246	A	G	0.06358	0.05149
Ovarian (mucinous, borderline & invasive)	rs10789893	11	112391048	T	C	-0.03979	0.03262
Ovarian (mucinous, borderline)	rs71478720	11	112009605	T	C	-0.02442	0.05073
Ovarian (mucinous, borderline)	rs1534115	11	112210999	G	A	0.05448	0.0483
Ovarian (mucinous, borderline)	rs55772679	11	112235908	T	C	-0.003249	0.04648
Ovarian (mucinous, borderline)	rs76785871	11	112387246	A	G	0.01599	0.07721
Ovarian (mucinous, borderline)	rs10789893	11	112391048	T	C	-0.03618	0.04788
Ovarian (serous, borderline & invasive LG)	rs71478720	11	112009605	T	C	0.02162	0.03301
Ovarian (serous, borderline & invasive LG)	rs1534115	11	112210999	G	A	-0.01606	0.03091
Ovarian (serous, borderline & invasive LG)	rs55772679	11	112235908	T	C	-0.009546	0.0303
Ovarian (serous, borderline & invasive LG)	rs76785871	11	112387246	A	G	0.03343	0.05005
Ovarian (serous, borderline & invasive LG)	rs10789893	11	112391048	T	C	0.009527	0.03108
Ovarian Serous (invasive LG & HG)	rs71478720	11	112009605	T	C	0.001763	0.01769
Ovarian Serous (invasive LG & HG)	rs1534115	11	112210999	G	A	-0.001111	0.01656
Ovarian Serous (invasive LG & HG)	rs55772679	11	112235908	T	C	0.003938	0.01604
Ovarian Serous (invasive LG & HG)	rs76785871	11	112387246	A	G	0.03754	0.02685
Ovarian Serous (invasive LG & HG)	rs10789893	11	112391048	T	C	0.008807	0.01648
Ovarian (serous, invasive HG)	rs71478720	11	112009605	T	C	-0.0009783	0.01821
Ovarian (serous, invasive HG)	rs1534115	11	112210999	G	A	-0.001872	0.01706
Ovarian (serous, invasive HG)	rs55772679	11	112235908	T	C	0.008038	0.01651
Ovarian (serous, invasive HG)	rs76785871	11	112387246	A	G	0.0343	0.02766
Ovarian (serous, invasive HG)	rs10789893	11	112391048	T	C	0.008469	0.01694
Ovarian (serous, borderline)	rs71478720	11	112009605	T	C	0.0108	0.04007
Ovarian (serous, borderline)	rs1534115	11	112210999	G	A	-0.03064	0.03742
Ovarian (serous, borderline)	rs55772679	11	112235908	T	C	0.01159	0.03673
Ovarian (serous, borderline)	rs76785871	11	112387246	A	G	0.01125	0.06121
Ovarian (serous, borderline)	rs10789893	11	112391048	T	C	0.01289	0.03741
Ovarian (serous, invasive LG)	rs71478720	11	112009605	T	C	0.02962	0.05467
Ovarian (serous, invasive LG)	rs1534115	11	112210999	G	A	0.004992	0.05155
Ovarian (serous, invasive LG)	rs55772679	11	112235908	T	C	-0.04453	0.05048
Ovarian (serous, invasive LG)	rs76785871	11	112387246	A	G	0.07087	0.08159
Ovarian (serous, invasive LG)	rs10789893	11	112391048	T	C	-0.002314	0.05259
Prostate (overall)	rs71478720	11	112009605	T	C	-0.0036	0.0094
Prostate (overall)	rs1534115	11	112210999	A	G	0.0027	0.0087
Prostate (overall)	rs55772679	11	112235908	T	C	0.0024	0.0084
Prostate (overall)	rs76785871	11	112387246	A	G	0.0077	0.0142
Prostate (overall)	rs10789893	11	112391048	T	C	-0.0116	0.0087
Prostate (advanced)	rs71478720	11	112009605	T	C	-0.0321	0.0162
Prostate (advanced)	rs1534115	11	112210999	A	G	-0.0179	0.015
Prostate (advanced)	rs55772679	11	112235908	T	C	0.0062	0.0145
Prostate (advanced)	rs76785871	11	112387246	A	G	-0.0096	0.0243
Prostate (advanced)	rs10789893	11	112391048	T	C	-0.0145	0.015
Prostate (high vs low risk)	rs71478720	11	112009605	T	C	-0.0248	0.0236
Prostate (high vs low risk)	rs1534115	11	112210999	A	G	-0.019	0.0218
Prostate (high vs low risk)	rs55772679	11	112235908	T	C	0.0103	0.021
Prostate (high vs low risk)	rs76785871	11	112387246	A	G	0.0173	0.0353
Prostate (high vs low risk)	rs10789893	11	112391048	T	C	-0.0069	0.0218
Prostate (high vs low+int risk)	rs71478720	11	112009605	T	C	-0.0275	0.0151
Prostate (high vs low+int risk)	rs1534115	11	112210999	A	G	-0.0128	0.014
Prostate (high vs low+int risk)	rs55772679	11	112235908	T	C	0.0071	0.0135
Prostate (high vs low+int risk)	rs76785871	11	112387246	A	G	0.0004	0.0228
Prostate (high vs low+int risk)	rs10789893	11	112391048	T	C	-0.0013	0.014
Breast (overall)	rs9308676	2	113428167	A	G	0.0129824	0.00609649
Breast (overall)	rs7594852	2	113521754	T	C	-0.0107856	0.00601954
Breast (overall)	rs3783548	2	113533333	A	G	0.00295038	0.0109245
Breast (overall)	rs62157451	2	113608418	C	G	0.0106281	0.0127315
Breast (overall)	rs4591347	2	113658705	T	C	0.000322907	0.00864101
Breast (overall)	rs7584409	2	113742734	A	G	-2.34143e-05	0.00660577
Breast (overall)	rs114189538	2	113821082	A	G	-0.00352769	0.0125199
Breast (overall)	rs6743376	2	113832333	A	C	-0.00709674	0.00629549
Breast (overall)	rs6734238	2	113841030	G	A	0.00438066	0.00618867
Breast (overall)	rs6723639	2	113872238	T	C	-0.00329212	0.0078023
Breast (overall)	rs74667587	2	113895079	A	G	-0.00465296	0.00799941
Breast (overall)	rs72829856	2	113913287	A	G	0.000696813	0.0109244
Breast (overall)	rs45592842	2	113943063	G	T	0.000500924	0.0122938
Breast (overall)	rs72831808	2	113979355	C	G	-0.00256407	0.0143755
Breast (overall)	rs1491585	2	114003621	G	A	0.00468966	0.00614006
Breast (overall)	rs1191686	2	114094703	C	T	-0.00830994	0.00770514
Breast (overall)	rs1867868	2	114162983	C	T	-0.000770117	0.00613623
Breast (overall)	rs3977064	2	114191728	C	A	-0.00711315	0.0127747
Breast (HER2 enriched)	rs74667587	2	113895079	A	G	-0.0181146	0.0342894
Breast (HER2 enriched)	rs114189538	2	113821082	A	G	0.0179497	0.0524342
Breast (HER2 enriched)	rs1191686	2	114094703	C	T	-0.0319689	0.0330966
Breast (HER2 enriched)	rs1491585	2	114003621	G	A	0.0166083	0.0259732
Breast (HER2 enriched)	rs1867868	2	114162983	C	T	0.0545914	0.0259396
Breast (HER2 enriched)	rs3783548	2	113533333	A	G	0.0116462	0.0472341
Breast (HER2 enriched)	rs3977064	2	114191728	C	A	-0.0219477	0.0535169
Breast (HER2 enriched)	rs45592842	2	113943063	G	T	0.0507906	0.0542033
Breast (HER2 enriched)	rs4591347	2	113658705	T	C	-0.0337374	0.0365441
Breast (HER2 enriched)	rs62157451	2	113608418	C	G	-0.0396424	0.0543941
Breast (HER2 enriched)	rs6723639	2	113872238	T	C	0.00246768	0.0330633
Breast (HER2 enriched)	rs6734238	2	113841030	G	A	0.0248219	0.0261941
Breast (HER2 enriched)	rs6743376	2	113832333	A	C	-0.00640906	0.0267935
Breast (HER2 enriched)	rs72829856	2	113913287	A	G	-0.00827222	0.0470468
Breast (HER2 enriched)	rs72831808	2	113979355	C	G	-0.0249078	0.0621023
Breast (HER2 enriched)	rs7584409	2	113742734	A	G	0.0240803	0.0283143
Breast (HER2 enriched)	rs7594852	2	113521754	T	C	-0.0245342	0.0257014
Breast (HER2 enriched)	rs9308676	2	113428167	A	G	0.0548066	0.0258775
Breast (luminal A)	rs74667587	2	113895079	A	G	-0.00693996	0.0105311
Breast (luminal A)	rs114189538	2	113821082	A	G	-0.0212129	0.0165421
Breast (luminal A)	rs1191686	2	114094703	C	T	-0.00779105	0.0101231
Breast (luminal A)	rs1491585	2	114003621	G	A	-0.0013551	0.00808567
Breast (luminal A)	rs1867868	2	114162983	C	T	0.00744486	0.00809124
Breast (luminal A)	rs3783548	2	113533333	A	G	-0.006734	0.0143389
Breast (luminal A)	rs3977064	2	114191728	C	A	-0.00754882	0.0166069
Breast (luminal A)	rs45592842	2	113943063	G	T	-0.0060416	0.0161077
Breast (luminal A)	rs4591347	2	113658705	T	C	0.00147748	0.011351
Breast (luminal A)	rs62157451	2	113608418	C	G	0.0106384	0.0166333
Breast (luminal A)	rs6723639	2	113872238	T	C	-0.00585683	0.0102755
Breast (luminal A)	rs6734238	2	113841030	G	A	0.00991405	0.00815283
Breast (luminal A)	rs6743376	2	113832333	A	C	-0.013434	0.00828238
Breast (luminal A)	rs72829856	2	113913287	A	G	0.00780843	0.014391
Breast (luminal A)	rs72831808	2	113979355	C	G	-0.00121099	0.0189675
Breast (luminal A)	rs7584409	2	113742734	A	G	-0.0101254	0.00868347
Breast (luminal A)	rs7594852	2	113521754	T	C	-0.00982947	0.00793062
Breast (luminal A)	rs9308676	2	113428167	A	G	0.00677368	0.0080282
Breast (luminal B)	rs74667587	2	113895079	A	G	0.000471654	0.0235799
Breast (luminal B)	rs114189538	2	113821082	A	G	0.0689066	0.0354591
Breast (luminal B)	rs1191686	2	114094703	C	T	-0.00400395	0.0224852
Breast (luminal B)	rs1491585	2	114003621	G	A	0.00224304	0.01788
Breast (luminal B)	rs1867868	2	114162983	C	T	-0.0174699	0.017877
Breast (luminal B)	rs3783548	2	113533333	A	G	0.0131152	0.0326726
Breast (luminal B)	rs3977064	2	114191728	C	A	0.00344271	0.0369257
Breast (luminal B)	rs45592842	2	113943063	G	T	0.00223836	0.0361846
Breast (luminal B)	rs4591347	2	113658705	T	C	0.0309337	0.0247592
Breast (luminal B)	rs62157451	2	113608418	C	G	-0.0391737	0.0373597
Breast (luminal B)	rs6723639	2	113872238	T	C	0.0196028	0.0227287
Breast (luminal B)	rs6734238	2	113841030	G	A	-0.0305973	0.0180001
Breast (luminal B)	rs6743376	2	113832333	A	C	0.0259802	0.0185622
Breast (luminal B)	rs72829856	2	113913287	A	G	-0.0433463	0.032854
Breast (luminal B)	rs72831808	2	113979355	C	G	0.0505343	0.0415458
Breast (luminal B)	rs7584409	2	113742734	A	G	0.0312262	0.0194591
Breast (luminal B)	rs7594852	2	113521754	T	C	-0.0203997	0.0176694
Breast (luminal B)	rs9308676	2	113428167	A	G	0.0212016	0.0178407
Breast (luminal B, HER2 neg.)	rs74667587	2	113895079	A	G	-0.000328103	0.0200373
Breast (luminal B, HER2 neg.)	rs114189538	2	113821082	A	G	-0.0522951	0.0318697
Breast (luminal B, HER2 neg.)	rs1191686	2	114094703	C	T	-0.0337703	0.0193745
Breast (luminal B, HER2 neg.)	rs1491585	2	114003621	G	A	0.0250032	0.0153064
Breast (luminal B, HER2 neg.)	rs1867868	2	114162983	C	T	-0.0172107	0.0153129
Breast (luminal B, HER2 neg.)	rs3783548	2	113533333	A	G	-0.0253179	0.027274
Breast (luminal B, HER2 neg.)	rs3977064	2	114191728	C	A	-0.00646811	0.0316377
Breast (luminal B, HER2 neg.)	rs45592842	2	113943063	G	T	0.00589329	0.0308784
Breast (luminal B, HER2 neg.)	rs4591347	2	113658705	T	C	-0.0185965	0.0215902
Breast (luminal B, HER2 neg.)	rs62157451	2	113608418	C	G	0.0211292	0.0312387
Breast (luminal B, HER2 neg.)	rs6723639	2	113872238	T	C	0.0423787	0.019215
Breast (luminal B, HER2 neg.)	rs6734238	2	113841030	G	A	0.0017841	0.0154116
Breast (luminal B, HER2 neg.)	rs6743376	2	113832333	A	C	-0.0262238	0.0156875
Breast (luminal B, HER2 neg.)	rs72829856	2	113913287	A	G	0.0464269	0.0269953
Breast (luminal B, HER2 neg.)	rs72831808	2	113979355	C	G	-0.0114006	0.0363819
Breast (luminal B, HER2 neg.)	rs7584409	2	113742734	A	G	0.00895375	0.0165419
Breast (luminal B, HER2 neg.)	rs7594852	2	113521754	T	C	-0.0182809	0.0150841
Breast (luminal B, HER2 neg.)	rs9308676	2	113428167	A	G	-0.00396335	0.0152516
Breast (triple negative)	rs74667587	2	113895079	A	G	-0.00696163	0.0202771
Breast (triple negative)	rs114189538	2	113821082	A	G	0.0651809	0.0306763
Breast (triple negative)	rs1191686	2	114094703	C	T	-0.0412714	0.0197198
Breast (triple negative)	rs1491585	2	114003621	G	A	-0.0068788	0.0154922
Breast (triple negative)	rs1867868	2	114162983	C	T	-0.00698134	0.0155196
Breast (triple negative)	rs3783548	2	113533333	A	G	0.0430939	0.0283679
Breast (triple negative)	rs3977064	2	114191728	C	A	-0.00245695	0.0320348
Breast (triple negative)	rs45592842	2	113943063	G	T	0.0244361	0.0315447
Breast (triple negative)	rs4591347	2	113658705	T	C	0.0086188	0.0216348
Breast (triple negative)	rs62157451	2	113608418	C	G	0.00592269	0.0318086
Breast (triple negative)	rs6723639	2	113872238	T	C	-0.0150206	0.0198154
Breast (triple negative)	rs6734238	2	113841030	G	A	-0.00862847	0.0155947
Breast (triple negative)	rs6743376	2	113832333	A	C	-0.0136979	0.0159005
Breast (triple negative)	rs72829856	2	113913287	A	G	0.0117549	0.0276811
Breast (triple negative)	rs72831808	2	113979355	C	G	0.0161905	0.0362428
Breast (triple negative)	rs7584409	2	113742734	A	G	-0.0156691	0.0166585
Breast (triple negative)	rs7594852	2	113521754	T	C	0.0392475	0.0152567
Breast (triple negative)	rs9308676	2	113428167	A	G	0.0320295	0.0154055
Ovarian (overall, MA incl. CIMBA)	rs9308676	2	113428167	A	G	0.0069	0.0119
Ovarian (overall, MA incl. CIMBA)	rs7594852	2	113521754	T	C	0.0155	0.0118
Ovarian (overall, MA incl. CIMBA)	rs3783548	2	113533333	A	G	-0.0471	0.0217
Ovarian (overall, MA incl. CIMBA)	rs62157451	2	113608418	C	G	-0.0316	0.0244
Ovarian (overall, MA incl. CIMBA)	rs4591347	2	113658705	T	C	-0.0395	0.0167
Ovarian (overall, MA incl. CIMBA)	rs7584409	2	113742734	A	G	-0.0082	0.0128
Ovarian (overall, MA incl. CIMBA)	rs114189538	2	113821082	A	G	0.039	0.0243
Ovarian (overall, MA incl. CIMBA)	rs6743376	2	113832333	A	C	-0.0223	0.0122
Ovarian (overall, MA incl. CIMBA)	rs6734238	2	113841030	A	G	0.0188	0.012
Ovarian (overall, MA incl. CIMBA)	rs6723639	2	113872238	T	C	0.0133	0.0153
Ovarian (overall, MA incl. CIMBA)	rs74667587	2	113895079	A	G	0.0232	0.0159
Ovarian (overall, MA incl. CIMBA)	rs72829856	2	113913287	A	G	-0.0106	0.0214
Ovarian (overall, MA incl. CIMBA)	rs45592842	2	113943063	T	G	-0.0118	0.0238
Ovarian (overall, MA incl. CIMBA)	rs72831808	2	113979355	C	G	-0.031	0.0282
Ovarian (overall, MA incl. CIMBA)	rs1491585	2	114003621	A	G	0.021	0.0119
Ovarian (overall, MA incl. CIMBA)	rs1191686	2	114094703	T	C	0.0148	0.0151
Ovarian (overall, MA incl. CIMBA)	rs1867868	2	114162983	T	C	-0.0118	0.0118
Ovarian (overall, MA incl. CIMBA)	rs3977064	2	114191728	A	C	0.0067	0.0248
Ovarian (serous, MA incl. CIMBA)	rs9308676	2	113428167	A	G	0.0087	0.0132
Ovarian (serous, MA incl. CIMBA)	rs7594852	2	113521754	T	C	0.0205	0.0131
Ovarian (serous, MA incl. CIMBA)	rs3783548	2	113533333	A	G	-0.0234	0.0243
Ovarian (serous, MA incl. CIMBA)	rs62157451	2	113608418	C	G	-0.0299	0.0272
Ovarian (serous, MA incl. CIMBA)	rs4591347	2	113658705	T	C	-0.0334	0.0185
Ovarian (serous, MA incl. CIMBA)	rs7584409	2	113742734	A	G	-0.0013	0.0143
Ovarian (serous, MA incl. CIMBA)	rs114189538	2	113821082	A	G	0.0386	0.027
Ovarian (serous, MA incl. CIMBA)	rs6743376	2	113832333	A	C	-0.0283	0.0137
Ovarian (serous, MA incl. CIMBA)	rs6734238	2	113841030	A	G	0.021	0.0134
Ovarian (serous, MA incl. CIMBA)	rs6723639	2	113872238	T	C	0.0239	0.017
Ovarian (serous, MA incl. CIMBA)	rs74667587	2	113895079	A	G	0.0132	0.0177
Ovarian (serous, MA incl. CIMBA)	rs72829856	2	113913287	A	G	-0.0174	0.024
Ovarian (serous, MA incl. CIMBA)	rs45592842	2	113943063	T	G	0.0017	0.0266
Ovarian (serous, MA incl. CIMBA)	rs72831808	2	113979355	C	G	-0.0338	0.0315
Ovarian (serous, MA incl. CIMBA)	rs1491585	2	114003621	A	G	0.0333	0.0133
Ovarian (serous, MA incl. CIMBA)	rs1191686	2	114094703	T	C	0.0217	0.0168
Ovarian (serous, MA incl. CIMBA)	rs1867868	2	114162983	T	C	-0.0091	0.0131
Ovarian (serous, MA incl. CIMBA)	rs3977064	2	114191728	A	C	0.0064	0.0277
Endometrial (overall)	rs9308676	2	113428167	A	G	0.0102535	0.015434
Endometrial (overall)	rs7594852	2	113521754	T	C	-0.0241391	0.0153136
Endometrial (overall)	rs3783548	2	113533333	A	G	-0.0582274	0.0274681
Endometrial (overall)	rs62157451	2	113608418	C	G	-0.0463665	0.0323813
Endometrial (overall)	rs4591347	2	113658705	T	C	0.026195	0.0214142
Endometrial (overall)	rs7584409	2	113742734	A	G	0.0155235	0.0167107
Endometrial (overall)	rs114189538	2	113821082	A	G	0.0425939	0.0315253
Endometrial (overall)	rs6743376	2	113832333	A	C	0.0173707	0.0159596
Endometrial (overall)	rs6734238	2	113841030	G	A	-0.0328224	0.0155206
Endometrial (overall)	rs6723639	2	113872238	T	C	0.0273724	0.0195922
Endometrial (overall)	rs74667587	2	113895079	A	G	0.0312076	0.0200586
Endometrial (overall)	rs72829856	2	113913287	A	G	-0.012137	0.0275768
Endometrial (overall)	rs45592842	2	113943063	G	T	0.0114349	0.0308314
Endometrial (overall)	rs72831808	2	113979355	C	G	-0.0201016	0.0360358
Endometrial (overall)	rs1491585	2	114003621	G	A	0.00656566	0.0155234
Endometrial (overall)	rs1191686	2	114094703	C	T	0.0184667	0.019424
Endometrial (overall)	rs1867868	2	114162983	C	T	-0.00301665	0.0154393
Endometrial (overall)	rs3977064	2	114191728	C	A	0.0283507	0.0351746
Endometrial (endometrioid)	rs9308676	2	113428167	A	G	0.015469	0.0181652
Endometrial (endometrioid)	rs7594852	2	113521754	T	C	-0.0142163	0.0180385
Endometrial (endometrioid)	rs3783548	2	113533333	A	G	-0.0237757	0.032443
Endometrial (endometrioid)	rs62157451	2	113608418	C	G	-0.0593143	0.0383368
Endometrial (endometrioid)	rs4591347	2	113658705	T	C	0.0369253	0.0251462
Endometrial (endometrioid)	rs7584409	2	113742734	A	G	-0.000349853	0.0196278
Endometrial (endometrioid)	rs114189538	2	113821082	A	G	0.0537531	0.0367991
Endometrial (endometrioid)	rs6743376	2	113832333	A	C	0.0119368	0.0187626
Endometrial (endometrioid)	rs6734238	2	113841030	G	A	-0.0515999	0.018231
Endometrial (endometrioid)	rs6723639	2	113872238	T	C	0.035066	0.0229962
Endometrial (endometrioid)	rs74667587	2	113895079	A	G	0.0198806	0.0236085
Endometrial (endometrioid)	rs72829856	2	113913287	A	G	-0.0240115	0.0323667
Endometrial (endometrioid)	rs45592842	2	113943063	G	T	-0.0292172	0.0360227
Endometrial (endometrioid)	rs72831808	2	113979355	C	G	-0.00887696	0.0423469
Endometrial (endometrioid)	rs1491585	2	114003621	G	A	0.0164231	0.0182775
Endometrial (endometrioid)	rs1191686	2	114094703	C	T	0.0134122	0.0228227
Endometrial (endometrioid)	rs1867868	2	114162983	C	T	0.0113629	0.0181861
Endometrial (endometrioid)	rs3977064	2	114191728	C	A	0.0401036	0.0412241
Endometrial (non-endometrioid)	rs9308676	2	113428167	A	G	0.0265189	0.0441506
Endometrial (non-endometrioid)	rs7594852	2	113521754	T	C	-0.0289417	0.0438623
Endometrial (non-endometrioid)	rs3783548	2	113533333	A	G	-0.0942945	0.077561
Endometrial (non-endometrioid)	rs62157451	2	113608418	C	G	-0.0455436	0.092502
Endometrial (non-endometrioid)	rs4591347	2	113658705	T	C	0.00756598	0.0614902
Endometrial (non-endometrioid)	rs7584409	2	113742734	A	G	-0.00458344	0.0481679
Endometrial (non-endometrioid)	rs114189538	2	113821082	A	G	-0.0750358	0.0947785
Endometrial (non-endometrioid)	rs6743376	2	113832333	A	C	0.0156114	0.0459586
Endometrial (non-endometrioid)	rs6734238	2	113841030	G	A	0.00403281	0.044561
Endometrial (non-endometrioid)	rs6723639	2	113872238	T	C	0.0557757	0.0555422
Endometrial (non-endometrioid)	rs74667587	2	113895079	A	G	0.0450902	0.0578797
Endometrial (non-endometrioid)	rs72829856	2	113913287	A	G	-0.0221683	0.0795552
Endometrial (non-endometrioid)	rs45592842	2	113943063	G	T	-0.00609437	0.0882708
Endometrial (non-endometrioid)	rs72831808	2	113979355	C	G	-0.0091461	0.103645
Endometrial (non-endometrioid)	rs1491585	2	114003621	G	A	0.0195971	0.0447742
Endometrial (non-endometrioid)	rs1191686	2	114094703	C	T	-0.0159183	0.0565409
Endometrial (non-endometrioid)	rs1867868	2	114162983	C	T	-0.0207964	0.0446869
Endometrial (non-endometrioid)	rs3977064	2	114191728	C	A	0.0248803	0.093917
Lung (adenocarcinoma)	rs9308676	2	113428167	A	G	0.00826773	0.01634
Lung (adenocarcinoma)	rs7594852	2	113521754	T	C	-0.0191054	0.016168
Lung (adenocarcinoma)	rs3783548	2	113533333	G	A	-0.00104445	0.030765
Lung (adenocarcinoma)	rs62157451	2	113608418	C	G	-0.0177903	0.034561
Lung (adenocarcinoma)	rs4591347	2	113658705	T	C	0.032045	0.022835
Lung (adenocarcinoma)	rs7584409	2	113742734	G	A	-0.000270963	0.017601
Lung (adenocarcinoma)	rs6743376	2	113832333	C	A	-0.0187835	0.016992
Lung (adenocarcinoma)	rs6734238	2	113841030	G	A	-0.00592243	0.016509
Lung (adenocarcinoma)	rs6723639	2	113872238	T	C	-0.0232389	0.021149
Lung (adenocarcinoma)	rs74667587	2	113895079	A	G	0.0337616	0.021484
Lung (adenocarcinoma)	rs72829856	2	113913287	A	G	0.0270031	0.030889
Lung (adenocarcinoma)	rs45592842	2	113943063	G	T	0.0113886	0.032993
Lung (adenocarcinoma)	rs72831808	2	113979355	C	G	-0.0150172	0.039506
Lung (adenocarcinoma)	rs1491585	2	114003621	G	A	-0.0204005	0.016217
Lung (adenocarcinoma)	rs1191686	2	114094703	T	C	0.00684452	0.020588
Lung (adenocarcinoma)	rs1867868	2	114162983	T	C	0.0122556	0.016658
Lung (ever smokers)	rs9308676	2	113428167	A	G	0.0172002	0.015008
Lung (ever smokers)	rs7594852	2	113521754	T	C	-0.0398246	0.014835
Lung (ever smokers)	rs3783548	2	113533333	G	A	0.00727439	0.028562
Lung (ever smokers)	rs62157451	2	113608418	C	G	-0.025126	0.031807
Lung (ever smokers)	rs4591347	2	113658705	T	C	0.0500313	0.021427
Lung (ever smokers)	rs7584409	2	113742734	G	A	0.00144104	0.016244
Lung (ever smokers)	rs114189538	2	113821082	A	G	0.00702626	0.031626
Lung (ever smokers)	rs6743376	2	113832333	C	A	0.0256676	0.015571
Lung (ever smokers)	rs6734238	2	113841030	G	A	-0.0164175	0.015225
Lung (ever smokers)	rs6723639	2	113872238	T	C	-0.020165	0.019411
Lung (ever smokers)	rs74667587	2	113895079	A	G	0.00571365	0.019837
Lung (ever smokers)	rs72829856	2	113913287	A	G	-0.0382804	0.028676
Lung (ever smokers)	rs45592842	2	113943063	G	T	-0.0368082	0.031049
Lung (ever smokers)	rs72831808	2	113979355	C	G	-0.023199	0.036149
Lung (ever smokers)	rs1491585	2	114003621	G	A	-0.00323576	0.014796
Lung (ever smokers)	rs1191686	2	114094703	T	C	-0.0101039	0.018952
Lung (ever smokers)	rs1867868	2	114162983	T	C	0.0166063	0.015665
Lung (ever smokers)	rs3977064	2	114191728	C	A	-0.0650731	0.037629
Lung (never smokers)	rs9308676	2	113428167	A	G	-0.0288152	0.035408
Lung (never smokers)	rs7594852	2	113521754	T	C	-0.0315866	0.034961
Lung (never smokers)	rs3783548	2	113533333	G	A	-0.0252417	0.067504
Lung (never smokers)	rs62157451	2	113608418	C	G	0.0936379	0.074103
Lung (never smokers)	rs4591347	2	113658705	T	C	0.0211057	0.049378
Lung (never smokers)	rs7584409	2	113742734	G	A	0.0428261	0.038599
Lung (never smokers)	rs114189538	2	113821082	A	G	-0.00954945	0.074422
Lung (never smokers)	rs6743376	2	113832333	C	A	-0.0366578	0.037185
Lung (never smokers)	rs6734238	2	113841030	G	A	0.0448802	0.035999
Lung (never smokers)	rs6723639	2	113872238	T	C	-0.0478225	0.046511
Lung (never smokers)	rs74667587	2	113895079	A	G	0.0723458	0.047248
Lung (never smokers)	rs72829856	2	113913287	A	G	0.0468855	0.068779
Lung (never smokers)	rs45592842	2	113943063	G	T	-0.064552	0.073856
Lung (never smokers)	rs72831808	2	113979355	C	G	0.205476	0.086318
Lung (never smokers)	rs1491585	2	114003621	G	A	0.0489161	0.035547
Lung (never smokers)	rs1191686	2	114094703	T	C	0.0400713	0.045414
Lung (never smokers)	rs1867868	2	114162983	T	C	-0.0514733	0.035957
Lung (never smokers)	rs3977064	2	114191728	C	A	0.0178341	0.081684
Lung (overall)	rs9308676	2	113428167	A	G	0.0186981	0.011805
Lung (overall)	rs7594852	2	113521754	T	C	-0.0167881	0.011716
Lung (overall)	rs3783548	2	113533333	G	A	-0.000589826	0.022273
Lung (overall)	rs4591347	2	113658705	T	C	0.0290354	0.016737
Lung (overall)	rs7584409	2	113742734	G	A	0.00962618	0.012772
Lung (overall)	rs114189538	2	113821082	A	G	0.0243716	0.025079
Lung (overall)	rs6743376	2	113832333	C	A	0.0133426	0.012294
Lung (overall)	rs6734238	2	113841030	G	A	-0.00830145	0.011971
Lung (overall)	rs6723639	2	113872238	T	C	-0.0205119	0.015214
Lung (overall)	rs74667587	2	113895079	A	G	0.0203123	0.015577
Lung (overall)	rs72829856	2	113913287	A	G	-0.0121151	0.022386
Lung (overall)	rs45592842	2	113943063	G	T	-0.0222604	0.023738
Lung (overall)	rs72831808	2	113979355	C	G	-0.0177934	0.028206
Lung (overall)	rs1491585	2	114003621	G	A	-0.00586576	0.011749
Lung (overall)	rs1191686	2	114094703	T	C	-0.00385442	0.014964
Lung (overall)	rs1867868	2	114162983	T	C	0.0102829	0.012203
Lung (small cell)	rs9308676	2	113428167	A	G	-0.0213779	0.029812
Lung (small cell)	rs7594852	2	113521754	T	C	-0.0678721	0.029594
Lung (small cell)	rs4591347	2	113658705	T	C	0.0408626	0.04292
Lung (small cell)	rs7584409	2	113742734	G	A	-0.00487709	0.03251
Lung (small cell)	rs114189538	2	113821082	A	G	-0.121453	0.065511
Lung (small cell)	rs6743376	2	113832333	C	A	0.0165522	0.031205
Lung (small cell)	rs6734238	2	113841030	G	A	-0.0407676	0.030146
Lung (small cell)	rs6723639	2	113872238	T	C	-0.0447725	0.038518
Lung (small cell)	rs74667587	2	113895079	A	G	-0.0170149	0.039687
Lung (small cell)	rs72829856	2	113913287	A	G	0.0214268	0.056665
Lung (small cell)	rs45592842	2	113943063	G	T	-0.150094	0.062706
Lung (small cell)	rs72831808	2	113979355	C	G	0.0238679	0.07116
Lung (small cell)	rs1491585	2	114003621	G	A	-0.0109963	0.029654
Lung (small cell)	rs1191686	2	114094703	T	C	-0.0343906	0.038405
Lung (small cell)	rs1867868	2	114162983	T	C	0.0106847	0.031225
Lung (small cell)	rs3977064	2	114191728	C	A	0.000593176	0.077151
Lung (squamous cell)	rs9308676	2	113428167	A	G	0.0488864	0.018812
Lung (squamous cell)	rs7594852	2	113521754	T	C	-0.00748192	0.018705
Lung (squamous cell)	rs3783548	2	113533333	G	A	-0.00722087	0.035912
Lung (squamous cell)	rs4591347	2	113658705	T	C	0.0288148	0.027021
Lung (squamous cell)	rs7584409	2	113742734	G	A	-0.000986513	0.020515
Lung (squamous cell)	rs114189538	2	113821082	A	G	0.0644291	0.040007
Lung (squamous cell)	rs6743376	2	113832333	C	A	0.0422344	0.019688
Lung (squamous cell)	rs6734238	2	113841030	G	A	-0.030826	0.019169
Lung (squamous cell)	rs6723639	2	113872238	T	C	-0.0125717	0.024344
Lung (squamous cell)	rs74667587	2	113895079	A	G	0.0252291	0.025084
Lung (squamous cell)	rs72829856	2	113913287	A	G	-0.0344248	0.036176
Lung (squamous cell)	rs45592842	2	113943063	G	T	-0.0521502	0.038574
Lung (squamous cell)	rs72831808	2	113979355	C	G	0.012782	0.04509
Lung (squamous cell)	rs1491585	2	114003621	G	A	0.000587172	0.018727
Lung (squamous cell)	rs1191686	2	114094703	T	C	-0.0135514	0.024074
Lung (squamous cell)	rs1867868	2	114162983	T	C	-0.00738823	0.019677
Lung (squamous cell)	rs3977064	2	114191728	C	A	-0.0678343	0.048741
Ovarian (overall, invasive)	rs9308676	2	113428167	A	G	0.001067	0.01339
Ovarian (overall, invasive)	rs7594852	2	113521754	T	C	0.02006	0.01346
Ovarian (overall, invasive)	rs3783548	2	113533333	A	G	-0.03797	0.02606
Ovarian (overall, invasive)	rs62157451	2	113608418	C	G	-0.04014	0.03017
Ovarian (overall, invasive)	rs4591347	2	113658705	T	C	-0.03839	0.0192
Ovarian (overall, invasive)	rs7584409	2	113742734	A	G	-0.01589	0.01459
Ovarian (overall, invasive)	rs114189538	2	113821082	A	G	0.03523	0.02945
Ovarian (overall, invasive)	rs6743376	2	113832333	A	C	-0.02232	0.01387
Ovarian (overall, invasive)	rs6734238	2	113841030	G	A	0.01068	0.0137
Ovarian (overall, invasive)	rs6723639	2	113872238	T	C	0.004948	0.01803
Ovarian (overall, invasive)	rs74667587	2	113895079	A	G	0.02264	0.01885
Ovarian (overall, invasive)	rs72829856	2	113913287	A	G	-0.005432	0.02593
Ovarian (overall, invasive)	rs45592842	2	113943063	G	T	-0.05162	0.03095
Ovarian (overall, invasive)	rs72831808	2	113979355	C	G	-0.04379	0.03576
Ovarian (overall, invasive)	rs1491585	2	114003621	G	A	0.01446	0.0136
Ovarian (overall, invasive)	rs1191686	2	114094703	C	T	0.008414	0.01719
Ovarian (overall, invasive)	rs1867868	2	114162983	C	T	-0.008345	0.01346
Ovarian (overall, invasive)	rs3977064	2	114191728	C	A	0.01775	0.03321
Ovarian (clearcell, invasive)	rs9308676	2	113428167	A	G	-0.01798	0.04048
Ovarian (clearcell, invasive)	rs7594852	2	113521754	T	C	-0.03324	0.04068
Ovarian (clearcell, invasive)	rs3783548	2	113533333	A	G	-0.07469	0.07724
Ovarian (clearcell, invasive)	rs62157451	2	113608418	C	G	-0.03714	0.09153
Ovarian (clearcell, invasive)	rs4591347	2	113658705	T	C	-0.1603	0.06031
Ovarian (clearcell, invasive)	rs7584409	2	113742734	A	G	-0.01516	0.04406
Ovarian (clearcell, invasive)	rs114189538	2	113821082	A	G	-0.09545	0.09257
Ovarian (clearcell, invasive)	rs6743376	2	113832333	A	C	0.00621	0.04201
Ovarian (clearcell, invasive)	rs6734238	2	113841030	G	A	0.01629	0.0415
Ovarian (clearcell, invasive)	rs6723639	2	113872238	T	C	-0.03924	0.05498
Ovarian (clearcell, invasive)	rs74667587	2	113895079	A	G	0.05624	0.05649
Ovarian (clearcell, invasive)	rs72829856	2	113913287	A	G	0.0239	0.07701
Ovarian (clearcell, invasive)	rs45592842	2	113943063	G	T	-0.03693	0.09304
Ovarian (clearcell, invasive)	rs72831808	2	113979355	C	G	-0.0121	0.1061
Ovarian (clearcell, invasive)	rs1491585	2	114003621	G	A	-0.05973	0.041
Ovarian (clearcell, invasive)	rs1191686	2	114094703	C	T	-0.05925	0.05287
Ovarian (clearcell, invasive)	rs1867868	2	114162983	C	T	0.05461	0.04071
Ovarian (clearcell, invasive)	rs3977064	2	114191728	C	A	-0.1033	0.09885
Ovarian (endometrioid, invasive)	rs9308676	2	113428167	A	G	0.02035	0.02896
Ovarian (endometrioid, invasive)	rs7594852	2	113521754	T	C	0.003708	0.02915
Ovarian (endometrioid, invasive)	rs3783548	2	113533333	A	G	-0.1294	0.05437
Ovarian (endometrioid, invasive)	rs62157451	2	113608418	C	G	0.003179	0.06484
Ovarian (endometrioid, invasive)	rs4591347	2	113658705	T	C	0.01369	0.04097
Ovarian (endometrioid, invasive)	rs7584409	2	113742734	A	G	-0.02576	0.03143
Ovarian (endometrioid, invasive)	rs114189538	2	113821082	A	G	0.07979	0.06243
Ovarian (endometrioid, invasive)	rs6743376	2	113832333	A	C	0.01183	0.03013
Ovarian (endometrioid, invasive)	rs6734238	2	113841030	G	A	0.03154	0.02978
Ovarian (endometrioid, invasive)	rs6723639	2	113872238	T	C	-0.02957	0.03925
Ovarian (endometrioid, invasive)	rs74667587	2	113895079	A	G	0.02259	0.04072
Ovarian (endometrioid, invasive)	rs72829856	2	113913287	A	G	0.01796	0.05563
Ovarian (endometrioid, invasive)	rs45592842	2	113943063	G	T	0.01474	0.06811
Ovarian (endometrioid, invasive)	rs72831808	2	113979355	C	G	-0.01656	0.07672
Ovarian (endometrioid, invasive)	rs1491585	2	114003621	G	A	0.02919	0.0295
Ovarian (endometrioid, invasive)	rs1191686	2	114094703	C	T	0.01086	0.03713
Ovarian (endometrioid, invasive)	rs1867868	2	114162983	C	T	-0.02184	0.02923
Ovarian (endometrioid, invasive)	rs3977064	2	114191728	C	A	-0.03729	0.07159
Ovarian (borderline)	rs9308676	2	113428167	A	G	0.02399	0.02862
Ovarian (borderline)	rs7594852	2	113521754	T	C	-0.02481	0.0287
Ovarian (borderline)	rs3783548	2	113533333	A	G	-0.03018	0.05524
Ovarian (borderline)	rs62157451	2	113608418	C	G	-0.07304	0.06515
Ovarian (borderline)	rs4591347	2	113658705	T	C	-0.04275	0.04087
Ovarian (borderline)	rs7584409	2	113742734	A	G	-0.01566	0.03116
Ovarian (borderline)	rs114189538	2	113821082	A	G	-0.09558	0.06403
Ovarian (borderline)	rs6743376	2	113832333	A	C	0.007395	0.02977
Ovarian (borderline)	rs6734238	2	113841030	G	A	-0.006562	0.02929
Ovarian (borderline)	rs6723639	2	113872238	T	C	-0.02148	0.03845
Ovarian (borderline)	rs74667587	2	113895079	A	G	-0.008974	0.04042
Ovarian (borderline)	rs72829856	2	113913287	A	G	0.00274	0.05548
Ovarian (borderline)	rs45592842	2	113943063	G	T	0.03913	0.06724
Ovarian (borderline)	rs72831808	2	113979355	C	G	-0.07824	0.07737
Ovarian (borderline)	rs1491585	2	114003621	G	A	-0.04413	0.02903
Ovarian (borderline)	rs1191686	2	114094703	C	T	0.03814	0.03627
Ovarian (borderline)	rs1867868	2	114162983	C	T	-0.03469	0.02872
Ovarian (borderline)	rs3977064	2	114191728	C	A	-0.02418	0.07106
Ovarian (mucinous, invasive)	rs9308676	2	113428167	A	G	0.04449	0.04003
Ovarian (mucinous, invasive)	rs7594852	2	113521754	T	C	-0.02971	0.04039
Ovarian (mucinous, invasive)	rs3783548	2	113533333	A	G	-0.1449	0.07435
Ovarian (mucinous, invasive)	rs62157451	2	113608418	C	G	-0.04046	0.09087
Ovarian (mucinous, invasive)	rs4591347	2	113658705	T	C	-0.1305	0.05959
Ovarian (mucinous, invasive)	rs7584409	2	113742734	A	G	-0.06298	0.04342
Ovarian (mucinous, invasive)	rs114189538	2	113821082	A	G	-0.08326	0.09234
Ovarian (mucinous, invasive)	rs6743376	2	113832333	A	C	-0.08391	0.04109
Ovarian (mucinous, invasive)	rs6734238	2	113841030	G	A	0.0656	0.04151
Ovarian (mucinous, invasive)	rs6723639	2	113872238	T	C	-0.1593	0.05571
Ovarian (mucinous, invasive)	rs74667587	2	113895079	A	G	0.01338	0.05647
Ovarian (mucinous, invasive)	rs72829856	2	113913287	A	G	0.169	0.07259
Ovarian (mucinous, invasive)	rs45592842	2	113943063	G	T	-0.1126	0.08982
Ovarian (mucinous, invasive)	rs72831808	2	113979355	C	G	0.05125	0.1025
Ovarian (mucinous, invasive)	rs1491585	2	114003621	G	A	-0.1975	0.04051
Ovarian (mucinous, invasive)	rs1191686	2	114094703	C	T	-0.03952	0.05194
Ovarian (mucinous, invasive)	rs1867868	2	114162983	C	T	-0.02838	0.04036
Ovarian (mucinous, invasive)	rs3977064	2	114191728	C	A	0.05059	0.09974
Ovarian (mucinous, borderline & invasive)	rs9308676	2	113428167	A	G	0.03556	0.0303
Ovarian (mucinous, borderline & invasive)	rs7594852	2	113521754	T	C	-0.02857	0.03056
Ovarian (mucinous, borderline & invasive)	rs3783548	2	113533333	A	G	-0.1024	0.0569
Ovarian (mucinous, borderline & invasive)	rs62157451	2	113608418	C	G	-0.08146	0.06992
Ovarian (mucinous, borderline & invasive)	rs4591347	2	113658705	T	C	-0.1106	0.04458
Ovarian (mucinous, borderline & invasive)	rs7584409	2	113742734	A	G	-0.04917	0.03297
Ovarian (mucinous, borderline & invasive)	rs114189538	2	113821082	A	G	-0.05804	0.0684
Ovarian (mucinous, borderline & invasive)	rs6743376	2	113832333	A	C	-0.04069	0.03138
Ovarian (mucinous, borderline & invasive)	rs6734238	2	113841030	G	A	0.04802	0.03135
Ovarian (mucinous, borderline & invasive)	rs6723639	2	113872238	T	C	-0.127	0.0418
Ovarian (mucinous, borderline & invasive)	rs74667587	2	113895079	A	G	0.01526	0.04253
Ovarian (mucinous, borderline & invasive)	rs72829856	2	113913287	A	G	0.1302	0.05631
Ovarian (mucinous, borderline & invasive)	rs45592842	2	113943063	G	T	-0.04629	0.06942
Ovarian (mucinous, borderline & invasive)	rs72831808	2	113979355	C	G	-0.002064	0.07967
Ovarian (mucinous, borderline & invasive)	rs1491585	2	114003621	G	A	-0.1795	0.03077
Ovarian (mucinous, borderline & invasive)	rs1191686	2	114094703	C	T	-0.04474	0.03936
Ovarian (mucinous, borderline & invasive)	rs1867868	2	114162983	C	T	-0.01728	0.0306
Ovarian (mucinous, borderline & invasive)	rs3977064	2	114191728	C	A	0.06331	0.07632
Ovarian (mucinous, borderline)	rs9308676	2	113428167	A	G	0.02656	0.04451
Ovarian (mucinous, borderline)	rs7594852	2	113521754	T	C	-0.02106	0.04481
Ovarian (mucinous, borderline)	rs3783548	2	113533333	A	G	-0.04688	0.08484
Ovarian (mucinous, borderline)	rs62157451	2	113608418	C	G	-0.1183	0.105
Ovarian (mucinous, borderline)	rs4591347	2	113658705	T	C	-0.1031	0.06496
Ovarian (mucinous, borderline)	rs7584409	2	113742734	A	G	-0.03894	0.04845
Ovarian (mucinous, borderline)	rs114189538	2	113821082	A	G	-0.04119	0.09849
Ovarian (mucinous, borderline)	rs6743376	2	113832333	A	C	0.005908	0.04656
Ovarian (mucinous, borderline)	rs6734238	2	113841030	G	A	0.03068	0.0459
Ovarian (mucinous, borderline)	rs6723639	2	113872238	T	C	-0.09256	0.061
Ovarian (mucinous, borderline)	rs74667587	2	113895079	A	G	0.01568	0.06225
Ovarian (mucinous, borderline)	rs72829856	2	113913287	A	G	0.08924	0.08468
Ovarian (mucinous, borderline)	rs45592842	2	113943063	G	T	0.04265	0.105
Ovarian (mucinous, borderline)	rs72831808	2	113979355	C	G	-0.05827	0.1206
Ovarian (mucinous, borderline)	rs1491585	2	114003621	G	A	-0.1617	0.04538
Ovarian (mucinous, borderline)	rs1191686	2	114094703	C	T	-0.05318	0.058
Ovarian (mucinous, borderline)	rs1867868	2	114162983	C	T	0.007518	0.04494
Ovarian (mucinous, borderline)	rs3977064	2	114191728	C	A	0.07304	0.1139
Ovarian (serous, borderline & invasive LG)	rs9308676	2	113428167	A	G	0.0309	0.02902
Ovarian (serous, borderline & invasive LG)	rs7594852	2	113521754	T	C	-0.008804	0.0292
Ovarian (serous, borderline & invasive LG)	rs3783548	2	113533333	A	G	-0.007601	0.05685
Ovarian (serous, borderline & invasive LG)	rs62157451	2	113608418	C	G	-0.01918	0.06521
Ovarian (serous, borderline & invasive LG)	rs4591347	2	113658705	T	C	-0.02176	0.04122
Ovarian (serous, borderline & invasive LG)	rs7584409	2	113742734	A	G	0.006511	0.03172
Ovarian (serous, borderline & invasive LG)	rs114189538	2	113821082	A	G	-0.09106	0.06515
Ovarian (serous, borderline & invasive LG)	rs6743376	2	113832333	A	C	0.0005646	0.03019
Ovarian (serous, borderline & invasive LG)	rs6734238	2	113841030	G	A	-0.001676	0.02979
Ovarian (serous, borderline & invasive LG)	rs6723639	2	113872238	T	C	0.01511	0.03857
Ovarian (serous, borderline & invasive LG)	rs74667587	2	113895079	A	G	-0.03172	0.04142
Ovarian (serous, borderline & invasive LG)	rs72829856	2	113913287	A	G	-0.0172	0.05651
Ovarian (serous, borderline & invasive LG)	rs45592842	2	113943063	G	T	0.0003823	0.06738
Ovarian (serous, borderline & invasive LG)	rs72831808	2	113979355	C	G	-0.05154	0.07733
Ovarian (serous, borderline & invasive LG)	rs1491585	2	114003621	G	A	-0.00117	0.02951
Ovarian (serous, borderline & invasive LG)	rs1191686	2	114094703	C	T	0.05891	0.03667
Ovarian (serous, borderline & invasive LG)	rs1867868	2	114162983	C	T	-0.03887	0.02911
Ovarian (serous, borderline & invasive LG)	rs3977064	2	114191728	C	A	-0.01463	0.07244
Ovarian Serous (invasive LG & HG)	rs9308676	2	113428167	A	G	0.001601	0.01545
Ovarian Serous (invasive LG & HG)	rs7594852	2	113521754	T	C	0.029	0.01554
Ovarian Serous (invasive LG & HG)	rs3783548	2	113533333	A	G	-0.003621	0.03029
Ovarian Serous (invasive LG & HG)	rs62157451	2	113608418	C	G	-0.04874	0.03491
Ovarian Serous (invasive LG & HG)	rs4591347	2	113658705	T	C	-0.02964	0.02207
Ovarian Serous (invasive LG & HG)	rs7584409	2	113742734	A	G	-0.008264	0.01686
Ovarian Serous (invasive LG & HG)	rs114189538	2	113821082	A	G	0.0359	0.0339
Ovarian Serous (invasive LG & HG)	rs6743376	2	113832333	A	C	-0.03003	0.01602
Ovarian Serous (invasive LG & HG)	rs6734238	2	113841030	G	A	0.01117	0.0158
Ovarian Serous (invasive LG & HG)	rs6723639	2	113872238	T	C	0.01948	0.02078
Ovarian Serous (invasive LG & HG)	rs74667587	2	113895079	A	G	0.00606	0.02181
Ovarian Serous (invasive LG & HG)	rs72829856	2	113913287	A	G	-0.01953	0.03013
Ovarian Serous (invasive LG & HG)	rs45592842	2	113943063	G	T	-0.04362	0.03571
Ovarian Serous (invasive LG & HG)	rs72831808	2	113979355	C	G	-0.03733	0.04128
Ovarian Serous (invasive LG & HG)	rs1491585	2	114003621	G	A	0.02979	0.01573
Ovarian Serous (invasive LG & HG)	rs1191686	2	114094703	C	T	0.01396	0.01979
Ovarian Serous (invasive LG & HG)	rs1867868	2	114162983	C	T	-0.00269	0.01554
Ovarian Serous (invasive LG & HG)	rs3977064	2	114191728	C	A	0.01829	0.03852
Ovarian (serous, invasive HG)	rs9308676	2	113428167	A	G	-0.0009805	0.01592
Ovarian (serous, invasive HG)	rs7594852	2	113521754	T	C	0.0299	0.01599
Ovarian (serous, invasive HG)	rs3783548	2	113533333	A	G	-0.004034	0.03117
Ovarian (serous, invasive HG)	rs62157451	2	113608418	C	G	-0.05754	0.03594
Ovarian (serous, invasive HG)	rs4591347	2	113658705	T	C	-0.02805	0.02271
Ovarian (serous, invasive HG)	rs7584409	2	113742734	A	G	-0.01125	0.01734
Ovarian (serous, invasive HG)	rs114189538	2	113821082	A	G	0.03611	0.03486
Ovarian (serous, invasive HG)	rs6743376	2	113832333	A	C	-0.03131	0.01648
Ovarian (serous, invasive HG)	rs6734238	2	113841030	G	A	0.007539	0.01625
Ovarian (serous, invasive HG)	rs6723639	2	113872238	T	C	0.02123	0.02142
Ovarian (serous, invasive HG)	rs74667587	2	113895079	A	G	0.009126	0.02245
Ovarian (serous, invasive HG)	rs72829856	2	113913287	A	G	-0.02669	0.03106
Ovarian (serous, invasive HG)	rs45592842	2	113943063	G	T	-0.04144	0.03681
Ovarian (serous, invasive HG)	rs72831808	2	113979355	C	G	-0.04511	0.04257
Ovarian (serous, invasive HG)	rs1491585	2	114003621	G	A	0.03711	0.01621
Ovarian (serous, invasive HG)	rs1191686	2	114094703	C	T	0.01586	0.02035
Ovarian (serous, invasive HG)	rs1867868	2	114162983	C	T	-0.002199	0.01599
Ovarian (serous, invasive HG)	rs3977064	2	114191728	C	A	0.008673	0.03956
Ovarian (serous, borderline)	rs9308676	2	113428167	A	G	0.02504	0.03522
Ovarian (serous, borderline)	rs7594852	2	113521754	T	C	-0.03359	0.03529
Ovarian (serous, borderline)	rs3783548	2	113533333	A	G	-0.03168	0.06824
Ovarian (serous, borderline)	rs62157451	2	113608418	C	G	-0.05626	0.07924
Ovarian (serous, borderline)	rs4591347	2	113658705	T	C	-0.01062	0.04991
Ovarian (serous, borderline)	rs7584409	2	113742734	A	G	-0.0004677	0.03848
Ovarian (serous, borderline)	rs114189538	2	113821082	A	G	-0.1394	0.07967
Ovarian (serous, borderline)	rs6743376	2	113832333	A	C	0.01021	0.03663
Ovarian (serous, borderline)	rs6734238	2	113841030	G	A	-0.02157	0.036
Ovarian (serous, borderline)	rs6723639	2	113872238	T	C	0.01729	0.04701
Ovarian (serous, borderline)	rs74667587	2	113895079	A	G	-0.02744	0.05008
[truncated: 7,966 more rows]

## Sheet: S5. Summary_cis-pQTL
Supplementary Table 5
Exposure	Outcome	N_instr	IVW..OR..95.CI.	IVW..P.val	Qvalue_FDR*	Q.test..P.val	Egger..OR..95.CI.	Egger..P.slope	Egger..P.intercept	ConMix..OR..95.CI.	ConMix..P.val	W..Median..OR..95.CI.	W..Median..P.val	P..Presso.Global.test.	Outliers	Corrected.OR..95..CI	Power.in.MR	Variance.explained..R2.
IL-18	Lung (adenocarcinoma)	5	0.80,0.73,0.89	1.41e-05	0.00791169	0.790	0.74,0.54,1.02	0.068	0.621	0.80,0.72,0.89	0.002	0.79,0.70,0.89	0.000	0.865	NA		0.99	0.0506
MCSF	Ovarian (serous, borderline & invasive LG)	11	1.49,1.23,1.82	6.88e-05	0.0230798	0.712	1.13,0.66,1.95	0.655	0.285	1.54,1.26,2.09	0.001	1.40,1.08,1.81	0.011	0.739	NA		0.99	0.0457
IL-18	Lung (overall)	5	0.87,0.81,0.93	9.9e-05	0.0260497	0.963	0.91,0.73,1.15	0.434	0.646	0.87,0.81,0.93	0.001	0.88,0.80,0.96	0.003	0.955	NA		1.00	0.0506
GROa	Breast (overall)	11	1.03,1.02,1.05	0.000109	0.0260497	0.489	1.03,1.01,1.06	0.011	0.975	1.03,1.02,1.05	0.002	1.03,1.01,1.05	0.011	0.435	NA		1.00	0.2724
CTACK	Lung (never smokers)	3	1.51,1.22,1.87	0.000173	0.0363392	0.961	1.57,0.92,2.66	0.095	0.874	1.52,1.23,1.85	0.001	1.51,1.19,1.91	0.001				0.51	0.0601
IL-1ra	Endometrial (overall)	18	0.86,0.80,0.93	0.000223	0.0410548	0.771	0.89,0.75,1.05	0.158	0.705	0.85,0.79,0.93	0.001	0.86,0.78,0.96	0.005	0.829	NA		1.00	0.0754
VEGF	Prostate (advanced)	21	0.86,0.79,0.93	0.000248	0.0410548	0.597	0.91,0.79,1.03	0.144	0.329	0.76,0.61,0.97	0.023	0.92,0.83,1.02	0.121	0.392	NA		1.00	0.0725
RANTES	Ovarian (serous, MA incl. CIMBA)	1	0.70,0.57,0.85	0.00038	0.0531032												0.57	0.0091
MIP1a	Prostate (overall)	23	1.06,1.03,1.10	0.000562	0.0697568	0.204	1.02,0.95,1.09	0.614	0.145	1.06,1.03,1.09	0.003	1.05,1.01,1.10	0.020	0.283	NA		1.00	0.1724
IL-1ra	Endometrial (endometrioid)	18	0.85,0.78,0.94	0.00079	0.080854	0.769	0.81,0.66,0.98	0.031	0.519	0.83,0.73,0.91	0.004	0.84,0.74,0.96	0.009	0.753	NA		1.00	0.0754
MCSF	Ovarian (serous, invasive LG)	11	1.75,1.26,2.43	0.000795	0.080854	0.944	1.14,0.46,2.81	0.781	0.313	1.80,1.28,3.41	0.002	1.55,1.02,2.36	0.042	0.942	NA		0.27	0.0457
MIP1a	Ovarian (serous, invasive LG)	24	1.48,1.18,1.86	0.000819	0.080854	0.042	1.29,0.81,2.06	0.280	0.509	2.26,1.13,3.51	0.004	1.30,1.01,1.68	0.043	0.033	No significant outliers		0.75	0.1764
RANTES	Ovarian (overall, MA incl. CIMBA)	1	0.75,0.62,0.89	0.0013	0.109226												0.70	0.0091
MCSF	Lung (never smokers)	10	0.66,0.51,0.86	0.00153	0.118254	0.798	1.06,0.54,2.08	0.865	0.141	0.65,0.33,0.85	0.009	0.68,0.49,0.95	0.025	0.854	NA		0.38	0.042
GROa	Breast (triple negative)	11	1.07,1.02,1.11	0.00168	0.118254	0.608	1.11,1.05,1.18	0.000	0.061	1.07,1.03,1.12	0.007	1.06,1.01,1.12	0.014	0.631	NA		1.00	0.2724
MCSF	Breast (luminal B, HER2 neg.)	11	1.18,1.06,1.31	0.00185	0.118254	0.507	1.28,0.96,1.71	0.092	0.548	1.23,1.09,1.40	0.010	1.20,1.05,1.38	0.010	0.561	NA		1.00	0.0457
MCSF	Ovarian (borderline)	11	1.36,1.12,1.65	0.00197	0.118254	0.575	1.12,0.65,1.91	0.691	0.438	1.39,1.09,2.14	0.016	1.34,1.03,1.75	0.030	0.619	NA		0.62	0.0457
IL-18	Lung (ever smokers)	5	0.87,0.79,0.95	0.00213	0.123512	0.828	0.85,0.63,1.13	0.258	0.856	0.87,0.79,0.94	0.011	0.87,0.78,0.97	0.014	0.896	NA		0.98	0.0506
IL-8	Prostate (advanced)	1	0.62,0.46,0.85	0.00321	0.168343												0.29	0.0045
IL-18	Lung (never smokers)	5	0.73,0.59,0.90	0.00377	0.183144	0.996	0.75,0.37,1.49	0.407	0.936	0.73,0.59,0.90	0.007	0.73,0.57,0.95	0.018	0.999	NA		0.45	0.0506
VEGF	Lung (small cell)	21	1.27,1.08,1.50	0.00394	0.183144	0.995	1.16,0.88,1.51	0.288	0.366	1.28,1.05,1.89	0.015	1.20,0.98,1.48	0.085	0.988	NA		0.73	0.0725
IL-1ra	Breast (luminal B)	18	0.88,0.80,0.96	0.00415	0.183144	0.700	0.84,0.69,1.01	0.069	0.599	0.85,0.77,0.93	0.002	0.86,0.76,0.97	0.018	0.753	NA		1.00	0.0754
TNF-A	Breast (triple negative)	2	1.87,1.21,2.87	0.00467	0.183144	0.167											0.21	0.0044
MCSF	Endometrial (endometrioid)	11	0.84,0.74,0.95	0.00495	0.183144	0.904	0.68,0.48,0.95	0.025	0.190	0.81,0.69,0.92	0.003	0.85,0.73,1.00	0.044	0.930	NA		0.95	0.0457
GROa	Breast (luminal B)	11	1.07,1.02,1.13	0.00498	0.183144	0.316	1.05,0.97,1.13	0.202	0.413	1.08,1.03,1.13	0.003	1.07,1.01,1.13	0.019	0.479	NA		1.00	0.2724
IL-1ra	Ovarian (mucinous, invasive)	18	1.60,1.15,2.22	0.00502	0.183144	0.001	1.36,0.68,2.75	0.387	0.612	1.50,1.17,2.01	0.004	1.54,1.16,2.06	0.003	0.002	1 outlier(s)	1.46,1.12,1.91	0.52	0.0754
IL-8	Ovarian (clearcell, invasive)	1	4.01,1.51,10.62	0.00522	0.186462												0.08	0.0045
RANTES	Breast (luminal A)	1	0.84,0.75,0.95	0.00571	0.199674												0.93	0.0091
IL-8	Prostate (high vs low+int risk)	1	0.66,0.49,0.89	0.00622	0.213027												0.31	0.0045
MIP1a	Ovarian (endometrioid, invasive)	24	0.85,0.76,0.96	0.00658	0.21451	0.334	1.05,0.84,1.31	0.667	0.033	0.88,0.78,0.99	0.036	0.90,0.77,1.04	0.152	0.385	NA		0.99	0.1764
RANTES	Breast (HER2 enriched)	1	0.60,0.41,0.87	0.00757	0.231078												0.45	0.0091
VEGF	Endometrial (non-endometrioid)	21	1.43,1.10,1.86	0.00834	0.249681	0.403	1.11,0.72,1.69	0.641	0.136	2.83,0.96,5.11	0.075	1.23,0.88,1.72	0.222	0.329	NA		0.45	0.0725
MCP3	Prostate (overall)	9	1.03,1.01,1.06	0.00863	0.249681	0.519	0.99,0.93,1.05	0.684	0.079	1.06,1.03,1.10	0.009	1.04,1.01,1.08	0.017	0.210	NA		1.00	0.219
IL12p70	Prostate (high vs low+int risk)	1	1.63,1.13,2.34	0.00878	0.249681												0.14	0.0015
MIP1a	Breast (HER2 enriched)	24	1.14,1.03,1.26	0.0095	0.261427	0.933	1.11,0.91,1.35	0.310	0.744	1.14,1.02,1.31	0.027	1.09,0.95,1.24	0.219	0.937	NA		1.00	0.1764
RANTES	Ovarian Serous (invasive LG & HG)	1	0.74,0.58,0.93	0.0112	0.303954												0.46	0.0091
IL-1ra	Lung (squamous cell)	17	0.88,0.79,0.97	0.0116	0.309386	0.359	0.70,0.57,0.87	0.001	0.018	0.85,0.77,0.94	0.004	0.85,0.75,0.97	0.016	0.427	NA		0.99	0.0743
IL-7	Ovarian (serous, borderline)	1	2.56,1.23,5.33	0.0119	0.310148												0.09	0.0047
TRAIL	Breast (luminal B)	43	0.78,0.64,0.95	0.0121	0.310148	0.902	0.80,0.58,1.12	0.192	0.826	0.76,0.62,0.93	0.009	0.76,0.57,1.01	0.055	0.932	NA		0.87	0.0183
RANTES	Breast (overall)	1	0.89,0.81,0.98	0.0131	0.318606												0.99	0.0091
IL-1ra	Ovarian (mucinous, borderline & invasive)	18	1.43,1.08,1.89	0.0131	0.318606	0.000	1.13,0.63,2.04	0.684	0.380	1.27,1.05,1.58	0.019	1.26,1.02,1.57	0.036		1 outlier(s)	1.31,1.06,1.62	0.76	0.0754
MIP1b	Breast (luminal A)	21	0.95,0.92,0.99	0.0131	0.318606	0.675	0.95,0.89,1.01	0.081	0.729	0.93,0.86,1.03	0.082	0.95,0.90,1.00	0.033	0.701	NA		1.00	0.1345
SCF	Lung (squamous cell)	2	1.81,1.13,2.89	0.0133	0.318606	0.548											0.16	0.0036
RANTES	Ovarian (serous, invasive HG)	1	0.74,0.58,0.94	0.0138	0.321034												0.44	0.0091
MCSF	Ovarian (serous, borderline)	11	1.35,1.06,1.71	0.0138	0.321034	0.853	1.13,0.59,2.19	0.709	0.577	1.40,1.04,1.94	0.033	1.21,0.89,1.66	0.231	0.850	NA		0.45	0.0457
MCSF	Endometrial (overall)	11	0.88,0.79,0.97	0.0143	0.32126	0.892	0.72,0.54,0.96	0.023	0.139	0.86,0.76,0.96	0.014	0.87,0.76,1.00	0.044	0.927	NA		0.99	0.0457
MCP3	Ovarian (mucinous, borderline & invasive)	10	1.12,1.02,1.22	0.0153	0.325429	0.691	1.15,0.94,1.42	0.177	0.735	1.13,0.97,1.49	0.177	1.09,0.97,1.23	0.163	0.692	NA		1.00	0.2464
IL-1ra	Breast (luminal A)	18	1.05,1.01,1.10	0.0155	0.325429	0.983	1.07,0.98,1.17	0.126	0.661	1.06,1.02,1.10	0.009	1.06,1.00,1.11	0.050	0.991	NA		1.00	0.0754
SeSelectin	Breast (triple negative)	2	1.35,1.06,1.73	0.0159	0.325429	0.552											0.34	0.0079
IL12p70	Prostate (overall)	1	0.76,0.60,0.95	0.0161	0.325429												0.26	0.0015
activePAI	Breast (HER2 enriched)	1	2.49,1.18,5.24	0.0161	0.325429												0.19	0.0031
SCF	Breast (luminal B, HER2 neg.)	2	1.61,1.09,2.38	0.0168	0.334617	0.290											0.27	0.0036
MCSF	Breast (triple negative)	11	1.14,1.02,1.26	0.018	0.35215	0.603	0.91,0.68,1.22	0.545	0.118	1.18,0.97,1.78	0.109	1.11,0.96,1.27	0.161	0.655	NA		0.96	0.0457
VEGF	Lung (never smokers)	21	1.27,1.04,1.54	0.0183	0.353573	0.873	1.26,0.92,1.73	0.157	0.965	1.31,1.03,1.62	0.033	1.28,1.00,1.64	0.051	0.908	NA		0.59	0.0725
GROa	Lung (squamous cell)	10	1.06,1.01,1.12	0.0195	0.371025	0.490	1.08,1.00,1.17	0.044	0.534	1.06,1.01,1.12	0.027	1.07,1.00,1.13	0.037	0.570	NA		1.00	0.2679
MCP3	Prostate (high vs low risk)	9	0.93,0.87,0.99	0.0199	0.371025	0.505	0.98,0.84,1.13	0.732	0.445	0.93,0.86,1.00	0.060	0.94,0.86,1.01	0.107	0.570	NA		1.00	0.219
MIP1b	Lung (never smokers)	19	0.83,0.71,0.97	0.0211	0.388999	0.556	0.94,0.72,1.22	0.631	0.253	0.88,0.67,1.07	0.228	0.93,0.76,1.14	0.502	0.359	NA		0.82	0.1257
TNF-A	Lung (overall)	1	0.70,0.51,0.95	0.0234	0.407774												0.28	0.0028
GROa	Breast (luminal A)	11	1.03,1.00,1.05	0.0236	0.407774	0.404	1.02,0.98,1.05	0.330	0.472	1.02,1.00,1.03	0.076	1.03,1.00,1.05	0.051	0.402	NA		1.00	0.2724
RANTES	Lung (never smokers)	1	0.55,0.32,0.93	0.0259	0.432085												0.12	0.0091
RANTES	Ovarian (overall, invasive)	1	0.79,0.65,0.97	0.0268	0.439782												0.58	0.0091
MIG	Ovarian (endometrioid, invasive)	1	1.56,1.05,2.33	0.0281	0.448901												0.19	0.0111
MIF	Prostate (overall)	2	0.91,0.83,0.99	0.0296	0.458669	0.807											1.00	0.019
MIF	Ovarian (serous, invasive LG)	2	0.56,0.33,0.95	0.0298	0.458669	0.544											0.14	0.019
GROa	Lung (never smokers)	11	1.11,1.01,1.21	0.0298	0.458669	0.442	1.08,0.94,1.24	0.260	0.694	1.10,1.01,1.21	0.048	1.09,0.98,1.21	0.113	0.556	NA		0.99	0.2724
sICAM	Ovarian (mucinous, invasive)	22	0.84,0.72,0.98	0.0305	0.458669	0.564	1.14,0.76,1.70	0.528	0.105	0.71,0.55,0.90	0.006	0.78,0.62,0.98	0.030	0.507	NA		0.80	0.1468
IL-18	Ovarian (endometrioid, invasive)	5	1.21,1.02,1.44	0.0311	0.458669	0.975	1.28,0.73,2.25	0.385	0.836	1.21,1.02,1.65	0.046	1.22,0.99,1.50	0.066	0.978	NA		0.63	0.0506
MCSF	Lung (squamous cell)	10	1.16,1.01,1.33	0.032	0.458669	0.338	1.41,0.98,2.05	0.067	0.267	1.30,0.95,1.62	0.053	1.21,1.01,1.46	0.036	0.367	NA		0.91	0.0439
SCF	Breast (overall)	2	1.18,1.01,1.37	0.0322	0.458669	0.784											0.76	0.0036
IL-8	Prostate (overall)	1	0.82,0.68,0.98	0.0323	0.458669												0.61	0.0045
IL-16	Ovarian (mucinous, invasive)	17	1.37,1.03,1.84	0.0325	0.458857	0.826	1.32,0.91,1.92	0.149	0.745	1.40,1.01,2.79	0.051	1.24,0.88,1.75	0.215	0.745	NA		0.28	0.0351
MIP1a	Ovarian (serous, invasive HG)	24	0.94,0.88,0.99	0.0333	0.4654	0.792	0.93,0.82,1.05	0.236	0.887	0.93,0.78,1.04	0.247	0.97,0.89,1.05	0.427	0.762	NA		1.00	0.1764
Eotaxin	Breast (luminal B)	2	0.70,0.50,0.97	0.034	0.467426	0.644											0.40	0.0056
IL-8	Ovarian (mucinous, invasive)	1	2.76,1.06,7.17	0.0368	0.47735												0.08	0.0045
Eotaxin	Prostate (high vs low risk)	2	0.66,0.45,0.98	0.0376	0.47735	0.499											0.18	0.0056
MCP3	Breast (luminal B, HER2 neg.)	10	1.07,1.00,1.13	0.0376	0.47735	0.074	1.09,0.94,1.26	0.238	0.723	1.04,1.00,1.08	0.131	1.04,0.98,1.10	0.241	0.059	NA		1.00	0.2464
IL-7	Endometrial (non-endometrioid)	1	0.36,0.14,0.94	0.0378	0.47735												0.08	0.0047
CTACK	Lung (small cell)	3	1.21,1.01,1.45	0.0379	0.47735	0.955	1.14,0.73,1.77	0.569	0.762	1.21,1.02,1.54	0.043	1.22,1.01,1.48	0.042				0.65	0.0601
sVCAM	Ovarian (clearcell, invasive)	1	2.84,1.06,7.60	0.0381	0.47735												0.07	0.003
IL-7	Ovarian (serous, borderline & invasive LG)	1	1.90,1.03,3.49	0.0387	0.481121												0.28	0.0047
MCSF	Lung (adenocarcinoma)	11	0.89,0.80,1.00	0.0435	0.529696	0.803	0.88,0.65,1.20	0.432	0.955	0.86,0.75,0.97	0.029	0.88,0.76,1.02	0.081	0.850	NA		0.98	0.0457
IL-1ra	Ovarian (mucinous, borderline)	18	1.29,1.01,1.66	0.0436	0.529696	0.317	0.91,0.55,1.50	0.703	0.114	1.20,0.89,1.54	0.277	1.16,0.84,1.58	0.371	0.329	NA		0.45	0.0754
MIP1a	Breast (triple negative)	24	0.94,0.89,1.00	0.044	0.529696	0.654	1.05,0.93,1.17	0.456	0.043	0.96,0.85,1.01	0.185	1.01,0.93,1.09	0.840	0.413	NA		1.00	0.1764
MCSF	Ovarian (mucinous, borderline)	11	1.37,1.01,1.85	0.0449	0.529696	0.637	1.17,0.50,2.71	0.718	0.696	1.71,0.67,2.73	0.072	1.62,1.08,2.44	0.020	0.617	NA		0.30	0.0457
MIP1a	Ovarian (serous, borderline)	24	0.87,0.75,1.00	0.0449	0.529696	0.328	0.91,0.68,1.21	0.499	0.729	0.85,0.72,1.00	0.051	0.86,0.71,1.03	0.106	0.393	NA		0.95	0.1764
MCP3	Lung (ever smokers)	8	1.05,1.00,1.10	0.0451	0.529696	0.825	1.06,0.94,1.19	0.358	0.880	1.05,1.00,1.13	0.060	1.05,0.99,1.11	0.091	0.864	NA		1.00	0.2068
MCP3	Ovarian (borderline)	10	1.09,1.00,1.19	0.0473	0.543173	0.824	1.06,0.87,1.29	0.578	0.738	1.10,0.97,1.43	0.143	1.05,0.94,1.18	0.350	0.785	NA		1.00	0.2464
VEGF	Prostate (overall)	21	0.95,0.89,1.00	0.0501	0.564512	0.117	0.93,0.85,1.03	0.155	0.747	0.93,0.84,0.97	0.003	0.95,0.89,1.01	0.092	0.171	NA		1.00	0.0725
MIF	Breast (HER2 enriched)	2	0.71,0.51,1.00	0.0504	0.564512	0.222											0.75	0.019
SCF	Breast (triple negative)	2	1.46,1.00,2.13	0.0507	0.564512	0.727											0.18	0.0036
IL-1ra	Prostate (overall)	18	0.95,0.90,1.00	0.051	0.564512	0.061	1.01,0.91,1.13	0.796	0.171	0.91,0.86,1.00	0.051	0.93,0.87,0.99	0.026	0.056	NA		1.00	0.0754
IL-8	Prostate (high vs low risk)	1	0.63,0.40,1.00	0.0511	0.564512												0.15	0.0045
sVCAM	Endometrial (endometrioid)	1	0.65,0.42,1.00	0.0518	0.5682												0.15	0.003
sICAM	Prostate (high vs low+int risk)	22	0.95,0.90,1.00	0.0543	0.576252	0.384	0.97,0.84,1.12	0.689	0.715	0.94,0.84,0.99	0.062	0.92,0.86,0.99	0.034	0.415	NA		1.00	0.1468
PDGFbb	Breast (luminal B, HER2 neg.)	1	0.51,0.25,1.02	0.0583	0.604073												0.11	0.001
SCF	Lung (ever smokers)	2	1.43,0.98,2.08	0.0604	0.621714	0.552											0.19	0.0036
IL-2ra	Ovarian (mucinous, borderline & invasive)	11	0.90,0.81,1.00	0.0614	0.623009	0.640	0.91,0.76,1.09	0.302	0.936	0.89,0.76,0.98	0.038	0.90,0.78,1.03	0.115	0.705	NA		1.00	0.2326
IL-1ra	Lung (overall)	16	0.94,0.89,1.00	0.0619	0.623009	0.574	0.88,0.77,1.00	0.053	0.236	0.93,0.86,0.99	0.045	0.94,0.87,1.02	0.146	0.642	NA		1.00	0.0723
VEGF	Ovarian (mucinous, invasive)	21	1.30,0.99,1.72	0.062	0.623009	0.077	1.06,0.68,1.66	0.796	0.257	2.52,1.69,3.69	0.019	1.20,0.89,1.62	0.231	0.020	No significant outliers		0.51	0.0725
CTACK	Lung (ever smokers)	2	0.92,0.84,1.01	0.0659	0.65286	0.527											0.99	0.0562
IL-8	Ovarian (mucinous, borderline & invasive)	1	1.93,0.95,3.91	0.0678	0.654362												0.10	0.0045
IL-6	Endometrial (non-endometrioid)	1	3.86,0.90,16.50	0.0688	0.654362												0.06	0.0018
IL-16	Breast (HER2 enriched)	17	1.20,0.99,1.46	0.0697	0.654362	0.698	1.15,0.89,1.48	0.290	0.605	1.15,0.92,3.42	0.215	1.16,0.91,1.47	0.221	0.712	NA		0.95	0.0351
IL-8	Ovarian (overall, invasive)	1	1.32,0.98,1.78	0.0701	0.654362												0.33	0.0045
CTACK	Endometrial (endometrioid)	3	1.13,0.99,1.29	0.0707	0.654362	0.221	1.10,0.69,1.74	0.688	0.892	1.16, NA, NA	0.053	1.15,1.02,1.29	0.023				0.98	0.0601
IL-8	Endometrial (non-endometrioid)	1	0.42,0.16,1.08	0.0723	0.654362												0.07	0.0045
CTACK	Breast (luminal B, HER2 neg.)	3	0.92,0.84,1.01	0.0723	0.654362	0.912	0.96,0.77,1.20	0.711	0.691	0.92,0.64,1.30	0.080	0.93,0.84,1.02	0.114				1.00	0.0601
SCF	Breast (HER2 enriched)	2	1.77,0.95,3.31	0.0738	0.654362	0.947											0.21	0.0036
sVCAM	Breast (triple negative)	1	0.72,0.50,1.03	0.0741	0.654362												0.16	0.003
MCP1	Prostate (high vs low risk)	24	0.64,0.39,1.04	0.0741	0.654362	0.448	0.35,0.15,0.81	0.014	0.084	0.61,0.38,1.05	0.077	0.53,0.26,1.09	0.085	0.473	NA		0.14	0.0041
MIP1a	Ovarian (mucinous, invasive)	24	1.15,0.99,1.33	0.0741	0.654362	0.662	1.32,0.98,1.79	0.069	0.285	1.20,1.01,1.41	0.045	1.13,0.92,1.39	0.240	0.726	NA		0.87	0.1764
MCP3	Ovarian (mucinous, borderline)	10	1.13,0.99,1.29	0.0743	0.654362	0.669	1.22,0.90,1.66	0.199	0.568	1.18,0.93,1.64	0.108	1.10,0.93,1.32	0.264	0.698	NA		0.91	0.2464
IP-10	Breast (triple negative)	4	1.20,0.98,1.46	0.0744	0.654362	0.939	1.23,0.58,2.58	0.589	0.947			1.23,0.98,1.55	0.079	0.948	NA		0.51	0.0131
TRAIL	Breast (overall)	43	0.93,0.86,1.01	0.0768	0.655975	0.041	0.89,0.78,1.02	0.083	0.391	0.90,0.84,0.96	0.004	0.90,0.82,0.99	0.038	0.067	NA		1.00	0.0183
VEGF	Ovarian (mucinous, borderline)	21	0.74,0.52,1.03	0.0774	0.655975	0.022	0.66,0.37,1.16	0.151	0.633	0.31, NA, NA	0.079	0.79,0.57,1.11	0.173	0.022	No significant outliers		0.43	0.0725
TRAIL	Ovarian (endometrioid, invasive)	43	1.33,0.97,1.83	0.0783	0.659826	0.612	1.45,0.85,2.49	0.177	0.698	1.36,0.96,1.87	0.082	1.42,0.89,2.29	0.145	0.659	NA		0.28	0.0183
MCSF	Breast (overall)	11	1.04,1.00,1.08	0.079	0.659826	0.861	1.02,0.91,1.14	0.780	0.705	1.04,0.99,1.11	0.067	1.06,1.00,1.12	0.035	0.863	NA		1.00	0.0457
GROa	Ovarian (serous, borderline & invasive LG)	11	1.07,0.99,1.16	0.0805	0.660641	0.525	1.06,0.95,1.19	0.295	0.853	1.06,0.99,1.15	0.146	1.07,0.98,1.17	0.135	0.678	NA		1.00	0.2724
IL-2ra	Breast (HER2 enriched)	10	1.11,0.99,1.26	0.0813	0.661992	0.064	1.11,0.90,1.38	0.336	0.990	1.15,1.05,1.27	0.010	1.15,1.02,1.29	0.018	0.101	NA		1.00	0.1787
CTACK	Ovarian (clearcell, invasive)	3	0.81,0.64,1.03	0.0824	0.665711	0.812	0.71,0.39,1.27	0.249	0.628	0.80,0.41,2.75	0.121	0.80,0.62,1.03	0.080				0.43	0.0601
IL-7	Endometrial (overall)	1	0.75,0.54,1.04	0.0826	0.665711												0.30	0.0047
MIF	Ovarian (serous, borderline & invasive LG)	2	0.76,0.56,1.04	0.083	0.665711	0.480											0.79	0.019
GROa	Prostate (high vs low risk)	11	0.95,0.90,1.01	0.0851	0.670794	0.718	0.96,0.88,1.04	0.335	0.776	0.96,0.90,1.01	0.189	0.96,0.90,1.03	0.255	0.773	NA		1.00	0.2724
SCF	Ovarian (serous, borderline)	2	2.08,0.90,4.81	0.0859	0.673545	0.384											0.08	0.0036
MCP3	Ovarian (mucinous, invasive)	10	1.11,0.98,1.25	0.0891	0.682034	0.609	1.11,0.84,1.46	0.450	0.978	1.06,0.81,1.71	0.519	1.07,0.91,1.26	0.395	0.609	NA		0.95	0.2464
MCSF	Ovarian (mucinous, borderline & invasive)	11	1.20,0.97,1.47	0.0898	0.682034	0.995	1.20,0.68,2.12	0.539	0.999	1.21,0.93,1.59	0.088	1.25,0.96,1.62	0.096	0.993	NA		0.55	0.0457
IL-16	Ovarian (serous, borderline)	17	0.80,0.63,1.04	0.0907	0.682034	0.853	0.88,0.64,1.22	0.449	0.382	0.79,0.61,1.03	0.092	0.81,0.61,1.09	0.164	0.902	NA		0.36	0.0351
VEGF	Breast (luminal B, HER2 neg.)	21	1.10,0.98,1.22	0.0925	0.682034	0.095	1.16,0.97,1.39	0.098	0.423	1.11,0.99,1.24	0.084	1.10,0.98,1.23	0.116	0.141	NA		1.00	0.0725
IL-2ra	Lung (overall)	10	0.96,0.92,1.01	0.0929	0.682034	0.944	0.97,0.91,1.05	0.467	0.745	0.96,0.90,0.99	0.065	0.97,0.92,1.03	0.343	0.936	NA		1.00	0.1787
VEGF	Ovarian (clearcell, invasive)	21	0.82,0.65,1.03	0.0932	0.682034	0.985	0.84,0.57,1.22	0.352	0.901	0.82,0.62,1.03	0.093	0.84,0.63,1.13	0.255	0.988	NA		0.49	0.0725
IL-1ra	Lung (ever smokers)	18	0.92,0.84,1.01	0.0934	0.682034	0.123	0.86,0.71,1.04	0.126	0.401	0.93,0.85,1.01	0.128	0.92,0.83,1.02	0.102	0.166	NA		1.00	0.0754
sVCAM	Ovarian (mucinous, invasive)	1	0.45,0.17,1.15	0.0942	0.682034												0.07	0.003
IL-16	Ovarian (borderline)	17	0.84,0.68,1.03	0.0942	0.682034	0.813	0.91,0.70,1.19	0.485	0.345	0.83,0.66,1.04	0.098	0.86,0.68,1.08	0.194	0.876	NA		0.51	0.0351
SeSelectin	Ovarian (endometrioid, invasive)	2	1.49,0.93,2.38	0.0949	0.682034	0.892											0.15	0.0079
MIF	Prostate (high vs low+int risk)	2	1.13,0.98,1.30	0.0954	0.682034	0.991											0.85	0.019
IL-16	Lung (overall)	16	1.08,0.99,1.19	0.096	0.682034	0.262	1.13,1.00,1.27	0.055	0.321	1.11,1.01,1.21	0.027	1.10,1.00,1.22	0.046	0.338	NA		1.00	0.0348
IL-16	Breast (luminal B)	17	1.12,0.98,1.28	0.0974	0.685854	0.614	1.07,0.90,1.27	0.446	0.420	1.09,0.96,1.25	0.193	1.09,0.93,1.27	0.291	0.581	NA		0.99	0.0351
TNF-A	Breast (luminal A)	2	1.17,0.97,1.41	0.103	0.704887	0.258											0.66	0.0044
MIG	Endometrial (non-endometrioid)	1	1.67,0.90,3.11	0.104	0.704887												0.11	0.0111
IP-10	Breast (luminal B)	4	1.21,0.96,1.52	0.104	0.704887	0.523	0.69,0.29,1.64	0.398	0.186			1.31,0.99,1.73	0.056	0.607	NA		0.74	0.0131
IL-6	Breast (overall)	1	1.18,0.97,1.43	0.108	0.705064												0.48	0.0018
MIP1a	Ovarian (mucinous, borderline & invasive)	24	1.11,0.98,1.27	0.108	0.705064	0.150	1.15,0.88,1.50	0.312	0.795	1.08,0.95,1.24	0.229	1.10,0.94,1.28	0.257	0.192	NA		0.98	0.1764
IL-8	Lung (squamous cell)	1	1.45,0.92,2.29	0.109	0.705064												0.19	0.0045
GROa	Endometrial (non-endometrioid)	11	0.91,0.80,1.02	0.109	0.705064	0.993	0.87,0.73,1.04	0.130	0.564	0.90,0.80,1.01	0.093	0.90,0.78,1.03	0.129	0.997	NA		0.95	0.2724
IL-7	Ovarian (borderline)	1	1.63,0.89,2.96	0.111	0.705064												0.11	0.0047
MCSF	Prostate (advanced)	11	0.90,0.80,1.02	0.111	0.705264	0.071	1.06,0.75,1.50	0.729	0.322	0.84,0.67,0.96	0.013	0.88,0.77,1.01	0.062	0.090	NA		0.99	0.0457
SeSelectin	Ovarian (overall, MA incl. CIMBA)	2	1.17,0.96,1.41	0.114	0.713376	0.520											0.64	0.0079
MIP1b	Lung (squamous cell)	20	0.93,0.85,1.02	0.114	0.713376	0.779	0.95,0.83,1.10	0.517	0.699	0.91,0.75,1.02	0.122	0.95,0.85,1.06	0.333	0.752	NA		1.00	0.1269
MCP3	Breast (luminal A)	10	0.98,0.96,1.00	0.114	0.713376	0.482	1.00,0.94,1.05	0.896	0.539	0.97,0.94,1.00	0.035	0.98,0.95,1.01	0.170	0.528	NA		1.00	0.2464
MIG	Ovarian (mucinous, borderline & invasive)	1	1.39,0.92,2.11	0.116	0.71501												0.18	0.0111
SCGFb	Lung (squamous cell)	2	0.84,0.68,1.04	0.116	0.71501	0.997											0.52	0.0161
Eotaxin	Lung (overall)	3	1.18,0.96,1.46	0.117	0.71501	0.453	2.68,0.42,17.12	0.297	0.384	1.30,0.66,1.90	0.119	1.26,0.96,1.67	0.101				0.55	0.0064
TNF-A	Lung (squamous cell)	1	0.67,0.41,1.11	0.119	0.71501												0.13	0.0028
IL-2ra	Ovarian (mucinous, borderline)	11	0.88,0.76,1.03	0.119	0.71501	0.570	0.86,0.66,1.12	0.274	0.823	0.86,0.74,1.02	0.103	0.88,0.72,1.07	0.204	0.644	NA		0.89	0.2326
MIP1a	Lung (adenocarcinoma)	22	1.05,0.99,1.12	0.12	0.71501	0.821	1.04,0.92,1.19	0.505	0.880	1.04,0.97,1.14	0.292	1.05,0.96,1.14	0.284	0.865	NA		1.00	0.1591
TNF-A	Prostate (overall)	2	0.75,0.52,1.08	0.121	0.71501	0.030											0.60	0.0044
SCGFb	Ovarian (serous, MA incl. CIMBA)	2	1.12,0.97,1.30	0.121	0.71501	0.433											0.81	0.0161
TRAIL	Ovarian (serous, invasive HG)	43	0.86,0.71,1.04	0.121	0.71501	0.179	0.89,0.64,1.23	0.473	0.815	0.84,0.71,0.99	0.042	0.92,0.70,1.20	0.526	0.221	NA		0.73	0.0183
IL-2ra	Breast (luminal B, HER2 neg.)	10	0.96,0.91,1.01	0.121	0.71501	0.620	1.00,0.92,1.10	0.931	0.223	0.97,0.75,1.04	0.495	0.98,0.92,1.05	0.628	0.637	NA		1.00	0.1787
GROa	Ovarian (serous, borderline)	11	1.08,0.98,1.18	0.121	0.71501	0.504	1.08,0.94,1.24	0.271	0.928	1.08,0.99,1.19	0.132	1.08,0.97,1.20	0.187	0.609	NA		0.99	0.2724
sICAM	Lung (squamous cell)	21	0.94,0.87,1.02	0.122	0.71501	0.786	0.99,0.82,1.20	0.939	0.556	0.87,0.79,1.06	0.195	0.94,0.85,1.05	0.275	0.799	NA		1.00	0.141
HGF	Breast (overall)	6	0.93,0.85,1.02	0.123	0.71501	0.338	0.92,0.82,1.04	0.186	0.789			0.93,0.85,1.02	0.124	0.800	NA		0.99	0.0097
MIG	Ovarian (borderline)	1	1.36,0.92,2.01	0.123	0.71501												0.20	0.0111
MIP1a	Endometrial (overall)	24	1.05,0.99,1.11	0.123	0.71501	0.547	1.08,0.96,1.21	0.220	0.597	1.04,0.90,1.11	0.403	1.05,0.97,1.14	0.243	0.613	NA		1.00	0.1764
IP-10	Prostate (overall)	4	0.90,0.79,1.03	0.124	0.716884	0.186	0.62,0.42,0.93	0.021	0.062			0.93,0.82,1.06	0.299	0.251	NA		0.97	0.0131
MCP1	Ovarian (mucinous, borderline)	25	0.45,0.16,1.25	0.126	0.721749	0.581	4.73,0.79,28.36	0.089	0.002	0.45,0.03,1.25	0.127	1.52,0.35,6.60	0.579	0.158	NA		0.07	0.0043
TNF-A	Breast (overall)	2	1.15,0.96,1.39	0.126	0.721749	0.149											0.85	0.0044
VEGF	Breast (overall)	21	1.03,0.99,1.07	0.126	0.721749	0.400	1.07,1.00,1.13	0.035	0.144	1.05,1.00,1.12	0.048	1.03,0.98,1.08	0.205	0.471	NA		1.00	0.0725
SCGFb	Ovarian (mucinous, borderline & invasive)	2	1.29,0.93,1.80	0.128	0.724425	0.672											0.23	0.0161
IL-18	Endometrial (non-endometrioid)	5	0.80,0.61,1.06	0.128	0.724425	0.985	0.95,0.39,2.32	0.916	0.695	0.81,0.33,1.99	0.130	0.85,0.61,1.18	0.327	0.975	NA		0.34	0.0506
sVCAM	Endometrial (overall)	1	0.75,0.52,1.09	0.129	0.724425												0.21	0.003
MIG	Prostate (overall)	1	1.09,0.98,1.21	0.129	0.724425												0.94	0.0111
HGF	Ovarian (serous, borderline)	6	1.51,0.89,2.56	0.13	0.724877	0.322	1.91,1.07,3.41	0.028	0.124			1.54,0.91,2.59	0.105	0.130	NA		0.14	0.0097
MIP1a	Endometrial (endometrioid)	24	1.05,0.98,1.13	0.13	0.724425	0.578	1.06,0.93,1.22	0.381	0.889	1.08,0.98,1.16	0.167	1.06,0.97,1.17	0.198	0.641	NA		1.00	0.1764
SCGFb	Ovarian (overall, MA incl. CIMBA)	2	1.13,0.96,1.33	0.132	0.725324	0.219											0.91	0.0161
sVCAM	Prostate (advanced)	1	0.77,0.56,1.08	0.133	0.725324												0.21	0.003
IL-2ra	Ovarian (serous, borderline)	11	1.10,0.97,1.24	0.133	0.725324	0.905	0.98,0.80,1.20	0.844	0.178	1.20,0.96,1.72	0.121	1.05,0.90,1.23	0.509	0.779	NA		0.99	0.2326
SeSelectin	Ovarian (clearcell, invasive)	2	1.65,0.86,3.17	0.135	0.730807	0.694											0.10	0.0079
MIP1b	Prostate (high vs low+int risk)	20	0.96,0.90,1.01	0.138	0.738053	0.947	0.96,0.87,1.06	0.419	0.933	0.95,0.78,1.05	0.263	0.98,0.91,1.07	0.686	0.891	NA		1.00	0.1311
MIP1a	Ovarian (overall, invasive)	24	0.96,0.92,1.01	0.141	0.741563	0.972	1.01,0.91,1.11	0.902	0.322	0.97,0.90,1.02	0.279	0.99,0.92,1.06	0.760	0.971	NA		1.00	0.1764
TNF-A	Ovarian (endometrioid, invasive)	2	0.63,0.34,1.17	0.142	0.74439	0.630											0.10	0.0044
IL-7	Lung (squamous cell)	1	0.74,0.50,1.11	0.144	0.746031												0.19	0.0047
SeSelectin	Endometrial (non-endometrioid)	2	0.59,0.29,1.20	0.147	0.754831	0.765											0.09	0.0079
IL-7	Breast (luminal B, HER2 neg.)	1	1.27,0.92,1.75	0.148	0.754831												0.34	0.0047
IL-18	Prostate (advanced)	5	1.07,0.98,1.17	0.15	0.754831	0.359	1.34,1.02,1.75	0.036	0.088	1.12,0.83,1.15	0.108	1.13,1.01,1.26	0.026	0.315	NA		1.00	0.0506
SCF	Ovarian (mucinous, borderline & invasive)	2	0.59,0.28,1.21	0.151	0.754831	0.974											0.09	0.0036
SeSelectin	Breast (luminal A)	2	1.10,0.97,1.25	0.151	0.754831	0.506											0.89	0.0079
IL-16	Ovarian (clearcell, invasive)	17	0.81,0.61,1.08	0.151	0.754831	0.981	0.80,0.55,1.16	0.239	0.923	0.83,0.61,1.12	0.204	0.84,0.60,1.16	0.281	0.989	NA		0.27	0.0351
TNF-A	Ovarian (serous, MA incl. CIMBA)	2	1.26,0.92,1.72	0.153	0.754831	0.245											0.32	0.0044
IL-1ra	Ovarian (serous, invasive LG)	18	1.20,0.93,1.55	0.154	0.754831	0.998	1.06,0.62,1.81	0.826	0.599	1.23,0.94,1.61	0.145	1.26,0.91,1.74	0.168	0.999	NA		0.40	0.0754
sICAM	Ovarian (mucinous, borderline & invasive)	22	0.92,0.81,1.03	0.154	0.754831	0.477	1.08,0.79,1.46	0.637	0.260	0.89,0.69,1.02	0.105	0.89,0.75,1.06	0.191	0.437	NA		0.96	0.1468
GROa	Ovarian (endometrioid, invasive)	11	1.06,0.98,1.14	0.154	0.754831	0.662	1.02,0.91,1.15	0.702	0.425	1.05,0.98,1.13	0.258	1.06,0.97,1.17	0.197	0.690	NA		1.00	0.2724
Eotaxin	Lung (squamous cell)	2	1.29,0.91,1.85	0.155	0.754831	0.433											0.22	0.0056
sICAM	Breast (luminal A)	22	1.02,0.99,1.06	0.156	0.754831	0.520	1.10,1.01,1.19	0.026	0.068	1.05,0.98,1.11	0.228	1.05,1.00,1.09	0.060	0.513	NA		1.00	0.1398
MCP1	Prostate (high vs low+int risk)	24	0.77,0.54,1.10	0.157	0.754831	0.135	0.41,0.24,0.70	0.001	0.004	0.76,0.54,1.04	0.062	0.68,0.43,1.07	0.095	0.194	NA		0.28	0.0041
TNF-A	Lung (small cell)	1	0.56,0.25,1.25	0.158	0.754831												0.08	0.0028
IL-18	Prostate (high vs low+int risk)	5	1.06,0.98,1.15	0.158	0.754831	0.654	1.24,0.96,1.60	0.097	0.200	1.11,0.77,1.26	0.209	1.09,0.99,1.21	0.068	0.548	NA		1.00	0.0506
Eotaxin	Breast (HER2 enriched)	2	1.42,0.87,2.33	0.159	0.754831	0.516											0.30	0.0056
MCP3	Ovarian (endometrioid, invasive)	10	1.06,0.98,1.16	0.159	0.754831	0.898	1.03,0.84,1.25	0.784	0.710	1.07,0.97,1.24	0.178	1.04,0.93,1.16	0.511	0.894	NA		1.00	0.2464
VEGF	Ovarian (serous, MA incl. CIMBA)	21	1.06,0.98,1.14	0.161	0.754831	0.703	1.03,0.91,1.17	0.595	0.676	1.06,0.98,1.14	0.157	1.04,0.95,1.15	0.391	0.744	NA		1.00	0.0725
sICAM	Breast (luminal B)	22	0.95,0.89,1.02	0.161	0.754831	0.565	1.08,0.90,1.29	0.432	0.149	0.87,0.79,0.99	0.050	0.93,0.85,1.03	0.193	0.566	NA		1.00	0.1398
sICAM	Ovarian (serous, invasive LG)	22	0.84,0.66,1.07	0.162	0.755048	0.054	1.51,0.86,2.65	0.153	0.027	0.83,0.54,1.10	0.181	0.93,0.70,1.23	0.595	0.055	NA		0.67	0.1468
MIF	Ovarian (mucinous, invasive)	2	1.35,0.88,2.07	0.164	0.762372	0.320											0.17	0.019
TNF-A	Ovarian (mucinous, borderline)	2	1.94,0.76,4.95	0.167	0.768028	0.951											0.07	0.0044
Eotaxin	Ovarian (serous, invasive LG)	2	1.89,0.76,4.69	0.168	0.768238	0.911											0.08	0.0056
IL-16	Lung (squamous cell)	17	1.11,0.96,1.28	0.169	0.770192	0.366	1.14,0.94,1.38	0.171	0.605	1.14,0.96,1.32	0.163	1.10,0.94,1.29	0.231	0.490	NA		0.84	0.0351
IL-6	Endometrial (endometrioid)	1	0.66,0.37,1.19	0.17	0.770192												0.11	0.0018
IL-8	Breast (triple negative)	1	1.28,0.90,1.81	0.17	0.770192												0.22	0.0045
IL-2ra	Breast (triple negative)	10	0.96,0.91,1.02	0.17	0.770192	0.736	1.00,0.91,1.10	0.985	0.337	0.97,0.85,1.03	0.305	0.98,0.92,1.05	0.575	0.741	NA		1.00	0.1787
PDGFbb	Breast (overall)	1	0.82,0.62,1.09	0.172	0.774812												0.29	0.001
TRAIL	Lung (squamous cell)	38	0.86,0.68,1.07	0.173	0.774812	0.257	0.83,0.55,1.23	0.348	0.836	0.87,0.70,1.10	0.245	0.92,0.69,1.24	0.604	0.286	NA		0.55	0.0175
SeSelectin	Ovarian (overall, invasive)	2	1.20,0.92,1.55	0.174	0.775669	0.225											0.52	0.0079
CTACK	Endometrial (overall)	3	1.10,0.96,1.25	0.175	0.776661	0.130	1.03,0.67,1.61	0.881	0.779	1.12,0.58,1.20	0.065	1.11,1.00,1.23	0.050				1.00	0.0601
IL-2ra	Ovarian (serous, borderline & invasive LG)	11	1.07,0.97,1.18	0.175	0.776661	0.945	1.05,0.88,1.24	0.590	0.744	1.07,0.95,1.48	0.210	1.03,0.91,1.17	0.646	0.938	NA		1.00	0.2326
IP-10	Lung (adenocarcinoma)	4	0.86,0.70,1.07	0.179	0.776661	0.959	0.70,0.31,1.60	0.400	0.610			0.89,0.69,1.14	0.338	0.965	NA		0.57	0.0131
MIP1a	Ovarian (overall, MA incl. CIMBA)	24	0.97,0.93,1.01	0.179	0.776661	0.796	1.02,0.93,1.11	0.744	0.250	0.97,0.91,1.02	0.214	0.99,0.93,1.05	0.692	0.774	NA		1.00	0.1764
SCGFb	Ovarian (serous, invasive HG)	2	1.19,0.92,1.52	0.18	0.776661	0.153											0.68	0.0161
IL-1ra	Breast (HER2 enriched)	18	1.09,0.96,1.25	0.18	0.776661	0.658	0.96,0.73,1.27	0.792	0.308	1.05,0.92,1.22	0.443	1.11,0.94,1.32	0.224	0.710	NA		1.00	0.0754
SCGFb	Lung (never smokers)	2	0.74,0.47,1.15	0.181	0.776661	0.259											0.18	0.0161
IL-8	Ovarian (overall, MA incl. CIMBA)	1	1.20,0.92,1.55	0.182	0.776661												0.42	0.0045
HGF	Endometrial (non-endometrioid)	6	0.67,0.37,1.21	0.183	0.776661	0.747	0.67,0.33,1.37	0.275	0.953			0.66,0.35,1.23	0.193	0.635	NA		0.10	0.0097
MIP1b	Ovarian (mucinous, borderline)	21	0.84,0.65,1.09	0.184	0.776661	0.033	1.13,0.74,1.73	0.562	0.084	0.84,0.64,1.15	0.272	0.86,0.65,1.12	0.260	0.051	NA		0.68	0.1345
activePAI	Ovarian (serous, invasive LG)	1	2.46,0.65,9.35	0.186	0.776661												0.06	0.0031
MIF	Ovarian (mucinous, borderline & invasive)	2	1.25,0.90,1.74	0.186	0.776661	0.302											0.27	0.019
VEGF	Lung (overall)	21	1.04,0.98,1.11	0.186	0.776661	0.749	1.03,0.93,1.15	0.575	0.752	1.06,0.98,1.12	0.130	1.04,0.96,1.13	0.312	0.814	NA		1.00	0.0725
MIP1a	Breast (overall)	24	0.98,0.96,1.01	0.186	0.776661	0.270	1.00,0.95,1.05	0.919	0.525	0.98,0.91,1.02	0.363	0.99,0.96,1.03	0.710	0.291	NA		1.00	0.1764
IL-1ra	Ovarian (clearcell, invasive)	18	1.15,0.93,1.43	0.187	0.776661	0.476	0.97,0.62,1.52	0.897	0.387	1.10,0.81,1.48	0.480	1.07,0.81,1.43	0.621	0.506	NA		0.51	0.0754
MIP1a	Lung (squamous cell)	22	1.05,0.98,1.14	0.187	0.776661	0.437	0.99,0.85,1.14	0.871	0.318	1.01,0.92,1.10	1.000	1.02,0.92,1.12	0.768	0.421	NA		1.00	0.1594
RANTES	Breast (luminal B, HER2 neg.)	1	0.86,0.68,1.08	0.188	0.776661												0.58	0.0091
HGF	Lung (squamous cell)	6	0.84,0.65,1.09	0.192	0.781033	0.386	0.86,0.61,1.22	0.398	0.797			0.84,0.65,1.10	0.207	0.902	NA		0.35	0.0097
SCGFb	Lung (overall)	2	0.90,0.77,1.05	0.192	0.781101	0.242											0.91	0.0161
IL-16	Lung (ever smokers)	17	1.08,0.96,1.22	0.195	0.785499	0.259	1.17,1.01,1.36	0.035	0.098	1.11,0.99,1.25	0.091	1.13,1.00,1.28	0.053	0.246	NA		0.92	0.0351
TNF-A	Ovarian (clearcell, invasive)	2	0.55,0.22,1.37	0.198	0.785499	0.296											0.08	0.0044
MIP1b	Ovarian (serous, invasive LG)	21	0.87,0.70,1.08	0.198	0.785499	0.549	0.94,0.65,1.36	0.754	0.581	0.87,0.65,1.10	0.258	0.86,0.65,1.15	0.304	0.626	NA		0.63	0.1345
sVCAM	Ovarian (serous, invasive LG)	1	2.16,0.67,6.99	0.2	0.785499												0.06	0.003
MCSF	Lung (small cell)	10	0.87,0.71,1.07	0.2	0.785499	0.660	0.92,0.53,1.60	0.767	0.845	0.91,0.64,1.15	0.525	0.93,0.71,1.22	0.606	0.649	NA		0.51	0.0437
IL-7	Lung (small cell)	1	1.50,0.80,2.81	0.201	0.785499												0.10	0.0047
TRAIL	Ovarian Serous (invasive LG & HG)	43	0.89,0.74,1.06	0.201	0.785499	0.268	0.96,0.71,1.31	0.810	0.529	0.87,0.73,1.03	0.111	0.93,0.73,1.19	0.554	0.329	NA		0.75	0.0183
MCSF	Breast (luminal B)	11	0.91,0.79,1.05	0.203	0.785499	0.157	1.21,0.83,1.76	0.318	0.109	0.96,0.56,1.18	0.652	1.02,0.86,1.21	0.823	0.132	NA		1.00	0.0457
activePAI	Ovarian (serous, borderline & invasive LG)	1	1.67,0.76,3.70	0.204	0.785499												0.20	0.0031
MCSF	Ovarian (overall, MA incl. CIMBA)	11	1.06,0.97,1.15	0.204	0.785499	0.340	1.06,0.83,1.36	0.652	0.987	1.10,0.98,1.28	0.100	1.07,0.96,1.20	0.202	0.393	NA		1.00	0.0457
MIF	Breast (overall)	2	0.92,0.81,1.05	0.205	0.785499	0.047											1.00	0.019
MIP1a	Breast (luminal A)	24	0.98,0.94,1.01	0.205	0.785499	0.128	0.98,0.91,1.05	0.571	0.953	0.99,0.96,1.02	0.475	0.99,0.95,1.03	0.476	0.173	NA		1.00	0.1764
IL12p70	Ovarian (serous, invasive LG)	1	2.29,0.63,8.31	0.206	0.785499												0.06	0.0015
TRAIL	Ovarian (mucinous, invasive)	43	1.32,0.86,2.05	0.206	0.785499	0.761	1.47,0.70,3.09	0.303	0.724	1.40,0.91,2.19	0.136	1.43,0.76,2.71	0.268	0.772	NA		0.17	0.0183
sICAM	Endometrial (endometrioid)	22	1.06,0.97,1.15	0.206	0.785499	0.126	1.01,0.81,1.25	0.949	0.644	1.10,0.98,1.20	0.138	1.04,0.94,1.16	0.414	0.101	NA		1.00	0.1468
IL-6	Ovarian (clearcell, invasive)	1	2.33,0.63,8.70	0.207	0.785499												0.06	0.0018
MCSF	Prostate (overall)	11	0.96,0.91,1.02	0.208	0.78568	0.400	1.03,0.88,1.21	0.699	0.370	0.94,0.89,1.01	0.102	0.95,0.89,1.02	0.189	0.453	NA		1.00	0.0457
IL-16	Lung (adenocarcinoma)	16	1.09,0.95,1.25	0.21	0.789234	0.199	1.17,0.99,1.39	0.071	0.199	1.14,1.00,1.27	0.052	1.13,0.99,1.30	0.077	0.262	NA		0.94	0.0346
SeSelectin	Ovarian (serous, MA incl. CIMBA)	2	1.15,0.93,1.42	0.211	0.790457	0.448											0.52	0.0079
SCGFb	Ovarian (clearcell, invasive)	2	1.38,0.83,2.30	0.213	0.795589	0.253											0.15	0.0161
TRAIL	Breast (triple negative)	43	0.89,0.73,1.07	0.216	0.804784	0.078	0.68,0.50,0.93	0.015	0.039	1.00,0.79,1.44	1.000	0.86,0.66,1.11	0.247	0.082	NA		0.66	0.0183
RANTES	Lung (ever smokers)	1	1.15,0.92,1.44	0.217	0.805119												0.40	0.0091
SCGFb	Ovarian (mucinous, borderline)	2	1.51,0.78,2.91	0.218	0.806655	0.177											0.13	0.0161
MCSF	Ovarian (clearcell, invasive)	11	1.19,0.90,1.57	0.22	0.809726	0.960	0.81,0.38,1.72	0.579	0.283	1.18,0.87,2.38	0.220	1.16,0.81,1.65	0.419	0.969	NA		0.34	0.0457
MCP1	Ovarian Serous (invasive LG & HG)	25	1.31,0.85,2.01	0.222	0.811037	0.052	1.24,0.57,2.67	0.586	0.865	1.45,0.92,2.56	0.100	1.42,0.84,2.41	0.189	0.080	NA		0.25	0.0043
IL-7	Endometrial (endometrioid)	1	0.79,0.54,1.16	0.222	0.811037												0.21	0.0047
MIP1a	Lung (small cell)	22	0.93,0.82,1.05	0.223	0.811037	0.446	0.84,0.67,1.05	0.135	0.323	0.90,0.74,1.25	0.156	0.86,0.73,1.01	0.060	0.366	NA		0.96	0.155
IL-18	Lung (squamous cell)	5	0.93,0.83,1.04	0.224	0.811037	0.997	0.99,0.69,1.43	0.954	0.733	0.93,0.64,1.30	0.224	0.93,0.81,1.06	0.281	0.994	NA		0.95	0.0506
TRAIL	Prostate (overall)	38	0.93,0.82,1.05	0.225	0.811037	0.002	0.85,0.69,1.05	0.126	0.309	0.90,0.82,1.01	0.072	0.94,0.83,1.07	0.360	0.002	1 outlier(s)	0.91,0.82,1.02	0.99	0.0178
VEGF	Lung (adenocarcinoma)	21	1.06,0.97,1.16	0.225	0.811037	0.902	1.06,0.91,1.22	0.467	0.983	1.08,0.97,1.23	0.156	1.04,0.93,1.16	0.510	0.919	NA		1.00	0.0725
TNF-A	Prostate (advanced)	2	0.80,0.56,1.15	0.226	0.811037	0.223											0.29	0.0044
RANTES	Breast (luminal B)	1	0.85,0.65,1.11	0.229	0.811037												0.58	0.0091
TRAIL	Ovarian (mucinous, borderline & invasive)	43	1.22,0.88,1.70	0.232	0.811037	0.858	1.11,0.64,1.95	0.705	0.689	1.25,0.88,1.74	0.214	1.32,0.83,2.10	0.236	0.881	NA		0.26	0.0183
IL-1ra	Breast (overall)	18	1.02,0.99,1.05	0.233	0.811037	0.826	1.03,0.96,1.10	0.396	0.747	1.02,0.99,1.05	0.241	1.02,0.98,1.06	0.274	0.873	NA		1.00	0.0754
RANTES	Prostate (advanced)	1	1.14,0.92,1.40	0.234	0.811037												0.52	0.0091
MIP1b	Prostate (advanced)	20	0.96,0.90,1.03	0.234	0.811037	0.779	1.00,0.89,1.11	0.934	0.442	0.98,0.89,1.06	0.572	1.00,0.92,1.08	0.935	0.738	NA		1.00	0.1311
MIP1b	Breast (overall)	21	0.98,0.96,1.01	0.234	0.811037	0.414	0.99,0.95,1.04	0.803	0.586	0.98,0.95,1.01	0.170	0.98,0.94,1.02	0.287	0.488	NA		1.00	0.1345
MIP1a	Ovarian Serous (invasive LG & HG)	24	0.97,0.91,1.02	0.234	0.811037	0.947	0.95,0.84,1.07	0.374	0.732	0.96,0.89,1.03	0.278	0.98,0.90,1.06	0.640	0.959	NA		1.00	0.1764
IL-2ra	Prostate (high vs low risk)	11	0.95,0.88,1.03	0.235	0.811037	0.238	1.01,0.88,1.16	0.869	0.290	0.97,0.78,1.08	0.373	1.00,0.91,1.11	0.958	0.228	NA		1.00	0.2326
sVCAM	Ovarian (mucinous, borderline & invasive)	1	0.65,0.32,1.33	0.237	0.811037												0.08	0.003
HGF	Prostate (overall)	6	1.07,0.96,1.20	0.237	0.811037	0.554	1.09,0.96,1.25	0.192	0.571			1.07,0.95,1.21	0.236	0.279	NA		0.91	0.0097
SCGFb	Prostate (advanced)	2	1.10,0.94,1.27	0.239	0.811037	0.687											0.76	0.0161
Eotaxin	Prostate (high vs low+int risk)	2	0.82,0.59,1.14	0.242	0.811037	0.194											0.37	0.0056
CTACK	Breast (overall)	3	0.98,0.94,1.01	0.243	0.811037	0.557	0.95,0.87,1.04	0.234	0.433	0.97,0.83,1.09	0.242	0.98,0.94,1.02	0.259				1.00	0.0601
IP-10	Breast (HER2 enriched)	4	0.82,0.58,1.15	0.244	0.811037	0.497	0.60,0.16,2.26	0.447	0.630			0.89,0.60,1.34	0.587	0.532	NA		0.59	0.0131
MCP1	Ovarian (overall, invasive)	25	1.24,0.86,1.79	0.245	0.811037	0.067	1.19,0.62,2.29	0.603	0.872	1.36,0.90,1.88	0.132	1.24,0.80,1.94	0.332	0.108	NA		0.32	0.0043
IL-16	Ovarian (serous, borderline & invasive LG)	17	0.88,0.72,1.09	0.246	0.811037	0.877	0.96,0.74,1.26	0.784	0.322	0.92,0.73,1.13	0.413	0.90,0.71,1.14	0.392	0.915	NA		0.96	0.0351
IL-8	Ovarian (serous, invasive LG)	1	0.54,0.19,1.53	0.247	0.811037												0.07	0.0045
SeSelectin	Lung (ever smokers)	2	1.15,0.91,1.46	0.248	0.811037	0.692											0.35	0.0079
TRAIL	Breast (HER2 enriched)	43	0.85,0.64,1.12	0.248	0.811037	0.867	0.96,0.60,1.55	0.880	0.508	0.87,0.65,1.13	0.302	0.81,0.54,1.24	0.333	0.856	NA		0.74	0.0183
MIF	Breast (luminal B, HER2 neg.)	2	0.91,0.77,1.07	0.248	0.811037	0.717											0.88	0.019
IL-16	Ovarian (mucinous, borderline & invasive)	17	1.14,0.91,1.42	0.248	0.811037	0.622	1.14,0.86,1.51	0.371	0.999	1.20,0.87,2.43	0.266	1.12,0.86,1.46	0.391	0.550	NA		0.44	0.0351
MIG	Ovarian (mucinous, invasive)	1	1.38,0.80,2.38	0.249	0.811037												0.12	0.0111
Eotaxin	Ovarian (overall, MA incl. CIMBA)	2	0.88,0.70,1.10	0.25	0.811037	0.325											0.50	0.0056
MCP3	Breast (HER2 enriched)	10	1.05,0.97,1.13	0.25	0.811037	0.388	1.09,0.90,1.32	0.395	0.677	1.06,0.95,1.14	0.290	1.03,0.93,1.14	0.540	0.495	NA		1.00	0.2464
IL12p70	Lung (squamous cell)	1	0.73,0.42,1.25	0.251	0.811037												0.10	0.0015
SCF	Lung (overall)	2	1.19,0.89,1.59	0.251	0.811037	0.562											0.34	0.0036
MIP1b	Prostate (overall)	20	1.02,0.98,1.06	0.251	0.811037	0.696	1.08,1.01,1.15	0.023	0.047	1.04,1.00,1.07	0.050	1.04,0.99,1.09	0.110	0.689	NA		1.00	0.1311
MIP1a	Breast (luminal B)	24	0.96,0.89,1.03	0.251	0.811037	0.326	1.02,0.88,1.17	0.816	0.354	0.95,0.80,1.05	0.295	1.00,0.91,1.10	0.977	0.288	NA		1.00	0.1764
sVCAM	Breast (overall)	1	0.92,0.80,1.06	0.252	0.811037												0.69	0.003
MCP1	Breast (triple negative)	25	1.23,0.86,1.75	0.252	0.811037	0.615	1.15,0.63,2.11	0.649	0.796	1.26,0.85,1.78	0.251	1.22,0.74,2.02	0.436	0.690	NA		0.21	0.0043
PDGFbb	Ovarian (borderline)	1	2.15,0.58,7.96	0.253	0.811037												0.06	0.001
MCP1	Ovarian (borderline)	25	0.68,0.35,1.32	0.253	0.811037	0.400	2.70,0.87,8.40	0.086	0.004	0.68,0.36,1.30	0.245	0.98,0.40,2.40	0.961	0.377	NA		0.11	0.0043
SeSelectin	Ovarian (serous, borderline)	2	0.72,0.41,1.27	0.255	0.811037	0.999											0.12	0.0079
IL-16	Endometrial (endometrioid)	17	0.93,0.82,1.06	0.255	0.811037	0.822	0.96,0.81,1.13	0.643	0.503	0.94,0.84,1.07	0.399	0.94,0.81,1.09	0.395	0.864	NA		0.88	0.0351
SCF	Lung (never smokers)	2	0.53,0.18,1.59	0.256	0.811037	0.204											0.08	0.0036
MIF	Ovarian (clearcell, invasive)	2	1.28,0.84,1.97	0.256	0.811037	0.452											0.17	0.019
VEGF	Breast (HER2 enriched)	21	1.10,0.94,1.28	0.256	0.811037	0.383	0.99,0.77,1.29	0.961	0.347	1.10,0.93,1.30	0.278	1.06,0.87,1.29	0.563	0.466	NA		1.00	0.0725
sICAM	Breast (luminal B, HER2 neg.)	22	0.96,0.89,1.03	0.256	0.811037	0.045	1.03,0.84,1.25	0.796	0.453	0.98,0.83,1.09	0.591	0.97,0.88,1.06	0.494	0.040	No significant outliers		1.00	0.1398
IL-2ra	Lung (ever smokers)	11	0.97,0.92,1.02	0.256	0.811037	0.890	1.01,0.92,1.10	0.843	0.273	0.98,0.84,1.03	0.420	0.99,0.93,1.06	0.819	0.828	NA		1.00	0.2326
MIG	Ovarian (serous, borderline & invasive LG)	1	1.26,0.85,1.87	0.257	0.811037												0.56	0.0111
IL-16	Ovarian (serous, MA incl. CIMBA)	17	1.06,0.96,1.17	0.257	0.811037	0.404	1.04,0.92,1.19	0.521	0.739	1.01,0.91,1.59	0.789	1.03,0.92,1.16	0.635	0.180	NA		0.99	0.0351
SCF	Ovarian (serous, borderline & invasive LG)	2	1.64,0.70,3.86	0.258	0.811037	0.216											0.22	0.0036
GROa	Breast (HER2 enriched)	11	1.04,0.97,1.11	0.258	0.811037	0.866	0.98,0.89,1.09	0.752	0.141	1.04,0.94,1.15	0.321	1.04,0.96,1.13	0.353	0.775	NA		1.00	0.2724
sVCAM	Prostate (high vs low+int risk)	1	0.84,0.61,1.14	0.26	0.811037												0.22	0.003
IP-10	Ovarian Serous (invasive LG & HG)	4	1.12,0.92,1.37	0.261	0.811037	0.555	1.24,0.59,2.61	0.569	0.779			1.15,0.90,1.45	0.260	0.584	NA		0.61	0.0131
GROa	Prostate (high vs low+int risk)	11	0.98,0.95,1.02	0.261	0.811037	0.940	0.96,0.91,1.01	0.122	0.287	0.98,0.95,1.01	0.206	0.97,0.93,1.02	0.221	0.953	NA		1.00	0.2724
MCP1	Ovarian (serous, invasive HG)	25	1.29,0.83,2.02	0.262	0.811037	0.043	1.18,0.53,2.63	0.682	0.789	1.45,0.99,2.14	0.036	1.43,0.83,2.49	0.201	0.056	NA		0.24	0.0043
MIP1b	Breast (luminal B, HER2 neg.)	21	1.04,0.97,1.11	0.262	0.811037	0.946	1.03,0.92,1.16	0.613	0.848	1.04,0.96,1.12	0.432	1.03,0.94,1.13	0.463	0.959	NA		1.00	0.1345
MIG	Ovarian (serous, borderline)	1	1.32,0.81,2.13	0.263	0.811037												0.15	0.0111
IL-2ra	Ovarian (serous, invasive HG)	11	0.97,0.92,1.02	0.263	0.811037	1.000	0.99,0.90,1.09	0.830	0.579	0.97,0.67,1.38	0.267	0.98,0.91,1.05	0.540	1.000	NA		1.00	0.2326
GROa	Lung (overall)	10	1.03,0.98,1.07	0.264	0.811037	0.033	1.02,0.95,1.10	0.516	0.944	1.03,1.00,1.06	0.090	1.03,0.99,1.07	0.144	0.110	NA		1.00	0.2679
IL12p70	Endometrial (overall)	1	1.27,0.84,1.93	0.265	0.811037												0.13	0.0015
HGF	Breast (triple negative)	6	0.87,0.68,1.11	0.265	0.811037	0.207	0.78,0.60,1.02	0.072	0.154	1.06,1.06,1.24	1.000	0.86,0.69,1.07	0.179	0.185	NA		0.41	0.0097
activePAI	Ovarian (serous, MA incl. CIMBA)	1	0.82,0.57,1.17	0.266	0.811037												0.24	0.0031
Eotaxin	Ovarian (clearcell, invasive)	2	0.65,0.31,1.39	0.266	0.81134	0.533											0.08	0.0056
IL-6	Breast (luminal B)	1	1.38,0.78,2.46	0.271	0.818483												0.16	0.0018
PDGFbb	Lung (overall)	1	0.74,0.43,1.27	0.272	0.818947												0.13	0.001
MCSF	Endometrial (non-endometrioid)	11	0.84,0.62,1.14	0.274	0.82251	0.411	2.08,0.90,4.77	0.086	0.023	0.56,0.26,1.27	0.211	0.89,0.60,1.32	0.566	0.419	NA		0.31	0.0457
IP-10	Ovarian (clearcell, invasive)	4	0.75,0.45,1.26	0.276	0.823295	0.595	2.52,0.36,17.54	0.350	0.203			0.70,0.38,1.30	0.261	0.638	NA		0.13	0.0131
GROa	Endometrial (endometrioid)	11	1.03,0.98,1.09	0.276	0.823295	0.227	1.08,1.01,1.16	0.036	0.079	1.04,0.98,1.09	0.207	1.04,0.98,1.10	0.199	0.351	NA		1.00	0.2724
IL-8	Breast (luminal A)	1	0.91,0.76,1.08	0.278	0.825799												0.67	0.0045
TRAIL	Prostate (advanced)	38	0.91,0.77,1.08	0.282	0.832221	0.225	0.81,0.60,1.08	0.149	0.314	0.86,0.69,1.01	0.057	0.88,0.69,1.11	0.288	0.223	NA		0.81	0.0178
sVCAM	Breast (luminal A)	1	0.90,0.74,1.09	0.283	0.832221												0.50	0.003
CTACK	Prostate (high vs low+int risk)	3	0.96,0.89,1.04	0.284	0.834043	0.747	1.02,0.84,1.23	0.845	0.489	0.96,0.71,1.29	0.305	0.97,0.89,1.05	0.463				1.00	0.0601
IL12p70	Prostate (advanced)	1	0.81,0.55,1.19	0.285	0.834043												0.13	0.0015
IL-7	Breast (luminal A)	1	0.91,0.77,1.08	0.286	0.834043												0.69	0.0047
MIG	Prostate (high vs low+int risk)	1	0.91,0.76,1.08	0.286	0.834043												0.63	0.0111
IP-10	Breast (overall)	4	1.05,0.96,1.15	0.286	0.834043	0.294	0.85,0.63,1.15	0.284	0.151			1.09,0.99,1.20	0.090	0.342	NA		1.00	0.0131
IL12p70	Breast (luminal A)	1	1.13,0.90,1.41	0.287	0.834043												0.29	0.0015
IL12p70	Ovarian (mucinous, invasive)	1	0.56,0.19,1.64	0.287	0.834043												0.06	0.0015
IP-10	Endometrial (non-endometrioid)	4	0.62,0.26,1.49	0.287	0.834043	0.069	6.41,0.67,61.60	0.108	0.036			0.78,0.37,1.68	0.531	0.082	NA		0.12	0.0131
TNF-A	Ovarian (serous, invasive HG)	2	1.26,0.82,1.92	0.289	0.836442	0.202											0.24	0.0044
IL-1ra	Breast (triple negative)	18	1.05,0.96,1.16	0.29	0.836442	0.101	0.83,0.71,0.98	0.032	0.002	1.03,0.95,1.15	0.451	1.05,0.94,1.17	0.362	0.098	NA		1.00	0.0754
MIP1a	Ovarian (serous, MA incl. CIMBA)	24	0.97,0.93,1.02	0.29	0.836442	0.890	0.97,0.88,1.08	0.601	0.996	0.96,0.91,1.02	0.240	0.99,0.93,1.06	0.845	0.902	NA		1.00	0.1764
IP-10	Ovarian (mucinous, borderline)	4	0.73,0.41,1.31	0.292	0.836442	0.657	1.17,0.13,10.27	0.886	0.660			0.74,0.37,1.46	0.380	0.686	NA		0.12	0.0131
IL-2ra	Ovarian Serous (invasive LG & HG)	11	0.97,0.92,1.02	0.293	0.836442	0.998	1.00,0.92,1.10	0.951	0.397	0.97,0.82,1.03	0.293	0.99,0.92,1.06	0.696	0.994	NA		1.00	0.2326
IP-10	Prostate (high vs low+int risk)	4	0.91,0.77,1.08	0.294	0.836442	0.582	1.32,0.69,2.53	0.403	0.249			0.93,0.76,1.13	0.457	0.593	NA		0.70	0.0131
HGF	Lung (adenocarcinoma)	6	1.12,0.90,1.40	0.297	0.837706	0.818	1.03,0.80,1.34	0.803	0.248			1.12,0.89,1.40	0.339	0.193	NA		0.46	0.0097
MIP1a	Prostate (high vs low+int risk)	23	1.03,0.98,1.08	0.297	0.837706	0.602	1.04,0.94,1.15	0.410	0.727	1.01,0.94,1.09	0.789	1.03,0.97,1.11	0.328	0.689	NA		1.00	0.1724
MIF	Endometrial (non-endometrioid)	2	0.78,0.49,1.25	0.298	0.837706	0.877											0.16	0.019
MCSF	Breast (luminal A)	11	0.97,0.92,1.03	0.299	0.837706	0.618	0.88,0.75,1.02	0.096	0.166	0.97,0.88,1.05	0.492	0.97,0.90,1.04	0.401	0.689	NA		1.00	0.0457
IL-2ra	Prostate (high vs low+int risk)	11	0.97,0.93,1.02	0.3	0.839073	0.298	1.00,0.92,1.09	0.992	0.458	0.97,0.87,1.05	0.403	0.98,0.92,1.04	0.433	0.281	NA		1.00	0.2326
MCP3	Ovarian (serous, borderline)	10	1.06,0.95,1.17	0.301	0.839073	0.563	0.97,0.77,1.24	0.829	0.461	1.03,0.91,1.42	0.538	1.01,0.88,1.15	0.924	0.582	NA		0.99	0.2464
IL-8	Ovarian (serous, invasive HG)	1	1.21,0.85,1.72	0.303	0.839115												0.25	0.0045
IL-6	Ovarian (endometrioid, invasive)	1	1.64,0.64,4.19	0.304	0.839115												0.07	0.0018
MCP1	Ovarian (endometrioid, invasive)	25	1.43,0.72,2.83	0.304	0.839115	0.354	1.72,0.51,5.78	0.384	0.721	1.52,0.79,2.92	0.212	1.21,0.48,3.04	0.680	0.390	NA		0.10	0.0043
IL-6	Breast (luminal A)	1	1.14,0.88,1.48	0.305	0.839115												0.33	0.0018
TNF-A	Lung (never smokers)	1	0.63,0.26,1.53	0.305	0.839115												0.07	0.0028
sVCAM	Prostate (overall)	1	0.90,0.75,1.10	0.307	0.839115												0.45	0.003
IP-10	Lung (squamous cell)	4	1.14,0.89,1.46	0.308	0.839115	0.594	1.30,0.50,3.37	0.587	0.774			1.10,0.82,1.48	0.533	0.630	NA		0.44	0.0131
sICAM	Lung (overall)	22	0.97,0.92,1.03	0.308	0.839115	0.161	0.98,0.86,1.13	0.791	0.887	0.91,0.87,0.97	0.016	0.96,0.89,1.02	0.196	0.162	NA		1.00	0.1468
VEGF	Ovarian (endometrioid, invasive)	21	0.92,0.78,1.08	0.309	0.839115	0.544	0.69,0.53,0.91	0.008	0.011	0.85,0.69,1.96	0.203	0.83,0.67,1.02	0.076	0.418	NA		0.78	0.0725
SCF	Endometrial (non-endometrioid)	2	1.85,0.56,6.08	0.31	0.839115	0.259											0.07	0.0036
MIG	Ovarian (mucinous, borderline)	1	1.37,0.74,2.53	0.31	0.839115												0.11	0.0111
IP-10	Ovarian (borderline)	4	0.83,0.57,1.19	0.31	0.839115	0.626	0.90,0.22,3.61	0.881	0.901			0.86,0.55,1.34	0.504	0.634	NA		0.23	0.0131
VEGF	Ovarian (borderline)	21	0.90,0.74,1.10	0.31	0.839115	0.099	0.85,0.61,1.18	0.323	0.632	0.89,0.71,1.19	0.423	0.96,0.78,1.19	0.730	0.117	NA		0.81	0.0725
MIF	Ovarian (mucinous, borderline)	2	1.27,0.80,2.03	0.315	0.843815	0.670											0.15	0.019
MIF	Ovarian Serous (invasive LG & HG)	2	0.92,0.78,1.09	0.315	0.843815	0.305											0.77	0.019
TNF-A	Endometrial (non-endometrioid)	2	0.60,0.22,1.62	0.316	0.843815	0.579											0.07	0.0044
activePAI	Prostate (high vs low risk)	1	0.75,0.43,1.31	0.317	0.843815												0.12	0.0031
IP-10	Ovarian (serous, invasive HG)	4	1.11,0.90,1.36	0.318	0.844113	0.656	1.11,0.52,2.39	0.781	0.990			1.16,0.91,1.48	0.227	0.651	NA		0.59	0.0131
IL-16	Breast (overall)	17	1.03,0.97,1.09	0.323	0.850163	0.049	1.00,0.93,1.08	0.906	0.313	1.01,0.89,1.07	0.686	1.02,0.97,1.08	0.446	0.127	NA		1.00	0.0351
TNF-A	Ovarian Serous (invasive LG & HG)	2	1.23,0.82,1.84	0.324	0.850163	0.208											0.25	0.0044
Eotaxin	Lung (never smokers)	2	1.39,0.72,2.68	0.324	0.850163	0.587											0.09	0.0056
SCGFb	Lung (adenocarcinoma)	2	0.88,0.68,1.13	0.324	0.850163	0.165											0.66	0.0161
IL-2ra	Ovarian (serous, MA incl. CIMBA)	11	0.98,0.93,1.02	0.324	0.850163	0.956	1.01,0.93,1.08	0.894	0.373	0.98,0.92,1.03	0.566	0.99,0.93,1.05	0.699	0.953	NA		1.00	0.2326
PDGFbb	Ovarian (mucinous, borderline)	1	2.79,0.36,21.56	0.325	0.850163												0.06	0.001
activePAI	Breast (overall)	1	1.09,0.92,1.29	0.327	0.850163												0.71	0.0031
RANTES	Ovarian (mucinous, borderline)	1	0.72,0.37,1.40	0.329	0.850163												0.10	0.0091
GROa	Ovarian (serous, invasive LG)	11	1.07,0.93,1.23	0.329	0.850163	0.342	1.04,0.84,1.29	0.711	0.720	1.06,0.93,1.21	0.410	1.06,0.91,1.23	0.481	0.469	NA		0.90	0.2724
SCGFb	Ovarian Serous (invasive LG & HG)	2	1.16,0.86,1.55	0.33	0.850163	0.084											0.70	0.0161
MCP3	Lung (never smokers)	8	0.95,0.85,1.06	0.33	0.850163	0.789	0.97,0.73,1.29	0.834	0.855	0.97,0.81,1.09	0.493	0.96,0.84,1.10	0.599	0.837	NA		0.96	0.2114
IL-6	Ovarian (serous, invasive LG)	1	2.17,0.45,10.39	0.331	0.850163												0.06	0.0018
activePAI	Ovarian (serous, invasive HG)	1	0.81,0.53,1.24	0.331	0.850163												0.19	0.0031
sVCAM	Ovarian (endometrioid, invasive)	1	0.71,0.36,1.41	0.332	0.851752												0.09	0.003
SeSelectin	Prostate (high vs low+int risk)	2	0.90,0.73,1.11	0.334	0.8532	0.340											0.49	0.0079
SeSelectin	Prostate (high vs low risk)	2	0.85,0.60,1.19	0.335	0.8532	0.295											0.23	0.0079
Eotaxin	Breast (luminal B, HER2 neg.)	2	1.15,0.86,1.54	0.336	0.8532	0.593											0.40	0.0056
MIF	Breast (triple negative)	2	0.92,0.78,1.09	0.338	0.8532	0.913											0.67	0.019
RANTES	Prostate (overall)	1	1.06,0.94,1.20	0.339	0.854724												0.89	0.0091
SCGFb	Ovarian (overall, invasive)	2	1.16,0.85,1.58	0.34	0.854724	0.037											0.82	0.0161
MIF	Lung (squamous cell)	2	1.25,0.79,1.96	0.341	0.854724	0.031											0.59	0.019
MIP1a	Prostate (high vs low risk)	23	0.96,0.89,1.04	0.348	0.860973	0.625	0.99,0.85,1.15	0.872	0.724	0.96,0.88,1.07	0.488	0.99,0.89,1.09	0.781	0.693	NA		1.00	0.1724
PDGFbb	Ovarian (serous, MA incl. CIMBA)	1	0.75,0.41,1.37	0.35	0.860973												0.11	0.001
MIG	Lung (ever smokers)	1	1.10,0.90,1.36	0.35	0.860973												0.47	0.0111
MIG	Lung (small cell)	1	1.22,0.81,1.84	0.35	0.860973												0.17	0.0111
Eotaxin	Endometrial (non-endometrioid)	2	1.53,0.62,3.77	0.352	0.860973	0.307											0.08	0.0056
MIF	Prostate (high vs low risk)	2	1.11,0.89,1.38	0.352	0.860973	0.960											0.48	0.019
VEGF	Breast (luminal B)	21	1.05,0.95,1.17	0.353	0.860973	0.832	1.05,0.89,1.25	0.566	0.996	1.04,0.92,1.43	0.490	1.01,0.89,1.16	0.838	0.823	NA		1.00	0.0725
MCP1	Endometrial (overall)	24	1.19,0.82,1.73	0.357	0.862338	0.307	0.96,0.50,1.86	0.915	0.446	1.19,0.84,1.68	0.332	1.06,0.65,1.73	0.814	0.342	NA		0.28	0.0043
RANTES	Ovarian (mucinous, borderline & invasive)	1	0.81,0.51,1.28	0.357	0.862338												0.15	0.0091
MCP3	Endometrial (non-endometrioid)	9	0.94,0.81,1.08	0.357	0.862338	0.505	1.07,0.74,1.55	0.724	0.443	0.96,0.83,1.12	0.660	0.96,0.80,1.15	0.651	0.519	NA		0.92	0.2386
MCP1	Breast (luminal B)	25	0.82,0.54,1.25	0.358	0.862338	0.345	0.73,0.35,1.53	0.410	0.713	0.72,0.48,1.17	0.208	0.77,0.44,1.37	0.377	0.404	NA		0.32	0.0043
SeSelectin	Ovarian (serous, invasive HG)	2	1.19,0.82,1.72	0.358	0.862338	0.148											0.39	0.0079
IL-2ra	Endometrial (non-endometrioid)	10	0.93,0.79,1.09	0.358	0.862338	0.351	1.06,0.80,1.40	0.698	0.257	0.76,0.44,1.30	0.296	1.06,0.85,1.32	0.605	0.256	NA		0.83	0.1787
activePAI	Ovarian (mucinous, invasive)	1	0.61,0.21,1.76	0.359	0.862338												0.07	0.0031
IL-16	Breast (luminal B, HER2 neg.)	17	0.95,0.85,1.06	0.359	0.862338	0.500	0.88,0.76,1.02	0.084	0.108	0.94,0.84,1.13	0.325	0.92,0.80,1.04	0.186	0.414	NA		0.99	0.0351
IL-7	Ovarian (mucinous, borderline & invasive)	1	0.74,0.39,1.41	0.36	0.862338												0.10	0.0047
MIP1a	Ovarian (mucinous, borderline)	24	1.10,0.89,1.36	0.36	0.862338	0.053	0.99,0.64,1.51	0.948	0.553	1.02,0.59,1.20	0.845	1.05,0.83,1.33	0.666	0.073	NA		0.80	0.1764
IL-7	Lung (ever smokers)	1	0.86,0.63,1.18	0.361	0.862338												0.23	0.0047
SCF	Ovarian (mucinous, borderline)	2	0.41,0.06,2.83	0.367	0.870052	0.079											0.07	0.0036
SeSelectin	Ovarian Serous (invasive LG & HG)	2	1.18,0.82,1.69	0.368	0.870052	0.148											0.41	0.0079
IL-2ra	Breast (luminal B)	10	0.97,0.91,1.03	0.369	0.872017	0.479	0.98,0.88,1.10	0.772	0.785	0.97,0.86,1.04	0.470	0.97,0.90,1.06	0.521	0.580	NA		1.00	0.1787
MIG	Ovarian (serous, invasive HG)	1	0.91,0.73,1.12	0.37	0.872017												0.52	0.0111
MCSF	Ovarian (serous, MA incl. CIMBA)	11	1.04,0.95,1.15	0.371	0.872017	0.367	1.13,0.86,1.47	0.379	0.544	1.08,0.84,1.28	0.222	1.06,0.94,1.20	0.358	0.400	NA		1.00	0.0457
VEGF	Ovarian Serous (invasive LG & HG)	21	1.04,0.95,1.14	0.371	0.872017	0.491	0.99,0.86,1.14	0.887	0.381	1.03,0.93,1.15	0.492	1.02,0.91,1.14	0.766	0.559	NA		1.00	0.0725
Eotaxin	Lung (small cell)	2	1.29,0.74,2.26	0.376	0.876053	0.523											0.11	0.0056
MIP1a	Ovarian (serous, borderline & invasive LG)	24	1.05,0.94,1.17	0.376	0.876053	0.720	1.03,0.83,1.29	0.788	0.844	1.06,0.92,1.30	0.496	1.00,0.86,1.17	0.968	0.711	NA		1.00	0.1764
IL-2ra	Endometrial (endometrioid)	10	1.03,0.97,1.10	0.376	0.876053	0.788	1.01,0.91,1.13	0.840	0.701	1.04,0.95,1.22	0.497	1.02,0.94,1.11	0.607	0.832	NA		1.00	0.1787
SCF	Breast (luminal A)	2	1.09,0.90,1.33	0.379	0.876752	0.899											0.57	0.0036
MIG	Breast (luminal B)	1	0.90,0.71,1.14	0.379	0.876752												0.67	0.0111
IL12p70	Breast (overall)	1	1.08,0.91,1.28	0.38	0.877183												0.42	0.0015
IP-10	Lung (never smokers)	4	0.82,0.53,1.27	0.381	0.877312	0.777	1.05,0.31,3.55	0.931	0.669			0.81,0.49,1.35	0.424	0.793	NA		0.18	0.0163
Eotaxin	Prostate (advanced)	2	0.85,0.58,1.23	0.383	0.880013	0.162											0.35	0.0056
CTACK	Ovarian (endometrioid, invasive)	3	1.08,0.91,1.29	0.383	0.880013	0.707	0.95,0.62,1.46	0.827	0.530	1.08,0.70,2.74	0.383	1.07,0.89,1.28	0.492				0.70	0.0601
MCP1	Breast (overall)	25	1.07,0.92,1.23	0.384	0.880013	0.423	1.09,0.85,1.41	0.502	0.823	1.08,0.93,1.25	0.294	1.14,0.93,1.40	0.208	0.411	NA		0.84	0.0043
activePAI	Lung (small cell)	1	1.42,0.64,3.16	0.386	0.882773												0.08	0.0031
SCGFb	Breast (triple negative)	2	1.08,0.91,1.28	0.387	0.882773	0.613											0.60	0.0161
sVCAM	Prostate (high vs low risk)	1	0.81,0.49,1.32	0.388	0.882773												0.12	0.003
MIF	Breast (luminal A)	2	0.94,0.82,1.08	0.388	0.882773	0.104											1.00	0.019
IP-10	Breast (luminal B, HER2 neg.)	4	1.09,0.90,1.33	0.389	0.882773	0.662	0.81,0.39,1.71	0.584	0.422			1.14,0.91,1.44	0.252	0.707	NA		0.74	0.0131
TRAIL	Ovarian (serous, MA incl. CIMBA)	43	0.94,0.81,1.09	0.389	0.882773	0.345	0.95,0.74,1.23	0.713	0.869	0.94,0.80,1.10	0.466	1.00,0.81,1.23	0.995	0.388	NA		0.86	0.0183
MCP1	Lung (squamous cell)	16	1.25,0.75,2.08	0.39	0.882773	0.779	1.64,0.67,3.97	0.277	0.469	1.37,0.14,2.55	0.253	1.51,0.78,2.90	0.217	0.456	NA		0.14	0.0031
HGF	Ovarian (borderline)	6	1.19,0.80,1.76	0.392	0.884842	0.835	1.39,0.88,2.22	0.159	0.197			1.20,0.80,1.80	0.382	0.288	NA		0.18	0.0097
MIF	Ovarian (overall, invasive)	2	0.94,0.82,1.08	0.393	0.884885	0.767											0.88	0.019
Eotaxin	Breast (triple negative)	2	1.14,0.84,1.54	0.394	0.885389	0.308											0.26	0.0056
RANTES	Lung (small cell)	1	1.21,0.78,1.90	0.394	0.885389												0.15	0.0091
IL12p70	Ovarian (serous, invasive HG)	1	0.83,0.54,1.27	0.395	0.885558												0.12	0.0015
MCSF	Ovarian (serous, invasive HG)	11	0.95,0.86,1.06	0.397	0.885676	0.867	1.08,0.80,1.46	0.609	0.380	0.95,0.67,1.14	0.602	0.99,0.86,1.14	0.916	0.864	NA		0.98	0.0457
sICAM	Breast (triple negative)	22	0.97,0.91,1.04	0.397	0.885676	0.429	0.98,0.83,1.16	0.846	0.893	0.93,0.84,1.05	0.221	0.97,0.88,1.05	0.432	0.440	NA		1.00	0.1398
sICAM	Lung (small cell)	21	0.95,0.84,1.07	0.397	0.885676	0.609	0.96,0.71,1.30	0.800	0.925	1.00,0.87,1.16	0.959	0.96,0.82,1.13	0.649	0.642	NA		0.95	0.1434
MIP1b	Lung (ever smokers)	19	1.04,0.95,1.13	0.398	0.885676	0.108	1.01,0.88,1.16	0.861	0.677	1.02,0.94,1.23	0.735	1.02,0.93,1.11	0.680	0.137	NA		1.00	0.1254
PDGFbb	Endometrial (endometrioid)	1	1.43,0.62,3.29	0.399	0.885676												0.08	0.001
activePAI	Prostate (advanced)	1	0.85,0.58,1.24	0.401	0.885676												0.22	0.0031
SCF	Ovarian (clearcell, invasive)	2	1.50,0.58,3.90	0.402	0.885676	0.779											0.07	0.0036
GROa	Ovarian (borderline)	11	1.04,0.95,1.13	0.403	0.885676	0.241	1.04,0.91,1.19	0.561	0.953	1.04,0.76,1.47	0.359	1.03,0.93,1.15	0.521	0.118	NA		1.00	0.2724
HGF	Ovarian (serous, borderline & invasive LG)	6	1.21,0.78,1.88	0.405	0.885676	0.297	1.28,0.72,2.27	0.409	0.725			1.21,0.80,1.84	0.370	0.805	NA		0.50	0.0097
VEGF	Ovarian (serous, invasive LG)	21	1.12,0.85,1.48	0.405	0.885676	0.660	1.14,0.73,1.79	0.570	0.941	1.20,0.81,2.41	0.276	1.04,0.73,1.47	0.841	0.690	NA		0.39	0.0725
MIP1b	Lung (overall)	19	0.98,0.92,1.03	0.405	0.885676	0.312	1.02,0.93,1.12	0.656	0.232	0.96,0.82,1.04	0.243	1.00,0.93,1.08	0.967	0.249	NA		1.00	0.1257
IL-6	Prostate (high vs low risk)	1	0.75,0.39,1.47	0.406	0.885676												0.09	0.0018
MIP1a	Ovarian (borderline)	24	0.94,0.82,1.08	0.406	0.885676	0.027	0.93,0.70,1.24	0.615	0.909	0.89,0.80,1.01	0.091	0.92,0.79,1.08	0.307	0.043	No significant outliers		0.99	0.1764
HGF	Ovarian (overall, invasive)	6	1.08,0.90,1.31	0.408	0.885676	0.383	1.01,0.81,1.25	0.931	0.226			1.08,0.89,1.30	0.447	0.107	NA		0.61	0.0097
IL-6	Breast (triple negative)	1	1.23,0.75,2.03	0.409	0.885676												0.11	0.0018
IL-7	Prostate (overall)	1	1.08,0.91,1.28	0.409	0.885676												0.63	0.0047
HGF	Ovarian (overall, MA incl. CIMBA)	6	1.07,0.91,1.27	0.409	0.885676	0.387	1.01,0.83,1.22	0.921	0.241			1.07,0.90,1.26	0.436	0.090	NA		0.73	0.0097
SCGFb	Ovarian (borderline)	2	1.30,0.70,2.41	0.409	0.885676	0.047											0.27	0.0161
SCF	Lung (adenocarcinoma)	2	1.18,0.79,1.77	0.41	0.885676	0.758											0.20	0.0036
IL12p70	Ovarian (endometrioid, invasive)	1	0.72,0.33,1.57	0.412	0.885676												0.07	0.0015
MIG	Endometrial (overall)	1	0.92,0.74,1.13	0.412	0.885676												0.60	0.0111
SCGFb	Breast (overall)	2	1.04,0.95,1.14	0.413	0.885676	0.175											1.00	0.0161
IL-2ra	Ovarian (mucinous, invasive)	11	0.94,0.82,1.08	0.414	0.885676	0.865	0.95,0.75,1.21	0.701	0.905	1.01,0.64,1.28	0.947	1.02,0.85,1.23	0.840	0.759	NA		0.94	0.2326
MIG	Breast (luminal B, HER2 neg.)	1	0.92,0.75,1.13	0.415	0.885676												0.67	0.0111
RANTES	Ovarian (clearcell, invasive)	1	0.77,0.42,1.43	0.416	0.885676												0.11	0.0091
Eotaxin	Prostate (overall)	2	0.91,0.72,1.14	0.417	0.885676	0.138											0.71	0.0056
IL-1ra	Ovarian (serous, borderline)	18	0.93,0.77,1.11	0.417	0.885676	0.614	1.10,0.75,1.62	0.628	0.321	0.94,0.75,1.14	0.548	0.92,0.72,1.17	0.504	0.670	NA		0.65	0.0754
IL-7	Ovarian (mucinous, invasive)	1	0.71,0.30,1.64	0.418	0.885676												0.08	0.0047
SCF	Breast (luminal B)	2	1.20,0.77,1.85	0.419	0.885676	0.545											0.27	0.0036
CTACK	Lung (squamous cell)	3	0.94,0.82,1.09	0.419	0.885676	0.209	0.99,0.61,1.60	0.968	0.829	0.97, NA, NA	0.599	0.97,0.86,1.09	0.572				0.97	0.0601
MIP1b	Ovarian (overall, MA incl. CIMBA)	21	0.98,0.93,1.03	0.419	0.885676	0.635	0.95,0.87,1.04	0.292	0.476	0.96,0.90,1.02	0.238	0.96,0.90,1.03	0.315	0.690	NA		1.00	0.1345
IL-2ra	Prostate (advanced)	11	0.98,0.93,1.03	0.42	0.885737	0.657	0.96,0.88,1.04	0.349	0.567	0.98,0.93,1.03	0.437	0.97,0.91,1.03	0.322	0.732	NA		1.00	0.2326
TRAIL	Ovarian (serous, invasive LG)	43	1.35,0.65,2.80	0.421	0.88619	0.000	2.90,0.85,9.96	0.091	0.134	1.48,0.79,2.64	0.158	1.50,0.62,3.65	0.368		2 outlier(s)	1.40,0.73,2.67	0.14	0.0183
IL-7	Prostate (advanced)	1	1.13,0.84,1.51	0.423	0.887432												0.31	0.0047
MIG	Lung (adenocarcinoma)	1	1.10,0.87,1.38	0.424	0.888635												0.51	0.0111
MCP3	Prostate (high vs low+int risk)	9	0.98,0.94,1.03	0.426	0.889438	0.378	1.03,0.94,1.13	0.499	0.247	0.99,0.86,1.05	0.661	0.99,0.94,1.05	0.766	0.410	NA		1.00	0.219
SeSelectin	Ovarian (borderline)	2	0.83,0.52,1.32	0.427	0.889438	0.735											0.16	0.0079
CTACK	Lung (overall)	3	0.96,0.87,1.06	0.427	0.889438	0.126	0.94,0.67,1.34	0.741	0.913	0.98,0.65,0.99	0.510	0.97,0.90,1.05	0.442				1.00	0.0601
MIP1b	Ovarian (serous, MA incl. CIMBA)	21	0.98,0.92,1.04	0.431	0.889939	0.439	0.94,0.85,1.04	0.228	0.358	0.97,0.91,1.03	0.300	0.96,0.89,1.04	0.308	0.503	NA		1.00	0.1345
sICAM	Lung (ever smokers)	22	0.98,0.92,1.04	0.431	0.889939	0.577	0.99,0.85,1.14	0.857	0.886	0.90,0.83,1.07	0.128	0.96,0.88,1.04	0.338	0.576	NA		1.00	0.1468
TRAIL	Lung (overall)	38	0.95,0.83,1.08	0.433	0.889939	0.576	0.87,0.69,1.10	0.257	0.404	0.92,0.81,1.06	0.297	0.99,0.83,1.18	0.895	0.631	NA		0.94	0.0178
MCP3	Lung (small cell)	8	0.96,0.87,1.06	0.433	0.889939	0.843	1.08,0.84,1.37	0.548	0.320	0.96,0.84,1.08	0.615	1.00,0.89,1.13	0.977	0.820	NA		0.99	0.1973
MIG	Lung (overall)	1	1.07,0.91,1.26	0.434	0.889939												0.79	0.0111
PDGFbb	Breast (luminal A)	1	0.86,0.60,1.25	0.438	0.890609												0.21	0.001
IL12p70	Lung (never smokers)	1	0.68,0.25,1.82	0.439	0.890609												0.06	0.0015
activePAI	Ovarian (borderline)	1	1.36,0.62,2.97	0.439	0.890609												0.09	0.0031
RANTES	Breast (triple negative)	1	0.91,0.72,1.15	0.439	0.890609												0.38	0.0091
GROa	Breast (luminal B, HER2 neg.)	11	1.02,0.98,1.06	0.441	0.890609	0.450	1.01,0.95,1.08	0.723	0.843	1.02,0.98,1.06	0.422	1.02,0.97,1.07	0.418	0.595	NA		1.00	0.2724
PDGFbb	Ovarian (overall, MA incl. CIMBA)	1	0.81,0.47,1.39	0.442	0.890609												0.13	0.001
MIG	Ovarian (overall, MA incl. CIMBA)	1	1.06,0.91,1.25	0.442	0.890609												0.79	0.0111
TNF-A	Ovarian (borderline)	2	1.27,0.69,2.31	0.443	0.890609	0.815											0.11	0.0044
IL-18	Ovarian (serous, MA incl. CIMBA)	5	0.97,0.89,1.05	0.443	0.890609	0.610	0.98,0.76,1.27	0.876	0.930	0.97,0.82,1.10	0.688	0.98,0.89,1.08	0.754	0.710	NA		1.00	0.0506
IL-6	Ovarian (overall, invasive)	1	1.18,0.77,1.82	0.444	0.890609												0.16	0.0018
TNF-A	Breast (luminal B, HER2 neg.)	2	1.17,0.79,1.73	0.444	0.890609	0.208											0.32	0.0044
GROa	Lung (small cell)	11	0.97,0.89,1.05	0.444	0.890609	0.521	1.02,0.91,1.15	0.756	0.258	0.99,0.91,1.07	0.718	0.99,0.90,1.09	0.835	0.582	NA		1.00	0.2724
IP-10	Ovarian (serous, borderline)	4	0.84,0.53,1.32	0.445	0.890609	0.706	0.76,0.14,4.22	0.752	0.907			0.93,0.55,1.60	0.805	0.709	NA		0.17	0.0131
PDGFbb	Ovarian (serous, borderline)	1	1.87,0.37,9.40	0.446	0.890821												0.06	0.001
activePAI	Prostate (high vs low+int risk)	1	1.15,0.80,1.65	0.447	0.890821												0.23	0.0031
IL-16	Ovarian (endometrioid, invasive)	17	0.92,0.75,1.14	0.448	0.890821	0.480	0.92,0.70,1.21	0.536	0.946	0.93,0.75,1.15	0.517	0.94,0.74,1.19	0.606	0.599	NA		0.48	0.0351
TNF-A	Prostate (high vs low risk)	2	0.84,0.54,1.31	0.45	0.890821	0.428											0.15	0.0044
TRAIL	Lung (never smokers)	37	0.86,0.58,1.27	0.45	0.890821	0.956	1.17,0.59,2.33	0.660	0.289	0.81,0.50,1.22	0.314	0.92,0.52,1.60	0.760	0.960	NA		0.19	0.0174
VEGF	Endometrial (overall)	21	1.04,0.93,1.17	0.45	0.890821	0.043	1.06,0.88,1.27	0.548	0.849	1.01,0.74,1.13	0.736	1.06,0.95,1.19	0.303	0.052	NA		1.00	0.0725
SCGFb	Endometrial (non-endometrioid)	2	0.83,0.51,1.35	0.451	0.890821	0.931											0.14	0.0161
PDGFbb	Lung (squamous cell)	1	0.71,0.30,1.71	0.452	0.890821												0.08	0.001
GROa	Ovarian (mucinous, invasive)	11	1.04,0.94,1.16	0.452	0.890821	0.650	1.01,0.86,1.18	0.884	0.620	1.04,0.94,1.16	0.439	1.03,0.91,1.17	0.650	0.749	NA		0.97	0.2724
IL12p70	Lung (overall)	1	0.88,0.62,1.23	0.453	0.891703												0.18	0.0015
HGF	Ovarian (serous, invasive LG)	6	0.78,0.40,1.50	0.453	0.892048	0.525	0.59,0.27,1.29	0.186	0.200			0.77,0.39,1.51	0.443	0.154	NA		0.09	0.0097
SeSelectin	Ovarian (mucinous, invasive)	2	1.28,0.67,2.41	0.454	0.892421	0.350											0.10	0.0079
IL-6	Prostate (high vs low+int risk)	1	0.85,0.56,1.30	0.457	0.892421												0.15	0.0018
MCP1	Lung (adenocarcinoma)	16	0.82,0.49,1.38	0.457	0.892421	0.128	2.06,0.98,4.32	0.057	0.003	0.82,0.19,1.38	0.291	1.06,0.63,1.79	0.831	0.021	No significant outliers		0.18	0.0031
RANTES	Prostate (high vs low+int risk)	1	0.93,0.76,1.13	0.457	0.892421												0.54	0.0091
HGF	Breast (luminal B, HER2 neg.)	6	0.92,0.75,1.14	0.457	0.892421	0.954	0.92,0.72,1.18	0.514	0.966			0.92,0.74,1.15	0.471	0.848	NA		0.61	0.0097
HGF	Lung (ever smokers)	6	0.93,0.76,1.13	0.457	0.892421	0.892	0.88,0.69,1.11	0.276	0.393			0.93,0.75,1.14	0.466	0.381	NA		0.42	0.0097
IL-2ra	Ovarian (endometrioid, invasive)	11	1.04,0.94,1.15	0.458	0.892754	0.766	1.02,0.86,1.21	0.787	0.835	1.02,0.90,1.14	0.723	1.04,0.92,1.19	0.531	0.811	NA		1.00	0.2326
SeSelectin	Ovarian (serous, borderline & invasive LG)	2	0.84,0.52,1.34	0.459	0.892754	0.834											0.43	0.0079
PDGFbb	Ovarian (serous, borderline & invasive LG)	1	1.65,0.44,6.27	0.46	0.892754												0.10	0.001
MCP1	Endometrial (non-endometrioid)	23	1.51,0.51,4.49	0.46	0.892754	0.508	1.85,0.27,12.59	0.530	0.800	1.37,0.46,4.27	0.581	1.13,0.25,5.03	0.873	0.542	NA		0.07	0.0042
SCGFb	Breast (HER2 enriched)	2	0.90,0.68,1.19	0.461	0.892754	0.698											0.68	0.0161
PDGFbb	Lung (adenocarcinoma)	1	0.75,0.36,1.60	0.463	0.895956												0.09	0.001
IL-8	Ovarian (mucinous, borderline)	1	1.46,0.53,4.04	0.465	0.897276												0.07	0.0045
IP-10	Ovarian (endometrioid, invasive)	4	0.83,0.50,1.38	0.465	0.897238	0.133	0.55,0.06,5.34	0.606	0.716			1.00,0.61,1.63	0.993	0.123	NA		0.21	0.0131
activePAI	Endometrial (overall)	1	0.86,0.56,1.30	0.467	0.900043												0.22	0.0031
MIP1a	Ovarian (clearcell, invasive)	24	0.94,0.80,1.11	0.469	0.900474	0.296	0.86,0.62,1.21	0.395	0.568	0.92,0.79,1.10	0.339	0.91,0.73,1.12	0.362	0.350	NA		0.86	0.1764
IL-1ra	Breast (luminal B, HER2 neg.)	18	1.03,0.94,1.13	0.47	0.900474	0.130	1.26,1.07,1.49	0.005	0.007	1.08,0.87,1.23	0.217	1.04,0.93,1.16	0.514	0.125	NA		1.00	0.0754
IL-16	Breast (luminal A)	17	1.03,0.95,1.11	0.471	0.900474	0.091	1.03,0.93,1.13	0.587	0.991	1.02,0.96,1.12	0.457	1.04,0.96,1.11	0.340	0.168	NA		1.00	0.0351
TNF-A	Lung (ever smokers)	1	0.86,0.57,1.30	0.473	0.900474												0.16	0.0028
IL-8	Ovarian (serous, borderline & invasive LG)	1	0.79,0.42,1.49	0.473	0.900474												0.27	0.0045
HGF	Prostate (high vs low+int risk)	6	0.93,0.76,1.14	0.474	0.901424	0.307	0.97,0.75,1.24	0.784	0.578			0.93,0.77,1.12	0.455	0.821	NA		0.57	0.0097
IL-8	Ovarian Serous (invasive LG & HG)	1	1.13,0.80,1.60	0.479	0.903305												0.26	0.0045
MIG	Ovarian Serous (invasive LG & HG)	1	0.93,0.75,1.14	0.479	0.903305												0.54	0.0111
SCGFb	Lung (ever smokers)	2	0.93,0.77,1.13	0.48	0.903305	0.257											0.62	0.0161
MCSF	Lung (ever smokers)	10	0.96,0.85,1.08	0.48	0.903305	0.241	0.87,0.63,1.22	0.425	0.556	0.86,0.68,1.27	0.412	1.04,0.90,1.20	0.607	0.223	NA		0.96	0.0439
IL-8	Ovarian (endometrioid, invasive)	1	1.27,0.66,2.44	0.481	0.903305												0.10	0.0045
HGF	Ovarian (serous, invasive HG)	6	1.09,0.86,1.38	0.481	0.903305	0.310	1.04,0.77,1.41	0.786	0.591			1.08,0.86,1.36	0.489	0.388	NA		0.47	0.0097
VEGF	Ovarian (overall, MA incl. CIMBA)	21	1.02,0.96,1.10	0.482	0.903305	0.889	0.99,0.88,1.10	0.813	0.397	1.03,0.94,1.19	0.492	1.01,0.93,1.11	0.747	0.877	NA		1.00	0.0725
IL12p70	Endometrial (endometrioid)	1	1.19,0.73,1.96	0.483	0.903305												0.10	0.0015
MCP1	Ovarian (serous, invasive LG)	25	1.48,0.50,4.38	0.483	0.903305	0.844	2.15,0.32,14.41	0.431	0.637	1.48,0.50,4.35	0.481	1.43,0.32,6.47	0.643	0.877	NA		0.07	0.0043
IP-10	Lung (overall)	4	0.95,0.81,1.11	0.484	0.903305	0.472	1.35,0.74,2.46	0.323	0.226			0.97,0.81,1.18	0.792	0.467	NA		0.85	0.0131
sICAM	Ovarian (serous, borderline & invasive LG)	22	0.96,0.86,1.08	0.485	0.903305	0.499	1.07,0.80,1.43	0.651	0.429	0.87,0.76,1.00	0.051	0.94,0.79,1.11	0.445	0.505	NA		1.00	0.1468
IL12p70	Ovarian (overall, MA incl. CIMBA)	1	0.89,0.65,1.23	0.487	0.903305												0.18	0.0015
TNF-A	Ovarian (mucinous, borderline & invasive)	2	1.26,0.66,2.39	0.488	0.903305	0.829											0.10	0.0044
Eotaxin	Breast (luminal A)	2	0.95,0.81,1.10	0.488	0.903305	0.590											0.77	0.0056
VEGF	Ovarian (serous, invasive HG)	21	1.03,0.94,1.13	0.488	0.903305	0.611	0.98,0.84,1.14	0.771	0.364	1.03,0.93,1.13	0.629	1.02,0.90,1.14	0.796	0.680	NA		1.00	0.0725
sVCAM	Ovarian Serous (invasive LG & HG)	1	1.14,0.79,1.65	0.489	0.903305												0.19	0.003
sVCAM	Ovarian (overall, MA incl. CIMBA)	1	0.91,0.68,1.20	0.49	0.903305												0.30	0.003
IL-6	Ovarian (serous, borderline & invasive LG)	1	1.39,0.54,3.55	0.491	0.903305												0.13	0.0018
IL-8	Lung (never smokers)	1	1.32,0.60,2.89	0.491	0.903305												0.08	0.0045
MIP1b	Prostate (high vs low risk)	20	0.97,0.88,1.06	0.492	0.903305	0.844	0.98,0.84,1.15	0.830	0.814	0.97,0.72,1.11	0.725	1.01,0.89,1.14	0.915	0.789	NA		1.00	0.1311
IL-1ra	Endometrial (non-endometrioid)	18	0.92,0.74,1.16	0.493	0.903305	0.998	1.04,0.64,1.67	0.886	0.596	0.92,0.70,1.19	0.536	0.92,0.69,1.24	0.597	0.998	NA		0.47	0.0754
sVCAM	Lung (squamous cell)	1	0.85,0.54,1.34	0.494	0.903305												0.14	0.003
HGF	Endometrial (endometrioid)	6	0.92,0.72,1.18	0.494	0.903305	0.820	0.96,0.71,1.28	0.764	0.594			0.92,0.71,1.19	0.508	0.576	NA		0.38	0.0097
MIG	Ovarian (clearcell, invasive)	1	1.21,0.70,2.11	0.494	0.903305												0.12	0.0111
activePAI	Ovarian (overall, MA incl. CIMBA)	1	0.89,0.65,1.24	0.497	0.905276												0.31	0.0031
MCP3	Ovarian (serous, invasive LG)	10	0.95,0.82,1.10	0.497	0.905276	0.571	0.83,0.59,1.16	0.272	0.372	0.91,0.76,1.06	0.254	0.94,0.78,1.13	0.483	0.656	NA		0.87	0.2464
Eotaxin	Breast (overall)	2	0.96,0.85,1.08	0.498	0.905276	0.732											0.92	0.0056
MIP1b	Ovarian (mucinous, borderline & invasive)	21	0.94,0.77,1.13	0.498	0.905276	0.007	1.07,0.77,1.48	0.692	0.327	0.88,0.76,1.05	0.116	0.93,0.77,1.11	0.411	0.012	1 outlier(s)	0.91,0.77,1.09	0.95	0.1345
IP-10	Endometrial (endometrioid)	4	1.09,0.85,1.38	0.5	0.905276	0.375	0.72,0.28,1.86	0.497	0.379			0.99,0.74,1.31	0.933	0.418	NA		0.48	0.0131
IP-10	Ovarian (serous, invasive LG)	4	1.24,0.67,2.29	0.5	0.905276	0.815	2.57,0.26,25.20	0.417	0.514			1.11,0.54,2.27	0.781	0.820	NA		0.11	0.0131
VEGF	Prostate (high vs low risk)	21	1.04,0.93,1.17	0.501	0.905276	0.996	1.07,0.88,1.30	0.492	0.727	1.05,0.92,1.19	0.479	1.07,0.92,1.24	0.413	0.998	NA		0.96	0.0725
IL-2ra	Lung (never smokers)	11	0.93,0.77,1.14	0.501	0.905276	0.003	0.89,0.63,1.27	0.528	0.758	0.89,0.79,1.03	0.139	0.92,0.79,1.07	0.299	0.013	1 outlier(s)	0.97,0.82,1.15	0.97	0.2326
IL-18	Prostate (high vs low risk)	5	1.04,0.92,1.18	0.502	0.905276	0.737	1.25,0.84,1.86	0.268	0.344	1.04,0.64,1.38	0.502	1.06,0.91,1.23	0.473	0.700	NA		0.88	0.0506
MIP1a	Prostate (advanced)	23	1.02,0.96,1.08	0.502	0.905276	0.135	1.05,0.93,1.19	0.448	0.620	1.05,0.99,1.10	0.121	1.05,0.97,1.12	0.223	0.163	NA		1.00	0.1724
SCGFb	Ovarian (serous, invasive LG)	2	0.76,0.34,1.70	0.503	0.905276	0.130											0.12	0.0161
IL12p70	Prostate (high vs low risk)	1	1.21,0.69,2.12	0.505	0.905957												0.08	0.0015
sVCAM	Lung (overall)	1	0.91,0.68,1.21	0.507	0.905957												0.30	0.003
MCP3	Lung (overall)	8	1.01,0.98,1.05	0.507	0.905957	0.993	1.00,0.91,1.09	0.917	0.691	1.01,0.80,1.20	0.518	1.01,0.96,1.05	0.724	0.993	NA		1.00	0.2114
IL-2ra	Breast (overall)	11	0.99,0.97,1.01	0.509	0.907389	0.840	0.99,0.95,1.03	0.554	0.800	1.00,0.97,1.03	0.862	1.00,0.97,1.02	0.764	0.870	NA		1.00	0.2326
SeSelectin	Endometrial (endometrioid)	2	1.10,0.83,1.47	0.512	0.90922	0.540											0.32	0.0079
sICAM	Prostate (advanced)	22	0.98,0.93,1.04	0.512	0.90922	0.958	0.96,0.84,1.11	0.615	0.789	1.00,0.91,1.09	0.957	1.01,0.93,1.09	0.844	0.955	NA		1.00	0.1468
IL12p70	Ovarian (serous, MA incl. CIMBA)	1	0.89,0.63,1.27	0.515	0.911464												0.14	0.0015
SCF	Ovarian (serous, invasive HG)	2	1.19,0.71,1.99	0.516	0.911464	0.175											0.21	0.0036
MIP1b	Breast (HER2 enriched)	21	0.96,0.85,1.08	0.516	0.911464	0.319	1.04,0.85,1.28	0.683	0.325	0.96,0.85,1.22	0.556	0.95,0.82,1.11	0.511	0.359	NA		1.00	0.1345
PDGFbb	Ovarian (mucinous, borderline & invasive)	1	1.58,0.39,6.36	0.52	0.914455												0.06	0.001
IL-8	Breast (HER2 enriched)	1	0.83,0.47,1.46	0.521	0.914455												0.25	0.0045
IL12p70	Ovarian (overall, invasive)	1	0.89,0.62,1.27	0.523	0.914455												0.14	0.0015
MIG	Endometrial (endometrioid)	1	0.92,0.72,1.18	0.523	0.914455												0.42	0.0111
VEGF	Lung (ever smokers)	21	1.03,0.95,1.12	0.523	0.914455	0.919	0.99,0.87,1.13	0.909	0.520	1.02,0.93,1.19	0.658	1.00,0.90,1.10	0.942	0.906	NA		1.00	0.0725
MIP1b	Breast (luminal B)	21	0.97,0.89,1.06	0.523	0.914455	0.302	1.02,0.88,1.18	0.756	0.395	1.00,0.90,1.17	1.000	1.00,0.89,1.11	0.935	0.328	NA		1.00	0.1345
IL-16	Ovarian (mucinous, borderline)	17	0.90,0.65,1.24	0.525	0.915863	0.592	0.94,0.62,1.43	0.770	0.751	0.86, NA, NA	0.432	0.92,0.63,1.34	0.649	0.663	NA		0.24	0.0351
TRAIL	Endometrial (endometrioid)	42	1.07,0.87,1.32	0.528	0.916671	0.257	0.84,0.59,1.19	0.318	0.088	1.05,0.85,1.30	0.626	1.05,0.79,1.38	0.747	0.314	NA		0.61	0.018
HGF	Lung (overall)	6	0.95,0.81,1.11	0.529	0.916671	0.870	0.94,0.78,1.13	0.502	0.790			0.95,0.81,1.12	0.539	0.866	NA		0.73	0.0097
MIF	Endometrial (endometrioid)	2	1.09,0.84,1.41	0.53	0.916671	0.189											0.63	0.019
SeSelectin	Breast (overall)	2	1.07,0.87,1.30	0.531	0.916671	0.040											0.98	0.0079
activePAI	Ovarian Serous (invasive LG & HG)	1	0.87,0.58,1.33	0.532	0.916671												0.19	0.0031
RANTES	Lung (adenocarcinoma)	1	0.93,0.73,1.18	0.533	0.916671												0.43	0.0091
IL12p70	Ovarian (mucinous, borderline & invasive)	1	0.77,0.34,1.74	0.534	0.916671												0.07	0.0015
MCP1	Ovarian (mucinous, invasive)	25	1.33,0.54,3.30	0.534	0.916671	0.737	3.05,0.63,14.79	0.166	0.210	1.65,0.66,4.90	0.283	1.64,0.47,5.78	0.439	0.785	NA		0.08	0.0043
IP-10	Ovarian (overall, invasive)	4	1.06,0.89,1.25	0.534	0.916671	0.504	1.14,0.57,2.26	0.717	0.830			1.07,0.87,1.32	0.514	0.532	NA		0.73	0.0131
TRAIL	Lung (small cell)	39	1.11,0.80,1.55	0.534	0.916671	0.588	1.10,0.61,1.96	0.755	0.959	1.09,0.77,1.56	0.623	1.11,0.68,1.80	0.674	0.625	NA		0.25	0.0178
PDGFbb	Prostate (high vs low risk)	1	0.74,0.29,1.90	0.536	0.918401												0.07	0.001
SeSelectin	Lung (adenocarcinoma)	2	1.09,0.83,1.41	0.538	0.918401	0.414											0.39	0.0079
Eotaxin	Ovarian (serous, MA incl. CIMBA)	2	0.93,0.72,1.19	0.539	0.918401	0.506											0.39	0.0056
MIG	Breast (overall)	1	0.97,0.90,1.06	0.539	0.918401												1.00	0.0111
SCGFb	Ovarian (mucinous, invasive)	2	1.15,0.74,1.78	0.539	0.918401	0.595											0.15	0.0161
sVCAM	Endometrial (non-endometrioid)	1	0.72,0.25,2.05	0.541	0.919039												0.07	0.003
VEGF	Prostate (high vs low+int risk)	21	0.98,0.90,1.05	0.542	0.919039	0.741	0.97,0.86,1.11	0.682	0.963	0.99,0.90,1.13	0.783	0.97,0.88,1.07	0.535	0.796	NA		1.00	0.0725
sICAM	Ovarian (clearcell, invasive)	22	0.95,0.81,1.12	0.542	0.919039	0.496	1.27,0.85,1.91	0.247	0.128	1.04,0.86,1.27	0.703	1.06,0.85,1.32	0.619	0.523	NA		0.79	0.1468
CTACK	Ovarian (mucinous, borderline)	3	1.09,0.83,1.43	0.543	0.919039	0.962	1.17,0.60,2.29	0.644	0.813	1.10,0.34,2.76	0.540	1.09,0.82,1.46	0.543				0.37	0.0601
IL-16	Lung (small cell)	15	0.94,0.75,1.16	0.544	0.919673	0.604	0.86,0.65,1.13	0.285	0.341	0.91,0.71,1.17	0.553	0.91,0.71,1.17	0.473	0.666	NA		0.42	0.0344
IP-10	Prostate (advanced)	4	0.95,0.79,1.13	0.547	0.919951	0.590	0.99,0.49,1.98	0.975	0.896			0.93,0.75,1.16	0.532	0.595	NA		0.68	0.0131
SCF	Ovarian Serous (invasive LG & HG)	2	1.18,0.68,2.06	0.548	0.919951	0.134											0.21	0.0036
sICAM	Prostate (high vs low risk)	22	0.98,0.90,1.06	0.548	0.920344	0.660	1.13,0.92,1.39	0.254	0.135	0.99,0.90,1.11	0.859	1.00,0.90,1.12	0.979	0.679	NA		1.00	0.1468
HGF	Lung (small cell)	6	0.88,0.59,1.33	0.551	0.921359	0.812	0.92,0.57,1.50	0.748	0.739			0.89,0.58,1.35	0.583	0.682	NA		0.16	0.0097
IL-7	Ovarian (serous, MA incl. CIMBA)	1	1.09,0.82,1.43	0.552	0.921359												0.34	0.0047
SeSelectin	Breast (HER2 enriched)	2	1.13,0.75,1.71	0.552	0.921359	0.570											0.40	0.0079
IL-1ra	Lung (small cell)	16	0.95,0.79,1.14	0.554	0.922056	0.159	1.02,0.69,1.51	0.902	0.648	0.96,0.81,1.18	0.605	0.93,0.75,1.14	0.474	0.187	NA		0.73	0.073
IL12p70	Ovarian Serous (invasive LG & HG)	1	0.88,0.59,1.33	0.556	0.922056												0.12	0.0015
IL-1ra	Prostate (advanced)	18	0.98,0.91,1.05	0.556	0.922091	0.504	1.15,0.98,1.34	0.085	0.023	0.98,0.90,1.08	0.730	0.98,0.89,1.08	0.707	0.548	NA		1.00	0.0754
PDGFbb	Breast (luminal B)	1	1.27,0.56,2.90	0.562	0.928936												0.11	0.001
TNF-A	Endometrial (overall)	2	0.89,0.60,1.32	0.563	0.928936	0.236											0.29	0.0044
MCSF	Ovarian (mucinous, invasive)	11	1.08,0.83,1.42	0.563	0.928936	0.995	1.25,0.59,2.65	0.559	0.688	1.11,0.75,1.75	0.536	1.07,0.76,1.52	0.685	0.996	NA		0.35	0.0457
MIP1b	Ovarian (serous, borderline)	21	1.05,0.89,1.23	0.564	0.928936	0.371	0.93,0.71,1.23	0.629	0.309	0.92,0.73,2.49	0.442	0.90,0.73,1.12	0.346	0.210	NA		0.88	0.1345
IL-8	Breast (overall)	1	0.96,0.84,1.10	0.565	0.928936												0.85	0.0045
IL-16	Lung (never smokers)	17	1.08,0.82,1.42	0.566	0.928936	0.405	1.19,0.83,1.71	0.347	0.431	1.19,0.90,1.56	0.226	1.10,0.81,1.51	0.537	0.536	NA		0.33	0.035
sVCAM	Ovarian (serous, borderline & invasive LG)	1	1.23,0.61,2.46	0.567	0.928936												0.19	0.003
IL-18	Endometrial (endometrioid)	5	0.97,0.86,1.08	0.567	0.928936	0.475	1.06,0.73,1.55	0.749	0.605	0.93,0.70,1.17	0.316	0.96,0.84,1.10	0.566	0.565	NA		0.96	0.0506
MCSF	Ovarian (overall, invasive)	11	1.03,0.94,1.12	0.569	0.928936	0.769	1.02,0.79,1.31	0.865	0.969	1.05,0.93,1.29	0.297	1.03,0.92,1.17	0.589	0.796	NA		1.00	0.0457
SCGFb	Ovarian (endometrioid, invasive)	2	1.25,0.58,2.66	0.57	0.928936	0.018											0.25	0.0161
IL-16	Ovarian (overall, MA incl. CIMBA)	17	1.03,0.93,1.14	0.57	0.928936	0.164	1.01,0.88,1.15	0.933	0.586	1.31,0.89,1.55	0.633	1.01,0.91,1.13	0.792	0.082	NA		1.00	0.0351
sICAM	Lung (adenocarcinoma)	21	0.98,0.91,1.05	0.57	0.928936	0.288	0.99,0.82,1.18	0.888	0.930	0.97,0.87,1.08	0.620	0.96,0.88,1.05	0.397	0.312	NA		1.00	0.142
MCSF	Prostate (high vs low risk)	11	0.96,0.84,1.10	0.572	0.928936	0.751	1.14,0.78,1.68	0.493	0.339	0.99,0.84,1.13	0.861	0.97,0.81,1.16	0.738	0.804	NA		0.84	0.0457
IL-6	Endometrial (overall)	1	0.87,0.53,1.43	0.573	0.928936												0.14	0.0018
Eotaxin	Ovarian (mucinous, borderline)	2	0.78,0.33,1.83	0.573	0.928936	0.392											0.08	0.0056
Eotaxin	Ovarian (serous, borderline & invasive LG)	2	1.17,0.68,2.02	0.574	0.928936	0.891											0.32	0.0056
activePAI	Ovarian (serous, borderline)	1	1.31,0.50,3.42	0.576	0.928936												0.08	0.0031
HGF	Prostate (high vs low risk)	6	0.91,0.64,1.28	0.576	0.928936	0.192	1.03,0.70,1.52	0.890	0.224			0.91,0.68,1.22	0.538	0.345	NA		0.28	0.0097
IL-18	Prostate (overall)	5	0.99,0.94,1.04	0.576	0.928936	0.720	1.09,0.93,1.27	0.306	0.207	0.98,0.77,1.04	0.748	0.99,0.93,1.05	0.692	0.648	NA		1.00	0.0506
PDGFbb	Endometrial (overall)	1	1.22,0.60,2.47	0.578	0.928936												0.10	0.001
CTACK	Endometrial (non-endometrioid)	3	1.09,0.81,1.45	0.58	0.928936	0.307	0.81,0.37,1.78	0.595	0.421	1.09,0.25,2.17	0.707	1.08,0.81,1.46	0.590				0.39	0.0601
CTACK	Prostate (overall)	3	0.97,0.88,1.07	0.58	0.928936	0.018	0.88,0.68,1.14	0.334	0.406	0.93, NA, NA	0.030	0.97,0.92,1.03	0.331				1.00	0.0601
VEGF	Ovarian (serous, borderline & invasive LG)	21	1.05,0.89,1.24	0.583	0.930635	0.547	1.03,0.79,1.36	0.812	0.900	1.01,0.73,1.31	0.941	1.05,0.85,1.30	0.654	0.612	NA		1.00	0.0725
HGF	Prostate (advanced)	6	1.06,0.87,1.28	0.585	0.932136	0.958	1.05,0.84,1.32	0.651	0.978			1.06,0.86,1.29	0.592	0.979	NA		0.55	0.0097
TNF-A	Breast (HER2 enriched)	2	0.86,0.51,1.46	0.588	0.934417	0.930											0.25	0.0044
RANTES	Prostate (high vs low risk)	1	0.92,0.67,1.25	0.588	0.934417												0.26	0.0091
MIP1b	Ovarian (overall, invasive)	21	0.98,0.93,1.04	0.59	0.936707	0.886	0.95,0.86,1.05	0.299	0.372	0.98,0.91,1.13	0.636	0.97,0.89,1.05	0.389	0.887	NA		1.00	0.1345
HGF	Lung (never smokers)	6	1.16,0.67,2.00	0.593	0.93733	0.232	1.16,0.56,2.40	0.699	0.984	1.88,1.88,2.25	1.000	1.16,0.72,1.88	0.536	0.616	NA		0.13	0.0097
PDGFbb	Prostate (high vs low+int risk)	1	0.85,0.46,1.56	0.594	0.937515												0.11	0.001
IL-1ra	Ovarian Serous (invasive LG & HG)	18	1.02,0.94,1.12	0.594	0.937515	0.258	1.05,0.87,1.28	0.585	0.734	1.03,0.77,1.17	0.511	1.05,0.94,1.19	0.391	0.243	NA		1.00	0.0754
IL-7	Ovarian (clearcell, invasive)	1	1.26,0.54,2.93	0.598	0.940413												0.08	0.0047
GROa	Prostate (overall)	11	1.01,0.97,1.06	0.6	0.940697	0.000	0.98,0.91,1.04	0.475	0.136	1.00,0.98,1.02	1.000	1.00,0.98,1.03	0.853		2 outlier(s)	1.00,0.98,1.02	1.00	0.2724
TRAIL	Lung (adenocarcinoma)	37	1.05,0.88,1.26	0.601	0.940697	0.519	0.97,0.70,1.33	0.845	0.553	1.04,0.87,1.27	0.659	1.09,0.85,1.39	0.520	0.544	NA		0.70	0.0177
MIF	Lung (adenocarcinoma)	2	0.91,0.64,1.30	0.601	0.940697	0.047											0.74	0.019
MCP3	Endometrial (overall)	9	0.99,0.94,1.03	0.603	0.940697	0.686	1.07,0.94,1.20	0.304	0.184	1.01,0.87,1.06	0.907	1.00,0.94,1.06	0.981	0.561	NA		1.00	0.2386
IL12p70	Lung (ever smokers)	1	0.89,0.58,1.37	0.604	0.940697												0.11	0.0015
Eotaxin	Endometrial (endometrioid)	2	0.91,0.65,1.29	0.604	0.940697	0.445											0.24	0.0056
IL-18	Breast (triple negative)	5	1.03,0.93,1.13	0.604	0.940697	0.366	1.15,0.82,1.60	0.420	0.491	0.99,0.73,1.13	0.842	1.02,0.91,1.15	0.681	0.439	NA		0.98	0.0506
MCP3	Lung (squamous cell)	8	0.98,0.93,1.04	0.604	0.940697	0.971	0.98,0.85,1.14	0.814	0.973	0.97,0.68,1.31	0.577	0.98,0.91,1.05	0.583	0.977	NA		1.00	0.2114
MIF	Ovarian (serous, borderline)	2	0.88,0.53,1.45	0.608	0.94421	0.177											0.22	0.019
sVCAM	Breast (luminal B)	1	0.90,0.59,1.37	0.61	0.945448												0.24	0.003
IL-16	Ovarian Serous (invasive LG & HG)	17	1.03,0.92,1.15	0.61	0.945448	0.608	1.01,0.88,1.17	0.876	0.707	0.99,0.87,1.52	0.935	1.00,0.88,1.15	0.954	0.452	NA		0.96	0.0351
IL-6	Ovarian (overall, MA incl. CIMBA)	1	1.10,0.75,1.62	0.611	0.94615												0.20	0.0018
MCP1	Breast (luminal A)	25	1.05,0.86,1.28	0.612	0.947241	0.273	0.91,0.65,1.27	0.566	0.286	1.00,0.84,1.20	1.000	1.11,0.86,1.45	0.422	0.306	NA		0.66	0.0043
MCP1	Endometrial (endometrioid)	24	1.11,0.74,1.68	0.614	0.948379	0.918	0.80,0.39,1.66	0.549	0.282	1.11,0.74,1.66	0.618	0.98,0.56,1.74	0.956	0.922	NA		0.19	0.0043
IL-18	Breast (HER2 enriched)	5	0.96,0.82,1.12	0.614	0.948477	0.562	1.20,0.73,1.98	0.478	0.361	1.01,0.58,1.51	0.878	1.04,0.86,1.25	0.712	0.449	NA		0.99	0.0506
IL-1ra	Prostate (high vs low risk)	18	0.96,0.83,1.12	0.615	0.948719	0.014	1.02,0.74,1.40	0.890	0.674	1.01,0.87,1.18	0.858	0.99,0.85,1.16	0.929	0.016	No significant outliers		0.97	0.0754
MCP1	Ovarian (serous, borderline)	25	0.82,0.37,1.81	0.617	0.949696	0.612	1.70,0.42,6.83	0.454	0.208	0.82,0.37,1.80	0.622	0.73,0.24,2.23	0.578	0.647	NA		0.09	0.0043
HGF	Breast (luminal B)	6	0.92,0.67,1.27	0.618	0.950508	0.128	0.95,0.62,1.45	0.805	0.800	0.71,0.65,0.71	1.000	0.92,0.72,1.19	0.543	0.860	NA		0.61	0.0097
MIP1b	Ovarian Serous (invasive LG & HG)	21	0.98,0.92,1.05	0.619	0.950557	0.699	0.93,0.82,1.04	0.209	0.233	0.98,0.91,1.05	0.583	0.95,0.87,1.05	0.317	0.734	NA		1.00	0.1345
MIF	Ovarian (endometrioid, invasive)	2	0.93,0.68,1.26	0.623	0.953126	0.837											0.29	0.019
IL-2ra	Lung (adenocarcinoma)	10	0.99,0.93,1.05	0.624	0.953126	0.392	1.00,0.90,1.12	0.932	0.667	0.97,0.91,1.03	0.355	0.99,0.93,1.07	0.884	0.513	NA		1.00	0.1803
IL-2ra	Ovarian (overall, MA incl. CIMBA)	11	0.99,0.95,1.03	0.624	0.953126	0.888	1.00,0.94,1.07	0.916	0.623	1.00,0.95,1.04	0.916	1.00,0.95,1.05	0.971	0.896	NA		1.00	0.2326
HGF	Ovarian (serous, MA incl. CIMBA)	6	1.05,0.87,1.25	0.625	0.953126	0.431	1.00,0.80,1.24	0.981	0.416			1.04,0.87,1.26	0.663	0.229	NA		0.60	0.0097
IL-18	Ovarian (overall, invasive)	5	1.02,0.94,1.11	0.625	0.953126	0.762	1.05,0.81,1.36	0.725	0.833	1.04,0.93,1.12	0.414	1.03,0.94,1.14	0.478	0.833	NA		1.00	0.0506
MCP3	Breast (overall)	10	0.99,0.97,1.02	0.625	0.953126	0.073	1.02,0.96,1.08	0.543	0.362	0.98,0.95,1.00	0.113	0.99,0.97,1.02	0.633	0.093	NA		1.00	0.2464
MCP1	Ovarian (overall, MA incl. CIMBA)	25	1.09,0.78,1.52	0.627	0.953447	0.043	1.08,0.60,1.96	0.790	0.994	1.16,0.72,1.63	0.630	1.08,0.74,1.57	0.701	0.081	NA		0.40	0.0043
IL-1ra	Ovarian (borderline)	18	1.04,0.89,1.21	0.627	0.953447	0.725	1.01,0.74,1.38	0.951	0.846	0.99,0.82,1.42	0.909	0.98,0.80,1.19	0.822	0.761	NA		0.83	0.0754
IL-2ra	Endometrial (overall)	10	1.01,0.96,1.07	0.629	0.954078	0.540	1.00,0.91,1.10	0.968	0.768	1.00, NA, NA	0.906	1.01,0.94,1.09	0.727	0.513	NA		1.00	0.1787
GROa	Ovarian (clearcell, invasive)	11	0.97,0.87,1.09	0.629	0.954078	0.788	0.98,0.83,1.15	0.774	0.956	1.00,0.89,1.10	0.970	0.99,0.87,1.12	0.841	0.812	NA		0.97	0.2724
RANTES	Ovarian (borderline)	1	0.90,0.58,1.39	0.631	0.954078												0.17	0.0091
IL-2ra	Ovarian (clearcell, invasive)	11	1.04,0.90,1.20	0.632	0.954078	0.428	0.88,0.69,1.13	0.319	0.114	1.00,0.81,1.30	0.954	0.93,0.76,1.12	0.426	0.350	NA		0.94	0.2326
IL-7	Ovarian (serous, invasive HG)	1	1.08,0.78,1.51	0.633	0.954078												0.26	0.0047
Eotaxin	Ovarian (borderline)	2	0.88,0.51,1.50	0.634	0.954078	0.679											0.12	0.0056
MCP3	Breast (luminal B)	10	0.99,0.93,1.04	0.635	0.954078	0.303	1.07,0.94,1.21	0.305	0.168	0.96,0.91,1.03	0.228	0.98,0.92,1.05	0.640	0.390	NA		1.00	0.2464
MCP1	Ovarian (clearcell, invasive)	25	1.24,0.50,3.10	0.641	0.959003	0.827	1.21,0.24,5.99	0.815	0.968	1.25,0.48,3.10	0.641	1.15,0.32,4.10	0.831	0.860	NA		0.08	0.0043
IL-7	Breast (overall)	1	0.97,0.85,1.10	0.641	0.959003												0.87	0.0047
Eotaxin	Ovarian Serous (invasive LG & HG)	2	1.07,0.80,1.43	0.641	0.959003	0.500											0.31	0.0056
HGF	Endometrial (overall)	6	0.95,0.77,1.17	0.643	0.95913	0.687	0.97,0.76,1.24	0.804	0.782			0.95,0.77,1.18	0.668	0.767	NA		0.55	0.0097
IL-2ra	Ovarian (overall, invasive)	11	0.99,0.94,1.04	0.643	0.95913	0.981	1.00,0.93,1.08	0.964	0.692	0.99,0.89,1.05	0.661	0.99,0.94,1.05	0.863	0.976	NA		1.00	0.2326
PDGFbb	Lung (never smokers)	1	0.68,0.13,3.51	0.646	0.960035												0.06	0.001
SCF	Ovarian (endometrioid, invasive)	2	0.85,0.42,1.70	0.647	0.960035	0.718											0.09	0.0036
PDGFbb	Lung (ever smokers)	1	0.85,0.43,1.70	0.648	0.960035												0.09	0.001
IL-8	Ovarian (borderline)	1	1.16,0.61,2.20	0.648	0.960035												0.11	0.0045
activePAI	Ovarian (mucinous, borderline)	1	1.33,0.39,4.53	0.649	0.960035												0.07	0.0031
IL-7	Ovarian (endometrioid, invasive)	1	0.87,0.47,1.60	0.65	0.960035												0.11	0.0047
MCSF	Ovarian (endometrioid, invasive)	11	1.05,0.86,1.28	0.65	0.960035	0.396	0.91,0.51,1.62	0.743	0.602	1.15,0.83,1.70	0.262	1.02,0.78,1.33	0.893	0.414	NA		0.58	0.0457
MCP3	Endometrial (endometrioid)	9	0.99,0.94,1.04	0.65	0.960035	0.758	1.06,0.92,1.22	0.415	0.284	1.00,0.81,1.07	0.982	1.01,0.94,1.08	0.787	0.744	NA		1.00	0.2386
IL-18	Breast (luminal A)	5	0.99,0.94,1.04	0.652	0.960582	0.675	1.06,0.91,1.24	0.440	0.336	0.99,0.83,1.06	0.853	1.01,0.95,1.06	0.843	0.624	NA		1.00	0.0506
MIP1a	Lung (ever smokers)	21	1.02,0.95,1.09	0.652	0.960582	0.153	0.98,0.85,1.12	0.721	0.486	0.98,0.92,1.06	0.762	0.99,0.91,1.08	0.840	0.179	NA		1.00	0.1559
MCP1	Ovarian (serous, MA incl. CIMBA)	25	1.09,0.75,1.59	0.653	0.960582	0.033	1.09,0.56,2.14	0.798	0.996	1.09,0.77,1.55	0.569	1.12,0.74,1.71	0.593	0.059	NA		0.31	0.0043
SCF	Lung (small cell)	2	1.18,0.56,2.48	0.655	0.960582	0.418											0.09	0.0036
CTACK	Ovarian (borderline)	3	1.04,0.88,1.24	0.655	0.960582	0.542	1.24,0.81,1.90	0.326	0.381	1.11,0.58,2.22	0.563	1.05,0.87,1.27	0.615				0.74	0.0601
sVCAM	Lung (adenocarcinoma)	1	0.91,0.62,1.36	0.656	0.960582												0.18	0.003
MCP1	Lung (never smokers)	16	0.81,0.31,2.07	0.656	0.960582	0.844	1.78,0.36,8.93	0.481	0.233	0.88,0.31,2.28	0.801	1.02,0.33,3.17	0.978	0.669	NA		0.07	0.0031
MIP1a	Breast (luminal B, HER2 neg.)	24	0.99,0.93,1.05	0.656	0.960582	0.428	0.96,0.85,1.08	0.517	0.620	0.97,0.89,1.04	0.368	0.97,0.90,1.05	0.499	0.463	NA		1.00	0.1764
GROa	Lung (ever smokers)	10	1.01,0.97,1.05	0.656	0.960582	0.403	0.99,0.93,1.06	0.855	0.528	1.01,0.97,1.04	0.687	1.00,0.95,1.05	0.968	0.465	NA		1.00	0.2679
PDGFbb	Ovarian (clearcell, invasive)	1	1.52,0.24,9.79	0.657	0.960582												0.06	0.001
SCF	Prostate (high vs low+int risk)	2	1.11,0.70,1.75	0.659	0.960782	0.172											0.24	0.0033
IL-1ra	Prostate (high vs low+int risk)	18	0.98,0.92,1.05	0.659	0.960782	0.650	1.04,0.90,1.20	0.601	0.406	1.01,0.94,1.09	0.870	1.01,0.92,1.11	0.782	0.662	NA		1.00	0.0754
sVCAM	Breast (luminal B, HER2 neg.)	1	0.92,0.64,1.32	0.66	0.960782												0.24	0.003
TRAIL	Ovarian (serous, borderline & invasive LG)	43	1.10,0.73,1.65	0.66	0.960782	0.003	1.72,0.87,3.44	0.122	0.113	1.10,0.78,1.52	0.585	1.22,0.77,1.95	0.392	0.004	No significant outliers		0.77	0.0183
HGF	Ovarian Serous (invasive LG & HG)	6	1.05,0.85,1.30	0.661	0.960782	0.391	0.99,0.76,1.29	0.953	0.429	1.29,1.29,1.39	1.000	1.04,0.84,1.30	0.706	0.283	NA		0.49	0.0097
TRAIL	Ovarian (mucinous, borderline)	43	1.12,0.67,1.86	0.661	0.960782	0.288	0.76,0.32,1.79	0.525	0.268	1.08,0.64,1.84	0.838	0.93,0.47,1.83	0.826	0.350	NA		0.15	0.0183
IL-16	Prostate (overall)	17	0.99,0.93,1.05	0.662	0.960994	0.346	1.03,0.95,1.11	0.455	0.085	0.98,0.93,1.04	0.714	1.00,0.93,1.07	0.956	0.427	NA		1.00	0.0351
TNF-A	Ovarian (overall, MA incl. CIMBA)	2	1.07,0.79,1.46	0.667	0.962337	0.205											0.41	0.0044
RANTES	Ovarian (mucinous, invasive)	1	0.87,0.47,1.61	0.667	0.962337												0.11	0.0091
MIF	Ovarian (serous, invasive HG)	2	0.95,0.77,1.18	0.667	0.962337	0.206											0.75	0.019
CTACK	Prostate (advanced)	3	0.98,0.90,1.07	0.667	0.962337	0.360	0.87,0.71,1.06	0.165	0.185	0.94,0.71,1.36	0.364	0.97,0.88,1.06	0.445				1.00	0.0601
sICAM	Breast (HER2 enriched)	22	1.03,0.91,1.16	0.667	0.962337	0.096	1.11,0.81,1.53	0.506	0.587	1.18,1.04,1.34	0.024	1.06,0.90,1.24	0.501	0.062	NA		1.00	0.1398
MCP1	Lung (overall)	17	0.90,0.56,1.44	0.668	0.962337	0.047	2.20,1.01,4.82	0.048	0.009	0.90,0.58,1.40	0.507	1.13,0.69,1.86	0.617	0.037	No significant outliers		0.25	0.0025
activePAI	Breast (luminal B, HER2 neg.)	1	1.10,0.72,1.68	0.669	0.962337												0.25	0.0031
HGF	Ovarian (mucinous, borderline)	6	0.84,0.38,1.87	0.67	0.962337	0.111	0.87,0.30,2.49	0.795	0.902	0.45,0.36,0.45	1.000	0.84,0.45,1.55	0.572	0.802	NA		0.10	0.0097
TRAIL	Breast (luminal A)	43	0.98,0.88,1.09	0.67	0.962337	0.025	0.97,0.81,1.17	0.763	0.947	0.96,0.87,1.07	0.340	0.95,0.83,1.08	0.419	0.038	No significant outliers		1.00	0.0183
IL-7	Ovarian (mucinous, borderline)	1	0.82,0.32,2.10	0.675	0.962337												0.07	0.0047
PDGFbb	Breast (HER2 enriched)	1	1.29,0.39,4.22	0.676	0.962337												0.09	0.001
sVCAM	Ovarian (serous, invasive HG)	1	1.08,0.74,1.59	0.676	0.962337												0.18	0.003
SeSelectin	Breast (luminal B, HER2 neg.)	2	1.05,0.83,1.34	0.676	0.962337	0.530											0.52	0.0079
SCGFb	Ovarian (serous, borderline)	2	1.15,0.61,2.16	0.676	0.962337	0.097											0.19	0.0161
MCP3	Ovarian (serous, MA incl. CIMBA)	10	0.99,0.95,1.03	0.681	0.963243	0.334	0.98,0.89,1.09	0.764	0.883	0.98,0.94,1.07	0.337	0.99,0.94,1.04	0.777	0.417	NA		1.00	0.2464
IL-1ra	Ovarian (overall, invasive)	18	1.02,0.94,1.11	0.682	0.963243	0.131	1.03,0.87,1.24	0.707	0.832	0.86,0.75,1.14	0.354	1.05,0.95,1.16	0.363	0.125	NA		1.00	0.0754
IL-18	Ovarian (mucinous, borderline)	5	0.95,0.72,1.24	0.683	0.963243	0.744	1.45,0.61,3.41	0.397	0.305	0.95,0.31,1.69	0.683	1.04,0.75,1.44	0.813	0.634	NA		0.32	0.0506
MIP1b	Ovarian (borderline)	21	0.97,0.84,1.12	0.684	0.963243	0.228	1.02,0.80,1.31	0.864	0.616	0.89,0.78,1.06	0.187	0.90,0.76,1.07	0.239	0.207	NA		0.97	0.1345
IL-6	Prostate (overall)	1	1.06,0.81,1.37	0.687	0.96599												0.29	0.0018
sVCAM	Lung (ever smokers)	1	1.08,0.75,1.54	0.687	0.96599												0.16	0.003
Eotaxin	Ovarian (endometrioid, invasive)	2	0.89,0.51,1.57	0.69	0.967824	0.302											0.12	0.0056
IL-7	Ovarian Serous (invasive LG & HG)	1	1.07,0.77,1.47	0.694	0.970311												0.27	0.0047
IL12p70	Ovarian (serous, borderline)	1	0.83,0.32,2.12	0.695	0.970666												0.06	0.0015
SCF	Ovarian (serous, invasive LG)	2	1.26,0.40,3.97	0.696	0.970666	0.348											0.07	0.0036
MIF	Lung (never smokers)	2	1.13,0.61,2.09	0.697	0.970666	0.112											0.20	0.019
IL-1ra	Ovarian (serous, MA incl. CIMBA)	18	1.02,0.93,1.11	0.698	0.970666	0.030	1.10,0.91,1.33	0.341	0.383	0.88,0.74,1.20	0.068	1.06,0.96,1.17	0.242	0.020	No significant outliers		1.00	0.0754
SeSelectin	Ovarian (mucinous, borderline & invasive)	2	1.10,0.68,1.79	0.699	0.970666	0.629											0.14	0.0079
PDGFbb	Ovarian Serous (invasive LG & HG)	1	0.87,0.43,1.77	0.7	0.970666												0.09	0.001
SCGFb	Breast (luminal A)	2	1.02,0.93,1.11	0.7	0.970666	0.683											1.00	0.0161
MCP1	Lung (ever smokers)	17	0.91,0.55,1.49	0.704	0.972236	0.080	1.81,0.87,3.75	0.110	0.020	0.91,0.56,1.50	0.577	1.12,0.68,1.85	0.651	0.052	NA		0.17	0.0031
activePAI	Ovarian (mucinous, borderline & invasive)	1	0.85,0.38,1.94	0.705	0.972236												0.08	0.0031
SCGFb	Breast (luminal B)	2	0.95,0.74,1.23	0.705	0.972236	0.193											0.82	0.0161
TRAIL	Ovarian (overall, MA incl. CIMBA)	43	1.03,0.90,1.17	0.705	0.972236	0.338	1.01,0.80,1.27	0.965	0.827	1.00,0.88,1.15	0.932	1.06,0.88,1.27	0.554	0.387	NA		0.94	0.0183
VEGF	Breast (triple negative)	21	1.02,0.91,1.15	0.705	0.972236	0.055	1.03,0.85,1.25	0.776	0.941	1.04, NA, NA	0.435	1.02,0.91,1.15	0.721	0.086	NA		1.00	0.0725
MIG	Ovarian (serous, invasive LG)	1	1.13,0.59,2.19	0.707	0.972958												0.10	0.0111
MIP1b	Breast (triple negative)	21	1.01,0.95,1.09	0.709	0.974719	0.714	1.01,0.90,1.14	0.822	0.996	0.98,0.91,1.07	0.647	0.99,0.90,1.09	0.830	0.733	NA		1.00	0.1345
MIF	Lung (overall)	2	0.94,0.67,1.32	0.71	0.974719	0.010											0.95	0.019
activePAI	Lung (adenocarcinoma)	1	0.92,0.59,1.43	0.711	0.974719												0.18	0.0031
IL-2ra	Lung (small cell)	12	0.98,0.89,1.09	0.711	0.974719	0.979	0.93,0.78,1.10	0.384	0.418	0.97,0.83,1.11	0.568	0.98,0.86,1.12	0.756	0.982	NA		1.00	0.2383
IL-6	Ovarian (mucinous, borderline & invasive)	1	1.20,0.45,3.19	0.714	0.974719												0.07	0.0018
TRAIL	Endometrial (overall)	42	1.04,0.86,1.25	0.716	0.974719	0.134	0.87,0.64,1.20	0.407	0.196	1.01,0.85,1.19	0.916	1.03,0.81,1.30	0.836	0.183	NA		0.81	0.018
IL-6	Breast (luminal B, HER2 neg.)	1	0.91,0.56,1.49	0.717	0.974719												0.16	0.0018
IL-16	Ovarian (serous, invasive LG)	17	1.07,0.76,1.50	0.717	0.974719	0.444	1.11,0.71,1.75	0.646	0.767	1.10,0.77,1.58	0.608	1.06,0.71,1.58	0.770	0.551	NA		0.22	0.0351
IL-6	Breast (HER2 enriched)	1	0.86,0.37,1.98	0.719	0.974719												0.13	0.0018
MIF	Lung (small cell)	2	0.94,0.65,1.34	0.719	0.974719	0.282											0.26	0.019
PDGFbb	Endometrial (non-endometrioid)	1	0.69,0.09,5.25	0.722	0.974719												0.06	0.001
activePAI	Endometrial (endometrioid)	1	0.91,0.56,1.50	0.722	0.974719												0.15	0.0031
TNF-A	Breast (luminal B)	2	1.12,0.59,2.14	0.722	0.974719	0.080											0.32	0.0044
IL-8	Endometrial (overall)	1	0.94,0.66,1.33	0.722	0.974719												0.29	0.0045
MIG	Lung (squamous cell)	1	1.05,0.81,1.36	0.722	0.974719												0.39	0.0111
MIG	Prostate (high vs low risk)	1	1.05,0.80,1.39	0.723	0.974719												0.31	0.0111
MCP3	Prostate (advanced)	9	0.99,0.95,1.04	0.724	0.974719	0.882	1.01,0.92,1.11	0.857	0.707	0.99,0.94,1.06	0.630	1.00,0.94,1.05	0.933	0.883	NA		1.00	0.219
MCSF	Prostate (high vs low+int risk)	11	1.02,0.93,1.11	0.726	0.974719	0.598	1.19,0.93,1.53	0.160	0.171	1.01,0.91,1.13	0.864	1.01,0.90,1.13	0.901	0.660	NA		1.00	0.0457
CTACK	Ovarian (serous, invasive HG)	3	1.02,0.92,1.12	0.726	0.974719	0.855	1.08,0.85,1.37	0.516	0.579	1.01,0.68,1.43	0.729	1.01,0.91,1.12	0.829				1.00	0.0601
GROa	Ovarian (mucinous, borderline)	11	0.98,0.87,1.10	0.726	0.974719	0.566	0.97,0.82,1.16	0.755	0.920	0.85,0.69,1.54	0.095	0.86,0.72,1.03	0.097	0.120	NA		0.93	0.2724
GROa	Prostate (advanced)	11	0.99,0.95,1.04	0.728	0.974899	0.232	0.99,0.92,1.06	0.719	0.854	0.99,0.95,1.02	0.470	1.00,0.95,1.04	0.830	0.345	NA		1.00	0.2724
MIP1b	Endometrial (endometrioid)	21	0.98,0.89,1.09	0.731	0.974899	0.075	0.91,0.77,1.08	0.270	0.265	1.26,0.83,1.57	0.058	0.92,0.82,1.03	0.133	0.015	No significant outliers		1.00	0.1345
GROa	Ovarian (overall, MA incl. CIMBA)	11	1.01,0.97,1.04	0.731	0.974899	0.631	1.02,0.97,1.06	0.509	0.561	1.01,0.99,1.04	0.599	1.01,0.97,1.04	0.687	0.755	NA		1.00	0.2724
CTACK	Breast (luminal A)	3	0.99,0.95,1.04	0.733	0.974899	0.528	0.98,0.86,1.11	0.713	0.793	0.99,0.76,1.10	0.733	0.99,0.94,1.05	0.841				1.00	0.0601
MIP1b	Lung (small cell)	21	1.02,0.89,1.17	0.734	0.974899	0.545	1.06,0.85,1.32	0.585	0.670	0.98,0.71,1.15	0.865	1.09,0.92,1.30	0.324	0.548	NA		0.92	0.1261
IL-18	Lung (small cell)	5	1.03,0.86,1.24	0.737	0.974899	0.397	1.20,0.62,2.30	0.585	0.635	1.10, NA, NA	0.367	1.05,0.84,1.31	0.653	0.522	NA		0.57	0.0506
SCF	Ovarian (overall, MA incl. CIMBA)	2	0.95,0.72,1.27	0.739	0.974899	0.487											0.35	0.0036
IL-8	Ovarian (serous, MA incl. CIMBA)	1	1.05,0.79,1.40	0.739	0.974899												0.32	0.0045
IL-18	Ovarian (mucinous, borderline & invasive)	5	0.96,0.78,1.19	0.74	0.974899	0.245	1.55,0.87,2.78	0.139	0.092	0.72,0.49,1.25	0.195	1.10,0.88,1.39	0.397	0.149	NA		0.59	0.0506
IL-18	Ovarian Serous (invasive LG & HG)	5	0.98,0.90,1.08	0.74	0.974899	0.698	0.97,0.72,1.31	0.858	0.937	1.01, NA, NA	1.000	0.99,0.89,1.11	0.922	0.801	NA		0.99	0.0506
sVCAM	Lung (small cell)	1	1.13,0.55,2.30	0.743	0.974899												0.08	0.003
IL-7	Prostate (high vs low risk)	1	0.93,0.61,1.43	0.744	0.974899												0.16	0.0047
GROa	Ovarian (serous, MA incl. CIMBA)	11	1.01,0.97,1.04	0.744	0.974899	0.686	1.03,0.98,1.09	0.246	0.201	1.01,0.98,1.04	0.595	1.00,0.96,1.04	0.982	0.742	NA		1.00	0.2724
IL12p70	Breast (luminal B, HER2 neg.)	1	1.07,0.70,1.64	0.745	0.974899												0.14	0.0015
IL-18	Breast (luminal B)	5	1.02,0.91,1.13	0.745	0.974899	0.675	1.26,0.89,1.78	0.190	0.204	1.05,0.59,1.14	0.453	1.04,0.91,1.18	0.585	0.612	NA		1.00	0.0506
IL-18	Ovarian (serous, invasive LG)	5	0.95,0.71,1.27	0.745	0.974899	0.785	0.75,0.30,1.90	0.548	0.599	0.89,0.39,2.46	0.716	0.93,0.66,1.32	0.689	0.816	NA		0.29	0.0506
MIP1b	Ovarian (endometrioid, invasive)	21	1.03,0.87,1.22	0.745	0.974899	0.023	1.03,0.76,1.39	0.849	0.996	0.91,0.66,1.06	0.235	0.98,0.82,1.16	0.778	0.032	1 outlier(s)	0.98,0.84,1.14	0.96	0.1345
IL-6	Prostate (advanced)	1	1.08,0.68,1.70	0.746	0.974899												0.15	0.0018
GROa	Lung (adenocarcinoma)	9	0.99,0.94,1.04	0.746	0.974899	0.258	0.97,0.90,1.05	0.486	0.510	0.99,0.95,1.03	0.694	0.99,0.94,1.04	0.701	0.430	NA		1.00	0.2578
Eotaxin	Lung (adenocarcinoma)	2	1.05,0.77,1.43	0.747	0.974899	0.921											0.29	0.0056
IL-18	Breast (overall)	5	1.01,0.97,1.05	0.748	0.974899	0.288	1.10,0.98,1.24	0.105	0.112	1.02,0.86,1.02	0.380	1.02,0.97,1.06	0.448	0.284	NA		1.00	0.0506
VEGF	Endometrial (endometrioid)	21	1.02,0.92,1.13	0.748	0.974899	0.693	1.06,0.89,1.25	0.527	0.582	0.98,0.69,1.18	0.839	1.04,0.91,1.19	0.553	0.647	NA		0.99	0.0725
IL-18	Ovarian (mucinous, invasive)	5	0.96,0.72,1.26	0.749	0.974899	0.248	1.66,0.74,3.70	0.218	0.157	0.67,0.32,1.46	0.616	1.16,0.86,1.56	0.344	0.186	NA		0.38	0.0506
IL-8	Lung (overall)	1	1.05,0.79,1.38	0.75	0.974899												0.42	0.0045
IL-7	Breast (HER2 enriched)	1	1.09,0.63,1.88	0.75	0.974899												0.26	0.0047
TRAIL	Lung (ever smokers)	36	0.97,0.82,1.16	0.75	0.974899	0.436	0.81,0.59,1.12	0.210	0.200	0.97,0.80,1.16	0.693	1.01,0.80,1.27	0.952	0.480	NA		0.63	0.0166
IL-8	Breast (luminal B)	1	1.07,0.72,1.58	0.753	0.976073												0.33	0.0045
IP-10	Ovarian (mucinous, invasive)	4	1.11,0.57,2.20	0.753	0.976073	0.151	1.91,0.10,37.73	0.671	0.714			1.02,0.55,1.90	0.945	0.166	NA		0.13	0.0131
MCP1	Ovarian (mucinous, borderline & invasive)	25	0.90,0.45,1.78	0.754	0.976073	0.806	4.00,1.20,13.35	0.024	0.003	0.90,0.30,1.77	0.754	1.48,0.55,3.98	0.436	0.502	NA		0.10	0.0043
MCP3	Lung (adenocarcinoma)	8	1.01,0.96,1.06	0.754	0.976073	0.980	0.99,0.87,1.13	0.871	0.756	1.00,0.95,1.10	0.794	1.00,0.94,1.06	0.993	0.983	NA		1.00	0.2114
HGF	Breast (HER2 enriched)	6	0.95,0.66,1.35	0.759	0.980647	0.597	0.80,0.52,1.21	0.290	0.132			0.94,0.65,1.36	0.732	0.173	NA		0.47	0.0097
PDGFbb	Ovarian (serous, invasive HG)	1	0.89,0.43,1.86	0.761	0.980647												0.09	0.001
IP-10	Prostate (high vs low risk)	4	1.04,0.80,1.36	0.761	0.980647	0.408	1.49,0.50,4.45	0.475	0.507			1.07,0.78,1.47	0.690	0.440	NA		0.35	0.0131
IL-16	Ovarian (serous, invasive HG)	17	1.02,0.91,1.14	0.761	0.980647	0.745	0.99,0.86,1.15	0.939	0.623	0.98,0.85,1.52	0.792	0.98,0.86,1.13	0.809	0.555	NA		0.95	0.0351
IL-1ra	Ovarian (overall, MA incl. CIMBA)	18	1.01,0.93,1.10	0.761	0.980647	0.013	1.07,0.89,1.28	0.463	0.501	0.84, NA, NA	0.023	1.07,0.98,1.17	0.133	0.011	No significant outliers		1.00	0.0754
activePAI	Breast (luminal A)	1	1.04,0.83,1.30	0.762	0.9808												0.52	0.0031
CTACK	Breast (triple negative)	3	0.99,0.90,1.08	0.77	0.982871	0.389	0.86,0.68,1.07	0.175	0.175	0.95,0.73,1.49	0.541	1.00,0.90,1.10	0.935				0.99	0.0601
MCP1	Breast (HER2 enriched)	25	1.10,0.57,2.13	0.771	0.982871	0.190	1.20,0.38,3.79	0.761	0.864	1.14,0.63,2.32	0.677	1.41,0.61,3.25	0.424	0.216	NA		0.24	0.0043
MIP1b	Ovarian (serous, invasive HG)	21	0.99,0.92,1.07	0.771	0.982871	0.360	0.92,0.82,1.05	0.217	0.189	0.97,0.91,1.06	0.569	0.96,0.87,1.06	0.404	0.410	NA		1.00	0.1345
MIP1a	Endometrial (non-endometrioid)	24	0.97,0.82,1.16	0.771	0.982871	0.758	0.99,0.70,1.41	0.960	0.912	0.97,0.73,1.19	0.769	1.02,0.80,1.30	0.869	0.797	NA		0.82	0.1764
TNF-A	Ovarian (mucinous, invasive)	2	0.88,0.37,2.08	0.773	0.982998	0.683											0.08	0.0044
IL-1ra	Lung (adenocarcinoma)	16	1.01,0.93,1.10	0.775	0.984205	0.672	1.00,0.83,1.19	0.970	0.842	1.07,0.91,1.24	0.200	0.99,0.88,1.12	0.873	0.638	NA		1.00	0.07
IL-8	Breast (luminal B, HER2 neg.)	1	0.95,0.68,1.33	0.777	0.984205												0.33	0.0045
sICAM	Endometrial (overall)	22	1.01,0.94,1.09	0.78	0.986132	0.091	0.95,0.79,1.15	0.600	0.491	1.04,0.97,1.14	0.249	1.03,0.94,1.12	0.565	0.067	NA		1.00	0.1468
IL12p70	Ovarian (serous, borderline & invasive LG)	1	1.12,0.51,2.42	0.782	0.986132												0.12	0.0015
SeSelectin	Lung (small cell)	2	0.93,0.58,1.51	0.782	0.986132	0.751											0.14	0.0079
IL12p70	Breast (HER2 enriched)	1	1.11,0.54,2.26	0.783	0.986132												0.12	0.0015
IL-1ra	Ovarian (serous, invasive HG)	18	1.01,0.92,1.12	0.784	0.986132	0.149	1.05,0.85,1.29	0.675	0.739	0.95,0.76,1.14	0.521	1.03,0.91,1.16	0.672	0.129	NA		1.00	0.0754
GROa	Endometrial (overall)	11	0.99,0.95,1.04	0.784	0.986132	0.184	1.02,0.95,1.09	0.662	0.397	0.99,0.95,1.03	0.630	0.99,0.94,1.04	0.641	0.283	NA		1.00	0.2724
activePAI	Ovarian (clearcell, invasive)	1	0.86,0.29,2.56	0.785	0.986132												0.07	0.0031
SCF	Endometrial (overall)	2	1.06,0.70,1.59	0.785	0.986132	0.274											0.24	0.0036
Eotaxin	Ovarian (serous, borderline)	2	0.91,0.47,1.77	0.785	0.986132	0.942											0.10	0.0056
IL-18	Ovarian (serous, invasive HG)	5	0.99,0.90,1.09	0.786	0.986132	0.742	1.00,0.74,1.36	0.989	0.918	1.01,0.80,1.13	0.982	1.00,0.90,1.13	0.937	0.816	NA		0.99	0.0506
IL-16	Prostate (advanced)	17	1.01,0.91,1.13	0.787	0.986132	0.914	1.03,0.90,1.18	0.675	0.740	1.01,0.91,1.13	0.808	1.01,0.89,1.14	0.883	0.947	NA		0.98	0.0351
sICAM	Endometrial (non-endometrioid)	22	1.02,0.86,1.22	0.789	0.986132	0.709	0.75,0.48,1.18	0.210	0.140	1.14,0.91,1.39	0.242	1.06,0.83,1.36	0.628	0.681	NA		0.75	0.1468
TRAIL	Breast (luminal B, HER2 neg.)	43	0.98,0.83,1.15	0.79	0.986132	0.602	1.09,0.83,1.45	0.533	0.333	0.96,0.81,1.16	0.748	0.90,0.72,1.14	0.393	0.655	NA		0.87	0.0183
IL-18	Breast (luminal B, HER2 neg.)	5	1.02,0.90,1.15	0.791	0.986132	0.140	1.14,0.74,1.74	0.554	0.586	1.08,0.72,1.19	0.498	1.02,0.91,1.15	0.694	0.203	NA		1.00	0.0506
sVCAM	Ovarian (overall, invasive)	1	0.96,0.70,1.32	0.792	0.986132												0.24	0.003
MIF	Lung (ever smokers)	2	0.96,0.70,1.31	0.792	0.986132	0.061											0.69	0.019
TNF-A	Lung (adenocarcinoma)	1	0.94,0.62,1.44	0.793	0.986132												0.17	0.0028
MCP1	Prostate (overall)	24	1.03,0.85,1.25	0.793	0.986132	0.571	1.27,0.91,1.77	0.158	0.122	1.09,0.90,1.36	0.352	1.13,0.86,1.48	0.376	0.545	NA		0.57	0.0041
Eotaxin	Ovarian (overall, invasive)	2	0.97,0.75,1.25	0.797	0.986132	0.308											0.39	0.0056
PDGFbb	Ovarian (overall, invasive)	1	0.92,0.50,1.71	0.799	0.986132												0.11	0.001
MIP1b	Ovarian (mucinous, invasive)	21	1.03,0.85,1.24	0.799	0.986132	0.308	1.04,0.74,1.45	0.825	0.925	0.98,0.77,1.18	0.805	1.00,0.79,1.27	0.984	0.383	NA		0.77	0.1345
IL-18	Ovarian (clearcell, invasive)	5	0.97,0.76,1.24	0.8	0.986132	0.858	0.91,0.42,1.99	0.822	0.878	0.97,0.34,1.61	0.802	0.95,0.71,1.26	0.704	0.882	NA		0.37	0.0506
SCF	Ovarian (mucinous, invasive)	2	0.83,0.20,3.47	0.801	0.986132	0.130											0.07	0.0036
IL-1ra	Ovarian (endometrioid, invasive)	18	0.98,0.84,1.14	0.801	0.986132	0.751	1.03,0.75,1.42	0.840	0.714	1.00,0.81,1.21	0.977	0.97,0.79,1.19	0.735	0.728	NA		0.80	0.0754
sICAM	Ovarian (borderline)	22	1.02,0.90,1.15	0.801	0.986132	0.232	0.94,0.68,1.30	0.702	0.602	0.87,0.74,1.03	0.074	0.95,0.80,1.13	0.588	0.227	NA		0.98	0.1468
IL-6	Ovarian (mucinous, invasive)	1	1.18,0.32,4.31	0.802	0.986132												0.06	0.0018
activePAI	Lung (ever smokers)	1	0.95,0.64,1.42	0.802	0.986132												0.17	0.0031
TNF-A	Endometrial (endometrioid)	2	0.95,0.64,1.41	0.802	0.986132	0.448											0.20	0.0044
MIF	Prostate (advanced)	2	1.02,0.88,1.18	0.802	0.986132	0.944											0.83	0.019
Eotaxin	Endometrial (overall)	2	1.04,0.78,1.39	0.803	0.986132	0.894											0.35	0.0056
MCP3	Ovarian (overall, invasive)	10	1.01,0.96,1.05	0.804	0.986132	0.307	0.97,0.87,1.07	0.518	0.404	1.00,0.94,1.14	1.000	0.98,0.93,1.03	0.453	0.310	NA		1.00	0.2464
CTACK	Ovarian (overall, invasive)	3	1.01,0.93,1.09	0.806	0.986132	0.791	1.01,0.83,1.23	0.935	0.984	1.01,0.81,1.52	0.807	1.00,0.92,1.09	0.913				1.00	0.0601
VEGF	Breast (luminal A)	21	1.01,0.96,1.06	0.806	0.986132	0.703	1.06,0.98,1.14	0.158	0.111	0.99,0.95,1.05	1.000	1.00,0.94,1.07	0.934	0.766	NA		1.00	0.0725
sICAM	Ovarian (endometrioid, invasive)	22	0.99,0.88,1.11	0.808	0.986409	0.480	0.90,0.67,1.20	0.460	0.484	1.04,0.89,1.21	0.590	1.01,0.86,1.18	0.914	0.493	NA		0.97	0.1468
MCP3	Ovarian (clearcell, invasive)	10	0.99,0.87,1.11	0.808	0.986409	0.580	0.99,0.75,1.30	0.924	0.991	0.93,0.79,1.07	0.375	0.94,0.80,1.10	0.434	0.638	NA		0.95	0.2464
SeSelectin	Prostate (overall)	2	0.98,0.87,1.12	0.809	0.986409	0.603											0.85	0.0079
SeSelectin	Lung (overall)	2	1.02,0.85,1.24	0.81	0.986409	0.426											0.64	0.0079
PDGFbb	Breast (triple negative)	1	0.92,0.45,1.87	0.817	0.988895												0.09	0.001
IL12p70	Ovarian (borderline)	1	0.91,0.43,1.95	0.817	0.988895												0.07	0.0015
CTACK	Prostate (high vs low risk)	3	0.99,0.88,1.11	0.817	0.988895	0.820	1.04,0.78,1.39	0.801	0.704	0.98,0.66,1.69	0.821	0.99,0.87,1.12	0.831				0.92	0.0601
IP-10	Lung (small cell)	4	1.05,0.69,1.60	0.818	0.988895	0.329	1.30,0.19,9.00	0.789	0.822			1.10,0.68,1.76	0.700	0.339	NA		0.19	0.0131
MCSF	Lung (overall)	9	0.99,0.91,1.08	0.819	0.988895	0.839	1.03,0.83,1.29	0.772	0.685	0.99,0.80,1.25	0.821	1.00,0.90,1.12	1.000	0.815	NA		1.00	0.0411
MIP1a	Lung (overall)	22	1.01,0.96,1.05	0.821	0.989134	0.648	0.98,0.90,1.08	0.713	0.573	1.00,0.94,1.05	0.815	1.00,0.94,1.06	0.991	0.704	NA		1.00	0.1592
CTACK	Ovarian Serous (invasive LG & HG)	3	1.01,0.92,1.11	0.823	0.989379	0.840	1.07,0.85,1.34	0.579	0.612	1.01,0.71,1.46	0.825	1.03,0.93,1.13	0.596				1.00	0.0601
sICAM	Ovarian (serous, borderline)	22	1.02,0.88,1.18	0.825	0.989379	0.300	0.91,0.62,1.33	0.619	0.525	0.87,0.72,1.07	0.161	0.91,0.74,1.12	0.378	0.311	NA		0.91	0.1468
Eotaxin	Lung (ever smokers)	2	1.05,0.67,1.64	0.826	0.989379	0.117											0.26	0.0055
SCF	Ovarian (borderline)	2	1.13,0.36,3.54	0.828	0.989379	0.098											0.10	0.0036
IL12p70	Ovarian (clearcell, invasive)	1	0.89,0.30,2.61	0.829	0.989379												0.06	0.0015
IL-16	Prostate (high vs low risk)	17	0.98,0.84,1.15	0.829	0.989379	0.418	0.98,0.80,1.21	0.887	0.976	1.01,0.84,1.18	0.923	0.99,0.82,1.18	0.899	0.525	NA		0.74	0.0351
MIG	Ovarian (serous, MA incl. CIMBA)	1	1.02,0.85,1.22	0.83	0.989379												0.66	0.0111
activePAI	Breast (triple negative)	1	0.95,0.62,1.47	0.831	0.989379												0.16	0.0031
PDGFbb	Ovarian (mucinous, invasive)	1	1.22,0.19,7.70	0.832	0.989379												0.06	0.001
IL-2ra	Ovarian (borderline)	11	1.01,0.92,1.12	0.834	0.989379	0.664	0.93,0.79,1.10	0.395	0.228	0.99,0.89,1.35	0.918	0.95,0.84,1.08	0.420	0.538	NA		1.00	0.2326
MCP1	Breast (luminal B, HER2 neg.)	25	1.04,0.70,1.56	0.835	0.989379	0.126	1.75,0.91,3.38	0.095	0.058	1.38,0.74,2.02	0.125	1.61,0.93,2.76	0.086	0.026	1 outlier(s)	1.13,0.79,1.60	0.32	0.0043
GROa	Ovarian (mucinous, borderline & invasive)	11	1.01,0.93,1.09	0.835	0.989379	0.500	0.99,0.87,1.11	0.806	0.599	1.02,0.88,1.24	0.700	0.94,0.85,1.05	0.312	0.259	NA		1.00	0.2724
MIG	Breast (HER2 enriched)	1	0.96,0.68,1.37	0.836	0.989379												0.52	0.0111
IL-7	Lung (overall)	1	0.97,0.76,1.25	0.837	0.989379												0.43	0.0047
IP-10	Ovarian (mucinous, borderline & invasive)	4	0.94,0.53,1.68	0.838	0.989379	0.085	1.63,0.13,20.20	0.705	0.659			0.90,0.56,1.46	0.674	0.093	NA		0.20	0.0131
MCP3	Breast (triple negative)	10	1.00,0.95,1.04	0.838	0.989379	0.672	1.04,0.94,1.16	0.461	0.359	0.98,0.88,1.05	0.462	0.99,0.94,1.05	0.823	0.658	NA		1.00	0.2464
Eotaxin	Ovarian (serous, invasive HG)	2	1.03,0.76,1.39	0.841	0.989379	0.453											0.30	0.0056
SeSelectin	Lung (squamous cell)	2	0.97,0.72,1.31	0.841	0.989379	0.574											0.29	0.0079
SCGFb	Prostate (high vs low risk)	2	0.95,0.58,1.56	0.841	0.989379	0.026											0.42	0.0161
CTACK	Breast (luminal B)	3	1.01,0.91,1.13	0.841	0.989379	0.834	1.00,0.77,1.30	0.985	0.912	1.01,0.60,1.38	0.850	1.02,0.91,1.14	0.791				1.00	0.0601
IL-6	Ovarian (borderline)	1	1.10,0.44,2.76	0.842	0.989379												0.07	0.0018
IP-10	Ovarian (serous, borderline & invasive LG)	4	0.96,0.66,1.40	0.842	0.989379	0.600	1.19,0.30,4.83	0.804	0.754			0.98,0.63,1.54	0.944	0.613	NA		0.63	0.0131
HGF	Ovarian (endometrioid, invasive)	6	1.04,0.70,1.55	0.843	0.989379	0.657	0.91,0.57,1.45	0.679	0.268			1.03,0.68,1.56	0.877	0.104	NA		0.17	0.0097
MIG	Breast (luminal A)	1	0.99,0.89,1.10	0.845	0.98968												0.97	0.0111
sICAM	Lung (never smokers)	22	0.99,0.86,1.14	0.845	0.98968	0.867	1.12,0.79,1.61	0.520	0.433	0.99,0.79,1.27	0.874	1.03,0.85,1.25	0.777	0.888	NA		0.87	0.1469
RANTES	Endometrial (endometrioid)	1	1.03,0.78,1.35	0.848	0.990264												0.36	0.0091
IL-18	Ovarian (serous, borderline & invasive LG)	5	0.98,0.83,1.17	0.849	0.990264	0.861	0.80,0.46,1.40	0.432	0.445	0.99,0.63,1.87	0.850	1.01,0.82,1.24	0.956	0.826	NA		0.99	0.0506
HGF	Ovarian (mucinous, invasive)	6	1.06,0.59,1.90	0.85	0.990264	0.356	0.96,0.46,2.04	0.924	0.643			1.05,0.59,1.87	0.861	0.700	NA		0.11	0.0097
sICAM	Ovarian Serous (invasive LG & HG)	22	0.99,0.93,1.06	0.851	0.990264	0.986	1.09,0.94,1.28	0.257	0.189	1.01,0.92,1.07	0.785	1.01,0.93,1.09	0.853	0.981	NA		1.00	0.1468
MIG	Lung (never smokers)	1	0.95,0.59,1.55	0.852	0.990264												0.14	0.0111
SCF	Ovarian (overall, invasive)	2	1.04,0.69,1.57	0.853	0.990264	0.196											0.27	0.0036
SCGFb	Breast (luminal B, HER2 neg.)	2	1.03,0.74,1.43	0.853	0.990264	0.047											0.82	0.0161
IL-8	Lung (small cell)	1	1.07,0.52,2.19	0.856	0.990264												0.10	0.0045
SCGFb	Prostate (high vs low+int risk)	2	0.97,0.72,1.31	0.857	0.990264	0.036											0.79	0.0161
MIG	Prostate (advanced)	1	1.02,0.84,1.23	0.858	0.990264												0.61	0.0111
MIP1b	Ovarian (serous, borderline & invasive LG)	21	0.99,0.87,1.13	0.858	0.990264	0.812	0.96,0.77,1.19	0.687	0.712	0.98,0.82,1.54	0.808	1.00,0.84,1.19	0.982	0.699	NA		1.00	0.1345
activePAI	Ovarian (overall, invasive)	1	0.97,0.67,1.39	0.859	0.990264												0.24	0.0031
TRAIL	Prostate (high vs low+int risk)	38	0.99,0.85,1.14	0.859	0.990264	0.443	0.94,0.73,1.22	0.652	0.668	0.95,0.81,1.10	0.471	0.95,0.77,1.17	0.626	0.440	NA		0.83	0.0178
HGF	Breast (luminal A)	6	0.98,0.83,1.17	0.86	0.990264	0.039	1.03,0.84,1.27	0.758	0.392	0.88, NA, NA	1.000	0.99,0.88,1.11	0.846	0.051	NA		0.94	0.0097
SCGFb	Endometrial (endometrioid)	2	1.04,0.70,1.54	0.86	0.990264	0.050											0.56	0.0161
PDGFbb	Lung (small cell)	1	1.13,0.28,4.57	0.861	0.990264												0.06	0.001
PDGFbb	Prostate (advanced)	1	0.94,0.49,1.80	0.861	0.990264												0.10	0.001
sVCAM	Lung (never smokers)	1	0.93,0.39,2.20	0.861	0.990264												0.07	0.003
MCP1	Prostate (advanced)	24	0.96,0.61,1.52	0.861	0.990264	0.005	0.72,0.32,1.59	0.412	0.377	0.86,0.56,4.81	0.417	0.78,0.48,1.27	0.314	0.005	No significant outliers		0.27	0.0041
CTACK	Ovarian (mucinous, invasive)	3	0.98,0.77,1.24	0.862	0.990264	0.669	0.97,0.54,1.75	0.927	0.982	0.97,0.27,1.71	0.865	1.00,0.77,1.29	0.988				0.44	0.0601
SeSelectin	Lung (never smokers)	2	0.95,0.54,1.69	0.866	0.99265	0.356											0.11	0.0079
IL-7	Prostate (high vs low+int risk)	1	1.02,0.78,1.35	0.868	0.992951												0.32	0.0047
SCF	Ovarian (serous, MA incl. CIMBA)	2	1.03,0.75,1.41	0.869	0.992951	0.436											0.27	0.0036
SeSelectin	Ovarian (mucinous, borderline)	2	0.94,0.46,1.94	0.871	0.992951	0.530											0.09	0.0079
RANTES	Ovarian (endometrioid, invasive)	1	0.96,0.62,1.50	0.871	0.992951												0.16	0.0091
CTACK	Ovarian (mucinous, borderline & invasive)	3	1.02,0.85,1.22	0.872	0.992951	0.776	1.02,0.65,1.60	0.926	0.976	1.01,0.40,1.64	0.874	1.03,0.85,1.25	0.777				0.66	0.0601
IL12p70	Endometrial (non-endometrioid)	1	1.10,0.33,3.63	0.873	0.992951												0.06	0.0015
MCP3	Ovarian (serous, borderline & invasive LG)	10	1.01,0.91,1.12	0.873	0.992951	0.184	0.90,0.71,1.14	0.377	0.291	0.99,0.88,1.09	0.721	0.98,0.88,1.10	0.769	0.246	NA		1.00	0.2464
sICAM	Ovarian (serous, invasive HG)	22	1.01,0.94,1.07	0.874	0.992951	0.960	1.07,0.91,1.26	0.393	0.389	1.02,0.95,1.10	0.616	1.02,0.94,1.11	0.644	0.957	NA		1.00	0.1468
TRAIL	Ovarian (overall, invasive)	43	1.01,0.87,1.18	0.875	0.992951	0.239	1.03,0.79,1.34	0.839	0.890	0.99,0.85,1.16	0.918	1.00,0.81,1.25	0.964	0.291	NA		0.86	0.0183
IL-16	Prostate (high vs low+int risk)	17	1.01,0.91,1.11	0.877	0.992951	0.703	0.99,0.87,1.12	0.859	0.642	1.00,0.91,1.12	1.000	1.00,0.89,1.12	0.935	0.766	NA		0.98	0.0351
TRAIL	Ovarian (borderline)	43	1.03,0.72,1.47	0.88	0.992951	0.086	1.09,0.59,2.01	0.778	0.810	0.94,0.68,1.32	0.689	0.97,0.63,1.50	0.907	0.131	NA		0.30	0.0183
IL-2ra	Breast (luminal A)	10	1.00,0.97,1.03	0.881	0.992951	0.292	0.97,0.92,1.02	0.292	0.235	0.99,0.96,1.05	0.613	1.00,0.96,1.03	0.795	0.353	NA		1.00	0.1787
IL-6	Ovarian (mucinous, borderline)	1	1.11,0.26,4.69	0.882	0.992951												0.06	0.0018
IL12p70	Ovarian (mucinous, borderline)	1	1.09,0.34,3.55	0.883	0.992951												0.06	0.0015
VEGF	Ovarian (overall, invasive)	21	1.01,0.93,1.09	0.884	0.992951	0.630	0.94,0.83,1.07	0.353	0.197	1.00,0.90,1.21	0.908	0.98,0.89,1.08	0.631	0.635	NA		1.00	0.0725
activePAI	Endometrial (non-endometrioid)	1	0.91,0.27,3.11	0.885	0.992951												0.07	0.0031
IL-7	Ovarian (overall, MA incl. CIMBA)	1	1.02,0.79,1.31	0.885	0.992951												0.44	0.0047
IL-18	Endometrial (overall)	5	1.01,0.92,1.10	0.885	0.992951	0.650	1.12,0.83,1.50	0.460	0.465	1.01,0.65,1.16	0.885	1.01,0.90,1.13	0.845	0.696	NA		1.00	0.0506
sVCAM	Ovarian (serous, borderline)	1	0.94,0.41,2.18	0.886	0.992951												0.08	0.003
sICAM	Ovarian (mucinous, borderline)	22	1.01,0.85,1.21	0.886	0.992951	0.600	0.97,0.61,1.53	0.892	0.834	1.10,0.85,1.50	0.407	1.15,0.90,1.48	0.269	0.604	NA		0.72	0.1468
IL-18	Ovarian (borderline)	5	0.99,0.83,1.17	0.888	0.994568	0.999	1.04,0.60,1.79	0.898	0.856	0.98,0.57,1.67	0.897	1.00,0.82,1.22	0.972	0.999	NA		0.66	0.0506
IP-10	Breast (luminal A)	4	1.01,0.91,1.12	0.89	0.994568	0.793	0.85,0.57,1.25	0.407	0.369			1.01,0.90,1.14	0.840	0.805	NA		0.98	0.0131
IL-6	Ovarian (serous, borderline)	1	1.08,0.35,3.36	0.891	0.994568												0.07	0.0018
IL-16	Breast (triple negative)	17	1.01,0.90,1.13	0.892	0.994568	0.974	0.99,0.85,1.15	0.855	0.654	0.98,0.84,1.19	0.799	1.01,0.88,1.16	0.904	0.981	NA		0.90	0.0351
IL-7	Lung (adenocarcinoma)	1	1.02,0.73,1.44	0.893	0.994568												0.25	0.0047
CTACK	Breast (HER2 enriched)	3	0.99,0.85,1.15	0.893	0.994568	0.868	0.90,0.62,1.32	0.589	0.595	0.99,0.58,1.96	0.895	0.99,0.84,1.17	0.905				1.00	0.0601
MIP1a	Lung (never smokers)	19	1.01,0.86,1.19	0.894	0.994568	0.219	0.87,0.63,1.20	0.392	0.286	1.05,0.89,1.34	0.609	0.98,0.81,1.18	0.834	0.303	NA		0.88	0.1517
SeSelectin	Endometrial (overall)	2	0.98,0.77,1.26	0.895	0.994568	0.558											0.47	0.0079
sVCAM	Breast (HER2 enriched)	1	1.04,0.56,1.93	0.898	0.994568												0.18	0.003
IL-2ra	Prostate (overall)	11	1.00,0.97,1.03	0.899	0.994568	0.801	0.98,0.93,1.02	0.327	0.193	1.00,0.97,1.07	0.816	0.99,0.95,1.03	0.551	0.803	NA		1.00	0.2326
IL12p70	Breast (luminal B)	1	1.03,0.63,1.69	0.9	0.994568												0.14	0.0015
IL-1ra	Lung (never smokers)	18	0.99,0.80,1.22	0.9	0.994568	0.177	1.59,1.08,2.35	0.019	0.006	0.63,0.44,1.27	0.091	1.22,0.94,1.59	0.128	0.138	NA		0.61	0.0754
SCF	Prostate (high vs low risk)	2	0.96,0.48,1.92	0.901	0.994568	0.180											0.13	0.0033
HGF	Ovarian (mucinous, borderline & invasive)	6	0.96,0.52,1.78	0.901	0.994568	0.052	0.94,0.42,2.11	0.879	0.913	0.62,0.53,0.62	1.000	0.96,0.62,1.47	0.849	0.756	NA		0.16	0.0097
IP-10	Ovarian (overall, MA incl. CIMBA)	4	0.98,0.77,1.26	0.903	0.994568	0.052	1.07,0.35,3.26	0.907	0.881			1.01,0.82,1.23	0.934	0.052	NA		0.85	0.0131
activePAI	Ovarian (endometrioid, invasive)	1	1.05,0.48,2.30	0.904	0.994568												0.09	0.0031
IL-8	Endometrial (endometrioid)	1	0.98,0.65,1.47	0.904	0.994568												0.20	0.0045
MIF	Endometrial (overall)	2	0.99,0.80,1.22	0.905	0.994568	0.208											0.83	0.019
PDGFbb	Ovarian (serous, invasive LG)	1	1.14,0.12,10.62	0.906	0.994568												0.05	0.001
MIP1b	Lung (adenocarcinoma)	19	1.00,0.93,1.08	0.906	0.994568	0.654	1.05,0.93,1.19	0.436	0.372	0.99,0.83,1.10	0.751	1.04,0.95,1.15	0.414	0.618	NA		1.00	0.1248
IL-6	Ovarian Serous (invasive LG & HG)	1	1.03,0.63,1.69	0.91	0.995659												0.13	0.0018
sICAM	Ovarian (overall, MA incl. CIMBA)	22	1.00,0.96,1.05	0.91	0.995659	0.889	1.06,0.94,1.19	0.355	0.339	1.02,0.92,1.10	0.535	1.01,0.95,1.08	0.735	0.891	NA		1.00	0.1468
MCP1	Lung (small cell)	17	1.05,0.42,2.66	0.911	0.995659	0.513	1.78,0.29,10.86	0.532	0.509	0.94,0.36,2.83	0.907	1.01,0.29,3.53	0.985	0.628	NA		0.08	0.0025
Eotaxin	Ovarian (mucinous, borderline & invasive)	2	0.94,0.31,2.81	0.911	0.995659	0.057											0.11	0.0056
GROa	Ovarian (overall, invasive)	11	1.00,0.97,1.04	0.911	0.995659	0.465	1.01,0.96,1.07	0.706	0.679	1.01,0.97,1.04	0.806	1.00,0.96,1.05	0.836	0.607	NA		1.00	0.2724
RANTES	Ovarian (serous, borderline & invasive LG)	1	0.98,0.63,1.52	0.912	0.995659												0.48	0.0091
TRAIL	Endometrial (non-endometrioid)	41	1.03,0.62,1.70	0.913	0.995659	0.335	0.77,0.33,1.80	0.550	0.409	0.89,0.53,1.51	0.667	0.73,0.36,1.46	0.372	0.354	NA		0.15	0.0178
MIF	Breast (luminal B)	2	0.99,0.82,1.20	0.916	0.995659	0.531											0.88	0.019
IL-7	Ovarian (overall, invasive)	1	0.99,0.74,1.30	0.917	0.995659												0.34	0.0047
CTACK	Ovarian (serous, borderline)	3	1.01,0.82,1.25	0.917	0.995659	0.396	1.27,0.75,2.15	0.364	0.343	1.12,0.54,2.84	0.688	1.02,0.81,1.29	0.880				0.56	0.0601
GROa	Ovarian (serous, invasive HG)	11	1.00,0.96,1.04	0.917	0.995659	0.587	1.03,0.97,1.10	0.305	0.135	1.01,0.97,1.05	0.771	1.01,0.96,1.07	0.609	0.676	NA		1.00	0.2724
VEGF	Ovarian (mucinous, borderline & invasive)	21	1.01,0.85,1.20	0.918	0.995659	0.654	0.86,0.65,1.14	0.290	0.155	0.97,0.79,1.69	0.765	0.95,0.76,1.18	0.622	0.586	NA		0.74	0.0725
MCP3	Ovarian Serous (invasive LG & HG)	10	1.00,0.95,1.05	0.918	0.995659	0.206	0.94,0.83,1.06	0.296	0.268	0.98,0.92,1.08	0.629	0.97,0.91,1.03	0.263	0.243	NA		1.00	0.2464
IL-18	Ovarian (serous, borderline)	5	1.01,0.82,1.25	0.919	0.995775	0.912	0.88,0.45,1.73	0.708	0.668	1.01,0.58,2.17	0.920	0.98,0.76,1.26	0.851	0.895	NA		0.49	0.0506
RANTES	Endometrial (overall)	1	1.01,0.80,1.28	0.92	0.995775												0.52	0.0091
SCGFb	Endometrial (overall)	2	0.99,0.75,1.29	0.92	0.995775	0.118											0.76	0.0161
MIF	Ovarian (serous, MA incl. CIMBA)	2	0.99,0.86,1.14	0.925	0.996504	0.539											0.87	0.019
CTACK	Ovarian (overall, MA incl. CIMBA)	3	1.00,0.93,1.08	0.926	0.996504	0.924	1.04,0.87,1.23	0.691	0.694	1.00,0.75,1.30	1.000	1.00,0.93,1.08	0.997				1.00	0.0601
SCF	Prostate (advanced)	2	0.98,0.69,1.40	0.927	0.996504	0.322											0.23	0.0033
activePAI	Prostate (overall)	1	1.01,0.81,1.26	0.928	0.996504												0.47	0.0031
HGF	Ovarian (clearcell, invasive)	6	1.03,0.59,1.80	0.929	0.996504	0.520	0.90,0.47,1.73	0.751	0.451			1.02,0.57,1.81	0.960	0.227	NA		0.11	0.0097
SCGFb	Ovarian (serous, borderline & invasive LG)	2	1.01,0.74,1.39	0.929	0.996504	0.648											0.72	0.0161
TNF-A	Prostate (high vs low+int risk)	2	1.01,0.77,1.34	0.93	0.996504	0.599											0.30	0.0044
IL12p70	Breast (triple negative)	1	0.98,0.64,1.51	0.931	0.996504												0.11	0.0015
activePAI	Lung (overall)	1	0.99,0.72,1.35	0.933	0.996504												0.31	0.0031
TNF-A	Ovarian (serous, borderline)	2	1.03,0.49,2.17	0.933	0.996504	0.649											0.09	0.0044
IL-6	Ovarian (serous, MA incl. CIMBA)	1	0.98,0.64,1.50	0.934	0.996504												0.16	0.0018
RANTES	Ovarian (serous, invasive LG)	1	0.97,0.46,2.03	0.936	0.996504												0.09	0.0091
SeSelectin	Ovarian (serous, invasive LG)	2	1.03,0.47,2.24	0.937	0.996504	0.699											0.09	0.0079
sICAM	Breast (overall)	22	1.00,0.97,1.03	0.938	0.996504	0.207	1.07,1.00,1.14	0.040	0.028	0.99,0.94,1.05	0.820	1.01,0.97,1.04	0.623	0.208	NA		1.00	0.1468
sVCAM	Ovarian (serous, MA incl. CIMBA)	1	1.01,0.74,1.39	0.939	0.996504												0.23	0.003
IL-7	Breast (luminal B)	1	1.01,0.70,1.48	0.939	0.996504												0.34	0.0047
IP-10	Ovarian (serous, MA incl. CIMBA)	4	1.01,0.77,1.33	0.94	0.996504	0.052	1.12,0.32,3.90	0.857	0.865			1.04,0.83,1.31	0.713	0.049	No significant outliers		0.73	0.0131
sVCAM	Ovarian (borderline)	1	0.97,0.49,1.93	0.941	0.996504												0.09	0.003
TRAIL	Ovarian (clearcell, invasive)	43	1.02,0.62,1.67	0.941	0.996504	0.117	0.82,0.35,1.91	0.643	0.532	0.85,0.54,1.33	0.488	0.87,0.47,1.60	0.657	0.170	NA		0.16	0.0183
SCGFb	Lung (small cell)	2	0.99,0.71,1.38	0.944	0.996504	0.751											0.23	0.0161
IL-2ra	Lung (squamous cell)	11	1.00,0.93,1.07	0.944	0.996504	0.397	1.01,0.90,1.14	0.833	0.754	1.01,0.90,1.17	0.828	1.00,0.92,1.09	0.925	0.448	NA		1.00	0.2326
MIP1b	Ovarian (clearcell, invasive)	21	1.01,0.81,1.25	0.945	0.996504	0.097	0.89,0.62,1.29	0.534	0.412	1.45,0.97,2.10	0.070	0.90,0.71,1.14	0.382	0.062	NA		0.76	0.1345
GROa	Ovarian Serous (invasive LG & HG)	11	1.00,0.96,1.04	0.948	0.996504	0.540	1.03,0.97,1.09	0.344	0.219	1.01,0.97,1.04	0.634	1.00,0.96,1.05	0.863	0.655	NA		1.00	0.2724
MCP3	Ovarian (overall, MA incl. CIMBA)	10	1.00,0.96,1.03	0.949	0.996504	0.434	1.00,0.92,1.09	0.983	0.996	1.01,0.95,1.10	0.476	1.00,0.95,1.04	0.902	0.517	NA		1.00	0.2464
SCF	Endometrial (endometrioid)	2	1.01,0.65,1.58	0.95	0.996504	0.349											0.17	0.0036
IL-2ra	Ovarian (serous, invasive LG)	11	0.99,0.84,1.18	0.95	0.996504	0.596	1.15,0.87,1.53	0.332	0.211	1.08,0.85,1.29	0.417	1.05,0.85,1.30	0.645	0.621	NA		0.85	0.2326
activePAI	Lung (never smokers)	1	1.03,0.39,2.70	0.952	0.996504												0.07	0.0031
PDGFbb	Ovarian (endometrioid, invasive)	1	1.04,0.27,3.94	0.954	0.996504												0.06	0.001
MCP1	Ovarian (serous, borderline & invasive LG)	25	1.02,0.53,1.97	0.954	0.996504	0.441	1.85,0.59,5.81	0.293	0.215	1.02,0.53,1.95	0.948	0.79,0.31,2.00	0.623	0.461	NA		0.26	0.0043
CTACK	Ovarian (serous, MA incl. CIMBA)	3	1.00,0.93,1.08	0.956	0.996504	0.631	1.09,0.89,1.32	0.402	0.372	1.00,0.66,1.23	1.000	1.01,0.92,1.09	0.901				1.00	0.0601
TNF-A	Ovarian (serous, borderline & invasive LG)	2	1.02,0.55,1.89	0.957	0.996504	0.785											0.26	0.0044
IL-8	Lung (ever smokers)	1	0.99,0.69,1.42	0.957	0.996504												0.22	0.0045
SeSelectin	Breast (luminal B)	2	1.01,0.72,1.41	0.958	0.996504	0.241											0.52	0.0079
IL-16	Endometrial (non-endometrioid)	17	1.01,0.73,1.39	0.96	0.996504	0.572	0.79,0.52,1.19	0.265	0.068	0.93,0.65,1.68	0.677	0.86,0.60,1.24	0.433	0.382	NA		0.25	0.0351
IL12p70	Lung (adenocarcinoma)	1	1.01,0.64,1.60	0.961	0.996504												0.11	0.0015
sVCAM	Ovarian (mucinous, borderline)	1	0.97,0.34,2.80	0.961	0.996504												0.07	0.003
VEGF	Lung (squamous cell)	21	1.00,0.90,1.11	0.961	0.996504	0.987	1.04,0.88,1.23	0.638	0.526	1.02,0.90,1.14	0.793	1.02,0.89,1.16	0.820	0.989	NA		0.99	0.0725
IL-1ra	Ovarian (serous, borderline & invasive LG)	18	1.00,0.85,1.16	0.961	0.996504	0.931	1.09,0.79,1.50	0.603	0.536	1.01,0.84,1.21	0.880	0.99,0.82,1.21	0.953	0.949	NA		1.00	0.0754
RANTES	Lung (overall)	1	1.00,0.84,1.19	0.962	0.996504												0.70	0.0091
MIF	Ovarian (overall, MA incl. CIMBA)	2	1.00,0.88,1.13	0.962	0.996504	0.979											0.95	0.019
Eotaxin	Ovarian (mucinous, invasive)	2	0.97,0.24,3.83	0.963	0.996504	0.070											0.09	0.0056
sICAM	Ovarian (overall, invasive)	22	1.00,0.95,1.05	0.963	0.996504	0.916	1.08,0.95,1.24	0.245	0.198	1.03,0.93,1.10	0.476	1.02,0.95,1.10	0.569	0.915	NA		1.00	0.1468
IL-6	Ovarian (serous, invasive HG)	1	0.99,0.59,1.65	0.964	0.996504												0.13	0.0018
CTACK	Lung (adenocarcinoma)	2	1.00,0.90,1.10	0.964	0.996504	0.447											0.99	0.0562
activePAI	Breast (luminal B)	1	1.01,0.62,1.66	0.967	0.99654												0.25	0.0031
activePAI	Lung (squamous cell)	1	1.01,0.61,1.68	0.967	0.99654												0.14	0.0031
RANTES	Endometrial (non-endometrioid)	1	1.01,0.50,2.06	0.968	0.99654												0.10	0.0091
MIG	Ovarian (overall, invasive)	1	1.00,0.84,1.20	0.971	0.996905												0.66	0.0111
IL-7	Ovarian (serous, invasive LG)	1	0.98,0.35,2.73	0.972	0.996905												0.07	0.0047
MCP3	Ovarian (serous, invasive HG)	10	1.00,0.95,1.05	0.972	0.996905	0.258	0.95,0.84,1.07	0.368	0.310	0.99,0.93,1.10	0.580	0.98,0.93,1.05	0.616	0.273	NA		1.00	0.2464
CTACK	Ovarian (serous, borderline & invasive LG)	3	1.00,0.81,1.23	0.974	0.99795	0.231	1.14,0.58,2.25	0.712	0.678	0.99,0.74,2.95	0.988	0.99,0.81,1.19	0.880				1.00	0.0601
IP-10	Lung (ever smokers)	4	1.00,0.76,1.30	0.977	0.998953	0.137	1.27,0.38,4.29	0.696	0.681			1.05,0.82,1.34	0.725	0.131	NA		0.53	0.0131
TRAIL	Ovarian (serous, borderline)	43	0.99,0.64,1.55	0.977	0.998953	0.069	1.33,0.63,2.83	0.456	0.347	0.89,0.59,1.31	0.558	0.96,0.56,1.66	0.890	0.094	NA		0.21	0.0183
IL-8	Ovarian (serous, borderline)	1	1.01,0.46,2.20	0.978	0.999077												0.09	0.0045
RANTES	Ovarian (serous, borderline)	1	1.01,0.59,1.72	0.979	0.999077												0.13	0.0091
SeSelectin	Prostate (advanced)	2	1.00,0.80,1.24	0.984	0.999077	0.729											0.47	0.0079
IP-10	Endometrial (overall)	4	1.00,0.82,1.22	0.984	0.999077	0.679	0.90,0.42,1.93	0.794	0.791			0.97,0.77,1.22	0.775	0.709	NA		0.67	0.0131
TNF-A	Ovarian (serous, invasive LG)	2	1.01,0.35,2.89	0.985	0.999077	0.932											0.07	0.0044
TRAIL	Prostate (high vs low risk)	38	1.00,0.80,1.26	0.985	0.999077	0.985	1.14,0.77,1.69	0.507	0.425	1.02,0.81,1.27	0.870	0.98,0.72,1.33	0.886	0.984	NA		0.45	0.0178
RANTES	Lung (squamous cell)	1	1.00,0.76,1.33	0.986	0.999077												0.33	0.0091
IL12p70	Lung (small cell)	1	0.99,0.43,2.31	0.987	0.999077												0.07	0.0015
TNF-A	Ovarian (overall, invasive)	2	1.00,0.68,1.47	0.987	0.999077	0.166											0.32	0.0044
sICAM	Prostate (overall)	22	1.00,0.96,1.04	0.988	0.999077	0.208	0.98,0.89,1.08	0.689	0.659	1.05,0.94,1.11	0.272	1.00,0.95,1.05	0.924	0.172	NA		1.00	0.1468
IL-8	Lung (adenocarcinoma)	1	1.00,0.69,1.44	0.989	0.999077												0.24	0.0045
MIP1b	Endometrial (non-endometrioid)	21	1.00,0.80,1.25	0.99	0.999077	0.327	0.75,0.52,1.08	0.126	0.060	0.92,0.68,2.23	0.531	0.90,0.68,1.21	0.503	0.291	NA		0.71	0.1345
IL-7	Breast (triple negative)	1	1.00,0.72,1.39	0.992	0.999077												0.22	0.0047
MIP1b	Endometrial (overall)	21	1.00,0.91,1.10	0.992	0.999077	0.013	0.90,0.77,1.05	0.199	0.114	0.93,0.86,1.25	0.342	0.95,0.86,1.04	0.252		2 outlier(s)	0.96,0.89,1.03	1.00	0.1345
MIG	Breast (triple negative)	1	1.00,0.81,1.23	0.993	0.999077												0.45	0.0111
IL-16	Endometrial (overall)	17	1.00,0.90,1.12	0.993	0.999077	0.495	1.01,0.88,1.16	0.906	0.860	1.01,0.91,1.13	0.900	1.00,0.88,1.13	0.977	0.620	NA		0.98	0.0351
sICAM	Ovarian (serous, MA incl. CIMBA)	22	1.00,0.95,1.05	0.993	0.999077	0.930	1.06,0.93,1.21	0.391	0.352	0.99,0.92,1.08	0.864	1.00,0.93,1.08	0.934	0.924	NA		1.00	0.1468
MCSF	Breast (HER2 enriched)	11	1.00,0.84,1.19	0.995	0.999077	0.490	0.94,0.57,1.56	0.817	0.806	1.07,0.90,1.30	0.472	1.08,0.86,1.36	0.522	0.510	NA		0.98	0.0457
IL-18	Ovarian (overall, MA incl. CIMBA)	5	1.00,0.93,1.07	0.996	0.999077	0.669	1.04,0.82,1.30	0.757	0.743	1.01,0.82,1.11	0.738	1.02,0.93,1.11	0.703	0.737	NA		1.00	0.0506
VEGF	Ovarian (serous, borderline)	21	1.00,0.82,1.22	0.997	0.999648	0.692	0.97,0.70,1.35	0.852	0.816	1.01,0.58,1.30	0.938	1.05,0.81,1.36	0.704	0.720	NA		0.64	0.0725
MIF	Ovarian (borderline)	2	1.00,0.74,1.35	1	0.999793	0.381											0.31	0.019
IL-16	Ovarian (overall, invasive)	17	1.00,0.90,1.11	1	0.999793	0.279	0.97,0.85,1.12	0.691	0.531	1.02,0.86,1.53	0.692	0.97,0.86,1.09	0.586	0.187	NA		0.99	0.0351
MCSF	Ovarian Serous (invasive LG & HG)	11	1.00,0.90,1.11	1	0.999793	0.770	1.10,0.82,1.47	0.515	0.485	1.02,0.76,1.29	0.672	1.00,0.87,1.15	0.997	0.789	NA		0.99	0.0457
CTACK	Ovarian (serous, invasive LG)	3	1.00,0.75,1.34	1	0.999793	0.378	0.98,0.36,2.65	0.965	0.961	0.95,0.65,3.45	0.741	0.96,0.70,1.31	0.801				0.34	0.0601
*FDR-significant associations are highlighted in bold

## Sheet: S6. Summary_cis-eQTL
Supplementary Table 6
Exposure	Outcome	N_instr	IVW..OR..95.CI.	IVW..P.val	Qvalue_FDR*	Q.test..P.val	Egger..OR..95.CI.	Egger..P.slope	Egger..P.intercept	ConMix..OR..95.CI.	ConMix..P.val	W..Median..OR..95.CI.	W..Median..P.val	P..Presso.Global.test.	Outliers	Corrected.OR..95..CI	Power.in.MR	Variance.explained..R2.
MIF	Breast (overall)	4	0.88,0.83,0.94	0.0001	0.103524	0.734	0.87,0.74,1.02	0.096	0.862	0.87,0.81,0.94	0.009	0.88,0.81,0.96	0.003	0.843	NA		1.00	0.0181
sICAM	Endometrial (endometrioid)	2	0.47,0.31,0.70	0.000196	0.103524	0.854											0.20	0.0044
MIG	Endometrial (non-endometrioid)	2	3.73,1.86,7.47	0.0002	0.103524	0.723											0.09	0.0081
RANTES	Ovarian (serous, MA incl. CIMBA)	1	0.70,0.57,0.85	0.00038	0.118181												0.57	0.0091
sICAM	Endometrial (overall)	2	0.55,0.39,0.77	0.000462	0.119742	0.426											0.29	0.0044
RANTES	Ovarian (overall, MA incl. CIMBA)	1	0.75,0.62,0.89	0.0013	0.19421												0.71	0.0091
IL-8	Ovarian (clearcell, invasive)	2	4.29,1.75,10.48	0.00141	0.19421	0.733											0.08	0.0051
MIF	Breast (HER2 enriched)	4	0.66,0.50,0.86	0.00208	0.202721	0.534	0.70,0.34,1.45	0.338	0.842	0.61,0.43,0.83	0.021	0.63,0.45,0.89	0.009	0.703	NA		0.73	0.0181
VEGF	Lung (small cell)	1	43.94,3.82,504.78	0.00239	0.20668												0.05	0.0003
IL-6	Endometrial (overall)	1	3.72,1.53,9.04	0.00378	0.280136												0.08	0.0006
IL-6	Lung (adenocarcinoma)	1	4.07,1.56,10.58	0.00402	0.284654												0.07	0.0006
MIF	Ovarian (serous, invasive LG)	4	0.48,0.29,0.80	0.0044	0.297882	0.766	0.41,0.11,1.51	0.178	0.786	0.48,0.14,0.80	0.031	0.51,0.27,0.96	0.036	0.824	NA		0.13	0.0181
IL-6	Lung (overall)	1	2.67,1.34,5.31	0.00515	0.334052												0.10	0.0006
RANTES	Breast (luminal A)	1	0.84,0.75,0.95	0.00571	0.350218												0.93	0.0091
TNF-B	Prostate (high vs low+int risk)	1	0.52,0.33,0.83	0.00608	0.350218												0.13	0.0014
MIF	Breast (luminal A)	4	0.89,0.82,0.97	0.0063	0.350218	0.498	0.86,0.68,1.08	0.198	0.748	0.89,0.67,0.96	0.068	0.90,0.81,1.00	0.050	0.663	NA		1.00	0.0181
MCP1	Breast (luminal B, HER2 neg.)	3	2.22,1.25,3.95	0.00685	0.350218	0.999	2.26,0.17,29.41	0.533	0.987	2.21,1.25,3.94	0.007	2.22,0.00,1446.73	0.810				0.14	0.0015
CTACK	Endometrial (endometrioid)	2	1.20,1.05,1.38	0.00706	0.350218	0.653											0.92	0.0415
IL-6	Breast (HER2 enriched)	1	7.55,1.72,33.16	0.00741	0.350218												0.07	0.0006
RANTES	Breast (HER2 enriched)	1	0.60,0.41,0.87	0.00757	0.350218												0.45	0.0091
SCF	Lung (adenocarcinoma)	1	0.23,0.08,0.68	0.00765	0.350218												0.07	0.0004
bNGF	Lung (adenocarcinoma)	1	2.02,1.20,3.41	0.00844	0.375198												0.13	0.0018
TNF-B	Prostate (high vs low risk)	1	0.38,0.18,0.78	0.00893	0.375795												0.08	0.0014
IL-6	Endometrial (endometrioid)	1	4.03,1.42,11.46	0.00894	0.375795												0.07	0.0006
MCP1	Breast (overall)	3	1.36,1.08,1.72	0.00934	0.382535	0.838	1.28,0.46,3.59	0.638	0.906	1.36,1.08,1.90	0.020	1.41,0.13,15.89	0.780				0.41	0.0015
MIG	Ovarian (mucinous, borderline & invasive)	2	1.86,1.16,2.98	0.0101	0.394408	0.524											0.14	0.0081
RANTES	Ovarian Serous (invasive LG & HG)	1	0.74,0.58,0.93	0.0112	0.40948												0.46	0.0091
VEGF	Prostate (overall)	1	2.28,1.20,4.31	0.0113	0.40948												0.09	0.0003
CTACK	Lung (never smokers)	2	1.42,1.08,1.87	0.0119	0.421078	0.891											0.38	0.0415
FGFBasic	Breast (luminal A)	2	0.75,0.60,0.94	0.0124	0.427481	0.364											0.38	0.0021
RANTES	Breast (overall)	1	0.89,0.81,0.98	0.0131	0.437426												0.99	0.0091
IL-18	Lung (overall)	2	0.88,0.80,0.97	0.0137	0.437426	0.832											0.98	0.0243
RANTES	Ovarian (serous, invasive HG)	1	0.74,0.58,0.94	0.0138	0.437426												0.44	0.0091
TNF-B	Prostate (advanced)	1	0.54,0.33,0.88	0.0141	0.438277												0.12	0.0014
CTACK	Endometrial (overall)	2	1.15,1.03,1.29	0.0154	0.451661	0.350											0.99	0.0415
MCP1	Breast (triple negative)	3	2.06,1.15,3.71	0.0157	0.452745	0.412	2.98,0.10,87.48	0.526	0.826	2.05,0.01,75.16	0.165	2.07,0.02,197.44	0.754				0.10	0.0015
sICAM	Breast (luminal B, HER2 neg.)	2	0.66,0.47,0.93	0.0174	0.49247	0.345											0.32	0.0044
GROa	Breast (triple negative)	1	1.07,1.01,1.13	0.0209	0.542493												1.00	0.1274
IL-8	Ovarian (mucinous, invasive)	2	2.79,1.16,6.71	0.0217	0.544836	0.955											0.08	0.0051
MCSF	Lung (never smokers)	3	0.64,0.44,0.94	0.0239	0.572734	0.571	0.68,0.29,1.62	0.388	0.880			0.65,0.05,8.18	0.739				0.19	0.0176
RANTES	Lung (never smokers)	1	0.55,0.32,0.93	0.0259	0.591868												0.12	0.0091
RANTES	Ovarian (overall, invasive)	1	0.79,0.65,0.97	0.0268	0.598861												0.58	0.0091
IL-18	Lung (ever smokers)	2	0.87,0.76,0.98	0.0277	0.598861	0.876											0.79	0.0243
MCSF	Ovarian (borderline)	3	1.41,1.04,1.93	0.0282	0.598861	0.698	1.29,0.67,2.46	0.442	0.752			1.37,1.00,1.89	0.053				0.29	0.0176
TRAIL	Ovarian (serous, invasive LG)	4	2.76,1.10,6.94	0.031	0.598861	0.601	0.34,0.00,31.38	0.640	0.354	4.88,1.20,5.51	0.038	3.48,1.03,11.80	0.045	0.519	NA		0.07	0.0054
IL-1ra	Breast (luminal B)	2	0.81,0.67,0.98	0.0316	0.598861	0.860											0.84	0.0170
MIP1a	Prostate (overall)	1	1.05,1.00,1.10	0.0316	0.598861												1.00	0.0590
SCGFb	Ovarian (overall, MA incl. CIMBA)	1	1.34,1.02,1.76	0.0329	0.598861												0.38	0.0040
FGFBasic	Breast (overall)	2	0.83,0.70,0.99	0.0332	0.598861	0.835											0.55	0.0021
IL-8	Ovarian (overall, invasive)	2	1.35,1.02,1.79	0.0332	0.598861	0.664											0.36	0.0051
MCSF	Ovarian (serous, borderline & invasive LG)	3	1.40,1.03,1.92	0.0339	0.598861	0.501	1.12,0.58,2.17	0.728	0.450			1.41,1.02,1.95	0.040				0.75	0.0176
CTACK	Breast (luminal B, HER2 neg.)	2	0.89,0.79,0.99	0.0356	0.598861	0.886											1.00	0.0415
MCSF	Breast (luminal B, HER2 neg.)	3	1.19,1.01,1.41	0.0368	0.598861	0.975	1.24,0.87,1.75	0.235	0.823			1.20,1.01,1.42	0.041				0.85	0.0176
VEGF	Ovarian (mucinous, borderline)	1	40.83,1.26,1327.10	0.0368	0.598861												0.05	0.0003
TNF-B	Ovarian (borderline)	1	0.33,0.12,0.94	0.0372	0.598861												0.07	0.0014
MIG	Ovarian (mucinous, borderline)	2	2.10,1.04,4.21	0.0377	0.598861	0.435											0.09	0.0081
sVCAM	Ovarian (clearcell, invasive)	1	2.84,1.06,7.60	0.0381	0.598861												0.07	0.0030
SCGFb	Breast (luminal B, HER2 neg.)	1	0.69,0.49,0.98	0.0391	0.598861												0.30	0.0040
SCGFb	Ovarian (endometrioid, invasive)	1	2.01,1.04,3.89	0.0391	0.598861												0.10	0.0040
TNF-B	Ovarian (mucinous, borderline)	1	0.19,0.04,0.92	0.0394	0.598861												0.06	0.0014
IL-6	Lung (squamous cell)	1	3.17,1.05,9.56	0.0402	0.598861												0.07	0.0006
MIF	Prostate (high vs low+int risk)	4	1.16,1.01,1.33	0.0402	0.598861	0.946	1.11,0.78,1.58	0.570	0.806	1.16,1.01,1.60	0.048	1.13,0.96,1.33	0.141	0.916	NA		0.83	0.0181
MIF	Lung (adenocarcinoma)	4	0.83,0.70,0.99	0.0404	0.598861	0.869	0.79,0.50,1.22	0.286	0.775	0.81,0.65,1.23	0.078	0.81,0.66,1.00	0.053	0.848	NA		0.71	0.0181
VEGF	Endometrial (non-endometrioid)	1	38.57,1.17,1273.45	0.0406	0.598861												0.05	0.0003
MIF	Prostate (overall)	4	0.92,0.84,1.00	0.0408	0.598861	0.421	0.84,0.67,1.06	0.151	0.459	0.92,0.69,0.99	0.116	0.92,0.83,1.02	0.113	0.601	NA		0.99	0.0181
TNF-B	Ovarian (clearcell, invasive)	1	4.82,1.06,22.00	0.0422	0.604284												0.06	0.0014
IL-2ra	Ovarian (mucinous, borderline & invasive)	4	0.88,0.78,1.00	0.0429	0.604284	0.384	0.98,0.78,1.24	0.890	0.259	0.89,0.74,1.01	0.073	0.89,0.78,1.03	0.111	0.433	NA		0.94	0.1296
IL-16	Ovarian (serous, borderline)	4	0.75,0.57,0.99	0.0431	0.604284	0.377	0.86,0.61,1.20	0.367	0.190	0.75,0.59,1.00	0.050	0.79,0.60,1.05	0.106	0.253	NA		0.32	0.0303
Eotaxin	Prostate (high vs low risk)	1	0.59,0.35,0.98	0.0435	0.604284												0.12	0.0030
MIF	Lung (overall)	4	0.88,0.77,1.00	0.0444	0.604284	0.371	0.81,0.55,1.19	0.278	0.656	0.85,0.75,0.96	0.040	0.85,0.73,0.98	0.031	0.447	NA		0.94	0.0181
VEGF	Ovarian (borderline)	1	10.22,1.06,98.80	0.0447	0.604284												0.05	0.0003
Eotaxin	Prostate (high vs low+int risk)	1	0.72,0.52,0.99	0.0455	0.60612												0.22	0.0030
TRAIL	Breast (luminal B)	4	0.69,0.48,0.99	0.0463	0.60612	0.327	2.74,0.51,14.56	0.238	0.098	0.62, NA, NA	0.088	0.68,0.42,1.09	0.109	0.439	NA		0.38	0.0054
bNGF	Breast (luminal A)	1	1.30,1.00,1.69	0.0465	0.60612												0.34	0.0018
SCGFb	Ovarian (overall, invasive)	1	1.36,1.00,1.85	0.049	0.60612												0.30	0.0040
MCSF	Ovarian (mucinous, borderline)	3	1.62,1.00,2.63	0.0502	0.60612	0.967	1.82,0.66,5.01	0.245	0.797			1.64,0.91,2.93	0.098				0.14	0.0176
IL-1ra	Endometrial (overall)	2	0.85,0.72,1.00	0.0516	0.60612	0.751											0.79	0.0170
SCGFb	Breast (HER2 enriched)	1	1.78,1.00,3.18	0.0518	0.60612												0.23	0.0040
sVCAM	Endometrial (endometrioid)	1	0.65,0.42,1.00	0.0518	0.60612												0.15	0.0030
IL-6	Lung (ever smokers)	1	2.36,0.99,5.64	0.054	0.610455												0.07	0.0006
Eotaxin	Breast (luminal B)	1	0.65,0.42,1.01	0.0542	0.610455												0.24	0.0030
MCP1	Lung (squamous cell)	2	1.96,0.99,3.88	0.0549	0.610455	0.366											0.09	0.0014
MCP1	Breast (luminal A)	3	1.35,0.99,1.83	0.0581	0.615086	0.726	2.31,0.59,8.95	0.227	0.423	1.37,1.00,1.85	0.057	1.37,0.07,25.29	0.834				0.28	0.0015
IL-16	Ovarian (borderline)	4	0.81,0.64,1.01	0.0586	0.615086	0.619	0.89,0.68,1.17	0.411	0.222	0.80,0.66,1.00	0.061	0.82,0.65,1.03	0.085	0.363	NA		0.45	0.0303
IL-6	Breast (luminal B)	1	0.37,0.13,1.04	0.0589	0.615086												0.08	0.0006
MIP1a	Lung (small cell)	1	0.85,0.71,1.01	0.0595	0.615086												0.64	0.0590
SeSelectin	Lung (adenocarcinoma)	2	1.67,0.98,2.86	0.0601	0.615086	0.442											0.12	0.0016
MIP1b	Prostate (overall)	3	0.82,0.66,1.01	0.0608	0.617325	0.385	0.61,0.34,1.09	0.095	0.292			0.79,0.62,1.00	0.051				0.46	0.0031
IL-8	Ovarian (mucinous, borderline & invasive)	2	1.86,0.97,3.57	0.0623	0.61746	0.782											0.11	0.0051
SCGFb	Lung (small cell)	1	1.90,0.96,3.74	0.0657	0.634731												0.09	0.0040
Eotaxin	Prostate (advanced)	1	0.72,0.51,1.02	0.0662	0.634731												0.21	0.0030
MIG	Breast (triple negative)	2	0.80,0.63,1.02	0.0665	0.634731	0.391											0.35	0.0081
MCSF	Prostate (advanced)	3	0.87,0.74,1.01	0.067	0.635312	0.882	0.91,0.66,1.25	0.541	0.763			0.87,0.42,1.79	0.701				0.80	0.0176
IL-18	Prostate (high vs low+int risk)	2	1.11,0.99,1.24	0.0683	0.642371	0.855											0.92	0.0243
IL-16	Ovarian (serous, borderline & invasive LG)	4	0.81,0.65,1.02	0.069	0.642371	0.627	0.89,0.67,1.17	0.399	0.279	0.81,0.66,1.02	0.081	0.82,0.65,1.03	0.093	0.557	NA		0.94	0.0303
GROa	Breast (luminal B)	1	1.06,1.00,1.13	0.07	0.642371												1.00	0.1274
MCSF	Ovarian (serous, invasive LG)	3	1.61,0.96,2.71	0.0704	0.642371	0.886	1.35,0.45,4.03	0.586	0.719			1.61,0.94,2.76	0.080				0.13	0.0176
IL-1ra	Lung (ever smokers)	2	0.86,0.74,1.01	0.0716	0.642371	0.527											0.64	0.0170
IL-18	Lung (never smokers)	2	0.75,0.55,1.03	0.0729	0.642371	0.310											0.24	0.0243
sVCAM	Breast (triple negative)	1	0.72,0.50,1.03	0.0741	0.642371												0.16	0.0030
bNGF	Lung (ever smokers)	1	1.55,0.96,2.50	0.0744	0.642371												0.12	0.0018
MIG	Ovarian (mucinous, invasive)	2	1.76,0.94,3.29	0.075	0.642371	0.708											0.10	0.0081
VEGF	Ovarian (endometrioid, invasive)	1	7.97,0.81,78.32	0.0751	0.642371												0.05	0.0003
SeSelectin	Ovarian (serous, invasive LG)	2	0.23,0.05,1.17	0.076	0.642371	0.514											0.06	0.0016
sICAM	Ovarian (clearcell, invasive)	2	0.44,0.18,1.09	0.0767	0.642371	0.449											0.08	0.0044
GROa	Breast (overall)	1	1.02,1.00,1.04	0.0769	0.642371												1.00	0.1274
MIG	Breast (overall)	2	0.90,0.81,1.01	0.0774	0.642371	0.238											0.98	0.0081
SCGFb	Ovarian (clearcell, invasive)	1	2.30,0.91,5.78	0.0775	0.642371												0.07	0.0040
IL-1ra	Lung (squamous cell)	2	0.84,0.68,1.02	0.0781	0.642371	0.737											0.54	0.0170
IL-1ra	Prostate (overall)	2	0.93,0.85,1.01	0.0781	0.642371	0.357											0.99	0.0170
FGFBasic	Breast (triple negative)	2	0.68,0.44,1.05	0.0789	0.642371	0.704											0.13	0.0021
MCSF	Breast (overall)	3	1.06,0.99,1.13	0.0801	0.642371	0.946	1.08,0.94,1.24	0.263	0.743			1.06,0.99,1.14	0.082				1.00	0.0176
MCSF	Endometrial (overall)	3	0.86,0.73,1.02	0.0812	0.645667	0.983	0.85,0.60,1.20	0.355	0.913			0.86,0.46,1.62	0.645				0.80	0.0176
MIG	Breast (luminal B)	2	0.78,0.59,1.03	0.083	0.655353	0.646											0.53	0.0081
CTACK	Ovarian (clearcell, invasive)	2	0.77,0.57,1.04	0.0847	0.662596	0.619											0.31	0.0415
MIP1b	Endometrial (endometrioid)	3	0.66,0.41,1.06	0.0856	0.662845	0.703	1.03,0.29,3.66	0.965	0.465			0.71,0.42,1.19	0.190				0.15	0.0031
MCSF	Endometrial (endometrioid)	3	0.84,0.69,1.02	0.0858	0.662845	0.632	0.99,0.66,1.49	0.970	0.377			0.85,0.69,1.04	0.108				0.60	0.0176
MCSF	Lung (squamous cell)	3	1.19,0.97,1.46	0.0865	0.662845	0.543	1.46,0.95,2.25	0.088	0.306			1.20,0.98,1.48	0.083				0.56	0.0176
TNF-B	Ovarian (overall, MA incl. CIMBA)	1	1.46,0.94,2.27	0.0882	0.672647												0.17	0.0014
IL-2ra	Breast (HER2 enriched)	4	1.11,0.98,1.24	0.0902	0.681011	0.271	1.30,1.07,1.57	0.007	0.053	1.14, NA, NA	0.075	1.14,1.02,1.27	0.021	0.295	NA		1.00	0.1296
GROa	Ovarian (mucinous, borderline)	1	0.86,0.73,1.02	0.0911	0.685117												0.66	0.1274
IL-1a	Endometrial (overall)	1	1.71,0.92,3.21	0.0923	0.690732												0.11	0.0011
bNGF	Ovarian (mucinous, borderline & invasive)	1	2.31,0.87,6.13	0.0934	0.694664												0.07	0.0018
sICAM	Prostate (high vs low+int risk)	2	1.28,0.96,1.72	0.0941	0.694664	0.971											0.30	0.0044
sVCAM	Ovarian (mucinous, invasive)	1	0.45,0.17,1.15	0.0942	0.694664												0.07	0.0030
MIP1b	Endometrial (overall)	3	0.72,0.48,1.07	0.102	0.738751	0.744	0.90,0.31,2.64	0.844	0.660			0.73,0.47,1.13	0.158				0.22	0.0031
TRAIL	Breast (overall)	4	0.78,0.57,1.05	0.103	0.742803	0.000	2.17,0.74,6.35	0.157	0.055	0.88,0.78,1.01	0.060	0.87,0.72,1.05	0.148	0.007	1 outlier(s)	0.88,0.82,0.94	0.91	0.0054
SeSelectin	Endometrial (non-endometrioid)	2	3.27,0.78,13.77	0.106	0.757726	0.369											0.06	0.0016
MIF	Prostate (high vs low risk)	4	1.19,0.96,1.48	0.111	0.78555	0.783	1.11,0.64,1.94	0.707	0.796	1.19,0.84,2.45	0.128	1.19,0.92,1.53	0.177	0.694	NA		0.46	0.0181
bNGF	Ovarian (mucinous, borderline)	1	3.21,0.76,13.54	0.112	0.786226												0.06	0.0018
CTACK	Prostate (high vs low+int risk)	2	0.93,0.84,1.02	0.112	0.786226	0.863											0.99	0.0415
SCF	Lung (overall)	1	0.53,0.24,1.16	0.113	0.786788												0.08	0.0004
IL-18	Ovarian (endometrioid, invasive)	2	1.22,0.95,1.56	0.114	0.786788	0.959											0.35	0.0243
MIP1a	Ovarian (serous, invasive LG)	1	1.25,0.95,1.64	0.114	0.786788												0.33	0.0590
MCSF	Prostate (overall)	3	0.93,0.85,1.02	0.115	0.791248	0.501	1.02,0.85,1.23	0.808	0.257			0.94,0.85,1.02	0.153				0.99	0.0176
FGFBasic	Lung (never smokers)	2	0.45,0.17,1.22	0.116	0.794856	0.470											0.07	0.0021
bNGF	Breast (overall)	1	1.17,0.96,1.44	0.118	0.79595												0.49	0.0018
IL-16	Ovarian (clearcell, invasive)	4	0.78,0.58,1.07	0.121	0.812577	0.925	0.79,0.54,1.15	0.212	0.986	0.78,0.58,1.06	0.121	0.78,0.57,1.06	0.116	0.895	NA		0.24	0.0303
IL-8	Endometrial (non-endometrioid)	2	0.50,0.21,1.21	0.123	0.82343	0.319											0.08	0.0051
IL-8	Breast (triple negative)	2	1.29,0.93,1.78	0.124	0.82343	0.883											0.24	0.0051
IL-8	Ovarian (overall, MA incl. CIMBA)	2	1.21,0.95,1.54	0.127	0.839794	0.820											0.46	0.0051
IL-1a	Breast (triple negative)	1	0.62,0.33,1.15	0.128	0.839794												0.09	0.0011
TRAIL	Endometrial (non-endometrioid)	4	0.51,0.21,1.21	0.128	0.839794	0.795	0.43,0.01,29.55	0.698	0.938	0.42,0.11,1.56	0.134	0.48,0.15,1.50	0.206	0.806	NA		0.08	0.0054
sVCAM	Endometrial (overall)	1	0.75,0.52,1.09	0.129	0.843673												0.21	0.0030
IL-16	Lung (overall)	4	1.07,0.98,1.18	0.132	0.843673	0.670	1.07,0.96,1.20	0.212	0.965	1.08,0.98,1.18	0.132	1.08,0.98,1.19	0.127	0.864	NA		1.00	0.0303
VEGF	Ovarian (mucinous, borderline & invasive)	1	6.35,0.57,70.41	0.132	0.843673												0.05	0.0003
sVCAM	Prostate (advanced)	1	0.77,0.56,1.08	0.133	0.843673												0.21	0.0030
TRAIL	Breast (luminal A)	4	0.70,0.44,1.11	0.134	0.845857	0.000	2.22,0.25,20.14	0.477	0.295	0.85,0.72,1.01	0.073	0.83,0.64,1.07	0.150	0.004	1 outlier(s)	0.85,0.77,0.95	0.75	0.0054
TNF-B	Ovarian (overall, invasive)	1	1.46,0.89,2.39	0.135	0.851111												0.14	0.0014
TRAIL	Breast (triple negative)	4	1.25,0.93,1.69	0.137	0.851196	0.566	2.45,0.57,10.47	0.227	0.356	1.40,0.95,2.35	0.145	1.30,0.88,1.92	0.183	0.566	NA		0.25	0.0054
IL-2ra	Lung (overall)	3	0.96,0.92,1.01	0.138	0.851196	0.598	1.01,0.91,1.12	0.859	0.322	0.97,0.76,1.07	0.142	0.97,0.92,1.02	0.191				1.00	0.1264
SCGFb	Endometrial (non-endometrioid)	1	0.47,0.17,1.28	0.139	0.851196												0.07	0.0040
SeSelectin	Ovarian (serous, borderline & invasive LG)	2	0.48,0.18,1.27	0.139	0.851196	0.797											0.13	0.0016
IL-1a	Lung (ever smokers)	1	1.58,0.86,2.91	0.141	0.8546												0.09	0.0011
IL-16	Lung (ever smokers)	4	1.09,0.97,1.23	0.144	0.85562	0.551	1.13,0.98,1.31	0.095	0.408	1.11,0.97,1.25	0.108	1.10,0.98,1.25	0.113	0.626	NA		0.87	0.0303
CTACK	Lung (small cell)	2	1.18,0.94,1.48	0.145	0.85562	0.614											0.49	0.0415
sICAM	Prostate (overall)	2	0.82,0.62,1.07	0.146	0.85562	0.128											0.60	0.0044
MIP1a	Ovarian (serous, borderline)	1	0.86,0.70,1.05	0.147	0.860237												0.55	0.0590
SCF	Breast (HER2 enriched)	1	3.36,0.64,17.53	0.151	0.864585												0.07	0.0004
SCF	Ovarian (serous, MA incl. CIMBA)	1	1.88,0.80,4.43	0.151	0.864585												0.08	0.0004
bNGF	Lung (overall)	1	1.32,0.90,1.92	0.153	0.872041												0.20	0.0018
MIP1b	Lung (adenocarcinoma)	3	0.73,0.48,1.12	0.153	0.872041	0.733	0.86,0.27,2.74	0.799	0.768			0.77,0.48,1.22	0.266				0.18	0.0031
IL-2ra	Ovarian (mucinous, borderline)	4	0.88,0.73,1.05	0.154	0.872041	0.553	0.84,0.60,1.19	0.336	0.809	0.88,0.71,1.12	0.155	0.87,0.71,1.06	0.165	0.630	NA		0.67	0.1296
IL-2ra	Prostate (high vs low+int risk)	4	0.96,0.91,1.01	0.154	0.872041	0.403	1.01,0.91,1.12	0.835	0.248	0.91,0.66,1.34	0.162	0.96,0.90,1.02	0.194	0.171	NA		1.00	0.1296
IL-8	Lung (squamous cell)	2	1.35,0.89,2.06	0.156	0.877203	0.448											0.20	0.0051
SCF	Breast (luminal B, HER2 neg.)	1	2.04,0.76,5.45	0.157	0.878196												0.08	0.0004
SCF	Ovarian (serous, invasive HG)	1	2.10,0.75,5.91	0.158	0.878196												0.07	0.0004
VEGF	Prostate (advanced)	1	2.18,0.73,6.51	0.161	0.884284												0.07	0.0003
SCF	Endometrial (endometrioid)	1	0.43,0.13,1.41	0.164	0.884284												0.06	0.0004
SCF	Endometrial (overall)	1	0.49,0.18,1.34	0.165	0.884284												0.07	0.0004
FGFBasic	Lung (small cell)	2	0.55,0.24,1.28	0.166	0.884284	0.471											0.07	0.0021
MIF	Lung (ever smokers)	3	0.89,0.75,1.05	0.168	0.884284	0.720	0.77,0.51,1.16	0.210	0.449	0.87,0.58,1.29	0.154	0.87,0.69,1.09	0.236				0.60	0.0153
MIF	Ovarian (serous, borderline & invasive LG)	4	0.81,0.60,1.09	0.17	0.884284	0.474	0.59,0.27,1.30	0.191	0.399	0.77,0.41,1.20	0.153	0.82,0.57,1.17	0.275	0.657	NA		0.77	0.0181
MIF	Breast (triple negative)	4	0.89,0.76,1.05	0.171	0.884284	0.754	0.97,0.64,1.47	0.886	0.676	0.89,0.64,1.45	0.217	0.92,0.76,1.10	0.357	0.788	NA		0.65	0.0181
MIP1a	Prostate (advanced)	1	1.06,0.98,1.14	0.172	0.884284												1.00	0.0590
SeSelectin	Ovarian (mucinous, borderline & invasive)	2	0.49,0.18,1.36	0.172	0.884284	0.945											0.07	0.0016
IL-1ra	Endometrial (endometrioid)	2	0.83,0.64,1.08	0.173	0.884284	0.174											0.58	0.0170
IL-1ra	Lung (overall)	2	0.92,0.81,1.04	0.173	0.884284	0.710											0.93	0.0170
IL-2ra	Lung (never smokers)	4	0.91,0.79,1.04	0.173	0.884284	0.836	0.97,0.75,1.27	0.842	0.530	0.90,0.35,2.72	0.181	0.92,0.79,1.07	0.268	0.805	NA		0.83	0.1296
SCGFb	Prostate (high vs low risk)	1	0.73,0.46,1.15	0.177	0.884284												0.14	0.0040
IL-18	Lung (adenocarcinoma)	2	0.82,0.61,1.10	0.178	0.884284	0.032											0.83	0.0243
IL-1ra	Lung (never smokers)	2	1.29,0.89,1.88	0.178	0.884284	0.950											0.18	0.0170
MCSF	Ovarian (mucinous, borderline & invasive)	3	1.25,0.90,1.74	0.178	0.884284	0.580	1.73,0.87,3.44	0.119	0.297			1.28,0.91,1.79	0.154				0.25	0.0176
IL-6	Ovarian (mucinous, borderline)	1	0.17,0.01,2.25	0.18	0.884284												0.05	0.0006
GROa	Lung (never smokers)	1	1.09,0.96,1.24	0.182	0.884284												0.82	0.1274
MIP1b	Ovarian (mucinous, borderline & invasive)	3	0.49,0.17,1.40	0.182	0.884284	0.178	1.61,0.07,38.74	0.768	0.430			0.55,0.22,1.35	0.193				0.08	0.0031
SCF	Ovarian Serous (invasive LG & HG)	1	1.98,0.73,5.39	0.182	0.884284												0.07	0.0004
MCP1	Ovarian Serous (invasive LG & HG)	3	1.91,0.73,4.97	0.185	0.884284	0.061	0.15,0.01,2.94	0.211	0.085	1.77,0.52,10404.03	0.023	1.80,0.00,43766.67	0.909				0.12	0.0015
MCSF	Ovarian (serous, borderline)	3	1.29,0.88,1.89	0.185	0.884284	0.519	1.04,0.47,2.31	0.920	0.545			1.27,0.86,1.88	0.237				0.21	0.0176
MIP1a	Endometrial (overall)	1	1.06,0.97,1.16	0.186	0.884284												1.00	0.0590
TNF-B	Breast (luminal B, HER2 neg.)	1	0.69,0.39,1.20	0.186	0.884284												0.14	0.0014
RANTES	Breast (luminal B, HER2 neg.)	1	0.86,0.68,1.08	0.188	0.884284												0.58	0.0091
IL-6	Ovarian (clearcell, invasive)	1	4.78,0.46,49.27	0.189	0.884284												0.05	0.0006
SCGFb	Ovarian (mucinous, invasive)	1	1.85,0.74,4.63	0.189	0.884284												0.08	0.0040
MCP1	Ovarian (serous, invasive HG)	3	1.87,0.73,4.82	0.192	0.884284	0.077	0.15,0.01,2.64	0.194	0.076	1.75,0.51,4226.84	0.028	1.77,0.00,32413.17	0.909				0.11	0.0015
bNGF	Ovarian (borderline)	1	1.84,0.73,4.63	0.195	0.884284												0.07	0.0018
IL-2ra	Breast (luminal B)	4	0.95,0.89,1.02	0.195	0.884284	0.410	1.05,0.92,1.20	0.477	0.094	0.96,0.69,1.04	0.303	0.97,0.90,1.04	0.394	0.360	NA		1.00	0.1296
SCGFb	Breast (luminal A)	1	1.13,0.94,1.35	0.195	0.884284												0.63	0.0040
SCGFb	Ovarian (mucinous, borderline & invasive)	1	1.58,0.79,3.17	0.195	0.884284												0.09	0.0040
IL-18	Breast (overall)	2	1.03,0.98,1.09	0.196	0.884284	0.456											1.00	0.0243
SCGFb	Ovarian (serous, invasive LG)	1	0.48,0.15,1.47	0.196	0.884284												0.07	0.0040
FGFBasic	Lung (adenocarcinoma)	2	0.69,0.39,1.22	0.197	0.884284	0.208											0.14	0.0021
VEGF	Ovarian Serous (invasive LG & HG)	1	0.44,0.13,1.53	0.197	0.884284												0.06	0.0003
MIG	Ovarian (borderline)	2	1.39,0.84,2.31	0.199	0.884284	0.258											0.16	0.0081
sVCAM	Ovarian (serous, invasive LG)	1	2.16,0.67,6.99	0.2	0.884284												0.06	0.0030
SCF	Prostate (high vs low risk)	1	2.70,0.59,12.43	0.202	0.884284												0.06	0.0004
IL-6	Breast (luminal B, HER2 neg.)	1	0.57,0.24,1.36	0.203	0.884284												0.08	0.0006
VEGF	Breast (overall)	1	1.37,0.84,2.24	0.204	0.884284												0.13	0.0003
MIF	Breast (luminal B, HER2 neg.)	4	0.90,0.77,1.06	0.207	0.884284	0.992	0.86,0.57,1.29	0.462	0.787	0.90,0.60,1.35	0.215	0.89,0.74,1.07	0.230	0.985	NA		0.86	0.0181
IL-6	Lung (never smokers)	1	3.84,0.47,31.18	0.208	0.884284												0.05	0.0006
MIP1a	Ovarian (endometrioid, invasive)	1	0.90,0.76,1.06	0.209	0.884284												0.69	0.0590
FGFBasic	Ovarian (clearcell, invasive)	2	2.11,0.66,6.78	0.21	0.884284	0.907											0.06	0.0021
IL-18	Prostate (advanced)	2	1.11,0.94,1.31	0.21	0.884284	0.168											0.91	0.0243
Eotaxin	Ovarian (clearcell, invasive)	1	0.53,0.20,1.43	0.211	0.884284												0.07	0.0030
IL-16	Breast (overall)	4	1.03,0.98,1.09	0.211	0.884284	0.407	1.01,0.95,1.08	0.648	0.339	1.02,0.98,1.07	0.394	1.02,0.97,1.08	0.363	0.309	NA		1.00	0.0303
TRAIL	Prostate (overall)	4	1.12,0.94,1.35	0.211	0.884284	0.274	1.28,0.44,3.72	0.648	0.804	1.22, NA, NA	0.083	1.17,0.94,1.45	0.170	0.362	NA		0.69	0.0054
MIG	Breast (luminal A)	2	0.92,0.81,1.05	0.212	0.884284	0.555											0.90	0.0081
IL-16	Lung (adenocarcinoma)	4	1.09,0.95,1.23	0.213	0.884284	0.640	1.09,0.93,1.28	0.278	0.901	1.09,0.96,1.22	0.213	1.08,0.94,1.23	0.285	0.685	NA		0.90	0.0303
IL-1ra	Breast (luminal B, HER2 neg.)	2	1.11,0.94,1.31	0.214	0.884284	0.308											0.84	0.0170
CTACK	Lung (ever smokers)	2	0.93,0.83,1.04	0.215	0.884284	0.643											0.95	0.0415
MCP1	Ovarian (overall, invasive)	3	1.54,0.78,3.02	0.215	0.884284	0.155	0.21,0.02,1.84	0.159	0.065	1.44,0.88,2.38	0.148	1.46,0.00,595.24	0.902				0.14	0.0015
MIP1a	Endometrial (endometrioid)	1	1.07,0.96,1.18	0.217	0.884284												0.98	0.0590
RANTES	Lung (ever smokers)	1	1.15,0.92,1.44	0.217	0.884284												0.40	0.0091
bNGF	Endometrial (non-endometrioid)	1	0.41,0.10,1.70	0.218	0.884284												0.06	0.0018
SCGFb	Ovarian (serous, invasive HG)	1	1.26,0.87,1.81	0.218	0.884284												0.23	0.0040
MIF	Lung (small cell)	4	0.82,0.60,1.13	0.22	0.888617	0.683	0.83,0.37,1.86	0.655	0.971	0.78,0.27,1.29	0.227	0.83,0.57,1.20	0.318	0.778	NA		0.25	0.0181
GROa	Endometrial (non-endometrioid)	1	0.90,0.76,1.07	0.222	0.888617												0.69	0.1274
TRAIL	Prostate (high vs low+int risk)	4	0.85,0.66,1.10	0.226	0.888617	0.606	0.86,0.25,3.01	0.815	0.989	0.85,0.66,1.46	0.356	0.88,0.63,1.23	0.461	0.602	NA		0.36	0.0054
MIF	Lung (squamous cell)	4	1.24,0.88,1.75	0.227	0.888617	0.034	0.82,0.35,1.93	0.656	0.303	1.14, NA, NA	0.225	1.16,0.91,1.47	0.245	0.061	NA		0.55	0.0174
MIG	Ovarian (clearcell, invasive)	2	1.48,0.78,2.78	0.227	0.888617	0.984											0.10	0.0081
VEGF	Ovarian (serous, invasive HG)	1	0.45,0.13,1.64	0.228	0.888617												0.06	0.0003
RANTES	Breast (luminal B)	1	0.85,0.65,1.11	0.229	0.888617												0.58	0.0091
sICAM	Prostate (high vs low risk)	2	1.32,0.84,2.08	0.229	0.888617	0.588											0.15	0.0044
SCF	Prostate (high vs low+int risk)	1	1.81,0.69,4.76	0.23	0.888617												0.07	0.0004
SCGFb	Lung (ever smokers)	1	1.24,0.87,1.75	0.23	0.888617												0.20	0.0040
sICAM	Ovarian (overall, invasive)	2	0.83,0.62,1.12	0.23	0.888617	0.665											0.32	0.0044
TNF-B	Ovarian (serous, invasive LG)	1	2.97,0.50,17.63	0.231	0.888617												0.06	0.0014
GROa	Lung (squamous cell)	1	1.04,0.97,1.12	0.232	0.888617												1.00	0.1274
IL-1a	Ovarian (serous, MA incl. CIMBA)	1	1.39,0.81,2.38	0.232	0.888617												0.11	0.0011
sICAM	Lung (adenocarcinoma)	2	0.80,0.56,1.15	0.233	0.888617	0.701											0.24	0.0044
RANTES	Prostate (advanced)	1	1.14,0.92,1.40	0.234	0.888617												0.52	0.0091
IL-1a	Endometrial (endometrioid)	1	1.56,0.75,3.27	0.237	0.894157												0.08	0.0011
sVCAM	Ovarian (mucinous, borderline & invasive)	1	0.65,0.32,1.33	0.237	0.894157												0.08	0.0030
IL-18	Prostate (high vs low risk)	2	1.11,0.93,1.32	0.239	0.898312	0.636											0.58	0.0243
TRAIL	Ovarian (mucinous, invasive)	4	0.57,0.23,1.45	0.239	0.898312	0.232	0.27,0.00,60.17	0.633	0.777	0.30,0.11,0.91	0.229	0.38,0.12,1.13	0.082	0.219	NA		0.08	0.0054
MIP1b	Ovarian (mucinous, borderline)	3	0.39,0.08,1.88	0.24	0.898926	0.169	3.50,0.07,178.44	0.532	0.239			0.51,0.14,1.90	0.314				0.07	0.0031
MCP1	Ovarian (serous, invasive LG)	3	2.90,0.49,17.25	0.241	0.900242	0.636	0.17,0.00,442.01	0.660	0.469	2.92,0.30,37.34	0.241	2.75,0.00,152207.96	0.856				0.06	0.0015
SCGFb	Ovarian (serous, MA incl. CIMBA)	1	1.20,0.88,1.62	0.243	0.900381												0.30	0.0040
sICAM	Ovarian (serous, borderline & invasive LG)	2	1.49,0.76,2.93	0.243	0.900381	0.304											0.26	0.0044
TNF-B	Ovarian (serous, borderline)	1	0.47,0.13,1.68	0.244	0.903432												0.06	0.0014
IL-1ra	Ovarian (mucinous, borderline)	2	0.76,0.47,1.21	0.247	0.905041	0.606											0.14	0.0170
CTACK	Ovarian (mucinous, borderline & invasive)	2	1.14,0.91,1.44	0.248	0.905041	0.560											0.51	0.0415
MCP1	Breast (HER2 enriched)	3	2.36,0.55,10.14	0.248	0.905041	0.110	57.91,0.12,28496.53	0.199	0.298	2.57,0.00,30.08	0.091	2.51,0.00,753563.11	0.886				0.11	0.0015
SCF	Lung (ever smokers)	1	0.56,0.21,1.50	0.249	0.905041												0.07	0.0004
GROa	Prostate (high vs low+int risk)	1	0.97,0.92,1.02	0.25	0.905041												1.00	0.1274
IL-1a	Prostate (high vs low risk)	1	1.65,0.70,3.90	0.25	0.905041												0.07	0.0011
MCP1	Ovarian (endometrioid, invasive)	3	1.87,0.64,5.48	0.252	0.905041	0.522	0.13,0.00,14.49	0.397	0.255	1.86,0.61,5.44	0.272	1.73,0.01,414.02	0.844				0.07	0.0015
sVCAM	Breast (overall)	1	0.92,0.80,1.06	0.252	0.905041												0.69	0.0030
IL-8	Prostate (high vs low+int risk)	2	0.74,0.44,1.24	0.253	0.905041	0.057											0.34	0.0051
MIP1b	Ovarian (mucinous, invasive)	3	0.54,0.19,1.55	0.253	0.905041	0.437	0.76,0.02,28.52	0.880	0.846			0.53,0.17,1.67	0.275				0.07	0.0031
TNF-B	Ovarian (serous, MA incl. CIMBA)	1	1.33,0.81,2.17	0.259	0.905041												0.13	0.0014
sVCAM	Prostate (high vs low+int risk)	1	0.84,0.61,1.14	0.26	0.905041												0.22	0.0030
IL-1ra	Ovarian (clearcell, invasive)	2	0.78,0.51,1.20	0.262	0.905041	0.397											0.16	0.0170
VEGF	Breast (HER2 enriched)	1	3.22,0.42,24.90	0.263	0.905041												0.06	0.0003
Eotaxin	Ovarian (mucinous, invasive)	1	1.77,0.65,4.81	0.264	0.905041												0.07	0.0030
IL-1ra	Ovarian (serous, invasive LG)	2	1.34,0.80,2.25	0.266	0.905041	0.891											0.13	0.0170
VEGF	Breast (luminal B)	1	2.24,0.54,9.23	0.266	0.905041												0.07	0.0003
VEGF	Lung (ever smokers)	1	2.02,0.58,7.02	0.266	0.905041												0.06	0.0003
IL-16	Breast (luminal B, HER2 neg.)	4	0.93,0.82,1.06	0.268	0.905041	0.843	0.90,0.78,1.05	0.196	0.500	0.93,0.80,1.04	0.268	0.93,0.82,1.06	0.276	0.468	NA		0.98	0.0303
MIP1a	Breast (HER2 enriched)	1	1.09,0.94,1.25	0.268	0.905041												1.00	0.0590
VEGF	Breast (luminal A)	1	1.44,0.76,2.73	0.268	0.905041												0.10	0.0003
Eotaxin	Lung (never smokers)	1	1.62,0.69,3.81	0.269	0.905041												0.07	0.0030
MIF	Ovarian (mucinous, invasive)	4	1.26,0.83,1.92	0.269	0.905041	0.545	1.53,0.52,4.51	0.438	0.706	1.34,0.62,3.47	0.250	1.31,0.80,2.13	0.282	0.651	NA		0.17	0.0181
MIG	Ovarian (overall, MA incl. CIMBA)	2	1.11,0.92,1.33	0.274	0.912465	0.791											0.65	0.0081
FGFBasic	Breast (luminal B, HER2 neg.)	2	0.79,0.52,1.21	0.276	0.912465	0.544											0.18	0.0021
CTACK	Ovarian (mucinous, invasive)	2	1.18,0.87,1.60	0.278	0.912465	0.556											0.32	0.0415
MCP1	Ovarian (serous, borderline & invasive LG)	3	1.81,0.62,5.28	0.279	0.912465	0.457	0.18,0.00,19.63	0.474	0.323	1.82,0.45,9.00	0.279	1.72,0.00,1373.09	0.873				0.12	0.0015
Eotaxin	Breast (luminal B, HER2 neg.)	1	1.23,0.84,1.80	0.28	0.912465												0.24	0.0030
MCSF	Breast (triple negative)	3	1.14,0.90,1.45	0.28	0.912465	0.132	1.41,0.83,2.41	0.206	0.374			1.16,0.97,1.38	0.101				0.64	0.0176
Eotaxin	Ovarian (mucinous, borderline & invasive)	1	1.52,0.71,3.24	0.281	0.912465												0.08	0.0030
IL-8	Ovarian (serous, invasive LG)	2	0.59,0.22,1.55	0.281	0.912465	0.671											0.07	0.0051
sVCAM	Breast (luminal A)	1	0.90,0.74,1.09	0.283	0.914505												0.50	0.0030
IL-2ra	Prostate (advanced)	4	0.97,0.91,1.03	0.285	0.917063	0.865	0.96,0.86,1.07	0.479	0.874	0.97,0.80,1.13	0.285	0.97,0.91,1.03	0.268	0.915	NA		1.00	0.1296
IL-2ra	Prostate (high vs low risk)	4	0.95,0.88,1.04	0.285	0.917063	0.490	1.01,0.86,1.18	0.935	0.438	0.96,0.60,1.83	0.374	0.95,0.87,1.05	0.344	0.298	NA		1.00	0.1296
IL-6	Ovarian (endometrioid, invasive)	1	2.49,0.47,13.27	0.286	0.919247												0.06	0.0006
MIP1a	Ovarian (mucinous, invasive)	1	1.13,0.90,1.42	0.287	0.919247												0.43	0.0590
MIP1b	Breast (luminal A)	3	1.12,0.91,1.39	0.287	0.919247	0.807	0.96,0.54,1.72	0.898	0.578			1.11,0.88,1.39	0.372				0.51	0.0031
IL-1ra	Lung (small cell)	2	0.84,0.61,1.16	0.29	0.921408	0.860											0.24	0.0170
SCGFb	Lung (overall)	1	1.16,0.88,1.53	0.294	0.924976												0.38	0.0040
IL-2ra	Ovarian (mucinous, invasive)	4	0.90,0.73,1.10	0.296	0.928608	0.200	1.13,0.84,1.54	0.421	0.077	0.74,0.32,1.18	0.305	0.88,0.73,1.07	0.194	0.094	NA		0.75	0.1296
bNGF	Prostate (advanced)	1	0.79,0.50,1.24	0.297	0.928608												0.15	0.0018
GROa	Endometrial (endometrioid)	1	1.04,0.97,1.11	0.3	0.928608												1.00	0.1274
IL-16	Ovarian (overall, invasive)	4	0.93,0.81,1.07	0.3	0.928608	0.164	0.94,0.77,1.16	0.581	0.801	0.95,0.83,1.04	0.340	0.93,0.84,1.04	0.236	0.599	NA		0.98	0.0303
sICAM	Breast (overall)	2	0.93,0.81,1.07	0.3	0.928608	0.716											0.84	0.0044
sICAM	Ovarian (serous, invasive HG)	2	0.83,0.58,1.18	0.301	0.928608	0.396											0.24	0.0044
IL-8	Ovarian (serous, invasive HG)	2	1.19,0.86,1.65	0.302	0.928608	0.845											0.27	0.0051
MCP1	Endometrial (non-endometrioid)	3	2.61,0.42,16.10	0.302	0.928608	0.345	0.21,0.00,10824.47	0.776	0.640	2.62,0.00,161935546.87	0.388	2.58,0.00,1264551.90	0.887				0.06	0.0015
TRAIL	Breast (luminal B, HER2 neg.)	4	0.85,0.62,1.16	0.303	0.928796	0.338	1.62,0.32,8.23	0.564	0.428	0.75,0.50,1.24	0.106	0.80,0.54,1.18	0.252	0.448	NA		0.38	0.0054
TRAIL	Ovarian (serous, borderline & invasive LG)	4	1.35,0.76,2.41	0.303	0.928796	0.356	1.97,0.07,59.23	0.697	0.826	1.35,0.43,2.37	0.471	1.29,0.61,2.70	0.508	0.406	NA		0.31	0.0054
sVCAM	Prostate (overall)	1	0.90,0.75,1.10	0.307	0.937979												0.45	0.0030
MIP1a	Lung (adenocarcinoma)	1	1.05,0.96,1.15	0.309	0.938455												1.00	0.0590
FGFBasic	Lung (ever smokers)	2	0.81,0.53,1.23	0.315	0.948447	0.643											0.13	0.0021
IL-6	Prostate (advanced)	1	1.50,0.68,3.34	0.317	0.950558												0.08	0.0006
IL-2ra	Ovarian (borderline)	4	0.94,0.84,1.06	0.318	0.950558	0.891	0.94,0.76,1.17	0.602	0.984	0.94,0.44,2.07	0.318	0.93,0.82,1.06	0.289	0.861	NA		0.97	0.1296
bNGF	Ovarian (clearcell, invasive)	1	1.94,0.53,7.17	0.32	0.950794												0.06	0.0018
SCGFb	Prostate (high vs low+int risk)	1	0.86,0.64,1.16	0.32	0.950794												0.28	0.0040
IL-6	Breast (triple negative)	1	0.64,0.26,1.55	0.321	0.950794												0.07	0.0006
MCSF	Lung (adenocarcinoma)	3	0.92,0.77,1.09	0.322	0.950794	0.367	0.94,0.55,1.60	0.822	0.908			0.91,0.75,1.11	0.369				0.70	0.0176
MIG	Prostate (high vs low risk)	2	1.18,0.85,1.62	0.323	0.950794	0.630											0.24	0.0081
CTACK	Ovarian (endometrioid, invasive)	2	1.12,0.90,1.39	0.325	0.950794	0.973											0.54	0.0415
MIP1b	Breast (HER2 enriched)	3	0.71,0.36,1.40	0.325	0.950794	0.567	0.44,0.07,2.80	0.382	0.580			0.64,0.30,1.33	0.231				0.19	0.0031
RANTES	Ovarian (mucinous, borderline)	1	0.72,0.37,1.40	0.329	0.950794												0.10	0.0091
TRAIL	Endometrial (endometrioid)	4	1.19,0.84,1.69	0.329	0.950794	0.885	1.43,0.26,7.86	0.680	0.828	1.27,0.70,2.03	0.312	1.23,0.79,1.92	0.363	0.911	NA		0.23	0.0054
MIP1a	Ovarian (clearcell, invasive)	1	0.89,0.71,1.12	0.33	0.950794												0.42	0.0590
MIP1b	Ovarian (endometrioid, invasive)	3	1.98,0.50,7.83	0.33	0.950794	0.041	1.48,0.01,285.44	0.883	0.908			2.12,0.88,5.10	0.093				0.09	0.0031
Eotaxin	Ovarian (serous, invasive LG)	1	1.81,0.55,6.00	0.331	0.950794												0.06	0.0030
TNF-B	Ovarian (mucinous, invasive)	1	2.08,0.48,9.05	0.331	0.950794												0.06	0.0014
sVCAM	Ovarian (endometrioid, invasive)	1	0.71,0.36,1.41	0.332	0.950794												0.09	0.0030
SCGFb	Breast (overall)	1	1.07,0.93,1.23	0.335	0.952741												0.81	0.0040
MIP1a	Ovarian (mucinous, borderline & invasive)	1	1.09,0.92,1.29	0.338	0.956811												0.66	0.0590
RANTES	Prostate (overall)	1	1.06,0.94,1.20	0.339	0.957819												0.89	0.0091
TNF-B	Prostate (overall)	1	0.87,0.65,1.16	0.339	0.957819												0.24	0.0014
MIP1a	Prostate (high vs low+int risk)	1	1.04,0.96,1.12	0.34	0.957858												1.00	0.0590
TRAIL	Ovarian (serous, MA incl. CIMBA)	4	0.88,0.68,1.14	0.347	0.964698	0.370	0.41,0.12,1.40	0.153	0.208	0.80, NA, NA	0.131	0.82,0.59,1.15	0.254	0.481	NA		0.38	0.0054
MCSF	Breast (luminal A)	3	0.96,0.88,1.05	0.348	0.964698	0.528	0.99,0.82,1.20	0.929	0.704			0.97,0.89,1.06	0.519				1.00	0.0176
TNF-B	Lung (small cell)	1	0.59,0.20,1.78	0.348	0.964698												0.06	0.0014
MIG	Lung (never smokers)	2	1.31,0.75,2.30	0.349	0.964698	0.812											0.11	0.0081
SeSelectin	Prostate (high vs low risk)	2	0.72,0.36,1.44	0.35	0.964698	0.493											0.09	0.0016
sICAM	Ovarian (serous, invasive LG)	2	1.68,0.57,5.00	0.35	0.964698	0.439											0.07	0.0044
IL-16	Lung (never smokers)	4	1.15,0.86,1.55	0.354	0.966422	0.693	1.08,0.75,1.56	0.668	0.575	1.15,0.82,1.56	0.354	1.13,0.83,1.54	0.431	0.833	NA		0.29	0.0303
IL-6	Ovarian (overall, invasive)	1	1.44,0.67,3.12	0.354	0.966422												0.08	0.0006
IL-8	Lung (never smokers)	2	1.41,0.68,2.93	0.356	0.968466	0.646											0.09	0.0051
RANTES	Ovarian (mucinous, borderline & invasive)	1	0.81,0.51,1.28	0.357	0.968466												0.15	0.0091
FGFBasic	Ovarian (serous, borderline)	2	1.60,0.59,4.33	0.358	0.968786	0.831											0.07	0.0021
SCF	Breast (luminal A)	1	0.78,0.46,1.32	0.358	0.968786												0.12	0.0004
MIF	Endometrial (non-endometrioid)	4	0.80,0.50,1.29	0.36	0.968786	0.361	1.30,0.35,4.87	0.696	0.435	0.88,0.25,1.98	0.610	0.81,0.47,1.39	0.442	0.579	NA		0.15	0.0181
MIP1a	Ovarian (borderline)	1	0.93,0.79,1.09	0.36	0.968786												0.73	0.0590
IL-18	Ovarian (mucinous, invasive)	2	1.17,0.83,1.64	0.363	0.97285	0.976											0.21	0.0243
MCSF	Ovarian (overall, MA incl. CIMBA)	3	1.06,0.93,1.21	0.364	0.97285	0.523	1.21,0.93,1.59	0.160	0.268			1.07,0.94,1.22	0.325				0.94	0.0176
TNF-B	Endometrial (endometrioid)	1	0.74,0.38,1.42	0.364	0.97285												0.10	0.0014
sICAM	Endometrial (non-endometrioid)	2	0.63,0.24,1.70	0.366	0.973525	0.910											0.07	0.0044
IL-6	Ovarian (serous, invasive LG)	1	0.28,0.02,4.56	0.368	0.973525												0.05	0.0006
FGFBasic	Prostate (high vs low+int risk)	2	0.82,0.52,1.28	0.372	0.973525	0.228											0.17	0.0021
MCSF	Ovarian (clearcell, invasive)	3	1.22,0.79,1.88	0.373	0.973525	0.737	0.89,0.36,2.22	0.803	0.442			1.20,0.71,2.01	0.495				0.16	0.0176
GROa	Ovarian (mucinous, borderline & invasive)	1	0.95,0.85,1.06	0.374	0.973525												0.93	0.1274
IL-18	Ovarian (mucinous, borderline & invasive)	2	1.12,0.87,1.45	0.375	0.973525	0.550											0.33	0.0243
VEGF	Ovarian (serous, borderline)	1	3.53,0.21,59.32	0.38	0.977091												0.05	0.0003
IL-1ra	Ovarian (mucinous, invasive)	2	1.21,0.79,1.85	0.381	0.977091	0.444											0.16	0.0170
MCP1	Endometrial (overall)	3	1.29,0.73,2.28	0.381	0.977091	0.465	1.10,0.04,27.55	0.953	0.922	1.84,0.01,125.51	0.373	1.18,0.02,75.93	0.939				0.13	0.0015
sICAM	Ovarian (overall, MA incl. CIMBA)	2	0.89,0.68,1.16	0.384	0.977091	0.592											0.41	0.0044
sVCAM	Prostate (high vs low risk)	1	0.81,0.49,1.32	0.388	0.977091												0.12	0.0030
sICAM	Ovarian (endometrioid, invasive)	2	0.75,0.39,1.44	0.389	0.977091	0.573											0.10	0.0044
CTACK	Ovarian (serous, borderline & invasive LG)	2	0.91,0.73,1.13	0.393	0.977091	0.398											0.98	0.0415
SCGFb	Ovarian Serous (invasive LG & HG)	1	1.17,0.82,1.66	0.393	0.977091												0.24	0.0040
FGFBasic	Prostate (advanced)	2	0.84,0.57,1.25	0.394	0.977091	0.722											0.16	0.0021
RANTES	Lung (small cell)	1	1.21,0.78,1.90	0.394	0.977091												0.15	0.0091
GROa	Ovarian (serous, borderline)	1	1.06,0.93,1.21	0.395	0.977091												0.86	0.1274
IL-1a	Ovarian (mucinous, borderline & invasive)	1	0.58,0.17,2.02	0.395	0.977091												0.06	0.0011
bNGF	Lung (squamous cell)	1	1.30,0.71,2.37	0.4	0.977091												0.10	0.0018
TRAIL	Lung (never smokers)	4	0.75,0.39,1.46	0.4	0.977091	0.899	0.49,0.02,12.92	0.666	0.790	0.75,0.30,2.41	0.401	0.83,0.35,1.92	0.657	0.909	NA		0.09	0.0054
FGFBasic	Endometrial (non-endometrioid)	2	0.48,0.09,2.64	0.401	0.977091	0.166											0.06	0.0021
IL-18	Breast (luminal B)	2	1.11,0.87,1.41	0.402	0.977091	0.110											0.94	0.0243
IL-8	Ovarian (endometrioid, invasive)	2	1.30,0.71,2.38	0.403	0.977091	0.855											0.11	0.0051
sICAM	Ovarian (serous, borderline)	2	1.40,0.63,3.10	0.403	0.977091	0.404											0.09	0.0044
IL-1a	Breast (luminal B)	1	1.36,0.66,2.82	0.407	0.977091												0.11	0.0011
IL-1a	Ovarian (mucinous, invasive)	1	0.50,0.10,2.57	0.407	0.977091												0.06	0.0011
TNF-B	Ovarian Serous (invasive LG & HG)	1	1.27,0.72,2.25	0.409	0.977091												0.11	0.0014
IL-6	Prostate (high vs low risk)	1	0.61,0.19,1.97	0.41	0.977091												0.06	0.0006
IL-18	Endometrial (non-endometrioid)	2	0.85,0.58,1.25	0.411	0.977091	0.933											0.19	0.0243
bNGF	Ovarian (serous, MA incl. CIMBA)	1	0.84,0.55,1.28	0.412	0.977091												0.16	0.0018
IL-1a	Prostate (advanced)	1	1.28,0.71,2.30	0.412	0.977091												0.11	0.0011
GROa	Lung (small cell)	1	0.95,0.85,1.07	0.413	0.977091												0.93	0.1274
RANTES	Ovarian (clearcell, invasive)	1	0.77,0.42,1.43	0.416	0.977091												0.11	0.0091
IL-16	Breast (luminal B)	4	1.07,0.90,1.27	0.418	0.977091	0.251	1.07,0.83,1.39	0.589	0.997	1.04,0.91,1.24	0.586	1.07,0.91,1.25	0.406	0.562	NA		0.98	0.0303
IL-2ra	Breast (overall)	4	0.99,0.95,1.02	0.42	0.977091	0.141	1.02,0.97,1.07	0.389	0.094	0.99,0.97,1.01	0.446	0.99,0.97,1.02	0.586	0.348	NA		1.00	0.1296
MIP1b	Breast (luminal B, HER2 neg.)	3	1.18,0.79,1.76	0.42	0.977091	0.604	1.05,0.35,3.16	0.926	0.828			1.13,0.73,1.75	0.575				0.24	0.0031
IL-1a	Endometrial (non-endometrioid)	1	2.10,0.34,12.92	0.422	0.977091												0.06	0.0011
TNF-B	Endometrial (overall)	1	0.80,0.45,1.39	0.423	0.977091												0.12	0.0014
IL-16	Prostate (high vs low risk)	4	1.09,0.88,1.35	0.424	0.977091	0.191	1.03,0.77,1.39	0.828	0.531	1.04,0.88,1.23	0.635	1.05,0.88,1.25	0.620	0.130	NA		0.67	0.0303
GROa	Prostate (high vs low risk)	1	0.97,0.90,1.05	0.425	0.977091												1.00	0.1274
TRAIL	Ovarian (clearcell, invasive)	4	0.56,0.14,2.31	0.425	0.977091	0.020	0.31,0.00,1385.21	0.785	0.887	0.22, NA, NA	0.066	0.51,0.15,1.75	0.284	0.045	No significant outliers		0.08	0.0054
GROa	Lung (overall)	1	1.02,0.97,1.06	0.426	0.977091												1.00	0.1274
IL-8	Prostate (advanced)	2	0.73,0.34,1.59	0.427	0.977091	0.008											0.33	0.0051
Eotaxin	Ovarian Serous (invasive LG & HG)	1	1.17,0.80,1.71	0.428	0.977091												0.19	0.0030
FGFBasic	Ovarian (serous, invasive HG)	2	1.20,0.76,1.88	0.429	0.977091	0.881											0.14	0.0021
TNF-B	Breast (luminal B)	1	1.30,0.67,2.52	0.431	0.977091												0.14	0.0014
TRAIL	Ovarian (serous, invasive HG)	4	0.88,0.65,1.20	0.431	0.977091	0.833	0.52,0.12,2.30	0.385	0.470	0.83,0.48,1.21	0.383	0.90,0.61,1.32	0.580	0.774	NA		0.29	0.0054
bNGF	Ovarian (mucinous, invasive)	1	1.67,0.46,6.05	0.435	0.977091												0.06	0.0018
CTACK	Ovarian (serous, borderline)	2	0.90,0.69,1.17	0.437	0.977091	0.489											0.41	0.0415
GROa	Prostate (advanced)	1	0.98,0.93,1.03	0.437	0.977091												1.00	0.1274
RANTES	Breast (triple negative)	1	0.91,0.72,1.15	0.439	0.977091												0.38	0.0091
IL-1a	Breast (HER2 enriched)	1	1.52,0.53,4.36	0.44	0.977091												0.10	0.0011
sICAM	Ovarian Serous (invasive LG & HG)	2	0.87,0.62,1.23	0.441	0.977091	0.519											0.25	0.0044
MIF	Ovarian (clearcell, invasive)	4	1.18,0.77,1.79	0.442	0.977091	0.812	1.45,0.49,4.29	0.507	0.691	1.18,0.47,4.19	0.442	1.21,0.74,1.96	0.445	0.886	NA		0.16	0.0181
IL-1a	Lung (squamous cell)	1	1.35,0.63,2.92	0.443	0.977091												0.08	0.0011
SCF	Ovarian (overall, MA incl. CIMBA)	1	1.35,0.63,2.91	0.446	0.977091												0.08	0.0004
MCSF	Ovarian (serous, MA incl. CIMBA)	3	1.06,0.92,1.22	0.447	0.977091	0.485	1.21,0.90,1.64	0.213	0.314			1.06,0.92,1.23	0.435				0.85	0.0176
CTACK	Prostate (high vs low risk)	2	0.94,0.81,1.10	0.448	0.977091	0.881											0.80	0.0415
MIG	Endometrial (endometrioid)	2	0.87,0.61,1.24	0.449	0.977091	0.209											0.32	0.0081
bNGF	Prostate (high vs low risk)	1	1.29,0.66,2.51	0.451	0.977091												0.09	0.0018
MIP1b	Lung (overall)	3	0.89,0.65,1.21	0.451	0.977091	0.372	1.39,0.60,3.22	0.442	0.259			0.92,0.66,1.29	0.632				0.30	0.0031
SeSelectin	Ovarian (overall, invasive)	2	0.84,0.54,1.31	0.452	0.977091	0.391											0.15	0.0016
IL-16	Ovarian (mucinous, invasive)	4	1.13,0.82,1.55	0.453	0.977091	0.473	1.13,0.73,1.76	0.570	0.968	1.12,0.82,1.55	0.478	1.15,0.83,1.60	0.402	0.634	NA		0.25	0.0303
IL-16	Ovarian (endometrioid, invasive)	4	0.92,0.73,1.15	0.454	0.977091	0.754	0.89,0.67,1.17	0.397	0.682	0.92,0.70,1.13	0.454	0.90,0.71,1.14	0.400	0.642	NA		0.42	0.0303
IL-18	Ovarian (overall, invasive)	2	1.05,0.93,1.19	0.454	0.977091	0.270											0.94	0.0243
IL-8	Ovarian Serous (invasive LG & HG)	2	1.13,0.82,1.55	0.456	0.977091	0.965											0.29	0.0051
SCGFb	Endometrial (endometrioid)	1	1.17,0.77,1.79	0.456	0.977091												0.18	0.0040
RANTES	Prostate (high vs low+int risk)	1	0.93,0.76,1.13	0.457	0.977091												0.54	0.0091
SCF	Endometrial (non-endometrioid)	1	2.95,0.17,51.09	0.457	0.977091												0.05	0.0004
Eotaxin	Lung (ever smokers)	1	0.87,0.60,1.26	0.459	0.977091												0.16	0.0029
FGFBasic	Ovarian (borderline)	2	1.36,0.60,3.04	0.461	0.977091	0.735											0.08	0.0021
FGFBasic	Ovarian (serous, invasive LG)	2	0.60,0.15,2.34	0.461	0.977091	0.770											0.06	0.0021
VEGF	Lung (overall)	1	1.44,0.54,3.84	0.462	0.977091												0.08	0.0003
MCSF	Lung (ever smokers)	3	1.06,0.90,1.25	0.465	0.977091	0.487	1.20,0.85,1.69	0.309	0.445			1.07,0.90,1.27	0.433				0.66	0.0176
MIF	Ovarian (overall, invasive)	4	0.93,0.78,1.12	0.467	0.977091	0.150	0.78,0.46,1.32	0.362	0.477	0.90,0.63,1.02	0.288	0.93,0.79,1.11	0.433	0.341	NA		0.86	0.0181
IL-16	Lung (squamous cell)	4	1.06,0.91,1.23	0.469	0.977091	0.798	1.09,0.91,1.31	0.346	0.544	1.06,0.29,2.26	0.469	1.06,0.91,1.24	0.472	0.456	NA		0.78	0.0297
IL-16	Ovarian (serous, invasive HG)	4	0.95,0.82,1.10	0.47	0.977091	0.256	0.98,0.81,1.20	0.881	0.517	0.97,0.85,1.10	0.658	0.96,0.84,1.09	0.532	0.528	NA		0.91	0.0303
SCF	Ovarian (clearcell, invasive)	1	2.62,0.19,35.86	0.47	0.977091												0.05	0.0004
MIG	Breast (luminal B, HER2 neg.)	2	0.92,0.72,1.16	0.472	0.977091	0.995											0.53	0.0081
MIG	Ovarian (overall, invasive)	2	1.08,0.88,1.33	0.472	0.977091	0.385											0.53	0.0081
SCF	Ovarian (mucinous, borderline)	1	0.34,0.02,6.27	0.472	0.977091												0.05	0.0004
IL-18	Lung (squamous cell)	2	0.93,0.76,1.14	0.473	0.977091	0.211											0.69	0.0243
sICAM	Lung (overall)	2	0.91,0.70,1.18	0.473	0.977091	0.759											0.41	0.0044
MIP1b	Ovarian (serous, invasive LG)	3	0.49,0.07,3.50	0.477	0.977091	0.092	0.08,0.00,61.26	0.459	0.570			0.32,0.08,1.32	0.116				0.06	0.0031
SeSelectin	Ovarian (mucinous, invasive)	2	0.41,0.04,4.81	0.479	0.977091	0.069											0.06	0.0016
FGFBasic	Breast (HER2 enriched)	2	0.77,0.37,1.59	0.481	0.977091	0.577											0.14	0.0021
IL-1a	Ovarian (serous, invasive LG)	1	0.49,0.07,3.54	0.482	0.977091												0.05	0.0011
IL-6	Ovarian (serous, borderline)	1	2.08,0.27,15.98	0.482	0.977091												0.05	0.0006
VEGF	Ovarian (overall, invasive)	1	0.68,0.23,1.99	0.482	0.977091												0.07	0.0003
VEGF	Ovarian (serous, invasive LG)	1	0.25,0.00,12.31	0.482	0.977091												0.05	0.0003
IL-18	Breast (triple negative)	2	1.05,0.92,1.19	0.485	0.977091	0.517											0.78	0.0243
MCP1	Prostate (high vs low+int risk)	3	0.84,0.51,1.38	0.488	0.977091	0.954	0.99,0.11,8.95	0.991	0.881	0.84,0.01,33.33	0.488	0.84,0.05,12.87	0.900				0.13	0.0015
IL-1ra	Ovarian (borderline)	2	0.90,0.66,1.22	0.489	0.977091	0.472											0.28	0.0170
sVCAM	Ovarian Serous (invasive LG & HG)	1	1.14,0.79,1.65	0.489	0.977091												0.19	0.0030
SCGFb	Ovarian (serous, borderline & invasive LG)	1	0.79,0.40,1.55	0.49	0.977091												0.24	0.0040
sVCAM	Ovarian (overall, MA incl. CIMBA)	1	0.91,0.68,1.20	0.49	0.977091												0.30	0.0030
IL-16	Lung (small cell)	4	0.92,0.73,1.16	0.491	0.977091	0.548	0.97,0.73,1.30	0.851	0.521	0.92,0.74,1.19	0.527	0.94,0.74,1.20	0.611	0.405	NA		0.38	0.0303
MIF	Ovarian (mucinous, borderline & invasive)	4	1.13,0.80,1.61	0.491	0.977091	0.292	1.54,0.56,4.24	0.399	0.513	1.21,0.79,2.48	0.288	1.13,0.78,1.63	0.521	0.524	NA		0.26	0.0181
MIP1a	Breast (luminal A)	1	0.98,0.94,1.03	0.494	0.977091												1.00	0.0590
sICAM	Lung (never smokers)	2	0.76,0.34,1.68	0.494	0.977091	0.877											0.08	0.0044
sVCAM	Lung (squamous cell)	1	0.85,0.54,1.34	0.494	0.977091												0.14	0.0030
SCGFb	Lung (adenocarcinoma)	1	1.14,0.78,1.67	0.495	0.977091												0.22	0.0040
IL-6	Ovarian (overall, MA incl. CIMBA)	1	1.27,0.64,2.51	0.496	0.977091												0.10	0.0006
IL-18	Ovarian (serous, invasive LG)	2	0.87,0.58,1.30	0.5	0.977091	0.577											0.16	0.0243
FGFBasic	Lung (overall)	2	0.89,0.64,1.24	0.501	0.977091	0.529											0.23	0.0021
GROa	Endometrial (overall)	1	0.98,0.92,1.04	0.503	0.977091												1.00	0.1274
sVCAM	Lung (overall)	1	0.91,0.68,1.21	0.507	0.977091												0.30	0.0030
MCP1	Ovarian (serous, MA incl. CIMBA)	3	1.35,0.56,3.27	0.509	0.977091	0.037	0.14,0.01,2.67	0.189	0.121	1.27,0.42,2509.29	0.129	1.28,0.00,982.39	0.942				0.14	0.0015
IL-1a	Ovarian (mucinous, borderline)	1	0.54,0.09,3.37	0.511	0.977091												0.06	0.0011
IL-1ra	Breast (luminal A)	2	1.03,0.95,1.12	0.512	0.977091	0.509											1.00	0.0170
IL-1a	Lung (overall)	1	1.17,0.73,1.90	0.513	0.977091												0.14	0.0011
IL-6	Ovarian (mucinous, invasive)	1	2.16,0.21,21.87	0.513	0.977091												0.05	0.0006
MCP1	Ovarian (serous, borderline)	3	1.55,0.42,5.68	0.513	0.977091	0.701	0.22,0.00,65.82	0.607	0.494	1.54,0.31,8.96	0.513	1.48,0.00,603.63	0.898				0.06	0.0015
sICAM	Lung (ever smokers)	2	0.90,0.64,1.25	0.513	0.977091	0.678											0.22	0.0044
IL-2ra	Prostate (overall)	4	0.99,0.96,1.02	0.515	0.977091	0.364	1.00,0.93,1.08	0.987	0.743	0.99,0.96,1.02	0.675	0.99,0.95,1.02	0.516	0.598	NA		1.00	0.1296
bNGF	Ovarian (serous, borderline)	1	1.46,0.47,4.52	0.516	0.977091												0.07	0.0018
SeSelectin	Ovarian Serous (invasive LG & HG)	2	0.84,0.51,1.41	0.516	0.977091	0.778											0.12	0.0016
VEGF	Prostate (high vs low risk)	1	0.59,0.12,2.90	0.516	0.977091												0.06	0.0003
GROa	Ovarian (endometrioid, invasive)	1	1.04,0.93,1.16	0.517	0.977091												0.95	0.1274
IL-1ra	Ovarian (serous, MA incl. CIMBA)	2	1.07,0.87,1.33	0.517	0.977091	0.129											0.83	0.0170
Eotaxin	Breast (HER2 enriched)	1	1.24,0.65,2.37	0.518	0.977091												0.18	0.0030
IL-16	Prostate (overall)	4	0.98,0.91,1.05	0.52	0.977091	0.567	1.01,0.93,1.09	0.868	0.237	0.98,0.92,1.06	0.580	0.99,0.92,1.06	0.744	0.200	NA		1.00	0.0303
CTACK	Ovarian (mucinous, borderline)	2	1.12,0.80,1.57	0.521	0.977091	0.772											0.27	0.0415
Eotaxin	Ovarian (serous, invasive HG)	1	1.14,0.77,1.69	0.521	0.977091												0.18	0.0030
GROa	Ovarian (serous, borderline & invasive LG)	1	1.04,0.93,1.15	0.523	0.977091												1.00	0.1274
IL-8	Breast (luminal A)	2	0.94,0.78,1.13	0.524	0.977091	0.259											0.73	0.0051
MIP1a	Ovarian (serous, invasive HG)	1	0.97,0.89,1.06	0.524	0.977091												1.00	0.0590
MCP1	Prostate (high vs low risk)	3	0.78,0.36,1.68	0.525	0.977091	0.525	0.15,0.01,4.45	0.275	0.331	0.78,0.34,1.67	0.525	0.74,0.00,112.87	0.908				0.08	0.0015
FGFBasic	Lung (squamous cell)	2	0.84,0.49,1.43	0.526	0.977091	0.715											0.11	0.0021
IL-16	Ovarian Serous (invasive LG & HG)	4	0.95,0.82,1.11	0.529	0.977091	0.193	0.99,0.79,1.22	0.895	0.588	0.98,0.85,1.09	0.695	0.96,0.84,1.09	0.540	0.559	NA		0.93	0.0303
IL-1a	Lung (adenocarcinoma)	2	0.85,0.50,1.43	0.532	0.977091	0.641											0.12	0.0017
IL-16	Ovarian (overall, MA incl. CIMBA)	4	0.96,0.85,1.09	0.533	0.977091	0.161	0.98,0.81,1.17	0.802	0.768	0.98,0.88,1.06	0.682	0.97,0.88,1.07	0.527	0.579	NA		1.00	0.0303
RANTES	Lung (adenocarcinoma)	1	0.93,0.73,1.18	0.533	0.977091												0.43	0.0091
TRAIL	Ovarian (overall, MA incl. CIMBA)	4	0.93,0.74,1.17	0.533	0.977091	0.885	0.64,0.21,1.93	0.429	0.498	0.89,0.61,1.22	0.479	0.91,0.69,1.21	0.519	0.871	NA		0.48	0.0054
MIP1a	Breast (luminal B, HER2 neg.)	1	0.97,0.89,1.06	0.535	0.977091												1.00	0.0590
SeSelectin	Lung (overall)	2	1.13,0.77,1.67	0.535	0.977091	0.984											0.18	0.0016
GROa	Breast (HER2 enriched)	1	1.03,0.94,1.13	0.536	0.977091												1.00	0.1274
IL-16	Ovarian (mucinous, borderline)	4	0.90,0.63,1.27	0.537	0.977091	0.866	0.94,0.61,1.45	0.786	0.694	0.90,0.62,1.31	0.538	0.91,0.63,1.31	0.599	0.922	NA		0.21	0.0303
IL-16	Breast (HER2 enriched)	4	1.10,0.80,1.52	0.538	0.977091	0.094	1.20,0.77,1.86	0.423	0.541	1.19,0.95,1.47	0.155	1.14,0.91,1.43	0.267	0.189	NA		0.92	0.0303
IL-1a	Ovarian (endometrioid, invasive)	1	0.69,0.21,2.26	0.538	0.977091												0.06	0.0011
bNGF	Ovarian (endometrioid, invasive)	1	1.34,0.53,3.40	0.54	0.977091												0.07	0.0018
MIG	Lung (overall)	2	1.06,0.88,1.28	0.541	0.977091	0.450											0.65	0.0081
sVCAM	Endometrial (non-endometrioid)	1	0.72,0.25,2.05	0.541	0.977091												0.07	0.0030
MIG	Prostate (advanced)	2	1.07,0.86,1.34	0.542	0.977091	0.547											0.48	0.0081
IL-16	Prostate (high vs low+int risk)	4	1.03,0.93,1.15	0.543	0.977091	0.745	1.01,0.89,1.15	0.866	0.577	1.03,0.90,1.14	0.545	1.03,0.92,1.15	0.660	0.458	NA		0.97	0.0303
SCGFb	Lung (squamous cell)	1	1.15,0.74,1.78	0.543	0.977091												0.17	0.0040
TNF-B	Endometrial (non-endometrioid)	1	1.64,0.33,8.13	0.544	0.977091												0.06	0.0014
TNF-B	Ovarian (mucinous, borderline & invasive)	1	0.71,0.24,2.14	0.544	0.977091												0.07	0.0014
VEGF	Breast (luminal B, HER2 neg.)	1	1.46,0.43,4.91	0.544	0.977091												0.07	0.0003
VEGF	Ovarian (clearcell, invasive)	1	2.71,0.11,67.89	0.545	0.977091												0.05	0.0003
Eotaxin	Lung (squamous cell)	1	1.15,0.73,1.83	0.548	0.977091												0.14	0.0030
IL-16	Endometrial (endometrioid)	4	0.96,0.83,1.10	0.548	0.977091	0.951	0.95,0.80,1.13	0.537	0.825	0.96,0.83,1.09	0.548	0.96,0.83,1.11	0.567	0.985	NA		0.83	0.0303
IL-1ra	Ovarian (serous, borderline & invasive LG)	2	1.10,0.81,1.49	0.548	0.977091	0.585											0.74	0.0170
IL-2ra	Endometrial (endometrioid)	4	1.02,0.95,1.10	0.549	0.977091	0.498	0.99,0.86,1.13	0.855	0.550	1.01,0.93,1.11	0.714	1.03,0.95,1.12	0.495	0.613	NA		1.00	0.1296
MIG	Breast (HER2 enriched)	2	1.13,0.75,1.70	0.55	0.977091	0.329											0.41	0.0081
VEGF	Ovarian (serous, MA incl. CIMBA)	1	0.72,0.25,2.10	0.55	0.977091												0.07	0.0003
GROa	Breast (luminal A)	1	1.01,0.98,1.04	0.552	0.977091												1.00	0.1274
IL-1a	Lung (small cell)	1	1.45,0.42,4.97	0.552	0.977091												0.06	0.0011
IL-18	Ovarian (serous, borderline & invasive LG)	2	0.93,0.73,1.19	0.555	0.977091	0.710											0.87	0.0243
IL-8	Prostate (high vs low risk)	2	0.76,0.31,1.89	0.556	0.977091	0.034											0.17	0.0051
MIF	Endometrial (overall)	4	0.95,0.81,1.12	0.556	0.977091	0.685	0.79,0.53,1.20	0.275	0.349	0.95,0.57,1.29	0.558	0.93,0.77,1.12	0.445	0.718	NA		0.81	0.0181
SCGFb	Prostate (advanced)	1	0.91,0.66,1.25	0.557	0.977091												0.27	0.0040
GROa	Prostate (overall)	1	0.99,0.96,1.02	0.558	0.977091												1.00	0.1274
MIF	Lung (never smokers)	4	0.89,0.62,1.30	0.558	0.977091	0.423	1.42,0.55,3.67	0.475	0.305	0.97,0.34,1.62	0.875	0.92,0.60,1.42	0.706	0.622	NA		0.19	0.0181
CTACK	Endometrial (non-endometrioid)	2	1.14,0.73,1.79	0.561	0.977091	0.169											0.29	0.0415
IL-2ra	Endometrial (non-endometrioid)	4	0.95,0.79,1.14	0.562	0.977091	0.422	1.05,0.73,1.51	0.794	0.517	0.80,0.29,3.23	0.463	1.00,0.81,1.24	0.979	0.190	NA		0.69	0.1296
SCGFb	Ovarian (mucinous, borderline)	1	1.35,0.49,3.76	0.562	0.977091												0.07	0.0040
SCGFb	Breast (triple negative)	1	1.11,0.78,1.57	0.563	0.977091												0.20	0.0040
MIG	Ovarian (serous, borderline & invasive LG)	2	1.17,0.69,1.97	0.565	0.977091	0.251											0.43	0.0081
MCP1	Lung (never smokers)	2	1.46,0.40,5.27	0.566	0.977091	0.868											0.06	0.0014
IL-2ra	Breast (triple negative)	4	0.98,0.92,1.05	0.567	0.977091	0.988	0.99,0.89,1.12	0.927	0.796	0.99,0.63,1.43	0.578	0.98,0.92,1.05	0.616	0.980	NA		1.00	0.1296
sVCAM	Ovarian (serous, borderline & invasive LG)	1	1.23,0.61,2.46	0.567	0.977091												0.19	0.0030
MCP1	Ovarian (overall, MA incl. CIMBA)	3	1.22,0.62,2.38	0.569	0.977091	0.095	0.18,0.03,1.23	0.080	0.045	1.15,0.65,2.07	0.508	1.16,0.02,71.47	0.944				0.17	0.0015
MIF	Breast (luminal B)	4	0.95,0.79,1.14	0.569	0.977091	0.957	0.96,0.59,1.55	0.861	0.962	0.95,0.63,1.65	0.571	0.95,0.77,1.18	0.657	0.973	NA		0.86	0.0181
MIG	Prostate (overall)	2	1.07,0.86,1.33	0.569	0.977091	0.088											0.85	0.0081
IL-1a	Ovarian (clearcell, invasive)	1	0.62,0.12,3.24	0.571	0.977091												0.06	0.0011
SeSelectin	Breast (luminal B)	2	0.84,0.47,1.52	0.573	0.977091	0.362											0.15	0.0016
MIG	Lung (ever smokers)	2	1.10,0.79,1.52	0.574	0.977091	0.174											0.36	0.0081
TNF-B	Lung (squamous cell)	1	0.82,0.40,1.65	0.574	0.977091												0.09	0.0014
MCSF	Lung (overall)	3	1.04,0.91,1.18	0.576	0.977091	0.716	1.08,0.82,1.42	0.573	0.733			1.04,0.91,1.18	0.565				0.93	0.0176
SCF	Ovarian (overall, invasive)	1	1.28,0.54,3.05	0.577	0.977091												0.08	0.0004
SCF	Lung (squamous cell)	1	1.42,0.41,4.92	0.578	0.977091												0.06	0.0004
SeSelectin	Lung (ever smokers)	2	1.15,0.70,1.88	0.578	0.977091	0.556											0.11	0.0016
MCSF	Prostate (high vs low+int risk)	3	1.04,0.90,1.20	0.579	0.977091	0.422	0.88,0.65,1.18	0.385	0.196			1.03,0.88,1.20	0.695				0.82	0.0176
IL-8	Ovarian (mucinous, borderline)	2	1.30,0.51,3.34	0.581	0.977091	0.562											0.08	0.0051
MIG	Ovarian (serous, borderline)	2	1.17,0.67,2.03	0.583	0.977091	0.386											0.12	0.0081
bNGF	Lung (small cell)	1	0.77,0.29,1.99	0.584	0.977091												0.07	0.0018
IL-2ra	Lung (ever smokers)	3	0.98,0.92,1.05	0.584	0.977091	0.296	1.07,0.94,1.22	0.291	0.128	0.99,0.74,1.05	0.898	0.99,0.93,1.06	0.811				1.00	0.1264
bNGF	Prostate (high vs low+int risk)	1	0.89,0.58,1.36	0.585	0.977091												0.15	0.0018
sICAM	Lung (squamous cell)	2	0.89,0.59,1.35	0.585	0.977091	0.816											0.18	0.0044
TRAIL	Ovarian (mucinous, borderline & invasive)	4	0.80,0.36,1.78	0.585	0.977091	0.135	0.53,0.00,60.06	0.793	0.862	0.46,0.21,1.25	0.115	0.76,0.33,1.73	0.508	0.155	NA		0.11	0.0054
FGFBasic	Breast (luminal B)	2	0.87,0.53,1.43	0.586	0.977091	0.978											0.18	0.0021
IL-1a	Ovarian (serous, borderline)	1	1.49,0.35,6.35	0.586	0.977091												0.06	0.0011
IL-2ra	Ovarian (serous, invasive HG)	4	0.98,0.92,1.05	0.587	0.977091	0.945	0.97,0.86,1.09	0.598	0.780	0.98,0.65,1.55	0.593	0.98,0.91,1.05	0.563	0.957	NA		1.00	0.1296
RANTES	Prostate (high vs low risk)	1	0.92,0.67,1.25	0.588	0.977091												0.26	0.0091
CTACK	Breast (luminal B)	2	1.04,0.91,1.19	0.589	0.977091	0.904											1.00	0.0415
IL-1a	Ovarian (overall, MA incl. CIMBA)	1	1.14,0.71,1.85	0.589	0.977091												0.14	0.0011
MCSF	Breast (HER2 enriched)	3	1.08,0.82,1.43	0.59	0.977091	0.974	1.14,0.63,2.07	0.662	0.836			1.08,0.81,1.45	0.591				0.72	0.0176
MIP1b	Prostate (high vs low+int risk)	3	0.91,0.65,1.28	0.59	0.977091	0.562	0.58,0.23,1.48	0.256	0.313			0.90,0.62,1.30	0.565				0.23	0.0031
MCP1	Ovarian (mucinous, invasive)	3	0.67,0.15,2.91	0.591	0.977091	0.991	0.87,0.00,522.51	0.966	0.933	0.66,0.00,37098.93	0.591	0.67,0.00,418.83	0.903				0.06	0.0015
CTACK	Lung (squamous cell)	2	0.96,0.83,1.11	0.592	0.977091	0.611											0.90	0.0415
IL-2ra	Lung (squamous cell)	4	0.97,0.86,1.09	0.592	0.977091	0.070	1.04,0.81,1.33	0.782	0.530	0.99,0.65,1.09	0.851	0.98,0.90,1.07	0.632	0.110	NA		1.00	0.1296
SeSelectin	Ovarian (serous, borderline)	2	0.73,0.23,2.33	0.592	0.977091	0.402											0.06	0.0016
TNF-B	Ovarian (serous, invasive HG)	1	1.17,0.65,2.12	0.592	0.977091												0.11	0.0014
IL-6	Endometrial (non-endometrioid)	1	2.00,0.16,25.53	0.593	0.977091												0.05	0.0006
IL-6	Lung (small cell)	1	1.60,0.28,9.18	0.598	0.983229												0.06	0.0006
bNGF	Breast (luminal B, HER2 neg.)	1	0.88,0.54,1.44	0.602	0.983229												0.16	0.0018
CTACK	Lung (adenocarcinoma)	2	1.03,0.91,1.17	0.602	0.983229	0.746											0.97	0.0415
IL-1a	Breast (luminal B, HER2 neg.)	1	1.18,0.63,2.20	0.604	0.983229												0.11	0.0011
MCP1	Lung (adenocarcinoma)	2	0.85,0.47,1.55	0.604	0.983229	0.514											0.11	0.0014
IL-8	Ovarian (borderline)	2	1.17,0.65,2.11	0.606	0.983229	0.953											0.12	0.0051
sVCAM	Breast (luminal B)	1	0.90,0.59,1.37	0.61	0.98479												0.24	0.0030
FGFBasic	Ovarian Serous (invasive LG & HG)	2	1.12,0.72,1.73	0.612	0.98479	0.827											0.15	0.0021
IL-8	Ovarian (serous, borderline & invasive LG)	2	0.86,0.48,1.55	0.612	0.98479	0.502											0.30	0.0051
MIP1b	Breast (overall)	3	1.04,0.89,1.22	0.614	0.98479	0.715	1.07,0.69,1.65	0.767	0.904			1.04,0.87,1.23	0.670				0.70	0.0031
SCGFb	Breast (luminal B)	1	0.90,0.60,1.35	0.615	0.98479												0.30	0.0040
TNF-B	Lung (overall)	1	0.89,0.58,1.39	0.615	0.98479												0.16	0.0014
IL-18	Ovarian (overall, MA incl. CIMBA)	2	1.03,0.93,1.13	0.616	0.98479	0.373											0.98	0.0243
VEGF	Lung (squamous cell)	1	1.50,0.31,7.20	0.616	0.98479												0.06	0.0003
IL-1ra	Prostate (high vs low+int risk)	2	1.04,0.90,1.19	0.617	0.98479	0.592											0.81	0.0170
CTACK	Ovarian (serous, MA incl. CIMBA)	2	1.03,0.92,1.15	0.621	0.988195	0.257											1.00	0.0415
SCGFb	Ovarian (borderline)	1	1.18,0.61,2.28	0.622	0.988195												0.10	0.0040
IL-16	Ovarian (serous, invasive LG)	4	0.91,0.64,1.31	0.629	0.989298	0.542	0.92,0.58,1.46	0.717	0.979	0.91,0.61,1.30	0.629	0.89,0.61,1.29	0.535	0.602	NA		0.19	0.0303
TNF-B	Breast (HER2 enriched)	1	0.79,0.30,2.05	0.629	0.989298												0.11	0.0014
RANTES	Ovarian (borderline)	1	0.90,0.58,1.39	0.631	0.989298												0.17	0.0091
FGFBasic	Ovarian (serous, MA incl. CIMBA)	2	1.11,0.73,1.69	0.634	0.989298	0.257											0.18	0.0021
IL-1a	Breast (luminal A)	1	0.92,0.67,1.28	0.635	0.989298												0.22	0.0011
VEGF	Prostate (high vs low+int risk)	1	1.28,0.46,3.57	0.635	0.989298												0.07	0.0003
TRAIL	Ovarian (mucinous, borderline)	4	1.23,0.52,2.92	0.637	0.989298	0.389	1.36,0.01,235.74	0.908	0.970	1.61,0.29,4.07	0.708	1.16,0.37,3.61	0.798	0.491	NA		0.08	0.0054
GROa	Lung (ever smokers)	1	0.99,0.93,1.04	0.641	0.989298												1.00	0.1274
TNF-B	Lung (ever smokers)	1	0.88,0.50,1.53	0.641	0.989298												0.10	0.0014
FGFBasic	Prostate (overall)	2	1.06,0.84,1.33	0.642	0.989298	0.779											0.34	0.0021
MCSF	Ovarian (serous, invasive HG)	3	0.96,0.81,1.14	0.642	0.989298	0.371	1.17,0.81,1.68	0.402	0.230			0.97,0.81,1.15	0.693				0.71	0.0176
CTACK	Breast (luminal A)	2	1.01,0.96,1.08	0.643	0.989298	0.790											1.00	0.0415
Eotaxin	Ovarian (overall, invasive)	1	1.08,0.78,1.51	0.643	0.989298												0.23	0.0030
MIP1b	Lung (squamous cell)	3	0.89,0.54,1.46	0.643	0.989298	0.972	0.98,0.26,3.77	0.978	0.876			0.90,0.53,1.54	0.704				0.14	0.0031
IL-18	Breast (luminal A)	2	1.02,0.95,1.09	0.644	0.989298	0.823											1.00	0.0243
sICAM	Lung (small cell)	2	0.86,0.44,1.66	0.644	0.989298	0.545											0.10	0.0044
MIG	Ovarian (serous, invasive LG)	2	1.19,0.56,2.55	0.647	0.989298	0.439											0.09	0.0081
IL-1a	Breast (overall)	1	1.06,0.83,1.36	0.648	0.989298												0.31	0.0011
MIP1a	Ovarian (mucinous, borderline)	1	1.06,0.82,1.37	0.648	0.989298												0.37	0.0590
bNGF	Breast (HER2 enriched)	1	1.21,0.52,2.82	0.65	0.989298												0.13	0.0018
SeSelectin	Ovarian (borderline)	2	0.70,0.15,3.26	0.65	0.989298	0.103											0.07	0.0016
CTACK	Ovarian (overall, MA incl. CIMBA)	2	1.02,0.93,1.12	0.656	0.989298	0.439											1.00	0.0415
sVCAM	Lung (adenocarcinoma)	1	0.91,0.62,1.36	0.656	0.989298												0.18	0.0030
TRAIL	Breast (HER2 enriched)	4	0.89,0.54,1.47	0.656	0.989298	0.981	0.68,0.06,7.85	0.758	0.825	0.85,0.41,1.90	0.650	0.86,0.47,1.59	0.639	0.984	NA		0.29	0.0054
FGFBasic	Ovarian (overall, MA incl. CIMBA)	2	1.08,0.77,1.53	0.657	0.989298	0.300											0.23	0.0021
IL-18	Endometrial (overall)	2	1.03,0.90,1.17	0.658	0.989298	0.828											0.91	0.0243
MIF	Ovarian (endometrioid, invasive)	4	0.93,0.69,1.26	0.658	0.989298	0.937	0.85,0.39,1.86	0.692	0.807	0.93,0.41,1.90	0.658	0.93,0.66,1.31	0.681	0.966	NA		0.28	0.0181
sICAM	Ovarian (serous, MA incl. CIMBA)	2	0.94,0.69,1.26	0.659	0.989298	0.469											0.32	0.0044
sVCAM	Breast (luminal B, HER2 neg.)	1	0.92,0.64,1.32	0.66	0.989298												0.24	0.0030
SeSelectin	Ovarian (clearcell, invasive)	2	1.35,0.35,5.17	0.663	0.989298	0.416											0.06	0.0016
SCF	Ovarian (mucinous, invasive)	1	1.77,0.13,23.71	0.665	0.989298												0.05	0.0004
IL-1ra	Ovarian Serous (invasive LG & HG)	2	1.07,0.80,1.43	0.666	0.989298	0.075											0.72	0.0170
RANTES	Ovarian (mucinous, invasive)	1	0.87,0.47,1.61	0.667	0.989298												0.11	0.0091
SeSelectin	Prostate (advanced)	2	1.11,0.69,1.78	0.667	0.989298	0.521											0.14	0.0016
sICAM	Prostate (advanced)	2	1.07,0.78,1.46	0.667	0.989298	0.500											0.29	0.0044
MIG	Ovarian (serous, MA incl. CIMBA)	2	1.05,0.85,1.29	0.668	0.989298	0.873											0.52	0.0081
SeSelectin	Breast (overall)	2	0.96,0.78,1.17	0.673	0.989298	0.683											0.45	0.0016
SeSelectin	Prostate (high vs low+int risk)	2	0.83,0.34,2.01	0.673	0.989298	0.044											0.14	0.0016
sICAM	Ovarian (borderline)	2	1.15,0.60,2.19	0.673	0.989298	0.441											0.11	0.0044
CTACK	Breast (overall)	2	0.99,0.95,1.04	0.674	0.989298	0.464											1.00	0.0415
sVCAM	Ovarian (serous, invasive HG)	1	1.08,0.74,1.59	0.676	0.989298												0.18	0.0030
MIF	Ovarian (borderline)	4	1.06,0.79,1.43	0.677	0.989298	0.923	1.05,0.49,2.25	0.907	0.963	1.06,0.39,1.81	0.677	1.10,0.78,1.54	0.589	0.931	NA		0.30	0.0181
IL-1a	Lung (never smokers)	1	0.74,0.17,3.13	0.678	0.989298												0.06	0.0011
IL-2ra	Breast (luminal A)	4	0.99,0.96,1.03	0.679	0.989298	0.892	0.99,0.93,1.05	0.762	0.926	0.99,0.79,1.20	0.728	0.99,0.95,1.02	0.431	0.815	NA		1.00	0.1296
FGFBasic	Ovarian (overall, invasive)	2	1.08,0.74,1.58	0.68	0.989298	0.832											0.18	0.0021
GROa	Ovarian (borderline)	1	0.98,0.88,1.09	0.68	0.989298												0.97	0.1274
MIP1b	Prostate (advanced)	3	0.89,0.51,1.55	0.681	0.989298	0.099	0.35,0.13,0.93	0.035	0.044			0.86,0.58,1.29	0.475				0.22	0.0031
bNGF	Ovarian (serous, borderline & invasive LG)	1	1.22,0.48,3.10	0.683	0.989298												0.14	0.0018
SCF	Breast (luminal B)	1	0.78,0.24,2.52	0.683	0.989298												0.08	0.0004
SeSelectin	Breast (luminal B, HER2 neg.)	2	1.11,0.67,1.83	0.683	0.989298	0.340											0.15	0.0016
MIP1b	Lung (small cell)	3	1.38,0.29,6.55	0.686	0.989298	0.022	20.14,2.34,173.16	0.006	0.009			1.46,0.59,3.59	0.414				0.08	0.0031
sVCAM	Lung (ever smokers)	1	1.08,0.75,1.54	0.687	0.989298												0.16	0.0030
IL-18	Breast (luminal B, HER2 neg.)	2	1.03,0.90,1.17	0.69	0.989298	0.912											0.94	0.0243
MCP1	Ovarian (borderline)	3	1.24,0.43,3.58	0.69	0.989298	0.791	3.45,0.04,338.20	0.597	0.653	1.25,0.00,871.70	0.690	1.26,0.02,101.84	0.917				0.07	0.0015
SCF	Ovarian (serous, borderline & invasive LG)	1	1.46,0.22,9.59	0.692	0.989298												0.07	0.0004
FGFBasic	Endometrial (overall)	2	1.23,0.44,3.39	0.693	0.989298	0.019											0.16	0.0021
IL-6	Prostate (overall)	1	0.91,0.57,1.45	0.693	0.989298												0.13	0.0006
IL-8	Prostate (overall)	2	0.91,0.55,1.49	0.693	0.989298	0.004											0.67	0.0051
SeSelectin	Lung (never smokers)	2	1.27,0.39,4.14	0.695	0.989298	0.986											0.06	0.0016
IL-2ra	Ovarian Serous (invasive LG & HG)	4	0.99,0.93,1.05	0.696	0.989298	0.934	0.98,0.87,1.10	0.692	0.826	0.99,0.70,1.62	0.716	0.99,0.92,1.06	0.712	0.923	NA		1.00	0.1296
IL-1a	Ovarian (overall, invasive)	1	0.90,0.52,1.55	0.699	0.989298												0.11	0.0011
IL-2ra	Ovarian (overall, invasive)	4	0.99,0.94,1.04	0.7	0.989298	0.847	1.01,0.92,1.12	0.786	0.570	0.99,0.61,1.27	0.703	1.00,0.95,1.06	0.930	0.786	NA		1.00	0.1296
MIP1b	Ovarian (serous, invasive HG)	3	1.09,0.71,1.65	0.701	0.989298	0.565	1.67,0.53,5.25	0.379	0.427			1.14,0.73,1.80	0.566				0.18	0.0031
MIP1b	Ovarian (serous, borderline)	3	1.38,0.27,7.15	0.703	0.989298	0.045	11.03,0.11,1079.73	0.305	0.339			1.87,0.66,5.32	0.242				0.08	0.0031
MCP1	Lung (overall)	2	1.11,0.64,1.93	0.707	0.989298	0.199											0.17	0.0014
MCSF	Breast (luminal B)	3	1.04,0.86,1.26	0.71	0.989298	0.784	1.17,0.78,1.76	0.448	0.508			1.04,0.86,1.27	0.679				0.85	0.0176
bNGF	Ovarian (overall, invasive)	1	1.08,0.70,1.67	0.712	0.989298												0.16	0.0018
IL-18	Ovarian (clearcell, invasive)	2	0.94,0.67,1.32	0.712	0.989298	0.636											0.20	0.0243
IL-2ra	Ovarian (serous, invasive LG)	4	1.04,0.85,1.26	0.713	0.989298	0.549	1.07,0.74,1.56	0.703	0.825	1.03,0.80,1.29	0.715	1.05,0.85,1.30	0.648	0.663	NA		0.62	0.1296
MIF	Ovarian Serous (invasive LG & HG)	4	0.95,0.72,1.25	0.713	0.989298	0.031	0.72,0.33,1.55	0.397	0.438	0.97,0.54,1.03	0.721	0.96,0.79,1.17	0.714	0.154	NA		0.75	0.0181
TNF-B	Breast (luminal A)	1	1.06,0.79,1.42	0.713	0.989298												0.27	0.0014
TNF-B	Breast (triple negative)	1	0.90,0.51,1.59	0.714	0.989298												0.10	0.0014
TNF-B	Ovarian (endometrioid, invasive)	1	1.22,0.42,3.55	0.714	0.989298												0.07	0.0014
GROa	Ovarian (mucinous, invasive)	1	1.03,0.88,1.19	0.716	0.989298												0.75	0.1274
SCF	Lung (never smokers)	1	1.55,0.15,16.31	0.717	0.989298												0.05	0.0004
IL-8	Lung (ever smokers)	2	0.94,0.68,1.31	0.718	0.989298	0.482											0.25	0.0051
SeSelectin	Prostate (overall)	2	1.05,0.80,1.38	0.718	0.989298	0.378											0.27	0.0016
IL-6	Ovarian (mucinous, borderline & invasive)	1	0.73,0.13,4.17	0.719	0.989298												0.06	0.0006
Eotaxin	Ovarian (endometrioid, invasive)	1	1.14,0.55,2.34	0.72	0.989298												0.09	0.0030
IL-18	Breast (HER2 enriched)	2	1.04,0.84,1.30	0.72	0.989298	0.426											0.85	0.0243
bNGF	Lung (never smokers)	1	1.23,0.39,3.87	0.721	0.989298												0.06	0.0018
SeSelectin	Ovarian (overall, MA incl. CIMBA)	2	0.91,0.54,1.54	0.721	0.989298	0.178											0.19	0.0016
SeSelectin	Ovarian (serous, MA incl. CIMBA)	2	0.92,0.60,1.43	0.722	0.989298	0.377											0.15	0.0016
FGFBasic	Ovarian (endometrioid, invasive)	2	0.74,0.14,3.95	0.723	0.989298	0.040											0.08	0.0021
IL-2ra	Ovarian (clearcell, invasive)	4	0.96,0.78,1.19	0.723	0.989298	0.185	1.08,0.69,1.69	0.746	0.560	0.99,0.78,1.26	0.862	0.96,0.80,1.16	0.706	0.291	NA		0.74	0.1296
CTACK	Prostate (advanced)	2	0.97,0.80,1.17	0.724	0.989298	0.057											0.99	0.0415
GROa	Lung (adenocarcinoma)	1	0.99,0.93,1.05	0.724	0.989298												1.00	0.1274
IL-2ra	Ovarian (overall, MA incl. CIMBA)	4	0.99,0.95,1.04	0.724	0.989298	0.892	1.02,0.93,1.11	0.658	0.453	0.99,0.65,1.25	0.726	0.99,0.94,1.05	0.802	0.856	NA		1.00	0.1296
MIG	Lung (adenocarcinoma)	2	1.05,0.81,1.36	0.724	0.989298	0.841											0.39	0.0081
IL-16	Breast (luminal A)	4	1.01,0.94,1.09	0.726	0.989298	0.350	1.01,0.91,1.12	0.890	0.870	1.00,0.94,1.07	1.000	1.01,0.94,1.08	0.807	0.700	NA		1.00	0.0303
IL-2ra	Ovarian (serous, MA incl. CIMBA)	4	0.99,0.94,1.04	0.728	0.989298	0.979	0.99,0.90,1.10	0.911	0.928	0.99,0.72,1.49	0.738	0.99,0.94,1.05	0.752	0.977	NA		1.00	0.1296
MIP1a	Breast (overall)	1	0.99,0.96,1.03	0.729	0.989298												1.00	0.0590
IL-8	Breast (HER2 enriched)	2	0.91,0.54,1.54	0.73	0.989298	0.380											0.28	0.0051
Eotaxin	Ovarian (serous, borderline & invasive LG)	1	1.13,0.55,2.32	0.735	0.989298												0.19	0.0030
MIF	Ovarian (mucinous, borderline)	4	1.08,0.68,1.72	0.736	0.989298	0.534	1.79,0.54,5.92	0.338	0.370	1.16,0.23,2.50	0.694	1.12,0.66,1.92	0.678	0.632	NA		0.15	0.0181
MIP1a	Ovarian Serous (invasive LG & HG)	1	0.99,0.90,1.08	0.736	0.989298												1.00	0.0590
IL-2ra	Endometrial (overall)	4	1.01,0.95,1.08	0.737	0.989298	0.363	1.00,0.87,1.16	0.963	0.904	1.01, NA, NA	0.725	1.02,0.95,1.10	0.594	0.307	NA		1.00	0.1296
SCF	Breast (overall)	1	0.93,0.63,1.39	0.738	0.989298												0.15	0.0004
VEGF	Ovarian (serous, borderline & invasive LG)	1	1.49,0.14,15.41	0.738	0.989298												0.06	0.0003
IL-2ra	Ovarian (endometrioid, invasive)	4	1.02,0.91,1.15	0.742	0.989298	0.913	1.03,0.83,1.28	0.808	0.938	1.05,0.48,2.33	0.738	1.03,0.90,1.17	0.687	0.856	NA		0.95	0.1296
GROa	Breast (luminal B, HER2 neg.)	1	1.01,0.95,1.07	0.743	0.989298												1.00	0.1274
sVCAM	Lung (small cell)	1	1.13,0.55,2.30	0.743	0.989298												0.08	0.0030
IL-6	Ovarian (serous, borderline & invasive LG)	1	1.31,0.24,7.08	0.75	0.989298												0.08	0.0006
MCP1	Ovarian (mucinous, borderline & invasive)	3	0.82,0.24,2.83	0.75	0.989298	0.296	13.36,0.09,2049.18	0.313	0.263	0.82,0.00,6.30	0.698	0.86,0.00,47894796294964.16	0.993				0.07	0.0015
IL-2ra	Breast (luminal B, HER2 neg.)	4	0.99,0.93,1.05	0.752	0.989298	0.791	0.99,0.88,1.10	0.802	0.925	0.99,0.93,1.07	0.777	0.99,0.93,1.05	0.718	0.865	NA		1.00	0.1296
IL-2ra	Lung (adenocarcinoma)	4	0.99,0.93,1.06	0.754	0.989298	0.892	1.03,0.91,1.17	0.629	0.442	0.99,0.54,1.41	0.775	1.00,0.93,1.07	0.923	0.903	NA		1.00	0.1296
GROa	Ovarian (overall, MA incl. CIMBA)	1	1.01,0.96,1.05	0.756	0.989298												1.00	0.1274
IL-1a	Ovarian (serous, invasive HG)	1	1.11,0.58,2.13	0.756	0.989298												0.10	0.0011
sICAM	Ovarian (mucinous, borderline)	2	0.85,0.31,2.33	0.757	0.989298	0.772											0.07	0.0044
TRAIL	Ovarian Serous (invasive LG & HG)	4	0.96,0.71,1.28	0.761	0.989298	0.724	0.52,0.12,2.21	0.373	0.397	0.96,0.50,1.24	0.762	1.01,0.69,1.47	0.959	0.639	NA		0.30	0.0054
SeSelectin	Ovarian (mucinous, borderline)	2	0.65,0.04,10.94	0.763	0.989298	0.053											0.06	0.0016
sICAM	Ovarian (mucinous, borderline & invasive)	2	0.90,0.46,1.78	0.763	0.989298	0.484											0.10	0.0044
IL-1ra	Ovarian (serous, invasive HG)	2	1.05,0.76,1.45	0.764	0.989298	0.057											0.70	0.0170
Eotaxin	Breast (overall)	1	0.98,0.84,1.14	0.765	0.989298												0.69	0.0030
FGFBasic	Ovarian (serous, borderline & invasive LG)	2	1.13,0.50,2.57	0.767	0.989298	0.850											0.15	0.0021
IL-1a	Prostate (high vs low+int risk)	1	0.92,0.53,1.60	0.767	0.989298												0.11	0.0011
IL-8	Breast (overall)	2	0.98,0.86,1.12	0.767	0.989298	0.419											0.89	0.0051
MIG	Prostate (high vs low+int risk)	2	1.04,0.80,1.35	0.767	0.989298	0.207											0.50	0.0081
TRAIL	Lung (small cell)	4	0.91,0.50,1.66	0.768	0.989298	0.796	0.33,0.03,3.27	0.345	0.369	0.81,0.33,1.87	0.690	0.82,0.39,1.75	0.611	0.808	NA		0.10	0.0048
MIF	Prostate (advanced)	4	1.02,0.88,1.18	0.773	0.989298	0.703	1.01,0.69,1.48	0.949	0.959	1.02,0.63,1.32	0.773	1.01,0.85,1.19	0.944	0.797	NA		0.81	0.0181
bNGF	Ovarian (serous, invasive LG)	1	0.80,0.17,3.77	0.774	0.989298												0.06	0.0018
IL-1ra	Ovarian (overall, MA incl. CIMBA)	2	1.03,0.84,1.26	0.774	0.989298	0.107											0.93	0.0170
VEGF	Lung (never smokers)	1	0.65,0.03,12.37	0.774	0.989298												0.05	0.0003
TRAIL	Ovarian (borderline)	4	1.11,0.54,2.30	0.775	0.989298	0.151	2.42,0.04,162.47	0.680	0.711	1.41,0.41,2.21	0.261	1.25,0.60,2.62	0.552	0.227	NA		0.12	0.0054
MIP1a	Lung (ever smokers)	1	0.99,0.91,1.08	0.78	0.989298												0.99	0.0590
TNF-B	Ovarian (serous, borderline & invasive LG)	1	0.86,0.30,2.48	0.78	0.989298												0.12	0.0014
Eotaxin	Lung (small cell)	1	1.11,0.54,2.29	0.781	0.989298												0.08	0.0030
IL-1ra	Prostate (high vs low risk)	2	1.03,0.83,1.29	0.783	0.989298	0.310											0.44	0.0170
MIG	Lung (squamous cell)	2	0.96,0.71,1.30	0.783	0.989298	0.822											0.30	0.0081
bNGF	Ovarian Serous (invasive LG & HG)	1	0.93,0.57,1.54	0.784	0.989298												0.13	0.0018
SeSelectin	Lung (small cell)	2	1.15,0.42,3.11	0.785	0.989298	0.730											0.07	0.0016
IL-8	Ovarian (serous, MA incl. CIMBA)	2	1.04,0.79,1.36	0.789	0.989298	0.816											0.36	0.0051
SeSelectin	Ovarian (serous, invasive HG)	2	0.93,0.55,1.57	0.79	0.989298	0.887											0.12	0.0016
sVCAM	Ovarian (overall, invasive)	1	0.96,0.70,1.32	0.792	0.989298												0.24	0.0030
IL-18	Ovarian (serous, invasive HG)	2	1.02,0.86,1.21	0.796	0.989298	0.202											0.84	0.0243
SeSelectin	Breast (triple negative)	2	1.16,0.37,3.65	0.796	0.989298	0.024											0.11	0.0016
TRAIL	Lung (ever smokers)	4	0.96,0.70,1.31	0.796	0.989298	0.298	0.47,0.10,2.27	0.347	0.363	0.85,0.61,1.27	0.312	0.85,0.59,1.23	0.392	0.355	NA		0.26	0.0054
IL-1ra	Breast (overall)	2	0.99,0.93,1.06	0.797	0.989298	0.329											1.00	0.0170
SCGFb	Lung (never smokers)	1	1.11,0.49,2.52	0.797	0.989298												0.08	0.0040
Eotaxin	Ovarian (serous, borderline)	1	0.89,0.37,2.13	0.799	0.989298												0.08	0.0030
IL-6	Prostate (high vs low+int risk)	1	1.10,0.52,2.33	0.8	0.989298												0.08	0.0006
MIP1a	Prostate (high vs low risk)	1	0.99,0.88,1.11	0.8	0.989298												0.92	0.0590
IL-8	Ovarian (serous, borderline)	2	1.10,0.53,2.26	0.803	0.989298	0.580											0.09	0.0051
SeSelectin	Ovarian (endometrioid, invasive)	2	1.35,0.13,14.63	0.803	0.989298	0.014											0.07	0.0016
MCP1	Prostate (advanced)	3	0.93,0.54,1.61	0.805	0.989298	0.763	0.54,0.05,5.81	0.614	0.646	0.94,0.04,178.72	0.805	0.92,0.08,10.32	0.946				0.13	0.0015
MCP1	Lung (ever smokers)	2	1.07,0.61,1.90	0.806	0.989298	0.292											0.10	0.0014
MCSF	Ovarian (overall, invasive)	3	1.02,0.88,1.18	0.811	0.989298	0.509	1.19,0.88,1.61	0.262	0.252			1.03,0.89,1.19	0.730				0.85	0.0176
SCF	Ovarian (serous, borderline)	1	1.32,0.14,12.90	0.811	0.989298												0.05	0.0004
IL-2ra	Lung (small cell)	4	0.99,0.87,1.11	0.813	0.989298	0.441	0.90,0.72,1.12	0.333	0.319	0.97,0.87,1.11	0.675	0.97,0.85,1.11	0.679	0.613	NA		0.93	0.1296
IL-16	Breast (triple negative)	4	1.02,0.89,1.15	0.815	0.989298	0.861	0.98,0.84,1.15	0.790	0.434	1.02,0.90,1.14	0.815	1.01,0.88,1.15	0.928	0.740	NA		0.86	0.0303
MCSF	Endometrial (non-endometrioid)	3	1.06,0.66,1.70	0.815	0.989298	0.705	0.82,0.30,2.20	0.691	0.560			1.04,0.23,4.62	0.960				0.15	0.0176
IL-8	Endometrial (endometrioid)	2	1.05,0.72,1.53	0.816	0.989298	0.377											0.22	0.0051
MCP1	Lung (small cell)	2	1.14,0.38,3.38	0.818	0.989298	0.669											0.07	0.0014
MIF	Ovarian (serous, borderline)	4	1.04,0.73,1.50	0.818	0.989298	0.706	0.76,0.30,1.95	0.570	0.476	1.04,0.55,2.16	0.819	1.00,0.66,1.52	0.995	0.825	NA		0.21	0.0181
TNF-B	Lung (never smokers)	1	1.17,0.30,4.57	0.819	0.989298												0.06	0.0014
Eotaxin	Ovarian (overall, MA incl. CIMBA)	1	0.97,0.72,1.30	0.82	0.989298												0.30	0.0030
MIG	Ovarian (serous, invasive HG)	2	0.97,0.76,1.25	0.82	0.989298	0.436											0.40	0.0081
bNGF	Endometrial (overall)	1	1.06,0.64,1.74	0.823	0.989298												0.15	0.0018
MIP1b	Ovarian (serous, MA incl. CIMBA)	3	1.04,0.74,1.47	0.823	0.989298	0.982	1.11,0.43,2.87	0.826	0.883			1.05,0.72,1.52	0.806				0.24	0.0031
IL-1ra	Ovarian (mucinous, borderline & invasive)	2	0.96,0.70,1.33	0.828	0.989298	0.810											0.25	0.0170
IL-8	Lung (small cell)	2	0.93,0.48,1.79	0.828	0.989298	0.334											0.10	0.0051
IL-16	Endometrial (overall)	4	1.01,0.90,1.14	0.829	0.989298	0.958	1.01,0.87,1.17	0.904	0.927	1.01,0.90,1.15	0.834	1.02,0.90,1.15	0.801	0.962	NA		0.96	0.0303
bNGF	Ovarian (serous, invasive HG)	1	0.95,0.57,1.58	0.83	0.989298												0.13	0.0018
GROa	Ovarian (overall, invasive)	1	1.01,0.96,1.06	0.831	0.989298												1.00	0.1274
SeSelectin	Lung (squamous cell)	2	0.93,0.50,1.75	0.831	0.989298	0.855											0.10	0.0016
IL-8	Endometrial (overall)	2	0.97,0.70,1.33	0.832	0.989298	0.673											0.32	0.0051
MIP1b	Ovarian (borderline)	3	0.88,0.26,3.00	0.834	0.989298	0.073	7.52,0.95,59.48	0.056	0.029			0.92,0.40,2.12	0.842				0.09	0.0031
MIF	Ovarian (overall, MA incl. CIMBA)	4	0.98,0.85,1.14	0.836	0.989298	0.221	0.85,0.56,1.28	0.426	0.434	0.95,0.73,1.11	0.473	0.97,0.84,1.12	0.664	0.429	NA		0.94	0.0181
CTACK	Lung (overall)	2	0.99,0.91,1.08	0.837	0.989298	0.388											1.00	0.0415
MIP1b	Lung (never smokers)	3	0.91,0.36,2.31	0.837	0.989298	0.750	2.23,0.18,27.96	0.533	0.452			0.92,0.34,2.50	0.868				0.07	0.0031
SCF	Ovarian (serous, invasive LG)	1	1.39,0.06,31.51	0.837	0.989298												0.05	0.0004
IL-8	Breast (luminal B, HER2 neg.)	2	1.05,0.64,1.73	0.838	0.989298	0.112											0.37	0.0051
MIP1b	Ovarian Serous (invasive LG & HG)	3	1.04,0.69,1.57	0.838	0.989298	0.823	1.38,0.45,4.20	0.569	0.595			1.06,0.69,1.65	0.779				0.19	0.0031
SCGFb	Endometrial (overall)	1	1.04,0.72,1.49	0.838	0.989298												0.27	0.0040
bNGF	Ovarian (overall, MA incl. CIMBA)	1	0.96,0.66,1.41	0.84	0.989298												0.20	0.0018
IL-8	Lung (overall)	2	1.03,0.79,1.33	0.84	0.989298	0.732											0.46	0.0051
SCF	Breast (triple negative)	1	0.90,0.33,2.46	0.841	0.989298												0.07	0.0004
VEGF	Endometrial (overall)	1	1.14,0.33,3.97	0.841	0.989298												0.07	0.0003
MIP1a	Breast (triple negative)	1	1.01,0.92,1.10	0.843	0.989298												0.99	0.0590
MIP1a	Lung (never smokers)	1	0.98,0.80,1.20	0.843	0.989298												0.50	0.0590
IL-16	Ovarian (serous, MA incl. CIMBA)	4	0.99,0.87,1.12	0.844	0.989298	0.201	1.02,0.85,1.22	0.855	0.580	1.01,0.91,1.11	0.888	1.00,0.89,1.11	0.944	0.541	NA		0.97	0.0303
MCSF	Prostate (high vs low risk)	3	0.97,0.75,1.27	0.844	0.989298	0.242	0.71,0.45,1.13	0.149	0.130			0.95,0.46,1.94	0.886				0.45	0.0176
sICAM	Breast (triple negative)	2	1.07,0.54,2.15	0.844	0.989298	0.045											0.21	0.0044
IL-8	Breast (luminal B)	2	1.04,0.72,1.50	0.847	0.989298	0.716											0.37	0.0051
MCSF	Ovarian (endometrioid, invasive)	3	0.97,0.71,1.32	0.847	0.989298	0.883	0.84,0.43,1.61	0.595	0.618			0.96,0.49,1.90	0.907				0.27	0.0176
RANTES	Endometrial (endometrioid)	1	1.03,0.78,1.35	0.848	0.989298												0.36	0.0091
IL-16	Ovarian (mucinous, borderline & invasive)	4	1.02,0.81,1.30	0.849	0.989298	0.567	1.04,0.78,1.40	0.784	0.838	1.02,0.80,1.31	0.849	1.04,0.81,1.34	0.737	0.701	NA		0.39	0.0303
MIG	Lung (small cell)	2	1.07,0.52,2.23	0.85	0.989298	0.126											0.14	0.0081
MIP1b	Endometrial (non-endometrioid)	3	1.12,0.33,3.82	0.85	0.989298	0.713	0.31,0.01,8.85	0.496	0.420			1.12,0.30,4.13	0.867				0.07	0.0031
TRAIL	Lung (overall)	4	1.02,0.82,1.28	0.85	0.989298	0.423	0.56,0.19,1.67	0.296	0.268	0.94,0.74,1.29	0.614	0.94,0.71,1.25	0.666	0.494	NA		0.48	0.0054
IL-18	Ovarian (mucinous, borderline)	2	1.04,0.66,1.65	0.851	0.989298	0.224											0.18	0.0243
Eotaxin	Breast (luminal A)	1	0.98,0.80,1.20	0.852	0.989298												0.50	0.0030
SCF	Ovarian (endometrioid, invasive)	1	0.84,0.13,5.54	0.852	0.989298												0.06	0.0004
SCF	Ovarian (mucinous, borderline & invasive)	1	0.83,0.12,5.93	0.852	0.989298												0.05	0.0004
CTACK	Ovarian (serous, invasive LG)	2	0.97,0.67,1.39	0.853	0.989298	0.519											0.25	0.0415
MIP1a	Ovarian (serous, borderline & invasive LG)	1	0.98,0.83,1.16	0.853	0.989298												1.00	0.0590
MIP1b	Lung (ever smokers)	3	0.96,0.61,1.51	0.853	0.989298	0.267	1.74,0.52,5.78	0.366	0.294			1.02,0.66,1.58	0.917				0.17	0.0031
SCF	Ovarian (borderline)	1	0.84,0.13,5.36	0.853	0.989298												0.06	0.0004
Eotaxin	Lung (adenocarcinoma)	1	1.04,0.69,1.55	0.854	0.989298												0.18	0.0030
IL-6	Ovarian (serous, invasive HG)	1	1.09,0.43,2.73	0.855	0.989298												0.07	0.0006
sICAM	Breast (luminal B)	2	1.04,0.69,1.55	0.856	0.989298	0.900											0.32	0.0044
TRAIL	Endometrial (overall)	4	1.03,0.76,1.38	0.856	0.989298	0.869	1.74,0.41,7.37	0.454	0.467	1.02,0.68,1.67	0.857	1.00,0.69,1.46	0.986	0.900	NA		0.34	0.0054
CTACK	Ovarian (serous, invasive HG)	2	1.01,0.90,1.14	0.858	0.989298	0.630											0.97	0.0415
MCP1	Ovarian (mucinous, borderline)	3	0.79,0.06,10.67	0.859	0.989298	0.087	239.25,0.01,10369117.97	0.315	0.281	0.93,0.00,41.31	0.893	0.88,0.00,6433283465704779794020486.00	0.997				0.06	0.0015
bNGF	Breast (luminal B)	1	0.95,0.53,1.69	0.86	0.989298												0.16	0.0018
VEGF	Ovarian (overall, MA incl. CIMBA)	1	0.92,0.35,2.38	0.86	0.989298												0.08	0.0003
MIP1b	Breast (triple negative)	3	0.96,0.64,1.45	0.861	0.989298	0.919	1.09,0.36,3.32	0.875	0.812			0.99,0.64,1.53	0.961				0.16	0.0031
sVCAM	Lung (never smokers)	1	0.93,0.39,2.20	0.861	0.989298												0.07	0.0030
CTACK	Ovarian (borderline)	2	0.98,0.79,1.22	0.862	0.989298	0.452											0.58	0.0415
MIP1a	Ovarian (overall, invasive)	1	0.99,0.92,1.07	0.862	0.989298												1.00	0.0590
bNGF	Prostate (overall)	1	0.98,0.75,1.27	0.864	0.989298												0.30	0.0018
VEGF	Endometrial (endometrioid)	1	0.88,0.20,3.86	0.864	0.989298												0.06	0.0003
FGFBasic	Ovarian (mucinous, borderline)	2	1.12,0.32,3.93	0.865	0.989298	0.899											0.06	0.0021
MIG	Endometrial (overall)	2	0.97,0.72,1.32	0.865	0.989298	0.206											0.47	0.0081
IL-1ra	Breast (HER2 enriched)	2	0.98,0.74,1.28	0.866	0.989298	0.881											0.70	0.0170
MIF	Endometrial (endometrioid)	4	0.98,0.81,1.19	0.867	0.989298	0.481	0.85,0.52,1.38	0.502	0.510	0.98,0.55,1.19	0.867	1.00,0.80,1.25	0.989	0.639	NA		0.61	0.0181
TRAIL	Lung (squamous cell)	4	1.03,0.72,1.49	0.868	0.989298	0.369	0.61,0.08,4.82	0.641	0.612	0.87,0.51,1.52	0.501	0.92,0.58,1.48	0.744	0.396	NA		0.21	0.0054
IL-2ra	Ovarian (serous, borderline & invasive LG)	4	1.01,0.87,1.18	0.87	0.989298	0.181	1.04,0.74,1.46	0.813	0.846	1.04,0.91,1.18	0.526	1.03,0.91,1.17	0.626	0.397	NA		1.00	0.1296
RANTES	Ovarian (endometrioid, invasive)	1	0.96,0.62,1.50	0.871	0.989298												0.16	0.0091
GROa	Ovarian (serous, MA incl. CIMBA)	1	1.00,0.96,1.05	0.873	0.989298												1.00	0.1274
MIP1a	Endometrial (non-endometrioid)	1	1.02,0.79,1.33	0.875	0.989298												0.38	0.0590
IL-2ra	Ovarian (serous, borderline)	4	0.99,0.86,1.14	0.877	0.989298	0.478	1.01,0.76,1.36	0.937	0.854	0.99,0.85,1.24	0.886	1.00,0.86,1.17	0.961	0.644	NA		0.87	0.1296
MIP1a	Lung (squamous cell)	1	1.01,0.91,1.12	0.877	0.989298												0.97	0.0590
SeSelectin	Breast (HER2 enriched)	2	0.94,0.40,2.19	0.878	0.989298	0.773											0.12	0.0016
GROa	Ovarian (serous, invasive HG)	1	1.00,0.95,1.07	0.88	0.989298												1.00	0.1274
IL-18	Ovarian (serous, MA incl. CIMBA)	2	0.99,0.89,1.11	0.881	0.989298	0.420											0.94	0.0243
IL-1a	Ovarian Serous (invasive LG & HG)	1	1.05,0.56,1.98	0.884	0.989298												0.10	0.0011
IL-16	Endometrial (non-endometrioid)	4	1.03,0.72,1.46	0.885	0.989298	0.631	0.91,0.59,1.40	0.659	0.339	0.98,0.66,1.42	0.895	0.98,0.68,1.41	0.905	0.448	NA		0.22	0.0303
IL-1ra	Prostate (advanced)	2	1.01,0.87,1.18	0.885	0.989298	0.885											0.79	0.0170
MIP1a	Ovarian (serous, MA incl. CIMBA)	1	0.99,0.92,1.07	0.886	0.989298												1.00	0.0590
sVCAM	Ovarian (serous, borderline)	1	0.94,0.41,2.18	0.886	0.989298												0.08	0.0030
MCP1	Breast (luminal B)	3	0.95,0.49,1.86	0.888	0.989298	0.862	0.82,0.04,15.80	0.895	0.918	0.95,0.01,279.70	0.888	0.95,0.03,35.15	0.979				0.14	0.0015
IL-1ra	Endometrial (non-endometrioid)	2	1.04,0.61,1.78	0.891	0.989298	0.247											0.15	0.0170
SeSelectin	Endometrial (overall)	2	0.94,0.40,2.20	0.891	0.989298	0.098											0.14	0.0016
SeSelectin	Breast (luminal A)	2	1.02,0.78,1.33	0.892	0.989298	0.889											0.31	0.0016
TNF-B	Lung (adenocarcinoma)	1	0.96,0.52,1.77	0.893	0.989298												0.11	0.0014
FGFBasic	Ovarian (mucinous, borderline & invasive)	2	0.93,0.33,2.63	0.898	0.991332	0.231											0.07	0.0021
IL-6	Ovarian (serous, MA incl. CIMBA)	1	0.95,0.44,2.04	0.898	0.991332												0.08	0.0006
sVCAM	Breast (HER2 enriched)	1	1.04,0.56,1.93	0.898	0.991332												0.18	0.0030
Eotaxin	Ovarian (mucinous, borderline)	1	1.07,0.35,3.28	0.9	0.991332												0.07	0.0030
MCP1	Ovarian (clearcell, invasive)	3	0.91,0.20,4.06	0.9	0.991332	0.834	0.17,0.00,119.81	0.597	0.607	0.90,0.17,175.84	0.901	0.87,0.00,252.33	0.960				0.06	0.0015
MIP1b	Ovarian (clearcell, invasive)	3	0.87,0.10,7.33	0.901	0.991332	0.020	40.74,2.19,759.51	0.013	0.006			0.86,0.26,2.85	0.803				0.07	0.0031
FGFBasic	Ovarian (mucinous, invasive)	2	0.87,0.09,8.45	0.902	0.991332	0.047											0.06	0.0021
bNGF	Breast (triple negative)	1	0.97,0.59,1.60	0.903	0.991332												0.12	0.0018
IL-18	Ovarian Serous (invasive LG & HG)	2	1.01,0.88,1.16	0.904	0.991332	0.286											0.86	0.0243
TRAIL	Prostate (high vs low risk)	4	0.98,0.65,1.46	0.904	0.991332	0.521	0.40,0.06,2.79	0.352	0.355	0.85,0.51,1.74	0.555	0.92,0.55,1.54	0.743	0.620	NA		0.17	0.0054
TRAIL	Ovarian (endometrioid, invasive)	4	1.03,0.59,1.80	0.907	0.991332	0.528	7.76,0.52,116.47	0.138	0.136	1.04,0.62,3.34	0.907	1.10,0.53,2.28	0.798	0.512	NA		0.12	0.0054
VEGF	Lung (adenocarcinoma)	1	0.92,0.24,3.55	0.907	0.991332												0.06	0.0003
MIP1b	Ovarian (serous, borderline & invasive LG)	3	0.96,0.44,2.06	0.909	0.991332	0.762	1.87,0.23,15.19	0.559	0.501			0.99,0.43,2.25	0.972				0.20	0.0031
IL-16	Prostate (advanced)	4	0.99,0.89,1.11	0.91	0.991332	0.589	1.02,0.88,1.17	0.823	0.589	1.00,0.89,1.11	0.916	1.00,0.89,1.12	0.964	0.782	NA		0.96	0.0303
IL-1ra	Ovarian (overall, invasive)	2	1.02,0.78,1.32	0.91	0.991332	0.066											0.84	0.0170
sICAM	Ovarian (mucinous, invasive)	2	0.95,0.39,2.32	0.91	0.991332	0.428											0.08	0.0044
RANTES	Ovarian (serous, borderline & invasive LG)	1	0.98,0.63,1.52	0.912	0.991332												0.48	0.0091
Eotaxin	Lung (overall)	1	0.98,0.65,1.46	0.913	0.991332												0.18	0.0016
IL-1a	Ovarian (borderline)	1	0.94,0.29,3.04	0.914	0.991332												0.06	0.0011
Eotaxin	Endometrial (overall)	1	1.02,0.70,1.49	0.918	0.991332												0.21	0.0030
IL-18	Ovarian (serous, borderline)	2	0.98,0.73,1.32	0.918	0.991332	0.421											0.27	0.0243
IL-6	Ovarian (borderline)	1	0.92,0.18,4.80	0.919	0.991332												0.06	0.0006
RANTES	Endometrial (overall)	1	1.01,0.80,1.28	0.92	0.991332												0.52	0.0091
GROa	Ovarian (serous, invasive LG)	1	0.99,0.83,1.19	0.921	0.991332												0.61	0.1274
[truncated: 68 more rows]

## Sheet: S7. Druggable targets
Supplementary Table 7
[truncated: 39 more rows]

## Sheet: S8. Observational_Evidence
Supplementary Table 8
[truncated: 90 more rows]

[truncated: 7 more sheets: S9. Kegg pathways, S10. Colocalization, S11a. Associated cytokines, S11b. Associated traits, S12a. Sensitivity_pleiotropic, S12b. Sensitivity_LD, S13. UkBioBank replication]
